# Supplementary material for: Metagenomic Strain-Typing Combined with Isolate Sequencing Provides Increased Resolution of the Genetic Diversity of Campylobacter jejuni Carriage in Wild Birds
Source: MDPI journal article supplement (doi:10.3390/microorganisms11010121), 2023-01-03
Supplement: s1 [file s1]

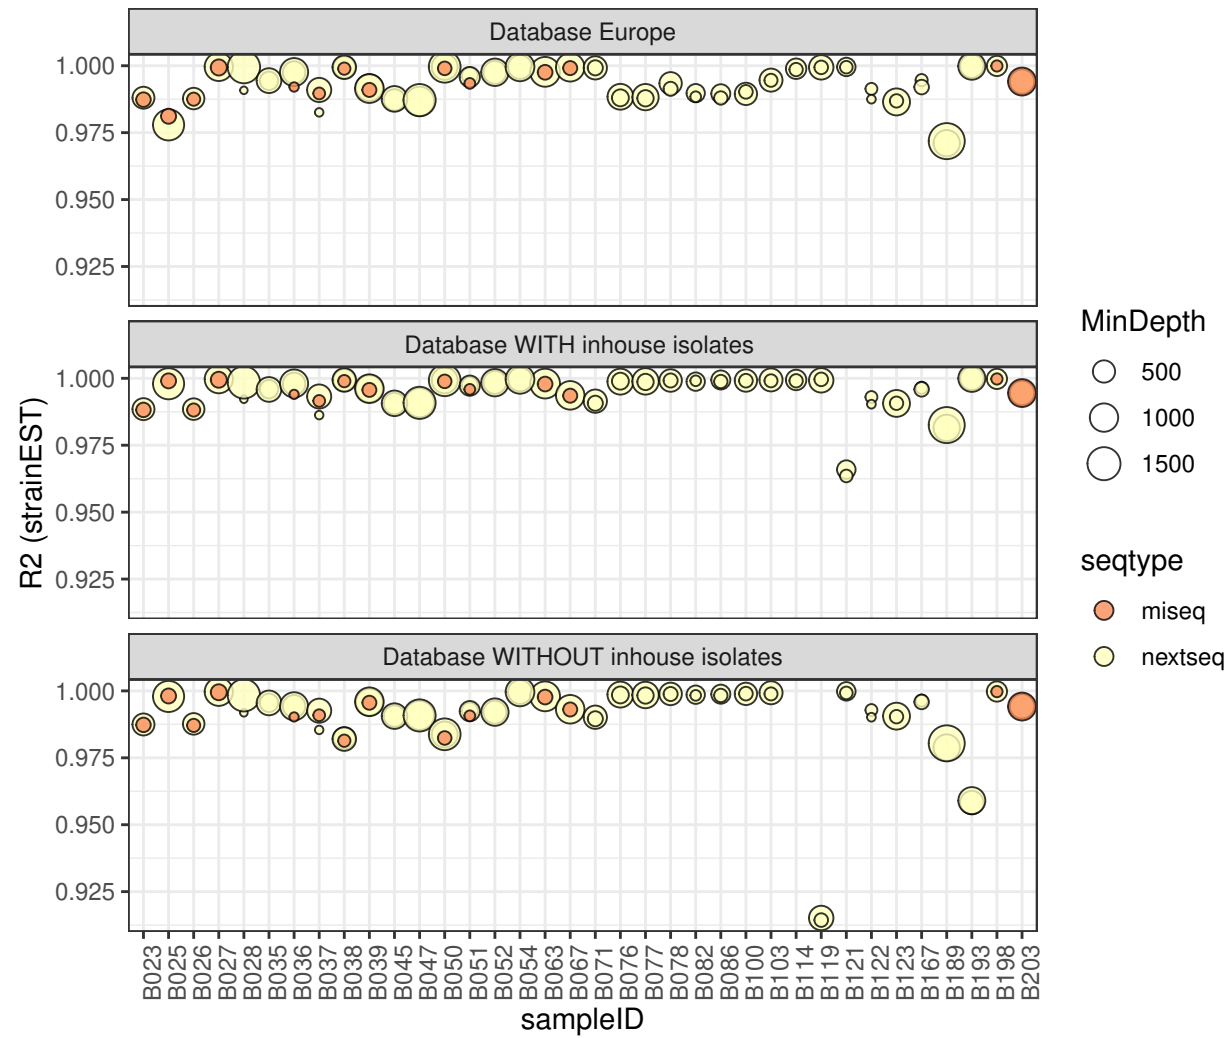

Supplementary Figure S2: Overview of re-sequenced samples for the three databases (EU, WI, and NI) from top to bottom, showing R2-values from StrainEST and MinDepth (point size). Point color indicates the sequencing platform.
