# Supplementary material for: Metagenomic Strain-Typing Combined with Isolate Sequencing Provides Increased Resolution of the Genetic Diversity of Campylobacter jejuni Carriage in Wild Birds
Source: MDPI journal article supplement (doi:10.3390/microorganisms11010121), 2023-01-03
Supplement: s1 [file s1]

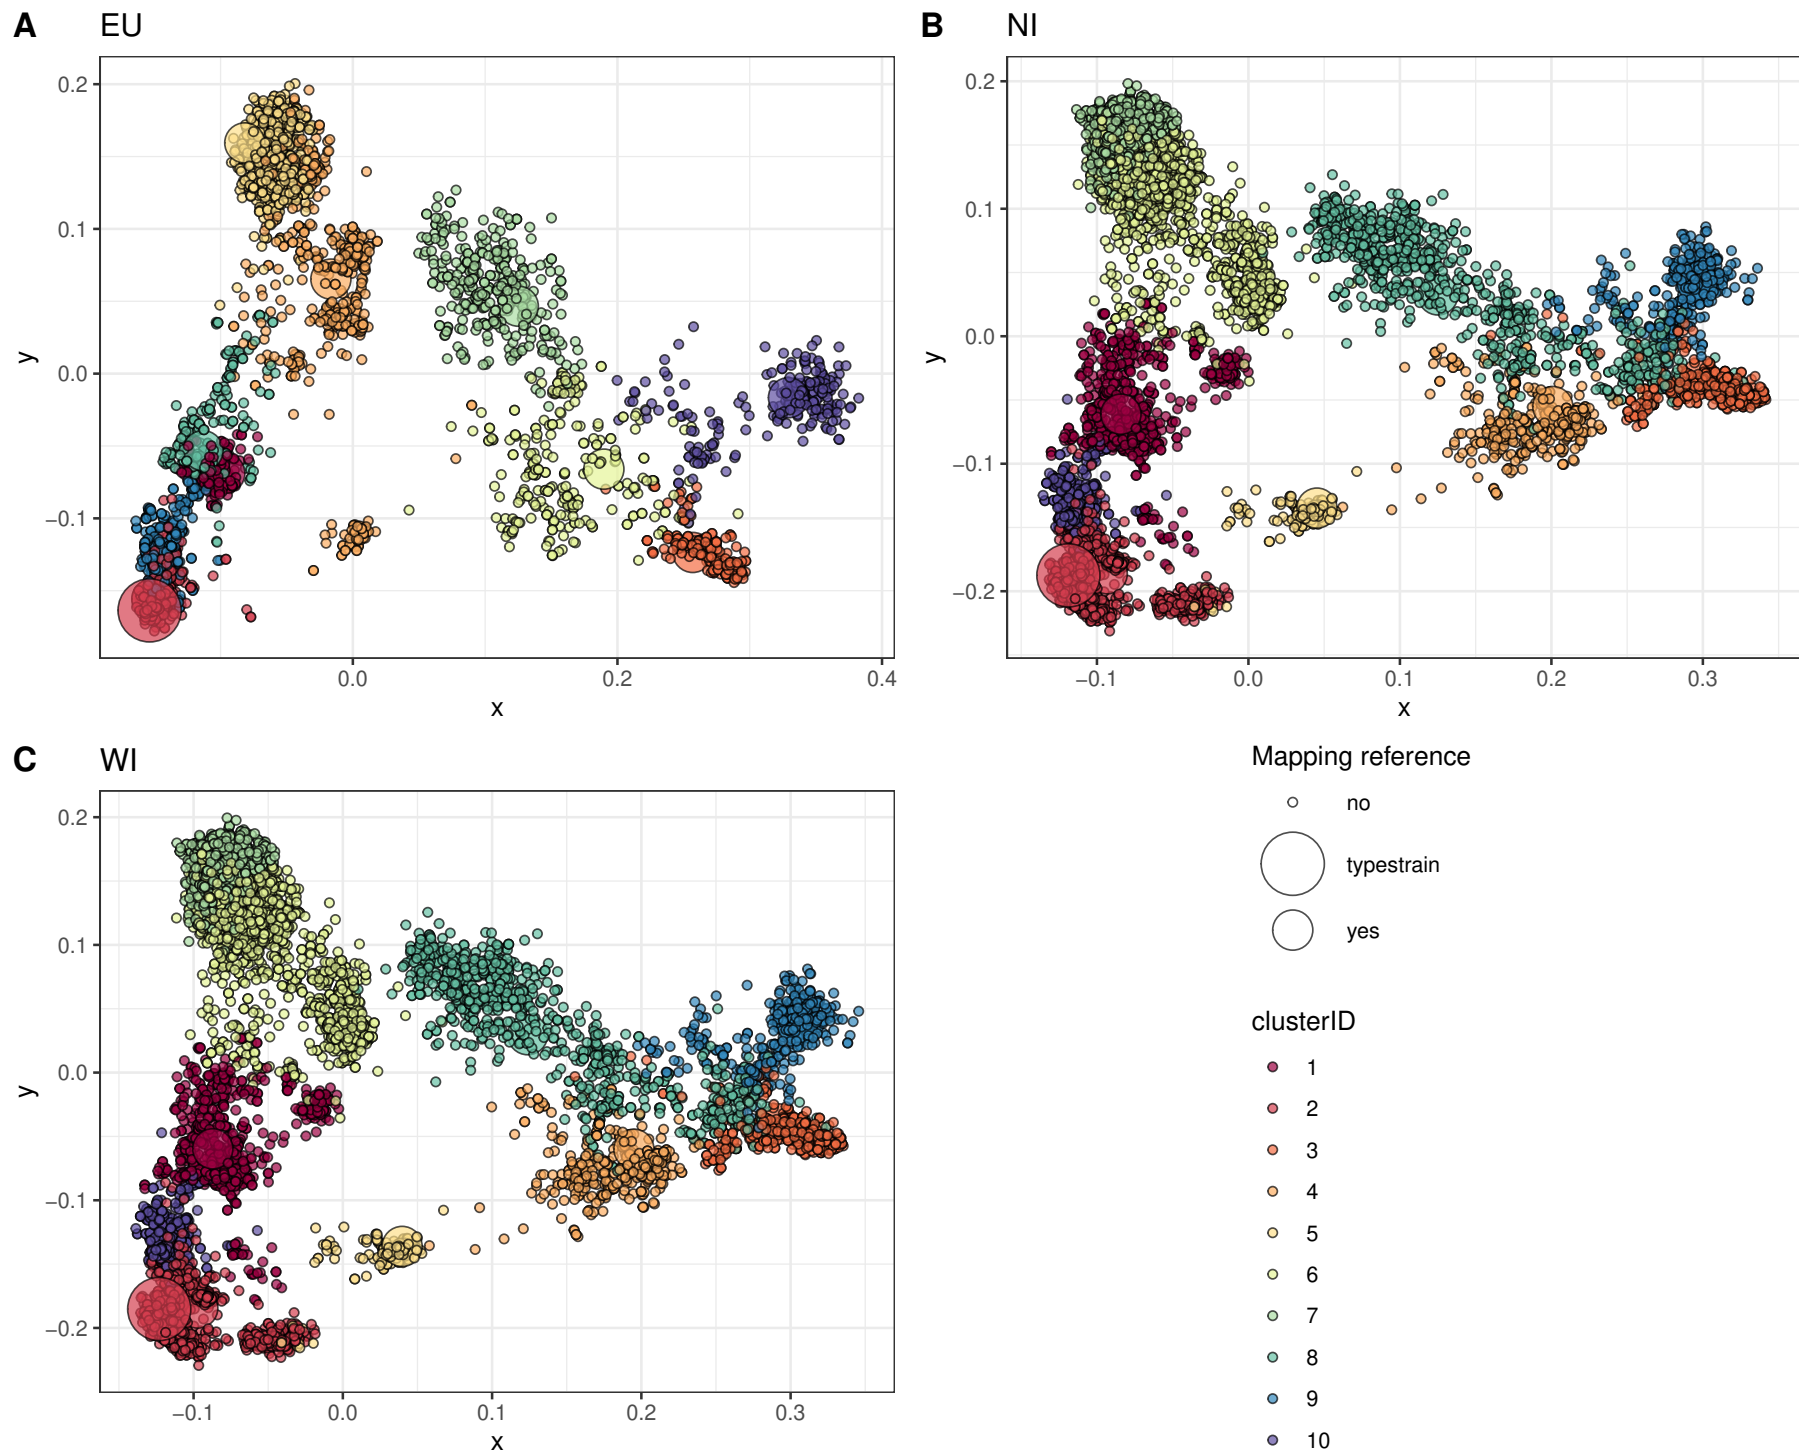

Supplementary Figure S1: PcoA plots of sourmash distances with selected clusters (color) and mapping-representatives highlighted (point size), for the three databases: Including inhouse isolates and only European reference genomes (A), excluding inhouse isolates (B), and including inhouse isolates (C)
