# Supplementary material for: Metagenomic Strain-Typing Combined with Isolate Sequencing Provides Increased Resolution of the Genetic Diversity of Campylobacter jejuni Carriage in Wild Birds
Source: MDPI journal article supplement (doi:10.3390/microorganisms11010121), 2023-01-03
Supplement: s1 [file s1]

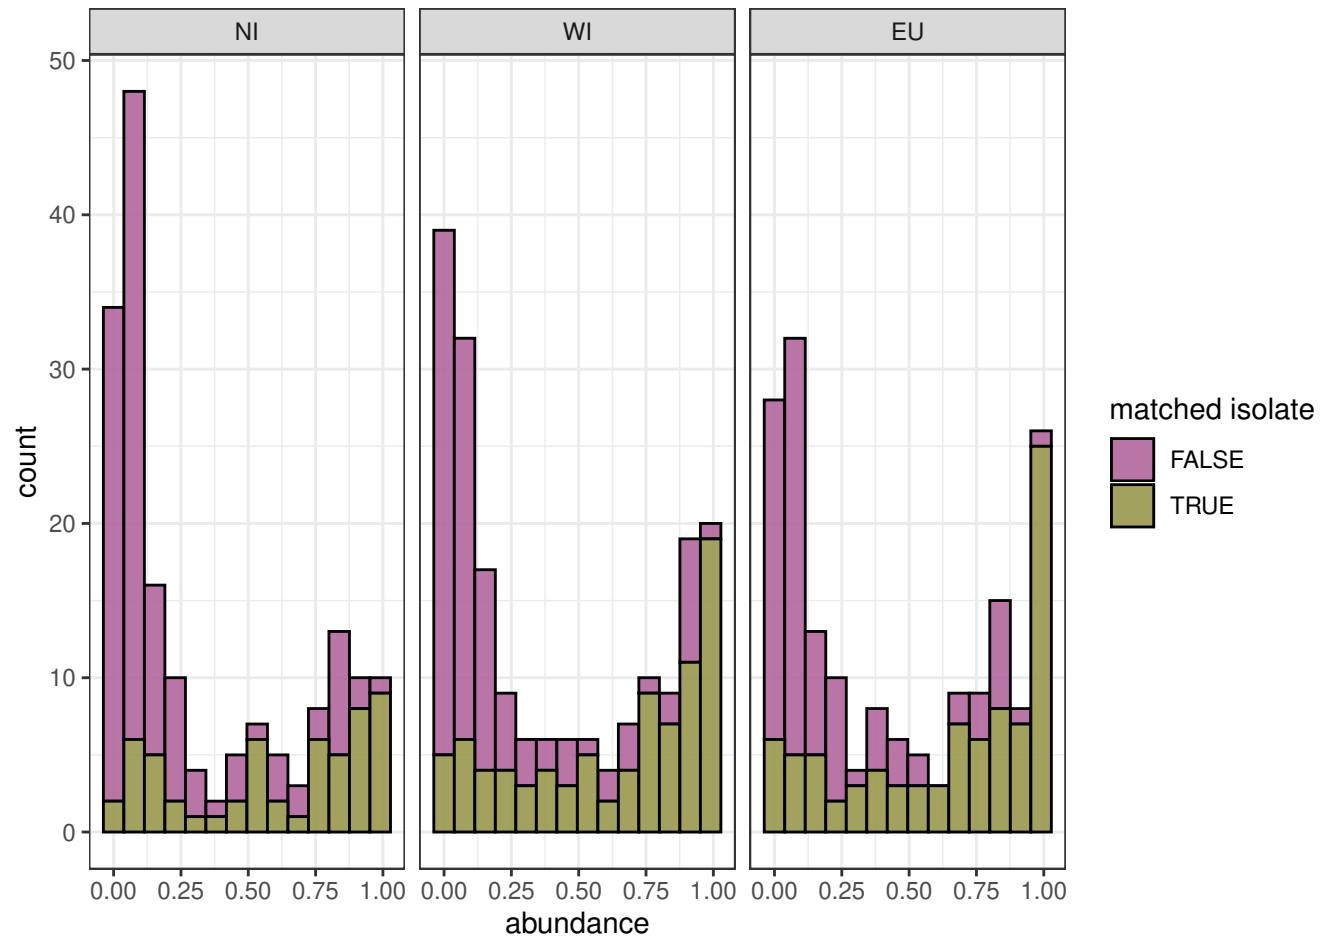

Supplementary Figure S3: Abundance histograms of predicted strain profiles with and without matching isolates. Panels are separated according to databases (NI: without isolates from this study, WI: including isolates from this study, EU: including isolates from this study and only reference genomes from Europe)
