# Supplementary material for: Metagenomic Strain-Typing Combined with Isolate Sequencing Provides Increased Resolution of the Genetic Diversity of Campylobacter jejuni Carriage in Wild Birds
Source: Microorganisms. 2023 Jan 3;11(1):121. doi: 10.3390/microorganisms11010121 (PMC9860660; doi:10.3390/microorganisms11010121)
Supplement: Supplementary file 1 [file microorganisms-11-00121-s001.zip]

Archive with 8 entries (8 files):
- Supplementary_Data_S1.xlsx
- Supplementary_Data_S2.tsv
- Supplementary_Data_S3.xlsx
- Supplementary_Data_S4.xlsx
- Supplementary_Data_S5.xlsx
- Supplementary_Figure_S1.pdf
- Supplementary_Figure_S2.pdf
- Supplementary_Figure_S3.pdf
