# Supplementary material for: Metagenomic Strain-Typing Combined with Isolate Sequencing Provides Increased Resolution of the Genetic Diversity of Campylobacter jejuni Carriage in Wild Birds
Source: Microorganisms. 2023 Jan 3;11(1):121. doi: 10.3390/microorganisms11010121 (PMC9860660; doi:10.3390/microorganisms11010121)
Supplement: Supplementary file 1 [file microorganisms-11-00121-s001.zip › Supplementary_Data_S1.xlsx]

## Sheet: Isolates_Information_workingfil
Strain ID	sampleID	Sampling type	Origin	Identification	ST	CC	aspA	glnA	gltA	glyA	pgm	tkt	uncA	Complex Type	fn_gyrA	porA	genome	MG_available	date	Sampling location
B015-230519-01	B015	Bird	Cygnus	C. jejuni	45	ST-45 complex	4	7	10	4	1	7	1	2052	7	467	B015-230519-01.fasta	TRUE	2019-05-23T00:00:00Z	Dudelange
B021-070519-01	B021	Bird	Corvus corone	C. jejuni	48	ST-48 complex	2	4	1	2	7	1	5	153	3	7	B021-070519-01.fasta	TRUE	2019-05-07T00:00:00Z	Dudelange
B023-070519-01	B023	Bird	Corvus corone	C. jejuni	448	?	61	70	22	18	2	74	47	2154	102	2353	B023-070519-01.fasta	TRUE	2019-05-07T00:00:00Z	Dudelange
B025-070519-02	B025	Bird	Corvus corone	C. jejuni	677	ST-677 complex	10	81	50	99	120	76	52	942	19	276	B025-070519-02.fasta	TRUE	2019-05-07T00:00:00Z	Dudelange
B026-230519-01	B026	Bird	Pica pica	C. jejuni	448	?	61	70	22	18	2	74	47	2154	102	2353	B026-230519-01.fasta	TRUE	2019-05-23T00:00:00Z	Dudelange
B027-070519-01	B027	Bird	Pica pica	C. jejuni	45	ST-45 complex	4	7	10	4	1	7	1	2155	7	49	B027-070519-01.fasta	TRUE	2019-05-07T00:00:00Z	Dudelange
B028-230519-01	B028	Bird	Corvus corone	C. jejuni	2491	?	64	22	212	100	134	233	16	2156	11	1634	B028-230519-01.fasta	TRUE	2019-05-23T00:00:00Z	Dudelange
B029-110619-02	B029	Bird	Pica pica	C. jejuni	448	?	61	70	22	18	2	74	47	2624	31	860	B029-110619-02.fasta	TRUE	2019-06-11T00:00:00Z	Dudelange
B036-110619-01	B036	Bird	Corvus monedula	C. jejuni	1540	ST-1275 complex	76	33	22	104	43	109	31	2157	40	860	B036-110619-01.fasta	TRUE	2019-06-11T00:00:00Z	Dudelange
B036-110619-03	B036	Bird	Corvus monedula	C. jejuni	10813	?	64	22	148	100	94	187	16	2157	11	2351	B036-110619-03.fasta	TRUE	2019-06-11T00:00:00Z	Dudelange
B037-110619-01	B037	Bird	Corvus monedula	C. jejuni	45	ST-45 complex	4	7	10	4	1	7	1	2158	7	49	B037-110619-01.fasta	TRUE	2019-06-11T00:00:00Z	Dudelange
B038-110619-01	B038	Bird	Corvus monedula	C. jejuni	10818	?	64	22	20	100	134	301	16	2159	104	391	B038-110619-01.fasta	TRUE	2019-06-11T00:00:00Z	Dudelange
B038-110619-02	B038	Bird	Corvus monedula	C. jejuni	10811	?	64	33	20	181	94	17	16	2160	36	1279	B038-110619-02.fasta	TRUE	2019-06-11T00:00:00Z	Dudelange
B038-110619-03	B038	Bird	Corvus monedula	C. jejuni	10817	?	258	174	154	193	336	421	131	2161	103	2354	B038-110619-03.fasta	TRUE	2019-06-11T00:00:00Z	Dudelange
B039-110619-03	B039	Bird	Corvus monedula	C. jejuni	10820	?	64	89	319	100	134	103	16	2162	11	1224	B039-110619-03.fasta	TRUE	2019-06-11T00:00:00Z	Dudelange
B045-180619-01	B045	Bird	Corvus monedula	C. jejuni	464	ST-464 complex	24	2	2	2	10	3	1	596	3	2348	B045-180619-01.fasta	TRUE	2019-06-18T00:00:00Z	Dudelange
B047-180619-01	B047	Bird	Falco	C. jejuni	19	ST-21 complex	2	1	5	3	2	1	5	2165	8	327	B047-180619-01.fasta	TRUE	2019-06-18T00:00:00Z	Dudelange
B050-180619-01	B050	Bird	Corvus monedula	C. jejuni	10813	?	64	22	148	100	94	187	16	2166	11	2351	B050-180619-01.fasta	TRUE	2019-06-18T00:00:00Z	Dudelange
B050-180619-02	B050	Bird	Corvus monedula	C. jejuni	1080	?	10	2	107	137	120	76	1	2301	74	130	B050-180619-02.fasta	TRUE	2019-06-18T00:00:00Z	Dudelange
B051-180619-02	B051	Bird	Corvus corone	C. jejuni	10815	?	18	81	68	143	134	153	16	2167	11	479	B051-180619-02.fasta	TRUE	2019-06-18T00:00:00Z	Dudelange
B052-180619-01	B052	Bird	Corvus monedula	C. jejuni	7815	?	64	105	203	100	134	94	16	2168	11	2352	B052-180619-01.fasta	TRUE	2019-06-18T00:00:00Z	Dudelange
B054-180619-01	B054	Bird	Corvus corone	C. jejuni	3536	?	64	22	20	100	134	160	16	2169	104	391	B054-180619-01.fasta	TRUE	2019-06-18T00:00:00Z	Dudelange
B054-180619-02	B054	Bird	Corvus corone	C. jejuni	801	?	64	70	68	97	122	106	16	2598	36	127	B054-180619-02.fasta	TRUE	2019-06-18T00:00:00Z	Dudelange
B063-020719-01	B063	Bird	Apus apus	C. jejuni	11384	ST-177 complex	17	2	670	5	8	2	4	2170	31	236	B063-020719-01.fasta	TRUE	2019-07-02T00:00:00Z	Dudelange
B063-020719-02	B063	Bird	Apus apus	C. jejuni	22	ST-22 complex	1	3	6	4	3	3	3	277	8	70	B063-020719-02.fasta	TRUE	2019-07-02T00:00:00Z	Dudelange
B067-020719-01	B067	Bird	Pica pica	C. jejuni	383	ST-283 complex	4	7	12	4	42	51	1	251	1	73	B067-020719-01.fasta	TRUE	2019-07-02T00:00:00Z	Dudelange
B068-020719-02	B068	Bird	Pica pica	C. jejuni	383	ST-283 complex	4	7	12	4	42	51	1	251	1	73	B068-020719-02.fasta	TRUE	2019-07-02T00:00:00Z	Dudelange
B071-020719-01	B071	Bird	Corvus corone	C. jejuni	45	ST-45 complex	4	7	10	4	1	7	1	2171	7	44	B071-020719-01.fasta	TRUE	2019-07-02T00:00:00Z	Dudelange
B083-160719-02	B083	Bird	Falco	C. jejuni	383	ST-283 complex	4	7	12	4	42	51	1	251	1	73	B083-160719-02.fasta	TRUE	2019-07-15T00:00:00Z	Dudelange
B086-160719-01	B086	Bird	Columba	C. jejuni	383	ST-283 complex	4	7	12	4	42	51	1	251	1	73	B086-160719-01.fasta	TRUE	2019-07-15T00:00:00Z	Dudelange
B096-300719-02	B096	Bird	Corvus corone	C. jejuni	951	?	18	100	82	24	138	116	63	2277	31	2358	B096-300719-02.fasta	TRUE	2019-07-30T00:00:00Z	Dudelange
B100-300719-01	B100	Bird	Apus apus	C. jejuni	383	ST-283 complex	4	7	12	4	42	51	1	251	1	73	B100-300719-01.fasta	TRUE	2019-07-30T00:00:00Z	Dudelange
B100-300719-02	B100	Bird	Apus apus	C. jejuni	475	ST-48 complex	2	4	1	4	19	62	5	827	5	67	B100-300719-02.fasta	TRUE	2019-07-30T00:00:00Z	Dudelange
B103-300719-02	B103	Bird	Turdus	C. jejuni	177	ST-177 complex	17	2	8	5	8	2	4	2172	31	236	B103-300719-02.fasta	TRUE	2019-07-30T00:00:00Z	Dudelange
B112-130819-01	B112	Bird	Corvus corone	C. jejuni	7882	?	64	583	22	111	122	303	16	2599	36	2357	B112-130819-01.fasta	TRUE	2019-08-13T00:00:00Z	Dudelange
B114-130819-01	B114	Bird	Turdus	C. jejuni	10810	?	94	117	90	125	1094	147	100	2173	101	2355	B114-130819-01.fasta	TRUE	2019-08-13T00:00:00Z	Dudelange
B114-130819-03	B114	Bird	Turdus	C. jejuni	1277	?	96	135	99	136	183	140	113	2600	105	2359	B114-130819-03.fasta	TRUE	2019-08-13T00:00:00Z	Dudelange
B119-270819-01	B119	Bird	Pica pica	C. jejuni	11004	?	15	33	72	875	753	103	16	2601	106	1772	B119-270819-01.fasta	TRUE	2019-08-27T00:00:00Z	Dudelange
B121-270819-02	B121	Bird	Corvus corone	C. jejuni	6591	?	64	105	20	77	94	103	16	2602	11	1634	B121-270819-02.fasta	TRUE	2019-08-27T00:00:00Z	Dudelange
B122-270819-02	B122	Bird	Buteo	C. jejuni	19	ST-21 complex	2	1	5	3	2	1	5	2165	8	327	B122-270819-02.fasta	TRUE	2019-08-27T00:00:00Z	Dudelange
B123-270819-01	B123	Bird	Falco	C. jejuni	19	ST-21 complex	2	1	5	3	2	1	5	2165	8	327	B123-270819-01.fasta	TRUE	2019-08-27T00:00:00Z	Dudelange
B158-221019-01	B158	Bird	Corvus corone	C. jejuni	5846	?	76	105	72	104	124	96	31	2304	40	858	B158-221019-01.fasta	TRUE	2019-10-22T00:00:00Z	Dudelange
B167-230720-01	B167	Bird	Apus apus	C. jejuni	1044	ST-658	2	10	2	4	19	3	6	84	27	25	B167-230720-01.fasta	TRUE	2020-07-23T00:00:00Z	Dudelange
B189-130820-01	B189	Bird	Turdus	C. jejuni	8614	ST-1332	2	1	4	28	58	672	58	2612	36	6	B189-130820-01.fasta	TRUE	2020-08-13T00:00:00Z	Dudelange
B190-130820-01	B190	Bird	Turdus	C. jejuni	11	ST-45	48	7	10	4	1	7	1	414	7	217	B190-130820-01.fasta	TRUE	2020-08-13T00:00:00Z	Dudelange
B193-200820-02	B193	Bird	Anas	C. jejuni	5207	NA	37	187	4	28	19	24	23	2614	51	2356	B193-200820-02.fasta	TRUE	2020-08-20T00:00:00Z	Wasserbillig
B194-200820-01	B194	Bird	Alopochen aegyptiacus	C. jejuni	8614	ST-1332	2	1	4	28	58	672	58	2612	36	6	B194-200820-01.fasta	TRUE	2020-08-20T00:00:00Z	Wasserbillig
B198-200820-01	B198	Bird	Alopochen aegyptiacus	C. jejuni	11	ST-45	48	7	10	4	1	7	1	414	7	217	B198-200820-01.fasta	TRUE	2020-08-20T00:00:00Z	Wasserbillig
B203-270820-01	B203	Bird	Corvus corone	C. jejuni	11385	?	4	43	9	5	8	46	21	3163	80	203	B203-270820-01.fasta	TRUE	2020-08-27T00:00:00Z	Dudelange
B203-270820-02	B203	Bird	Corvus corone	C. jejuni	11381	?	577	2	397	91	884	748	51	3164	109	2368	B203-270820-02.fasta	TRUE	2020-08-27T00:00:00Z	Dudelange
B203-270820-04	B203	Bird	Corvus corone	C. jejuni	677	ST-677 complex	10	81	50	99	120	76	52	36	19	276	B203-270820-04.fasta	TRUE	2020-08-27T00:00:00Z	Dudelange
B221-240920-01	B221	Bird	Alopochen aegyptiacus	C. jejuni	1294	?	2	59	96	48	131	24	57	2460	13	152	B221-240920-01.fasta	TRUE	2020-09-24T00:00:00Z	Wasserbillig
B250-060321-01	B250	Bird	Emberiza citrinella	C. jejuni	11376	?	578	143	116	151	198	189	33	3165	108	2370	B250-060321-01.fasta	TRUE	2021-03-06T00:00:00Z	Uerbersyren
B251-060321-01	B251	Bird	Emberiza citrinella	C. jejuni	11376	?	578	143	116	151	198	189	33	3165	108	2370	B251-060321-01.fasta	TRUE	2021-03-06T00:00:00Z	Uerbersyren
B266-270321-01	B266	Bird	Sylvia atricapilla	C. jejuni	6313	?	323	439	384	483	611	512	371	3166	107	2369	B266-270321-01.fasta	TRUE	2021-03-27T00:00:00Z	Uerbersyren
B284-140421-02	B284	Bird	Sylvia atricapilla	C. jejuni	11413	?	95	795	671	892	1137	872	717	3257	22	2371	B284-140421-02.fasta	TRUE	2021-04-14T00:00:00Z	Uerbersyren
B285-140421-02	B285	Bird	Sylvia atricapilla	C. jejuni	1316	?	95	2	94	127	181	144	110	3167	74	463	B285-140421-02.fasta	TRUE	2021-04-14T00:00:00Z	Uerbersyren
B288-140421-02	B288	Bird	Sylvia atricapilla	C. jejuni	6313	?	323	439	384	483	611	512	371	3168	107	2369	B288-140421-02.fasta	TRUE	2021-04-14T00:00:00Z	Uerbersyren
B299-140421-01	B299	Bird	Sylvia atricapilla	C. jejuni	6313	?	323	439	384	483	611	512	371	3168	107	2369	B299-140421-01.fasta	TRUE	2021-04-14T00:00:00Z	Uerbersyren
B300-140421-01	B300	Bird	Sylvia atricapilla	C. jejuni	1080	?	10	2	107	137	120	76	1	3169	74	130	B300-140421-01.fasta	TRUE	2021-04-14T00:00:00Z	Uerbersyren
B302-140421-01	B302	Bird	Sylvia atricapilla	C. jejuni	6313	?	323	439	384	483	611	512	371	3168	107	2369	B302-140421-01.fasta	TRUE	2021-04-14T00:00:00Z	Uerbersyren
B303-140421-01	B303	Bird	Emberiza citrinella	C. jejuni	11376	?	578	143	116	151	198	189	33	3165	108	2370	B303-140421-01.fasta	TRUE	2021-04-14T00:00:00Z	Uerbersyren
B308-140421-01	B308	Bird	Emberiza citrinella	C. jejuni	11376	?	578	143	116	151	198	189	33	3165	108	2370	B308-140421-01.fasta	TRUE	2021-04-14T00:00:00Z	Uerbersyren
B318-050521-01	B318	Bird	Asio otus	C. jejuni	45	ST-45 complex	4	7	10	4	1	7	1	2042	7	49	B318-050521-01.fasta	TRUE	2021-05-05T00:00:00Z	Dudelange
B320-050521-02	B320	Bird	Pica pica	C. jejuni	4570	?	64	22	20	100	242	204	16	3170	37	1795	B320-050521-02.fasta	TRUE	2021-05-05T00:00:00Z	Dudelange
B321-050521-01	B321	Bird	Pica pica	C. jejuni	11383	?	64	33	78	18	1136	86	16	3171	11	1598	B321-050521-01.fasta	TRUE	2021-05-05T00:00:00Z	Dudelange
B325-250521-01	B325	Bird	Corvus monedula	C. jejuni	563	ST-177 complex	17	5	8	5	8	2	4	3172	31	909	B325-250521-01.fasta	TRUE	2021-05-25T00:00:00Z	Dudelange
B326-250521-01	B326	Bird	Corvus monedula	C. jejuni	4570	?	64	22	20	100	242	204	16	3170	37	1795	B326-250521-01.fasta	TRUE	2021-05-25T00:00:00Z	Dudelange
B327-250521-01	B327	Bird	Corvus corone	C. jejuni	11382	?	80	70	164	98	123	229	16	3173	31	1468	B327-250521-01.fasta	TRUE	2021-05-25T00:00:00Z	Dudelange
B328-250521-02	B328	Bird	Corvus corone	C. jejuni	6386	?	64	95	20	100	514	301	60	3174	36	406	B328-250521-02.fasta	TRUE	2021-05-25T00:00:00Z	Dudelange
B329-250521-01	B329	Bird	Turdus	C. jejuni	677	ST-677 complex	10	81	50	99	120	76	52	36	19	276	B329-250521-01.fasta	TRUE	2021-05-25T00:00:00Z	Dudelange
B330-250521-01	B330	Bird	Sturnus	C. jejuni	677	ST-677 complex	10	81	50	99	120	76	52	2070	19	276	B330-250521-01.fasta	TRUE	2021-05-25T00:00:00Z	Dudelange
B331-250521-01	B331	Bird	Parus major	C. jejuni	45	ST-45 complex	4	7	10	4	1	7	1	297	7	49	B331-250521-01.fasta	TRUE	2021-05-25T00:00:00Z	Dudelange
B333-250521-01	B333	Bird	Turdus	C. jejuni	11377	?	98	122	98	891	180	150	113	3175	101	970	B333-250521-01.fasta	TRUE	2021-05-25T00:00:00Z	Dudelange
B335-070621-01	B335	Bird	Corvus monedula	C. jejuni	11584	?	64	22	20	189	134	94	16	3258	11	2372	B335-070621-01.fasta	TRUE	2021-06-07T00:00:00Z	Dudelange
B336-070621-01	B336	Bird	Corvus monedula	C. jejuni	11379	?	64	226	203	189	652	54	16	3176	11	2367	B336-070621-01.fasta	TRUE	2021-06-07T00:00:00Z	Dudelange
B336-070621-02	B336	Bird	Corvus monedula	C. jejuni	1481	?	35	5	9	5	8	2	2	3177	31	1836	B336-070621-02.fasta	TRUE	2021-06-07T00:00:00Z	Dudelange
B337-070621-01	B337	Bird	Pica pica	C. jejuni	1044	ST-658 complex	2	10	2	4	19	3	6	84	27	25	B337-070621-01.fasta	TRUE	2021-06-07T00:00:00Z	Dudelange
B338-070621-02	B338	Bird	Corvus monedula	C. jejuni	11379	?	64	226	203	189	652	54	16	3178	11	2367	B338-070621-02.fasta	TRUE	2021-06-07T00:00:00Z	Dudelange
B339-070621-01	B339	Bird	Corvus corone	C. jejuni	267	ST-283 complex	4	7	40	4	42	51	1	1407	1	73	B339-070621-01.fasta	TRUE	2021-06-07T00:00:00Z	Dudelange
B342-070621-01	B342	Bird	Dendocopos	C. jejuni	19	ST-21 complex	2	1	5	3	2	1	5	82	8	7	B342-070621-01.fasta	TRUE	2021-06-07T00:00:00Z	Dudelange
B345-080621-01	B345	Bird	Prunella modularis	C. jejuni	383	ST-283 complex	4	7	12	4	42	51	1	251	1	73	B345-080621-01.fasta	TRUE	2021-06-07T00:00:00Z	Uerbersyren
B353-210621-01	B353	Bird	Corvus monedula	C. jejuni	448	?	61	70	22	18	2	74	47	2506	31	639	B353-210621-01.fasta	TRUE	2021-06-21T00:00:00Z	Dudelange
B354-210621-01	B354	Bird	Garrulus	C. jejuni	2162	?	35	43	8	51	8	2	21	3179	7	634	B354-210621-01.fasta	TRUE	2021-06-21T00:00:00Z	Dudelange
B355-210621-01	B355	Bird	Fringilla	C. jejuni	267	ST-283 complex	4	7	40	4	42	51	1	2744	1	73	B355-210621-01.fasta	TRUE	2021-06-21T00:00:00Z	Dudelange
B357-210621-01	B357	Bird	Corvus monedula	C. jejuni	11378	?	35	5	8	51	8	2	21	3180	7	1621	B357-210621-01.fasta	TRUE	2021-06-21T00:00:00Z	Dudelange
B358-210621-01	B358	Bird	Turdus	C. jejuni	11	ST-45 complex	48	7	10	4	1	7	1	3181	7	217	B358-210621-01.fasta	TRUE	2021-06-21T00:00:00Z	Dudelange
B361-210621-01	B361	Bird	Turdus	C. jejuni	230	ST-45 complex	4	7	41	4	42	7	1	2282	1	217	B361-210621-01.fasta	TRUE	2021-06-21T00:00:00Z	Dudelange
B362-210621-01	B362	Bird	Turdus	C. jejuni	267	ST-283 complex	4	7	40	4	42	51	1	2744	1	73	B362-210621-01.fasta	TRUE	2021-06-21T00:00:00Z	Dudelange
B364-210621-01	B364	Bird	Pica pica	C. jejuni	11380	?	18	33	72	98	116	871	6	3182	11	200	B364-210621-01.fasta	TRUE	2021-06-21T00:00:00Z	Dudelange
W021-240919-01	W021	Surface water	Moselle	C. jejuni	704	?	2	29	4	27	10	25	57	2604	13	886	W021-240919-01.fasta	TRUE	2019-09-12T00:00:00Z	Moselle (Wasserbillig)
W025-02122019-02	W025	Surface water	Alzette	C. jejuni	11466	?	18	33	649	325	116	104	6	2278	100	2349	W025-02122019-02.fasta	TRUE	2019-12-02T00:00:00Z	Alzette Hesperange Amont step
W052-240920-02	W052	Surface water	Sûre	C. jejuni	991	ST-692 complex	37	52	57	26	107	29	23	2620	4	6	W052-240920-02.fasta	TRUE	2020-09-24T00:00:00Z	Sûre (Wasserbillig)
W087-210621-01	W087	Surface water	Alzette	C. jejuni	10102	?	64	22	203	100	134	160	60	3184	11	2366	W087-210621-01.fasta	TRUE	2021-06-21T00:00:00Z	Alzette Hesperange Amont step
B024-230519-01	B024	Bird	Turdus	C. jejuni	1080	NA	10	2	107	137	120	76	1	2300	74	130	B024-230519-01.fasta	FALSE	2019-05-23T00:00:00Z	Dudelange
B033-110619-01	B033	Bird	Sturnus	C. jejuni	448	?	61	70	22	18	2	74	47	2624	31	860	B033-110619-01.fasta	FALSE	2019-06-11T00:00:00Z	Dudelange
B040F-110619-01	B040	Bird	Pica pica	C. jejuni	11002	?	258	174	207	193	336	314	131	2625	99	2347	B040F-110619-01.fasta	FALSE	2019-06-11T00:00:00Z	Dudelange
B041-110619-02	B041	Bird	Corvus corone	C. jejuni	4279	ST-1275 complex	27	22	22	376	43	86	31	2163	31	1638	B041-110619-02.fasta	FALSE	2019-06-11T00:00:00Z	Dudelange
B042-110619-01	B042	Bird	Corvus corone	C. jejuni	11003	?	64	779	68	98	1	17	16	2626	36	127	B042-110619-01.fasta	FALSE	2019-06-11T00:00:00Z	Dudelange
B042F-110619-01	B042	Bird	Corvus corone	C. jejuni	1282	?	64	162	20	100	194	101	60	2164	11	2350	B042F-110619-01.fasta	FALSE	2019-06-11T00:00:00Z	Dudelange
B046-180619-01	B046	Bird	Turdus	C. jejuni	677	ST-677 complex	10	81	50	99	120	76	52	38	19	276	B046-180619-01.fasta	FALSE	2019-06-18T00:00:00Z	Dudelange
B053-180619-01	B053	Bird	Corvus monedula	C. jejuni	10813	?	64	22	148	100	94	187	16	2627	11	2351	B053-180619-01.fasta	FALSE	2019-06-18T00:00:00Z	Dudelange
B070-020719-01	B070	Bird	Turdus	C. jejuni	45	ST-45 complex	4	7	10	4	1	7	1	2171	7	44	B070-020719-01.fasta	FALSE	2019-07-02T00:00:00Z	Dudelange
B072-020719-02	B072	Bird	Corvus corone	C. jejuni	45	ST-45 complex	4	7	10	4	1	7	1	2171	7	44	B072-020719-02.fasta	FALSE	2019-07-02T00:00:00Z	Dudelange
B073-020719-02	B073	Bird	Corvus corone	C. jejuni	3536	?	64	22	20	100	134	160	16	2169	104	391	B073-020719-02.fasta	FALSE	2019-07-02T00:00:00Z	Dudelange
B097-300719-02	B097	Bird	Corvus monedula	C. jejuni	801	?	64	70	68	97	122	106	16	2598	36	127	B097-300719-02.fasta	FALSE	2019-07-30T00:00:00Z	Dudelange
B102-300719-02	B102	Bird	Turdus	C. jejuni	583	ST-45 complex	4	7	10	4	42	51	1	459	1	73	B102-300719-02.fasta	FALSE	2019-07-30T00:00:00Z	Dudelange
B104-300719-01	B104	Bird	Turdus	C. jejuni	177	ST-177 complex	17	2	8	5	8	2	4	2172	31	236	B104-300719-01.fasta	FALSE	2019-07-30T00:00:00Z	Dudelange
B108-130819-01	B108	Bird	Falco	C. jejuni	19	ST-21 complex	2	1	5	3	2	1	5	2165	8	327	B108-130819-01.fasta	FALSE	2019-08-13T00:00:00Z	Dudelange
B113-130819-01	B113	Bird	Corvus corone	C. jejuni	801	?	64	70	68	97	122	106	16	2598	36	127	B113-130819-01.fasta	FALSE	2019-08-13T00:00:00Z	Dudelange
B113-130819-02	B113	Bird	Corvus corone	C. jejuni	7836	?	258	174	207	193	336	314	229	2303	99	2347	B113-130819-02.fasta	FALSE	2019-08-13T00:00:00Z	Dudelange
B183-300720-01	B183	Bird	Turdus	C. jejuni	11	ST-45	48	7	10	4	1	7	1	414	7	217	B183-300720-01.fasta	FALSE	2020-07-30T00:00:00Z	Dudelange
B185-300720-01	B185	Bird	Turdus	C. jejuni	11	ST-45	48	7	10	4	1	7	1	414	7	217	B185-300720-01.fasta	FALSE	2020-07-30T00:00:00Z	Dudelange
B208-100920-01	B208	Bird	Corvus monedula	C. jejuni	677	ST-677 complex	10	81	50	99	120	76	52	36	19	276	B208-100920-01.fasta	FALSE	2020-09-10T00:00:00Z	Dudelange
W023-02122019-02	W023	Surface water	Alzette	C. jejuni	538	ST-45 complex	4	7	10	4	42	25	1	1392	7	73	W023-02122019-02.fasta	FALSE	2019-12-02T00:00:00Z	Alzette Huncherange
W028-30012020-01	W028	Surface water	Alzette	C. jejuni	9897	?	2	21	12	62	11	67	6	2279	9	18	W028-30012020-01.fasta	FALSE	2020-01-30T00:00:00Z	Alzette Huncherange
W030-30012020-02	W030	Surface water	Alzette	C. jejuni	9897	?	2	21	12	62	11	67	6	2279	9	18	W030-30012020-02.fasta	FALSE	2020-01-30T00:00:00Z	Alzette Hesperange Aval step
W033-27022020-02	W033	Surface water	Alzette	C. jejuni	4279	ST-1275 complex	27	22	22	376	43	86	31	2280	31	1638	W033-27022020-02.fasta	FALSE	2020-02-27T00:00:00Z	Alzette Hesperange Amont step
W045-270820-05	W045	Surface water	Alzette	C. jejuni	11375	?	48	4	5	62	11	67	1	3183	10	92	W045-270820-05.fasta	FALSE	2020-08-27T00:00:00Z	Alzette Hesperange Amont step

## Sheet: Isolates_Information_IDs
PubMLST ID	ENA Biosample	Strain ID	Strain ID corrected	Sampling date	Sample ID	Sampling type	Bird species/water origin	ST	Complex Type	fn_gyrA	porA	Genotype
112526	SAMEA112151025	B015-230519-01	B015-230519-01	2019-05-23	B015	Bird	Swan	45	2052	7	467	2052-45-7-467
112527	SAMEA112151026	B021-070519-01	B021-070519-01	2019-05-07	B021	Bird	Carrion crow	48	153	3	7	153-48-3-7
112528	SAMEA112151027	B023-070519-01	B023-070519-01	2019-05-07	B023	Bird	Carrion crow	448	2154	102	2353	2154-448-102-2353
112306	SAMEA112151028	B024-230519-01	B024-230519-01	2019-05-23	B024	Bird	Common blackbird	1080	2300	74	130	2300-1080-74-130
112529	SAMEA112151029	B025-070519-02	B025-070519-02	2019-05-07	B025	Bird	Carrion crow	677	942	19	276	942-677-19-276
112530	SAMEA112151030	B026-230519-01	B026-230519-01	2019-05-23	B026	Bird	Eurasian magpie	448	2154	102	2353	2154-448-102-2353
112531	SAMEA112151031	B027-070519-01	B027-070519-01	2019-05-07	B027	Bird	Eurasian magpie	45	2155	7	49	2155-45-7-49
112532	SAMEA112151032	B028-230519-01	B028-230519-01	2019-05-23	B028	Bird	Carrion crow	2491	2156	11	1634	2156-2491-11-1634
112533	SAMEA112151033	B029-110619-02	B029-110619-02	2019-06-11	B029	Bird	Eurasian magpie	448	2624	31	860	2624-448-31-860
112534	SAMEA112151034	B033-110619-01	B033-110619-01	2019-06-11	B033	Bird	Starling	448	2624	31	860	2624-448-31-860
112535	SAMEA112151035	B036-110619-01	B036-110619-01	2019-06-11	B036	Bird	Western jackdaw	1540	2157	40	860	2157-1540-40-860
112537	SAMEA112151036	B036-110619-03	B036-110619-03	2019-06-11	B036	Bird	Western jackdaw	10813	2157	11	2351	2157-10813-11-2351
112538	SAMEA112151037	B037-110619-01	B037-110619-01	2019-06-11	B037	Bird	Western jackdaw	45	2158	7	49	2158-45-7-49
112539	SAMEA112151038	B038-110619-01	B038-110619-01	2019-06-11	B038	Bird	Western jackdaw	10818	2159	104	391	2159-10818-104-391
112540	SAMEA112151039	B038-110619-02	B038-110619-02	2019-06-11	B038	Bird	Western jackdaw	10811	2160	36	1279	2160-10811-36-1279
112541	SAMEA112151040	B038-110619-03	B038-110619-03	2019-06-11	B038	Bird	Western jackdaw	10817	2161	103	2354	2161-10817-103-2354
112542	SAMEA112151041	B039-110619-03	B039-110619-03	2019-06-11	B039	Bird	Western jackdaw	10820	2162	11	1224	2162-10820-11-1224
112543	SAMEA112151042	B040F-110619-01	B040F-110619-01	2019-06-11	B040	Bird	Eurasian magpie	11002	2625	99	2347	2625-11002-99-2347
112544	SAMEA112151043	B041-110619-02	B041-110619-02	2019-06-11	B041	Bird	Carrion crow	4279	2163	31	1638	2163-4279-31-1638
112545	SAMEA112151044	B042-110619-01	B042-110619-01	2019-06-11	B042	Bird	Carrion crow	11003	2626	36	127	2626-11003-36-127
112546	SAMEA112151045	B042F-110619-01	B042F-110619-01	2019-06-11	B042	Bird	Carrion crow	1282	2164	11	2350	2164-1282-11-2350
112547	SAMEA112151046	B045-180619-01	B045-180619-01	2019-06-18	B045	Bird	Western jackdaw	464	596	3	2348	596-464-3-2348
112548	SAMEA112151047	B046-180619-01	B046-180619-01	2019-06-18	B046	Bird	Common blackbird	677	38	19	276	38-677-19-276
112549	SAMEA112151048	B047-180619-01	B047-180619-01	2019-06-18	B047	Bird	Falcon	19	2165	8	327	2165-19-8-327
112550	SAMEA112151049	B050-180619-01	B050-180619-01	2019-06-18	B050	Bird	Western jackdaw	10813	2166	11	2351	2166-10813-11-2351
112551	SAMEA112151050	B050-180619-02	B050-180619-02	2019-06-18	B050	Bird	Western jackdaw	1080	2301	74	130	2301-1080-74-130
112552	SAMEA112151051	B051-180619-02	B051-180619-02	2019-06-18	B051	Bird	Carrion crow	10815	2167	11	479	2167-10815-11-479
112553	SAMEA112151052	B052-180619-01	B052-180619-01	2019-06-18	B052	Bird	Western jackdaw	7815	2168	11	2352	2168-7815-11-2352
112317	SAMEA112151053	B053-180619-01	B053-180619-01	2019-06-18	B053	Bird	Western jackdaw	10813	2627	11	2351	2627-10813-11-2351
112554	SAMEA112151054	B054-180619-01	B054-180619-01	2019-06-18	B054	Bird	Carrion crow	3536	2169	104	391	2169-3536-104-391
112555	SAMEA112151055	B054-180619-02	B054-180619-02	2019-06-18	B054	Bird	Carrion crow	801	2598	36	127	2598-801-36-127
111041	SAMEA112151056	B063-020719-01	B063-020719-01	2019-07-02	B063	Bird	Common swift	11384	2170	31	236	2170-11384-31-236
112556	SAMEA112151057	B063-020719-02	B063-020719-02	2019-07-02	B063	Bird	Common swift	22	277	8	70	277-22-8-70
112557	SAMEA112151058	B067-020719-01	B067-020719-01	2019-07-02	B067	Bird	Eurasian magpie	383	251	1	73	251-383-1-73
112558	SAMEA112151059	B068-020719-02	B068-020719-02	2019-07-02	B068	Bird	Eurasian magpie	383	251	1	73	251-383-1-73
112559	SAMEA112151060	B070-020719-01	B070-020719-01	2019-07-02	B070	Bird	Common blackbird	45	2171	7	44	2171-45-7-44
112560	SAMEA112151061	B071-020719-01	B071-020719-01	2019-07-02	B071	Bird	Carrion crow	45	2171	7	44	2171-45-7-44
112561	SAMEA112151062	B072-020719-02	B072-020719-02	2019-07-02	B072	Bird	Carrion crow	45	2171	7	44	2171-45-7-44
112562	SAMEA112151063	B073-020719-02	B073-020719-02	2019-07-02	B073	Bird	Carrion crow	3536	2169	104	391	2169-3536-104-391
112563	SAMEA112151064	B083-160719-02	B083-160719-02	2019-07-16	B083	Bird	Falcon	383	251	1	73	251-383-1-73
112564	SAMEA112151065	B086-160719-01	B086-160719-01	2019-07-16	B086	Bird	Pigeon	383	251	1	73	251-383-1-73
112565	SAMEA112151066	B096-300719-02	B096-300719-02	2019-07-30	B096	Bird	Carrion crow	951	2277	31	2358	2277-951-31-2358
112566	SAMEA112151067	B097-300719-02	B097-300719-02	2019-07-30	B097	Bird	Western jackdaw	801	2598	36	127	2598-801-36-127
112567	SAMEA112151068	B100-300719-01	B100-300719-01	2019-07-30	B100	Bird	Common swift	383	251	1	73	251-383-1-73
112568	SAMEA112151069	B100-300719-02	B100-300719-02	2019-07-30	B100	Bird	Common swift	475	827	5	67	827-475-5-67
112569	SAMEA112151070	B102-300719-02	B102-300719-02	2019-07-30	B102	Bird	Common blackbird	583	459	1	73	459-583-1-73
112570	SAMEA112151071	B103-300719-02	B103-300719-02	2019-07-30	B103	Bird	Common blackbird	177	2172	31	236	2172-177-31-236
112571	SAMEA112151072	B104-300719-01	B104-300719-01	2019-07-30	B104	Bird	Common blackbird	177	2172	31	236	2172-177-31-236
112572	SAMEA112151073	B108-130819-01	B108-130819-01	2019-08-13	B108	Bird	Falcon	19	2165	8	327	2165-19-8-327
112573	SAMEA112151074	B112-130819-01	B112-130819-01	2019-08-13	B112	Bird	Carrion crow	7882	2599	36	2357	2599-7882-36-2357
112574	SAMEA112151075	B113-130819-01	B113-130819-01	2019-08-13	B113	Bird	Carrion crow	801	2598	36	127	2598-801-36-127
112575	SAMEA112151076	B113-130819-02	B113-130819-02	2019-08-13	B113	Bird	Carrion crow	7836	2303	99	2347	2303-7836-99-2347
112576	SAMEA112151077	B114-130819-01	B114-130819-01	2019-08-13	B114	Bird	Common blackbird	10810	2173	101	2355	2173-10810-101-2355
112577	SAMEA112151078	B114-130819-03	B114-130819-03	2019-08-13	B114	Bird	Common blackbird	1277	2600	105	2359	2600-1277-105-2359
112578	SAMEA112151079	B119-270819-01	B119-270819-01	2019-08-27	B119	Bird	Eurasian magpie	11004	2601	106	1772	2601-11004-106-1772
112579	SAMEA112151080	B121-270819-02	B121-270819-02	2019-08-27	B121	Bird	Carrion crow	6591	2602	11	1634	2602-6591-11-1634
112580	SAMEA112151081	B122-270819-02	B122-270819-02	2019-08-27	B122	Bird	Common buzzard	19	2165	8	327	2165-19-8-327
112581	SAMEA112151082	B123-270819-01	B123-270819-01	2019-08-27	B123	Bird	Falcon	19	2165	8	327	2165-19-8-327
112583	SAMEA112151083	B158-221019-01	B158-221019-01	2019-10-22	B158	Bird	Carrion crow	5846	2304	40	858	2304-5846-40-858
112584	SAMEA112151084	B167-230720-01	B167-230720-01	2020-07-23	B167	Bird	Common swift	1044	84	27	25	84-1044-27-25
112585	SAMEA112151085	B183-300720-01	B183-300720-01	2020-07-30	B183	Bird	Common blackbird	11	414	7	217	414-11-7-217
112586	SAMEA112151086	B185-300720-01	B185-300720-01	2020-07-30	B185	Bird	Common blackbird	11	414	7	217	414-11-7-217
112587	SAMEA112151087	B189-130820-01	B189-130820-01	2020-08-13	B189	Bird	Common blackbird	8614	2612	36	6	2612-8614-36-6
112588	SAMEA112151088	B190-130820-01	B190-130820-01	2020-08-13	B190	Bird	Common blackbird	11	414	7	217	414-11-7-217
112590	SAMEA112151089	B193-200820-02	B193-200820-02	2020-08-20	B193	Bird	Duck	5207	2614	51	2356	2614-5207-51-2356
112591	SAMEA112151090	B194-200820-01	B194-200820-01	2020-08-20	B194	Bird	Egyptian goose	8614	2612	36	6	2612-8614-36-6
112592	SAMEA112151091	B198-200820-01	B198-200820-01	2020-08-20	B198	Bird	Egyptian goose	11	414	7	217	414-11-7-217
111042	SAMEA112151092	B203-270820-01	B203-270820-01	2020-08-27	B203	Bird	Carrion crow	11385	3163	80	203	3163-11385-80-203
111038	SAMEA112151093	B203-270820-02	B203-270820-02	2020-08-27	B203	Bird	Carrion crow	11381	3164	109	2368	3164-11381-109-2368
112593	SAMEA112151094	B203-270820-04	B203-270820-04	2020-08-27	B203	Bird	Carrion crow	677	36	19	276	36-677-19-276
112594	SAMEA112151095	B208-100920-01	B208-100920-01	2020-09-10	B208	Bird	Western jackdaw	677	36	19	276	36-677-19-276
112595	SAMEA112151096	B221-240920-01	B221-240920-01	2020-09-24	B221	Bird	Egyptian goose	1294	2460	13	152	2460-1294-13-152
111033	SAMEA112151097	B250-060321-01	B250-060321-01	2021-03-06	B250	Bird	Yellowhammer	11376	3165	108	2370	3165-11376-108-2370
112596	SAMEA112151098	B251-060321-01	B251-060321-01	2021-03-06	B251	Bird	Yellowhammer	11376	3165	108	2370	3165-11376-108-2370
112597	SAMEA112151099	B266-270321-01	B266-270321-01	2021-03-27	B266	Bird	Eurasian blackcap	6313	3166	107	2369	3166-6313-107-2369
112598	SAMEA112151100	B284-140421-02	B284-140421-02	2021-04-14	B284	Bird	Eurasian blackcap	11413	3257	22	2371	3257-11413-22-2371
112599	SAMEA112151101	B285-140421-02	B285-140421-02	2021-04-14	B285	Bird	Eurasian blackcap	1316	3167	74	463	3167-1316-74-463
112600	SAMEA112151102	B288-140421-02	B288-140421-02	2021-04-14	B288	Bird	Eurasian blackcap	6313	3168	107	2369	3168-6313-107-2369
112601	SAMEA112151103	B299-140421-01	B299-140421-01	2021-04-14	B299	Bird	Eurasian blackcap	6313	3168	107	2369	3168-6313-107-2369
112602	SAMEA112151104	B300-140421-01	B300-140421-01	2021-04-14	B300	Bird	Eurasian blackcap	1080	3169	74	130	3169-1080-74-130
112603	SAMEA112151105	B302-140421-01	B302-140421-01	2021-04-14	B302	Bird	Eurasian blackcap	6313	3168	107	2369	3168-6313-107-2369
112604	SAMEA112151106	B303-140421-01	B303-140421-01	2021-04-14	B303	Bird	Yellowhammer	11376	3165	108	2370	3165-11376-108-2370
112605	SAMEA112151107	B308-140421-01	B308-140421-01	2021-04-14	B308	Bird	Yellowhammer	11376	3165	108	2370	3165-11376-108-2370
112606	SAMEA112151108	B318-050521-01	B318-050521-01	2021-05-05	B318	Bird	Long-eared owl	45	2042	7	49	2042-45-7-49
112607	SAMEA112151109	B320-050521-02	B320-050521-02	2021-05-05	B320	Bird	Eurasian magpie	4570	3170	37	1795	3170-4570-37-1795
111040	SAMEA112151110	B321-050521-01	B321-050521-01	2021-05-05	B321	Bird	Eurasian magpie	11383	3171	11	1598	3171-11383-11-1598
112608	SAMEA112151111	B325-250521-01	B325-250521-01	2021-05-25	B325	Bird	Western jackdaw	563	3172	31	909	3172-563-31-909
112609	SAMEA112151112	B326-250521-01	B326-250521-01	2021-05-25	B326	Bird	Western jackdaw	4570	3170	37	1795	3170-4570-37-1795
111039	SAMEA112151113	B327-250521-01	B327-250521-01	2021-05-25	B327	Bird	Carrion crow	11382	3173	31	1468	3173-11382-31-1468
112610	SAMEA112151114	B328-250521-02	B328-250521-02	2021-05-25	B328	Bird	Carrion crow	6386	3174	36	406	3174-6386-36-406
112611	SAMEA112151115	B329-250521-01	B329-250521-01	2021-05-25	B329	Bird	Common blackbird	677	36	19	276	36-677-19-276
112612	SAMEA112151116	B330-250521-01	B330-250521-01	2021-05-25	B330	Bird	Starling	677	2070	19	276	2070-677-19-276
112613	SAMEA112151117	B331-250521-01	B331-250521-01	2021-05-25	B331	Bird	Great tit	45	297	7	49	297-45-7-49
111034	SAMEA112151118	B333-250521-01	B333-250521-01	2021-05-25	B333	Bird	Common blackbird	11377	3175	101	970	3175-11377-101-970
111298	SAMEA112151119	B335-070621-01	B335-070621-01	2021-06-07	B335	Bird	Western jackdaw	11584	3258	11	2372	3258-11584-11-2372
112614	SAMEA112151120	B336-070621-01	B336-070621-01	2021-06-07	B336	Bird	Western jackdaw	11379	3176	11	2367	3176-11379-11-2367
112615	SAMEA112151121	B336-070621-02	B336-070621-02	2021-06-07	B336	Bird	Western jackdaw	1481	3177	31	1836	3177-1481-31-1836
112944	SAMEA112151122	B337-070621-01	B337-070621-01	2021-06-07	B337	Bird	Eurasian magpie	1044	84	27	25	84-1044-27-25
111036	SAMEA112151123	B338-070621-02	B338-070621-02	2021-06-07	B338	Bird	Western jackdaw	11379	3178	11	2367	3178-11379-11-2367
112616	SAMEA112151124	B339-070621-01	B339-070621-01	2021-06-07	B339	Bird	Carrion crow	267	1407	1	73	1407-267-1-73
112617	SAMEA112151125	B342-070621-01	B342-070621-01	2021-06-07	B342	Bird	Great spotted woodpecker	19	82	8	7	82-19-8-7
112618	SAMEA112151126	B345-080621-01	B345-080621-01	2021-06-08	B345	Bird	Dunnock	383	251	1	73	251-383-1-73
112619	SAMEA112151127	B353-210621-01	B353-210621-01	2021-06-21	B353	Bird	Western jackdaw	448	2506	31	639	2506-448-31-639
112620	SAMEA112151128	B354-210621-01	B354-210621-01	2021-06-21	B354	Bird	Eurasian jay	2162	3179	7	634	3179-2162-7-634
112621	SAMEA112151129	B355-210621-01	B355-210621-01	2021-06-21	B355	Bird	Common chaffinch	267	2744	1	73	2744-267-1-73
111035	SAMEA112151130	B357-210621-01	B357-210621-01	2021-06-21	B357	Bird	Western jackdaw	11378	3180	7	1621	3180-11378-7-1621
112622	SAMEA112151131	B358-210621-01	B358-210621-01	2021-06-21	B358	Bird	Common blackbird	11	3181	7	217	3181-11-7-217
112623	SAMEA112151132	B361-210621-01	B361-210621-01	2021-06-21	B361	Bird	Common blackbird	230	2282	1	217	2282-230-1-217
112624	SAMEA112151133	B362-210621-01	B362-210621-01	2021-06-21	B362	Bird	Common blackbird	267	2744	1	73	2744-267-1-73
111037	SAMEA112151134	B364-210621-01	B364-210621-01	2021-06-21	B364	Bird	Eurasian magpie	11380	3182	11	200	3182-11380-11-200
112625	SAMEA112151135	W021-240919-01	W021-240919-01	2019-09-24	W021	Surface water	Moselle	704	2604	13	886	2604-704-13-886
112636	SAMEA112151136	W023-02122019-02	W023-021219-02	2019-12-02	W023	Surface water	Alzette	538	1392	7	73	1392-538-7-73
112638	SAMEA112151137	W025-02122019-02	W025-021219-02	2019-12-02	W025	Surface water	Alzette	11466	2278	100	2349	2278-11466-100-2349
112643	SAMEA112151138	W028-30012020-01	W028-300120-01	2020-01-30	W028	Surface water	Alzette	9897	2279	9	18	2279-9897-9-18
112648	SAMEA112151139	W030-30012020-02	W030-300120-02	2020-01-30	W030	Surface water	Alzette	9897	2279	9	18	2279-9897-9-18
112653	SAMEA112151140	W033-27022020-02	W033-270220-02	2020-02-27	W033	Surface water	Alzette	4279	2280	31	1638	2280-4279-31-1638
111032	SAMEA112151141	W045-270820-05	W045-270820-05	2020-08-27	W045	Surface water	Alzette	11375	3183	10	92	3183-11375-10-92
112673	SAMEA112151142	W052-240920-02	W052-240920-02	2020-09-24	W052	Surface water	Sûre	991	2620	4	6	2620-991-4-6
112745	SAMEA112151143	W087-210621-01	W087-210621-01	2021-06-21	W087	Surface water	Alzette	10102	3184	11	2366	3184-10102-11-2366

## Sheet: bird_characteristics
Origin	Nom.anglais	Order	Family	Type	Food	Food localisation	Urbans areas	Behavior	Famille
Acrocephalus scirpaceus	Reed Warbler	Passeriformes	Acrocephalus	migratory	carnivore	ground	no	solitary	warbler
Aegithalos caudatus	Long-tailed Tit	Passeriformes	Aegithalidae	sedentary	carnivore	ground	urban/agricultural areas	gregarious	songbird
Alcedo Athis	Common Kingfisher	Coraciiformes	Alcedinidae	sedentary	carnivore	water	urban/agricultural areas	solitary	kingfisher
Alopochen aegyptiacus	Egyptian Goose	Anseriformes	Anatidae	sedentary	herbivore	ground	water area	gregarious	ducks
Anas	Duck	Anseriformes	Anatidae	migratory	omnivorous	ground, water	water area	gregarious	ducks
Anser	Goose	Anseriformes	Anatidae	migratory	herbivore	ground	water area	gregarious	ducks
Apus apus	Common Swift	Apodiformes	Apodidae	migratory	carnivore	air	urban area	gregarious	swift
Ardea cinerea Linnaeus	Grey Heron	Pelecaniformes	Ardeidae	sedentary	carnivore	water	water area	gregarious	heron
Asio otus	Long-eared Owl	Strigiformes	Strigidae	sedentary	carnivore	ground	urban/agricultural areas	gregarious	owl
Branta canadensis	Canada Goose	Anseriformes	Anatidae	migratory	herbivore	ground, water	water area	gregarious	ducks
Buteo buteo	Common Buzzard	Accipitriformes	Accipitridae	sedentary	carnivore	ground	agricultural area	solitary	raptor
Certhia brachydactyla	Short-toed Treecreeper	Passeriformes	Certhiidae	sedentary	carnivore	tree	no	solitary	teecreeper
Chen caerulescens	Snow Goose	Anseriformes	Anatidae	migratory	herbivore	ground	water area	gregarious	ducks
Chloris Chloris	European Greenfinch	Passeriformes	Fringillidae	sedentary	herbivore	ground	no	gregarious	finch
Coccothraustes coccothraustes	Hawfinch	Passeriformes	Fringillidae	sedentary	herbivore	tree	no	solitary	finch
Columba	Pigeon	Columbiformes	Columbidae	sedentary	herbivore	ground	urban/agricultural areas	gregarious	pigeon
Corvus corone	Carrion Crow	Passeriformes	Corvidae	sedentary	omnivorous	ground	urban/agricultural areas	gregarious	crow
Corvus monedula	Western Jackdaw	Passeriformes	Corvidae	sedentary	omnivorous	ground	urban/agricultural areas	gregarious	crow
Cyanistes caeruleus	Eurasian Blue Tit	Passeriformes	Paridae	sedentary	carnivore	tree	urban area	gregarious	tit
Cygnus	Swan	Anseriformes	Anatidae	migratory	omnivorous	ground, water	water area	gregarious	ducks
Dendrocopos major	Great Spotted Woodpecker	Piciformes	Picidae	sedentary	omnivorous	tree	urban/agricultural areas	solitary	woodpecker
Emberiza citrinella	Yellowhammer	Passeriformes	Emberizidae	migratory	herbivore	ground	no	gregarious	bunting
Emberiza schoeniclus	Common Reed Bunting	Passeriformes	Emberizidae	sedentary	omnivorous	tree	no	gregarious	bunting
Erithacus rubecula	European Robin	Passeriformes	Muscicapidae	sedentary	carnivore	air	agricultural area	solitary	flycatcher
Falco	Falcon	Falconiformes	Falconidae	sedentary	carnivore	ground	urban/agricultural areas	solitary	raptor
Fringilla coelebs	Common Chaffinch	Passeriformes	Fringillidae	sedentary	omnivorous	ground	urban/agricultural areas	gregarious	finch
Garrulus glandarius	Eurasian Jay	Passeriformes	Corvidae	sedentary	omnivorous	ground	urban/agricultural areas	solitary	crow
Hirundo	Swallow	Passeriformes	Hirundinidae	migratory	carnivore	air	urban/agricultural areas	gregarious	swallow
Linaria	Linnet	Passeriformes	Fringillidae	sedentary	herbivore	ground	no	solitary	finch
Motacilla alba	White Wagtail	Passeriformes	Motacillidae	migratory	carnivore	tree	urban area	gregarious	pipits
Parus major	Great Tit	Passeriformes	Paridae	sedentary	carnivore	foliage	urban/agricultural areas	gregarious	tit
Passer	Sparrow	Passeriformes	Passeridae	sedentary	omnivorous	ground	urban/agricultural areas	gregarious	sparrow
Phylloscopus collybita	Common Chiffchaff	Passeriformes	Phylloscopidae	migratory	carnivore	ground, tree	agricultural area	solitary	warbler
Pica pica	Eurasian Magpie	Passeriformes	Corvidae	sedentary	omnivorous	ground	urban/agricultural areas	gregarious	crow
Picus viridis	European Green Woodpecker	Piciformes	Picidae	sedentary	carnivore	ground	no	solitary	woodpecker
Prunella modularis	Dunnock	Passeriformes	Prunellidae	sedentary	carnivore	ground	urban/agricultural areas	solitary	perching bird
Pyrrhula pyrrhula	Eurasian Bullfinch	Passeriformes	Carduelinae	sedentary	herbivore	tree	urban area	solitary	finch
Remix pendulinis	Eurasian Penduline Tit	Passeriformes	Remizidae	migratory	carnivore	tree		gregarious	tit
sitta	Nuthatch	Passeriformes	Sittidae	sedentary	carnivore	tree		solitary	nuthatch
Sturnus	Starling	Passeriformes	Sturnidae	sedentary	omnivorous	ground	urban/agricultural areas	gregarious	starling
Sylvia atricapilla	Eurasian Blackcap	Passeriformes	Sylviidae	migratory	omnivorous	foliage	urban area	solitary	warbler
Turdus merula	Common blackbird	Passeriformes	Turdidae	sedentary	omnivorous	ground	urban/agricultural areas	gregarious	songbird
