# Supplementary material for: Metagenomic Strain-Typing Combined with Isolate Sequencing Provides Increased Resolution of the Genetic Diversity of Campylobacter jejuni Carriage in Wild Birds
Source: Microorganisms. 2023 Jan 3;11(1):121. doi: 10.3390/microorganisms11010121 (PMC9860660; doi:10.3390/microorganisms11010121)
Supplement: Supplementary file 1 [file microorganisms-11-00121-s001.zip › Supplementary_Data_S2.tsv]

seqID	sampleID	seqtype	mean_length	n_reads	n_pairs	mean_length_trimmed	n_reads_trimmed	n_pairs_trimmed	sampletype	mean_R2	mean_MinDepth	selected_replicate
21-B015	B015	nextseq	145.8504828429872	3331932	1665966	133.97538510832328	3245840	1622920	Bird	NA	NA	FALSE
21-B021	B021	nextseq	147.16038143959614	9070794	4535397	137.9803429706228	8957152	4478576	Bird	0.9922308488918096	607.3333333333334	TRUE
21-B023	B023	nextseq	147.78091521692255	7781718	3890859	137.5856964000156	7691700	3845850	Bird	0.9879966708431576	480	TRUE
21-B025	B025	nextseq	147.49047967159822	19211102	9605551	138.23241341258898	18986998	9493499	Bird	NA	NA	FALSE
21-B026	B026	nextseq	147.73619858596058	7336712	3668356	137.7196363068586	7249958	3624979	Bird	0.987969414606406	450.6666666666667	TRUE
21-B027	B027	nextseq	147.8210961274915	14290272	7145136	138.55356396982552	14125316	7062658	Bird	0.9996398306193982	987.5333333333334	TRUE
21-B028	B028	nextseq	148.099918923208	10762636	5381318	136.67213805941705	10625570	5312785	Bird	NA	NA	FALSE
21-B029	B029	nextseq	146.24337702079487	10642718	5321359	137.32511129645704	10498088	5249044	Bird	0.994427241298376	641.6666666666666	TRUE
21-B035	B035	nextseq	147.4005599733352	9528668	4764334	136.16932892281727	9393912	4696956	Bird	0.9952797682743352	276.3333333333333	TRUE
21-B036	B036	nextseq	147.45774320215594	11089766	5544883	137.70437614323183	10961250	5480625	Bird	NA	NA	FALSE
21-B037	B037	nextseq	90.26349683460126	375940	187970	88.79170406792258	349810	174905	Bird	NA	NA	FALSE
21-B038	B038	nextseq	147.1421671585706	7900594	3950297	137.8990665160212	7801098	3900549	Bird	0.9937104516653998	475	TRUE
21-B039	B039	nextseq	147.19048622831488	14521244	7260622	137.7422131273227	14347480	7173740	Bird	0.994581086480932	863	TRUE
21-B045	B045	nextseq	147.6280097237532	7616812	3808406	137.93475099644988	7528728	3764364	Bird	NA	NA	FALSE
21-B047	B047	nextseq	147.649519696712	16038616	8019308	138.2178374364492	15853074	7926537	Bird	NA	NA	FALSE
21-B050	B050	nextseq	147.4732651756776	12390880	6195440	138.47526641460354	12240320	6120160	Bird	NA	NA	FALSE
21-B051	B051	nextseq	146.57240304847417	12871226	6435613	134.50357741228896	12660548	6330274	Bird	0.9954811227953074	169	TRUE
21-B052	B052	nextseq	146.9360336106326	12476052	6238026	138.19041155028418	12323160	6161580	Bird	0.9960095064282408	549.6666666666666	TRUE
21-B054	B054	nextseq	147.7583114276404	10194458	5097229	138.64932660179932	10076356	5038178	Bird	NA	NA	FALSE
21-B063	B063	nextseq	148.0654703460266	16519540	8259770	138.5603092529169	16335238	8167619	Bird	0.9979061289228082	1141.6666666666667	TRUE
21-B067	B067	nextseq	147.14100578369653	15240772	7620386	137.97635363939668	15054748	7527374	Bird	0.9954010035628436	1015.6666666666666	TRUE
21-B068	B068	nextseq	147.85415496914078	12577446	6288723	138.45706195649728	12433240	6216620	Bird	0.9968702721035396	899.6666666666666	TRUE
21-B071	B071	nextseq	147.37629215193107	8555302	4277651	138.14066969926353	8449524	4224762	Bird	0.9936132099394022	571.3333333333334	TRUE
21-B076	B076	nextseq	148.0593438871951	13689902	6844951	138.13605350264342	13536976	6768488	Bird	0.995260181633722	774.3333333333334	TRUE
21-B077	B077	nextseq	146.5444334468719	14308208	7154104	137.32250797939378	14123880	7061940	Bird	0.9951981493391244	820.3333333333334	TRUE
21-B078	B078	nextseq	147.91078261956704	9438430	4719215	138.1797023178683	9329952	4664976	Bird	0.9971604308231432	513.6666666666666	TRUE
21-B080	B080	nextseq	146.45864448821482	8132338	4066169	137.05320609132298	8022822	4011411	Bird	0.99546720060106475	442.6666666666667	TRUE
21-B082	B082	nextseq	144.48008135839342	20318002	10159001	132.87861741479287	19874276	9937138	Bird	0.99569653196289	270	TRUE
21-B083	B083	nextseq	147.21807366797202	14709676	7354838	137.1750909147272	14516350	7258175	Bird	0.995137834895923	695.3333333333334	TRUE
21-B086	B086	nextseq	147.96276745683477	11756570	5878285	138.0079167187209	11622492	5811246	Bird	0.9958925682104912	304.3333333333333	TRUE
21-B096	B096	nextseq	145.72717798937668	6025236	3012618	137.25891113955603	5937400	2968700	Bird	0.999549569041585	368	TRUE
21-B100	B100	nextseq	147.205868855611	7718302	3859151	137.43336656073083	7622224	3811112	Bird	NA	NA	FALSE
21-B103	B103	nextseq	148.2446843036497	12657796	6328898	137.63292474912672	12509702	6254851	Bird	0.9977772174549936	554	TRUE
21-B112	B112	nextseq	147.2429450190725	8864092	4432046	138.0266420070667	8756022	4378011	Bird	0.9994730765407484	557.6666666666666	TRUE
21-B114	B114	nextseq	147.85901181879402	6441774	3220887	138.1721990841336	6369488	3184744	Bird	0.999131360898474	383.3333333333333	TRUE
21-B119	B119	nextseq	147.75840760637493	12688094	6344047	138.4490140633981	12543910	6271955	Bird	0.9712703337551144	658.6666666666666	TRUE
21-B121	B121	nextseq	147.46953898965475	5108432	2554216	137.8286743791594	5047914	2523957	Bird	0.988423935924642	277	TRUE
21-B122	B122	nextseq	148.15785014880728	13947570	6973785	135.10185856544678	13753188	6876594	Bird	0.992399679799349	46	TRUE
21-B123	B123	nextseq	148.36097054271062	12989722	6494861	138.19477852151607	12852490	6426245	Bird	NA	NA	FALSE
21-B155	B155	nextseq	148.24516768011793	11071080	5535540	138.66047920607056	10950696	5475348	Bird	0.983581456899436	634	TRUE
21-B158	B158	nextseq	146.11555612820217	4377336	2188668	137.0292591184882	4314860	2157430	Bird	0.9805441291388146	256.3333333333333	TRUE
21-B167	B167	nextseq	148.02313503860546	11898316	5949158	134.90207466595496	11735094	5867547	Bird	0.995830881404964	49.333333333333336	TRUE
21-B189	B189	nextseq	147.7368875689682	12809524	6404762	137.86000739191107	12662490	6331245	Bird	NA	NA	FALSE
21-B190	B190	nextseq	147.16553049501675	12102338	6051169	137.7242389583585	11953748	5976874	Bird	0.9799857676606836	733	TRUE
21-B193	B193	nextseq	147.42161648727165	9099286	4549643	137.8169023357384	8991846	4495923	Bird	NA	NA	FALSE
21-B194	B194	nextseq	147.4438340764376	9953740	4976870	137.46929248541136	9836094	4918047	Bird	0.9997559456907904	674	TRUE
21-B198	B198	nextseq	146.26318269851976	5652788	2826394	136.89675881138834	5573696	2786848	Bird	0.9998273028755408	370.3333333333333	TRUE
21-B203	B203	nextseq	147.53286297924274	9675264	4837632	138.49849971460998	9558848	4779424	Bird	0.9942928739042806	662.3333333333334	TRUE
21-B221	B221	nextseq	148.39628351591202	14367504	7183752	136.08150364579774	14190310	7095155	Bird	0.995389698262772	326.3333333333333	TRUE
21-W021	W021	nextseq	148.38441302070345	12126288	6063144	131.64836543158424	11939176	5969588	Water	0.99663755759088	12	TRUE
B015	B015	nextseq	151	32119270	16059635	138.0942427371262	30488620	15244310	Bird	0.9956520733938928	2081.3333333333335	TRUE
B028	B028	nextseq	151	23921848	11960924	139.1274930530034	22693260	11346630	Bird	0.9987729295997908	1421.6666666666667	TRUE
B035	B035	nextseq	151	22412242	11206121	135.41893175822526	21174420	10587210	Bird	NA	NA	FALSE
B036	B036	nextseq	151	22071934	11035967	139.88048369051387	20764848	10382424	Bird	0.9966403858387068	973	TRUE
B037	B037	nextseq	151	24408536	12204268	139.0172228202368	23143248	11571624	Bird	0.9922522405859476	633	TRUE
B038	B038	nextseq	151	10660362	5330181	139.36812266784682	9896970	4948485	Bird	NA	NA	FALSE
B039	B039	nextseq	151	18362426	9181213	137.9712393120563	17367700	8683850	Bird	NA	NA	FALSE
B045	B045	nextseq	151	13612640	6806320	137.6708084095638	12667292	6333646	Bird	0.9896188525057849	750.6666666666666	TRUE
B047	B047	nextseq	151	22935806	11467903	138.37937783399224	21618796	10809398	Bird	0.9896065692256932	1397.3333333333333	TRUE
B050	B050	nextseq	151	22570084	11285042	138.41272704517786	21270106	10635053	Bird	0.994226158313777	1349.6666666666667	TRUE
B051	B051	nextseq	151	23372788	11686394	134.3335793649278	21886078	10943039	Bird	NA	NA	FALSE
B052	B052	nextseq	151	22954706	11477353	137.86183000531545	21687784	10843892	Bird	NA	NA	FALSE
B054	B054	nextseq	151	17556866	8778433	139.45056177298056	16600656	8300328	Bird	0.9996091393827808	1036.3333333333333	TRUE
B071	B071	nextseq	151	1899118	949559	147.28177256226368	1802656	901328	Bird	NA	NA	FALSE
B076	B076	nextseq	151	3480856	1740428	147.20600030402613	3276034	1638017	Bird	NA	NA	FALSE
B077	B077	nextseq	151	2778128	1389064	147.1198479967734	2633102	1316551	Bird	NA	NA	FALSE
B078	B078	nextseq	151	1732652	866326	147.2390620812198	1611824	805912	Bird	NA	NA	FALSE
B082	B082	nextseq	151	1974714	987357	145.57701856643564	1851190	925595	Bird	NA	NA	FALSE
B083	B083	nextseq	151	16416	8208	146.79641185647426	1282	641	Bird	NA	NA	FALSE
B086	B086	nextseq	151	3333238	1666619	146.96827873977566	3134680	1567340	Bird	NA	NA	FALSE
B100	B100	nextseq	151	1329068	664534	147.55915902212175	1240318	620159	Bird	0.9961136441351256	87	TRUE
B103	B103	nextseq	151	1661078	830539	146.91310159569895	1558314	779157	Bird	NA	NA	FALSE
B114	B114	nextseq	151	1333756	666878	146.8699605681142	1247214	623607	Bird	NA	NA	FALSE
B119	B119	nextseq	151	1665520	832760	146.7174996640628	1577676	788838	Bird	NA	NA	FALSE
B121	B121	nextseq	151	1088534	544267	147.31497978366934	1005128	502564	Bird	NA	NA	FALSE
B122	B122	nextseq	151	1916624	958312	144.1612582388384	1802742	901371	Bird	NA	NA	FALSE
B123	B123	nextseq	151	1401104	700552	148.15624269840083	1258286	629143	Bird	0.9893075993436676	80.66666666666667	TRUE
B158	B158	nextseq	151	24	12	37.45	10	5	Bird	NA	NA	FALSE
B167	B167	nextseq	151	30603614	15301807	124.98116410553902	29415168	14707584	Bird	NA	NA	FALSE
B189	B189	nextseq	151	33569794	16784897	124.68092780628751	32149254	16074627	Bird	0.9782571860552582	1874.6666666666667	TRUE
B190	B190	nextseq	151	16	8	NA	NA	NA	Bird	NA	NA	FALSE
B193	B193	nextseq	151	16252070	8126035	122.84651729001308	15541920	7770960	Bird	0.9862783531759678	878	TRUE
B194	B194	nextseq	151	86482	43241	133.7698327997154	5622	2811	Bird	NA	NA	FALSE
B198	B198	miseq	187.7122348231657	535586	267793	175.05407778533936	511356	255678	Bird	NA	NA	FALSE
B203	B203	miseq	274.07582536276436	8339848	4169924	229.3452365744681	8062958	4031479	Bird	NA	NA	FALSE
B23	B023	miseq	255.905907877741	1051342	525671	246.18363331970343	1036936	518468	Bird	NA	NA	FALSE
B25	B025	miseq	252.52376146485676	1149382	574691	242.82091955810048	1132022	566011	Bird	0.992761228276852	129.33333333333334	TRUE
B250	B250	nextseq	142.40985230664944	767130	383565	134.34646352070604	751906	375953	Bird	0.9268799948154788	13.333333333333334	TRUE
B251	B251	nextseq	142.9097269023789	795320	397660	134.7212674515991	780874	390437	Bird	0.8690831447725834	5.333333333333333	TRUE
B26	B026	miseq	255.29524159524044	691156	345578	244.9671264969224	680396	340198	Bird	NA	NA	FALSE
B266	B266	nextseq	143.76489987222243	754436	377218	135.32575428329253	740902	370451	Bird	0.9767923656098456	38	TRUE
B27	B027	miseq	259.07810650043507	1402060	701030	248.42291384773733	1383504	691752	Bird	NA	NA	FALSE
B284	B284	nextseq	147.75619025425576	15113838	7556919	138.36785685456425	14940162	7470081	Bird	0.9800883576212048	839	TRUE
B285	B285	nextseq	147.9373069986907	13924776	6962388	138.64405507087176	13771636	6885818	Bird	0.9999771604958626	920.5	TRUE
B288	B288	nextseq	147.66617866833323	10304680	5152340	138.28085256552637	10184226	5092113	Bird	0.997380418122206	661.5	TRUE
B299	B299	nextseq	147.45446479698313	15476202	7738101	138.07636343705514	15289228	7644614	Bird	0.997905099874226	934	TRUE
B300	B300	nextseq	148.26751611766656	12436974	6218487	138.78279387584502	12302236	6151118	Bird	0.9846363690902864	882.6666666666666	TRUE
B302	B302	nextseq	148.23249654815513	11083928	5541964	138.82144977567276	10964786	5482393	Bird	0.9991377877314852	658.5	TRUE
B303	B303	nextseq	148.72061783185458	11949918	5974959	129.39499831643224	11766678	5883339	Bird	0.976851630582412	3	TRUE
B308	B308	nextseq	148.40329954128237	14855762	7427881	136.82799747709018	14687802	7343901	Bird	0.999748424308126	198.5	TRUE
B318	B318	nextseq	147.7861203358213	9025276	4512638	138.60949896114363	8920386	4460193	Bird	0.9930315772160092	567	TRUE
B320	B320	nextseq	147.72506074848502	5529356	2764678	138.0580138464157	5464230	2732115	Bird	0.9866804578727368	314	TRUE
B321	B321	nextseq	148.35371579886137	11643472	5821736	135.02269013700334	11489794	5744897	Bird	0.9987544325817294	18	TRUE
B325	B325	nextseq	147.5421396440504	6740280	3370140	138.06270040305867	6659080	3329540	Bird	0.9894388781131628	387	TRUE
B326	B326	nextseq	148.10181053126777	8876842	4438421	139.10547469180486	8780476	4390238	Bird	0.997152731583272	351	TRUE
B327	B327	nextseq	147.55353815025052	6909260	3454630	137.88253271515026	6828182	3414091	Bird	0.9887167993221038	354.3333333333333	TRUE
B328	B328	nextseq	147.9504364009344	10929170	5464585	139.18474296632382	10812980	5406490	Bird	0.9875282440734358	107.66666666666669	TRUE
B329	B329	nextseq	147.26580622461142	22117236	11058618	137.84172756641755	21847380	10923690	Bird	0.9995950067138945	1497	TRUE
B330	B330	nextseq	142.2048488487201	22328888	11164444	133.7756550094184	21894418	10947209	Bird	0.9980773528941284	1423.5666666666668	TRUE
B331	B331	nextseq	146.32160478145	14815924	7407962	136.61386469048608	14616208	7308104	Bird	0.9993255574059504	966.6666666666666	TRUE
B333	B333	nextseq	145.76923488720263	9900318	4950159	136.35092987611637	9750116	4875058	Bird	0.9993471521744008	282.85000000000036	TRUE
B335	B335	nextseq	146.04460595604837	3120794	1560397	137.1638969370928	3079362	1539681	Bird	0.9972595197963332	110.66666666666669	TRUE
B336	B336	nextseq	148.29844189396664	12029990	6014995	139.15974403458253	11905202	5952601	Bird	0.9956773978276946	467.3333333333333	TRUE
B337	B337	nextseq	147.63668519083072	6534168	3267084	138.52822504690596	6455472	3227736	Bird	0.9974676971598284	319	TRUE
B338	B338	nextseq	143.64665413869008	12719266	6359633	135.89387854873064	12485732	6242866	Bird	0.9958467282224204	572	TRUE
B339	B339	nextseq	148.20654375214048	7556796	3778398	138.41980265811696	7471906	3735953	Bird	0.9990314464624092	514.8666666666668	TRUE
B342	B342	nextseq	148.66552564479684	12537592	6268796	139.02919316342204	12407494	6203747	Bird	0.9993290637951237	809	TRUE
B345	B345	nextseq	148.01386384867098	9876334	4938167	138.70287136727572	9766706	4883353	Bird	0.9974481090765768	694.3333333333334	TRUE
B353	B353	nextseq	147.6552443213516	11504234	5752117	137.44270674801567	11360762	5680381	Bird	0.97243569246515	194.33333333333337	TRUE
B354	B354	nextseq	148.1456860404055	10926922	5463461	137.859842025435	10798194	5399097	Bird	0.9960663317051068	191	TRUE
B355	B355	nextseq	147.70727276460542	13539198	6769599	138.49242318111567	13376854	6688427	Bird	0.9985442343392352	836.6666666666666	TRUE
B357	B357	nextseq	144.12990125396527	3821318	1910659	134.7903600708986	3754094	1877047	Bird	0.994833262683302	15	TRUE
B358	B358	nextseq	147.8835272012748	12438020	6219010	138.1677075605249	12295522	6147761	Bird	0.99781816864245	738.6666666666666	TRUE
B36	B036	miseq	242.3292623615239	185050	92525	233.2320299244177	181524	90762	Bird	NA	NA	FALSE
B361	B361	nextseq	147.90021861046253	15378038	7689019	138.00180927164837	15192854	7596427	Bird	0.9897066257907072	765	TRUE
B362	B362	nextseq	147.93777661007417	17295104	8647552	138.12808150050404	17087698	8543849	Bird	0.9987184836148756	555.6666666666666	TRUE
B363	B363	nextseq	146.67571288921974	11563648	5781824	136.42958648363637	11400226	5700113	Bird	NA	NA	FALSE
B364	B364	nextseq	148.03325656389262	10431234	5215617	137.82332109706846	10306522	5153261	Bird	0.99962766446249	121.66666666666669	TRUE
B37	B037	miseq	258.31797923947624	958550	479275	247.323831561225	945578	472789	Bird	NA	NA	FALSE
B38	B038	miseq	259.05857725800035	537666	268833	248.62665466023304	529716	264858	Bird	NA	NA	FALSE
B39	B039	miseq	259.5160908062598	965396	482698	247.49719548587765	951680	475840	Bird	NA	NA	FALSE
B50	B050	miseq	256.83483846272	820306	410153	246.6576863104225	808060	404030	Bird	NA	NA	FALSE
B51	B051	miseq	264.03213461983546	1253010	626505	237.76806225530316	1219366	609683	Bird	NA	NA	FALSE
B63	B063	miseq	266.8697347846945	996398	498199	254.433492888097	984406	492203	Bird	NA	NA	FALSE
B67	B067	miseq	261.3567797545393	851786	425893	250.6931504147628	841686	420843	Bird	NA	NA	FALSE
Spiked_Mix_P1_2	Spiked_Mix_P1_2	nextseq	151	38396604	19198302	144.50715739002146	36604684	18302342	Validation	0.9987820303360108	479	TRUE
Spiked-M1	Spiked-M1	nextseq	148.81742235551263	2360760	1180380	144.54281539754055	2349622	1174811	Validation	0.9962335823501772	153.33333333333334	TRUE
Spiked-M10	Spiked-M10	nextseq	148.67765072310004	4659936	2329968	144.331303511428	4636860	2318430	Validation	0.9959498021874528	310.3333333333333	TRUE
Spiked-M11	Spiked-M11	nextseq	148.41847197442786	2792414	1396207	143.83181588137597	2778122	1389061	Validation	0.9968398169863169	183.66666666666663	TRUE
Spiked-M12	Spiked-M12	nextseq	146.33159074149236	2449034	1224517	142.38953037763594	2433402	1216701	Validation	0.9962940790054337	159.33333333333334	TRUE
Spiked-M13	Spiked-M13	nextseq	148.45289095974323	2455240	1227620	144.19306223661346	2442228	1221114	Validation	0.995724546461246	158.66666666666666	TRUE
Spiked-M14	Spiked-M14	nextseq	148.40182750564833	4371204	2185602	143.67560294029707	4347860	2173930	Validation	0.9980305521079732	295.6666666666667	TRUE
Spiked-M15	Spiked-M15	nextseq	148.13445586098476	2586306	1293153	143.77850588554497	2572574	1286287	Validation	0.9942466307983484	162.66666666666666	TRUE
Spiked-M16	Spiked-M16	nextseq	147.81914574110374	1871236	935618	143.41679425318108	1861482	930741	Validation	0.997382137075163	119.66666666666669	TRUE
Spiked-M17	Spiked-M17	nextseq	148.4652041148181	2084758	1042379	143.35343200465255	2073686	1036843	Validation	0.996971673849704	132.66666666666666	TRUE
Spiked-M18	Spiked-M18	nextseq	148.65322685673016	2196038	1098019	144.03374755052934	2185166	1092583	Validation	0.9992362577722036	154.66666666666666	TRUE
Spiked-M19	Spiked-M19	nextseq	148.18792625337505	3287364	1643682	143.84165191578086	3270990	1635495	Validation	0.9974365643265424	224.33333333333337	TRUE
Spiked-M2	Spiked-M2	nextseq	147.9236126391932	2581304	1290652	143.75218148456216	2567976	1283988	Validation	0.9971873097990546	166	TRUE
Spiked-M20	Spiked-M20	nextseq	148.35060414480876	4731316	2365658	144.36603817123807	4706266	2353133	Validation	0.9975654968219064	309.3333333333333	TRUE
Spiked-M3	Spiked-M3	nextseq	148.59448602575384	3166754	1583377	144.07283681252966	3150536	1575268	Validation	0.997574529163504	219.66666666666663	TRUE
Spiked-M4	Spiked-M4	nextseq	148.54615285284865	2725942	1362971	144.62001085490488	2712138	1356069	Validation	0.9962818302658856	177.33333333333334	TRUE
Spiked-M5	Spiked-M5	nextseq	148.36988192242143	2917404	1458702	143.83333976345864	2903002	1451501	Validation	0.9974498474997578	187.33333333333337	TRUE
Spiked-M6	Spiked-M6	nextseq	148.32272882716887	4251746	2125873	143.919275850426	4229292	2114646	Validation	0.9987379904462124	279.6666666666667	TRUE
Spiked-M7	Spiked-M7	nextseq	148.66813308174596	2075356	1037678	144.06818672681823	2065006	1032503	Validation	0.9996918408768192	140.66666666666666	TRUE
Spiked-M8	Spiked-M8	nextseq	148.4039948073753	3392504	1696252	144.41333545071112	3375244	1687622	Validation	0.9978729371905144	225.66666666666663	TRUE
Spiked-M9	Spiked-M9	nextseq	148.39541705434482	3815450	1907725	144.0963818765077	3796222	1898111	Validation	0.9970318722703004	256.3333333333333	TRUE
W021	W021	nextseq	151	1880	940	122.79133858267716	1778	889	Water	NA	NA	FALSE
W022	W022	nextseq	151	21609960	10804980	124.77817448608432	20734238	10367119	Water	0.9440653990083588	515.3333333333334	TRUE
W025	W025	nextseq	151	22917642	11458821	127.63283835264228	22181606	11090803	Water	0.47155262217370136	4	TRUE
W026	W026	nextseq	151	17181594	8590797	129.43338955101407	16527422	8263711	Water	0.9150760126820886	70.33333333333333	TRUE
W052	W052	nextseq	151	14928382	7464191	124.16529465212786	14340470	7170235	Water	0.9936278796974598	443	TRUE
W053	W053	nextseq	151	23351254	11675627	127.88024866483784	22283810	11141905	Water	0.7194907558002003	20.333333333333332	TRUE
W054	W054	nextseq	151	17113772	8556886	125.09986760273767	16332664	8166332	Water	0.682115256881357	13	TRUE
W078	W078	nextseq	147.8391035491881	9577458	4788729	136.41923314360616	9456738	4728369	Water	0.6489212338817615	14	TRUE
W079	W079	nextseq	147.93572083481902	12957060	6478530	138.2217565497822	12811342	6405671	Water	0.7112209928168045	64.33333333333333	TRUE
W081	W081	nextseq	148.19317326400147	11052544	5526272	138.34997547934228	10929560	5464780	Water	0.7166418929571441	57	TRUE
W082	W082	nextseq	148.2794038160723	12569678	6284839	137.45912026713154	12427136	6213568	Water	0.603331483259787	11.333333333333334	TRUE
W083	W083	nextseq	148.3249262275085	13961166	6980583	137.2594621550046	13794532	6897266	Water	0.6289759775430681	15	TRUE
W084	W084	nextseq	148.61312725013752	11252090	5626045	137.7590007296031	11126598	5563299	Water	0.7639675905070517	71	TRUE
W087	W087	nextseq	148.3055904657402	13794128	6897064	137.13003339217437	13626546	6813273	Water	0.9919072327766408	307	TRUE
