# Supplementary material for: Metagenomic Strain-Typing Combined with Isolate Sequencing Provides Increased Resolution of the Genetic Diversity of Campylobacter jejuni Carriage in Wild Birds
Source: Microorganisms. 2023 Jan 3;11(1):121. doi: 10.3390/microorganisms11010121 (PMC9860660; doi:10.3390/microorganisms11010121)
Supplement: Supplementary file 1 [file microorganisms-11-00121-s001.zip › Supplementary_Data_S3.xlsx]

## Sheet: artificial_mixes_truth
sampleID	ST_gyrA_porA	proportion_%	ST	aspA	glnA	gltA	glyA	pgm	tkt	uncA	fn_gyrA	porA	strainID_simple	strainID	uL	CT	ng/ul	n_strains	ng	sumng	sumuL
M1	10820-11-1224	0.454545	10820	64	89	319	100	134	103	16	11	1224	B039	B039-110619-03	10	2162	0.131	3	1.31	4.037	22
M1	2491-11-1634	0.318182	2491	64	22	212	100	134	233	16	11	1634	B028	B028-230519-01	7	2156	0.216	3	1.512	4.037	22
M1	2254-9-1	0.227273	2254	8	2	4	62	4	5	6	9	1	21126057	21126057	5	51	0.243	3	1.215	4.037	22
M2	448-102-2353	0.444444	448	61	70	22	18	2	74	47	102	2353	B023	B023-070519-01	8	2154	0.341	3	2.728	4.898	18
M2	10815-11-479	0.333333	10815	18	81	68	143	134	153	16	11	479	B051	B051-180619-02	6	2167	0.197	3	1.182	4.898	18
M2	8334-9-98	0.222222	8334	8	17	2	2	10	59	6	9	98	2007099	20007099	4	662	0.247	3	0.988	4.898	18
M3	5207-51-2356	0.5	5207	37	187	4	28	19	24	23	51	2356	B193	B193-200820-02	8	2614	0.0967	3	0.7736	2.4156	16
M3	677-19-276	0.3125	677	10	81	50	99	120	76	52	19	276	B203	B203-270820-04	5	36	0.206	3	1.03	2.4156	16
M3	7355-9-2360	0.1875	7355	8	17	5	2	10	59	23	9	2360	2101656	2101656	3	2151	0.204	3	0.612	2.4156	16
M4	45-7-49	0.625	45	4	7	10	4	1	7	1	7	49	B037	B037-110619-02	10	2158	0.185	2	1.85	3.008	16
M4	6175-9-1625	0.375	6175	2	1	5	10	608	1	5	9	1625	200220	200220	6	543	0.193	2	1.158	3.008	16
M5	6175-9-1625	0.526316	6175	2	1	5	10	608	1	5	9	1625	200220	200220	10	543	0.193	3	1.93	4.349	19
M5	7815-11-2352	0.263158	7815	64	105	203	100	134	94	16	11	2352	B052	B052-180619-01	5	2168	0.211	3	1.055	4.349	19
M5	448-102-2353	0.210526	448	61	70	22	18	2	74	47	102	2353	B023	B023-070519-01	4	2154	0.341	3	1.364	4.349	19
M6	4279-31-1638	0.352941	4279	27	22	22	376	43	86	31	31	1638	W033	W033-270220-02	6	2280	0.191	4	1.146	3.678	17
M6	122-3-2365	0.294118	122	6	4	5	2	2	1	5	3	2365	21028539	21028539	5	377	0.242	4	1.21	3.678	17
M6	951-31-1418	0.235294	951	18	100	82	24	138	116	63	31	1418	B096	B096-300719-001	4	2277	0.206	4	0.824	3.678	17
M6	1540-40-860	0.117647	1540	76	33	22	104	43	109	31	40	860	B036	B036-110619-02	2	2157	0.249	4	0.498	3.678	17
M7	1519-8-302	0.470588	1519	8	1	5	3	2	1	1	8	302	16062161	16062161	8	205	0.23	3	1.84	4.022	17
M7	122-3-2365	0.294118	122	6	4	5	2	2	1	5	3	2365	21028539	21028539	5	377	0.242	3	1.21	4.022	17
M7	2254-9-1	0.235294	2254	8	2	4	62	4	5	6	9	1	21126057	21126057	4	51	0.243	3	0.972	4.022	17
M8	8334-9-98	0.470588	8334	8	17	2	2	10	59	6	9	98	2007099	20007099	8	662	0.247	3	1.976	3.808	17
M8	7355-9-2360	0.294118	7355	8	17	5	2	10	59	23	9	2360	2101656	2101656	5	2151	0.204	3	1.02	3.808	17
M8	12253-8-2	0.235294	12253	2	17	5	2	10	12	736	8	2	21163228	21163228	4	2379	0.203	3	0.812	3.808	17
M9	2254-9-1	0.5	2254	8	2	4	62	4	5	6	9	1	21126057	21126057	8	51	0.243	3	1.944	3.247	16
M9	10820-11-1224	0.3125	10820	64	89	319	100	134	103	16	11	1224	B039	B039-110619-03	5	2162	0.131	3	0.655	3.247	16
M9	2491-11-1634	0.1875	2491	64	22	212	100	134	233	16	11	1634	B028	B028-230519-01	3	2156	0.216	3	0.648	3.247	16
M10	2491-11-1634	0.454545	2491	64	22	212	100	134	233	16	11	1634	B028	B028-230519-01	10	2156	0.216	3	2.16	4.292	22
M10	10820-11-1224	0.318182	10820	64	89	319	100	134	103	16	11	1224	B039	B039-110619-03	7	2162	0.131	3	0.917	4.292	22
M10	2254-9-1	0.227273	2254	8	2	4	62	4	5	6	9	1	21126057	21126057	5	51	0.243	3	1.215	4.292	22
M11	12253-8-2	0.625	12253	2	17	5	2	10	12	736	8	2	21163228	21163228	10	2379	0.203	2	2.03	3.164	16
M11	10818-104-391	0.375	10818	64	22	20	100	134	301	16	104	391	B038	B038-110619-01	6	2159	0.189	2	1.134	3.164	16
M12	12253-8-2	0.8	12253	2	17	5	2	10	12	736	8	2	21163228	21163228	12	2379	0.203	2	2.436	3.003	15
M12	10818-104-391	0.2	10818	64	22	20	100	134	301	16	104	391	B038	B038-110619-01	3	2159	0.189	2	0.567	3.003	15
M13	10818-104-391	0.8	10818	64	22	20	100	134	301	16	104	391	B038	B038-110619-01	12	2159	0.189	2	2.268	2.877	15
M13	12253-8-2	0.2	12253	2	17	5	2	10	12	736	8	2	21163228	21163228	3	2379	0.203	2	0.609	2.877	15
M14	538-7-73	0.4	538	4	7	10	4	42	25	1	7	73	W023	W023-021220-02	10	1392	0.243	4	2.43	6.09	25
M14	4279-31-1638	0.28	4279	27	22	22	376	43	86	31	31	1638	W033	W033-270220-02	7	2280	0.191	4	1.337	6.09	25
M14	448-102-2353	0.2	448	61	70	22	18	2	74	47	102	2353	B023	B023-070519-01	5	2154	0.341	4	1.705	6.09	25
M14	677-19-276	0.12	677	10	81	50	99	120	76	52	19	276	B203	B203-270820-04	3	36	0.206	4	0.618	6.09	25
M15	3536-104-391	0.555556	3536	64	22	20	100	134	160	16	104	391	B054	B054-180619-01	10	2169	0.341	3	3.41	5.12	18
M15	7355-9-2360	0.277778	7355	8	17	5	2	10	59	23	9	2360	2101656	2101656	5	2151	0.204	3	1.02	5.12	18
M15	1519-8-302	0.166667	1519	8	1	5	3	2	1	1	8	302	16062161	16062161	3	205	0.23	3	0.69	5.12	18
M16	1519-8-302	0.555556	1519	8	1	5	3	2	1	1	8	302	16062161	16062161	10	205	0.23	3	2.3	4.343	18
M16	7355-9-2360	0.277778	7355	8	17	5	2	10	59	23	9	2360	2101656	2101656	5	2151	0.204	3	1.02	4.343	18
M16	3536-104-391	0.166667	3536	64	22	20	100	134	160	16	104	391	B054	B054-180619-01	3	2169	0.341	3	1.023	4.343	18
M17	8334-9-98	0.666667	8334	8	17	2	2	10	59	6	9	98	2007099	20007099	10	662	0.247	2	2.47	3.49	15
M17	7355-9-2360	0.333333	7355	8	17	5	2	10	59	23	9	2360	2101656	2101656	5	2151	0.204	2	1.02	3.49	15
M18	8614-36-6	0.705882	8614	2	1	4	28	58	672	58	36	6	B189	B189-130820-01	12	2612	0.142	2	1.704	2.669	17
M18	6175-9-1625	0.294118	6175	2	1	5	10	608	1	5	9	1625	200220	200220	5	543	0.193	2	0.965	2.669	17
M19	1540-40-860	0.5	1540	76	33	22	104	43	109	31	40	860	B036	B036-110619-01	10	2157	0.22	3	2.2	3.773	20
M19	8614-36-6	0.35	8614	2	1	4	28	58	672	58	36	6	B189	B189-130820-01	7	2612	0.142	3	0.994	3.773	20
M19	6175-9-1625	0.15	6175	2	1	5	10	608	1	5	9	1625	200220	200220	3	543	0.193	3	0.579	3.773	20
M20	4279-31-1638	0.428571	4279	27	22	22	376	43	86	31	31	1638	W033	W033-270220-02	12	2280	0.191	4	2.292	5.485	28
M20	45-7-49	0.285714	45	4	7	10	4	1	7	1	7	49	B037	B037-110619-02	8	2158	0.185	4	1.48	5.485	28
M20	2491-11-1634	0.178571	2491	64	22	212	100	134	233	16	11	1634	B028	B028-230519-01	5	2156	0.216	4	1.08	5.485	28
M20	7815-11-2352	0.107143	7815	64	105	203	100	134	94	16	11	2352	B052	B052-180619-01	3	2168	0.211	4	0.633	5.485	28
Spiked_Mix_P1_2	19-1-7	0.571429	19	2	1	5	3	2	1	5	1	7	17051206	17051206	16			3
Spiked_Mix_P1_2	3218-1-1146	0.285714	3218	64	70	22	98	123	86	16	1	1146	E11047	E11047	8			3
Spiked_Mix_P1_2	5845-1-127	0.142857	5845	18	70	164	97	115	86	47	1	127	E120126	E120126	4			3

## Sheet: mixtures_preparation
												volumes used for each strain in the mixes (µl)
ID strains	ST	gyrA	porA		AspA	glnA	glt	gly	pgm	tkt	uncA	M1	M2	M3	M4	M5	M6	M7	M8	M9	M10	M11	M12	M13	M14	M15	M16	M17	M18	M19	M20
B037-02	45	7	49		4	7	10	4	1	7	1				10																8
B096-01	951	31	2358		18	100	82	24	138	116	63						4
W023-02	538	7	73		4	7	10	4	42	25	1														10
W033-02	4279	31	1638		27	22	22	376	43	86	31						6								7						12
B203-04	677	19	276		10	81	50	99	120	76	52			5											3
B023-01	448	102	2353		61	70	22	18	2	74	47		8			4									5
B028-01	2491	11	1634		64	22	212	100	134	233	16	7								3	10										5
B036-01	1540	40	860		76	33	22	104	43	109	31						2													10
B039-03	10820	11	1224		64	89	319	100	134	103	16	10								5	7
B051-02	10815	11	479		18	81	68	143	134	153	16		6
B038-01	10818	104	391		64	22	20	100	134	301	16											6	3	12
B052-01	7815	11	2352		64	105	203	100	134	94	16					5															3
B054-01	3536	104	391		64	22	20	100	134	160	16															10	3
B189-01	8614	36	6		2	1	4	28	58	672	58																		12	7
B193-02	5207	51	2356		37	187	4	28	19	24	23			8
LNS5998684	2254	9	1		8	2	4	62	4	5	6	5						4		8	5
LNS5594962	1519	8	302		8	1	5	3	2	1	1							8								3	10
LNS3449237	122	3	2365		6	4	5	2	2	1	5						5	5
200220	6175	9	1625		2	1	5	10	608	1	5				6	10													5	3
LNS1166071	8334	9	98		8	17	2	2	10	59	6		4						8									10
2101656	7355	9	2360		8	17	5	2	10	59	23			3					5							5	5	5
LNS8234199	12253	8	2		2	17	5	2	10	12	736								4			10	12	3
																																Spiked sample
Camp034	19	1	7		2	1	5	3	2	1	5																					16
E110047	3218	1	1146		64	70	22	98	123	86	16																					8
E120126	5845	1	127		18	70	164	97	115	86	47																					4
P1.2	poultry microbiome extract																															112

## Sheet: mixedstrains_predictions
sampleID	ST_gyrA_porA	abundance	ST	aspA	glnA	gltA	glyA	pgm	tkt	uncA	fn_gyrA	porA	max_ident	Cluster_member	mlst9_profile	SNP_clusterID	qvalue_depth_score	n_hits_score	unmatched_alleles	hits_summed_score	alleles_in_higher_abundance_profiles	corrected_score	Database
M1	10820-11-1224	0.446174	10820	64	89	319	100	134	103	16	11	1224	0.99844	B039-110619-03.fasta	64___89___319___100___134___103___16___11___1224	239	491.243	9		695151	0	9	EUROPE
M1	2491-11-1634	0.331677	2491	64	22	212	100	134	233	16	11	1634	1	B028-230519-01.fasta	64___22___212___100___134___233___16___11___1634	711	492.175	9		529217	5	4	EUROPE
M1	2254-9-1	0.096757	2254	8	2	4	62	4	5	6	9	1	0.999943	28636.fasta	8___2___4___62___4___5___6___9___1	63	379.392	7	glnA,uncA	31222	0	7	EUROPE
M2	448-102-2353	0.5072	448	61	70	22	18	2	74	47	102	2353	0.999429	B023-070519-01.fasta	61___70___22___18___2___74___47___102___2353	206	494.527	9		630776	0	9	EUROPE
M2	10815-11-479	0.260177	10815	18	81	68	143	134	153	16	11	479	0.999986	B051-180619-02.fasta	18___81___68___143___134___153___16___11___479	716	486.173	9		295665	0	9	EUROPE
M2	8334-9-98	0.161349	8334	8	17	2	2	10	59	6	9	98	0.999357	31470.fasta	8___17___2___2___10___59___6___9___98	34	474.213	9		136764	0	9	EUROPE
M3	5207-51-2356	0.395708	5207	37	187	4	28	19	24	23	51	2356	0.999986	B193-200820-02.fasta	37___187___4___28___19___24___23___51___2356	725	488.442	9		512735	0	9	EUROPE
M3	677-19-276	0.39215	677	10	81	50	99	120	76	52	19	276	0.999957	B046-180619-01.fasta	10___81___50___99___120___76___52___19___276	62	489.422	9		502640	0	9	EUROPE
M3	7355-9-2360	0.154649	7355	8	17	5	2	10	59	23	9	2360	0.997305	108793.fasta	8___17___5___2___10___59___23___9___2360	240	475.503	9		209264	1	8	EUROPE
M4	6427-11-1157	0.400504	6427	64	95	20	100	514	101	60	11	1157	0.997661	78916.fasta	64___95___20___100___514___101___60___11___1157	691	488.099	9		531414	0	9	EUROPE
M4	6175-9-1625	0.354237	6175	2	1	5	10	608	1	5	9	1625	0.999526	31558.fasta	2___1___5___10___608___1___5___9___1625	130	488.36	9		392592	0	9	EUROPE
M4	45-7-49	0.068574	45	4	7	10	4	1	7	1	7	49	0.999555	B037-110619-01.fasta	4___7___10___4___1___7___1___7___49	58	403.55	9		47377	0	9	EUROPE
M5	6175-9-1625	0.51757	6175	2	1	5	10	608	1	5	9	1625	0.999528	31558.fasta	2___1___5___10___608___1___5___9___1625	130	490.529	9		673437	0	9	EUROPE
M5	7815-11-2352	0.208903	7815	64	105	203	100	134	94	16	11	2352	1	B052-180619-01.fasta	64___105___203___100___134___94___16___11___2352	717	480.246	9		184383	0	9	EUROPE
M5	448-102-2353	0.206479	448	61	70	22	18	2	74	47	102	2353	0.999341	B023-070519-01.fasta	61___70___22___18___2___74___47___102___2353	206	483.967	9		193048	1	8	EUROPE
M6	4279-31-1638	0.333033	4279	27	22	22	376	43	86	31	31	1638	0.9999	B041-110619-02.fasta	27___22___22___376___43___86___31___31___1638	714	494.683	9		809529	0	9	EUROPE
M6	122-3-7	0.279912	122	6	4	5	2	2	1	5	3	7	0.999971	22293.fasta	6___4___5___2___2___1___5___3___7	13	463.636	8	porA	318047	0	8	EUROPE
M6	951-31-2358	0.239553	951	18	100	82	24	138	116	63	31	2358	1	B096-300719-02.fasta	18___100___82___24___138___116___63___31___2358	718	486.318	9		324959	1	8	EUROPE
M6	1540-40-860	0.070576	1540	76	33	22	104	43	109	31	40	860	0.998482	B036-110619-01.fasta	76___33___22___104___43___109___31___40___860	318	454.435	9		387069	3	6	EUROPE
M7	122-3-7	0.466511	122	6	4	5	2	2	1	5	3	7	0.999986	22293.fasta	6___4___5___2___2___1___5___3___7	13	473.254	8	porA	435958	0	8	EUROPE
M7	1519-8-302	0.358092	1519	8	1	5	3	2	1	1	8	302	0.999957	24690.fasta	8___1___5___3___2___1___1___8___302	38	456.164	9		347141	4	5	EUROPE
M7	2254-9-1	0.156454	2254	8	2	4	62	4	5	6	9	1	0.999986	28636.fasta	8___2___4___62___4___5___6___9___1	63	424.956	8	fn_gyrA	104892	2	6	EUROPE
M8	400-9-98	0.34985	400	8	17	5	2	10	59	6	9	98	0.999512	34431.fasta	8___17___5___2___10___59___6___9___98	34	491.724	9		1006681	0	9	EUROPE
M8	10846-8-2	0.325712	10846	2	17	5	2	10	12	6	8	2	1	110083.fasta	2___17___5___2___10___12___6___8___2	241	444.477	9		638156	5	4	EUROPE
M8	7355-9-2360	0.241996	7355	8	17	5	2	10	59	23	9	2360	0.99911	108793.fasta	8___17___5___2___10___59___23___9___2360	240	491.216	9		877997	7	2	EUROPE
M9	10820-11-1224	0.393247	10820	64	89	319	100	134	103	16	11	1224	0.998438	B039-110619-03.fasta	64___89___319___100___134___103___16___11___1224	239	490.81	9		940372	0	9	EUROPE
M9	2254-9-1	0.260609	2254	8	2	4	62	4	5	6	9	1	0.999986	28636.fasta	8___2___4___62___4___5___6___9___1	63	470.446	9		233801	0	9	EUROPE
M9	2491-11-1634	0.240208	2491	64	22	212	100	134	233	16	11	1634	1	B028-230519-01.fasta	64___22___212___100___134___233___16___11___1634	711	491.127	9		685075	5	4	EUROPE
M10	2491-11-1634	0.475195	2491	64	22	212	100	134	233	16	11	1634	1	B028-230519-01.fasta	64___22___212___100___134___233___16___11___1634	711	494.154	9		1227202	0	9	EUROPE
M10	10820-11-1224	0.337563	10820	64	89	319	100	134	103	16	11	1224	0.99838	B039-110619-03.fasta	64___89___319___100___134___103___16___11___1224	239	490.047	9		1179888	5	4	EUROPE
M10	2254-9-1	0.092124	2254	8	2	4	62	4	5	6	9	1	0.999943	28636.fasta	8___2___4___62___4___5___6___9___1	63	399.828	9		81492	0	9	EUROPE
M11	10846-8-2	0.613771	10846	2	17	5	2	10	12	6	8	2	1	110083.fasta	2___17___5___2___10___12___6___8___2	241	491.573	8	uncA	582837	0	8	EUROPE
M11	10818-104-391	0.326308	10818	64	22	20	100	134	301	16	104	391	1	B038-110619-01.fasta	64___22___20___100___134___301___16___104___391	352	491.031	9		332899	0	9	EUROPE
M11	10811-36-1279	0.047182	10811	64	33	20	181	94	17	16	36	1279	0.999943	B038-110619-02.fasta	64___33___20___181___94___17___16___36___1279	712	451.1	9		146371	3	6	EUROPE
M12	10846-8-2	0.781636	10846	2	17	5	2	10	12	6	8	2	1	110083.fasta	2___17___5___2___10___12___6___8___2	241	492.189	8	uncA	661382	0	8	EUROPE
M12	10818-104-391	0.184098	10818	64	22	20	100	134	301	16	104	391	0.999914	B038-110619-01.fasta	64___22___20___100___134___301___16___104___391	352	481.033	9		131160	0	9	EUROPE
M12	10811-36-1279	0.026389	10811	64	33	20	181	94	17	16	36	1279	0.998359	B038-110619-02.fasta	64___33___20___181___94___17___16___36___1279	712	412.575	8	pgm	56011	3	5	EUROPE
M13	10818-104-391	0.700694	10818	64	22	20	100	134	301	16	104	391	1	B038-110619-01.fasta	64___22___20___100___134___301___16___104___391	352	495.08	9		697898	0	9	EUROPE
M13	10846-8-2	0.197574	10846	2	17	5	2	10	12	6	8	2	1	110083.fasta	2___17___5___2___10___12___6___8___2	241	478.14	8	uncA	115676	0	8	EUROPE
M13	10811-36-1279	0.095488	10811	64	33	20	181	94	17	16	36	1279	0.999986	B038-110619-02.fasta	64___33___20___181___94___17___16___36___1279	712	466.951	9		271397	3	6	EUROPE
M14	538-7-73	0.36331	538	4	7	10	4	42	25	1	7	73	0.999457	W023-021219-02.fasta	4___7___10___4___42___25___1___7___73	86	486.781	9		791337	0	9	EUROPE
M14	4279-31-1638	0.248885	4279	27	22	22	376	43	86	31	31	1638	0.999786	B041-110619-02.fasta	27___22___22___376___43___86___31___31___1638	714	489.119	9		455367	0	9	EUROPE
M14	448-102-2353	0.194841	448	61	70	22	18	2	74	47	102	2353	0.999586	B023-070519-01.fasta	61___70___22___18___2___74___47___102___2353	206	482.296	9		288783	1	8	EUROPE
M14	677-19-276	0.120349	677	10	81	50	99	120	76	52	19	276	0.999971	B046-180619-01.fasta	10___81___50___99___120___76___52___19___276	62	463.436	9		141445	0	9	EUROPE
M15	3536-104-391	0.456122	3536	64	22	20	100	134	160	16	104	391	0.997825	B054-180619-01.fasta	64___22___20___100___134___160___16___104___391	352	494.2	9		566494	0	9	EUROPE
M15	7355-9-2360	0.231978	7355	8	17	5	2	10	59	23	9	2360	0.997825	108793.fasta	8___17___5___2___10___59___23___9___2360	240	485.446	9		252685	0	9	EUROPE
M15	1519-8-302	0.078042	1519	8	1	5	3	2	1	1	8	302	0.999928	24690.fasta	8___1___5___3___2___1___1___8___302	38	455.421	7	glnA,glyA	86205	2	5	EUROPE
M16	1519-8-302	0.36384	1519	8	1	5	3	2	1	1	8	302	0.999957	24690.fasta	8___1___5___3___2___1___1___8___302	38	489.028	9		296397	0	9	EUROPE
M16	7355-9-2360	0.299913	7355	8	17	5	2	10	59	23	9	2360	0.997741	108793.fasta	8___17___5___2___10___59___23___9___2360	240	490.429	9		333952	3	6	EUROPE
M16	3536-104-391	0.176909	3536	64	22	20	100	134	160	16	104	391	0.997599	B054-180619-01.fasta	64___22___20___100___134___160___16___104___391	352	479.155	9		119548	0	9	EUROPE
M17	8334-9-98	0.532546	8334	8	17	2	2	10	59	6	9	98	0.999418	31470.fasta	8___17___2___2___10___59___6___9___98	34	491.646	9		676278	0	9	EUROPE
M17	7355-9-2360	0.305034	7355	8	17	5	2	10	59	23	9	2360	0.998836	108793.fasta	8___17___5___2___10___59___23___9___2360	240	490.422	9		536442	7	2	EUROPE
M18	8614-36-6	0.70645	8614	2	1	4	28	58	672	58	36	6	1	B189-130820-01.fasta	2___1___4___28___58___672___58___36___6	233	491.618	9		686896	0	9	EUROPE
M18	6175-9-1625	0.255965	6175	2	1	5	10	608	1	5	9	1625	0.999131	31558.fasta	2___1___5___10___608___1___5___9___1625	130	477.99	9		292472	2	7	EUROPE
M19	8614-36-6	0.377074	8614	2	1	4	28	58	672	58	36	6	1	B189-130820-01.fasta	2___1___4___28___58___672___58___36___6	233	490.134	9		552612	0	9	EUROPE
M19	1540-40-860	0.256161	1540	76	33	22	104	43	109	31	40	860	0.997491	B036-110619-01.fasta	76___33___22___104___43___109___31___40___860	318	489.261	9		535594	0	9	EUROPE
M19	6175-9-1625	0.14461	6175	2	1	5	10	608	1	5	9	1625	0.99943	31558.fasta	2___1___5___10___608___1___5___9___1625	130	449.165	9		217650	2	7	EUROPE
M20	4279-31-1638	0.425919	4279	27	22	22	376	43	86	31	31	1638	0.999885	B041-110619-02.fasta	27___22___22___376___43___86___31___31___1638	714	493.258	9		839389	0	9	EUROPE
M20	6427-11-1157	0.188159	6427	64	95	20	100	514	101	60	11	1157	0.998738	78916.fasta	64___95___20___100___514___101___60___11___1157	691	481.788	9		550959	0	9	EUROPE
M20	2491-11-1634	0.162104	2491	64	22	212	100	134	233	16	11	1634	0.999986	B028-230519-01.fasta	64___22___212___100___134___233___16___11___1634	711	491.124	9		714978	4	5	EUROPE
M20	7815-11-2352	0.092581	7815	64	105	203	100	134	94	16	11	2352	0.999986	B052-180619-01.fasta	64___105___203___100___134___94___16___11___2352	717	480.828	9		535789	5	4	EUROPE
M20	45-7-49	0.032523	45	4	7	10	4	1	7	1	7	49	0.999641	B037-110619-01.fasta	4___7___10___4___1___7___1___7___49	58	345.8	8	pgm	31148	0	8	EUROPE
Spiked_Mix_P1_2	19-1-7	0.604715	19	2	1	5	3	2	1	5	1	7	1	5895.fasta	2___1___5___3___2___1___5___1___7	3	491.215	9		1837649	0	9	EUROPE
Spiked_Mix_P1_2	3218-1-1146	0.221851	3218	64	70	22	98	123	86	16	1	1146	0.998692	78917.fasta	64___70___22___98___123___86___16___1___1146	229	491.743	9		936424	1	8	EUROPE
Spiked_Mix_P1_2	5528-1-~1661	0.062147	5528	18	70	165	97	115	86	47	1	~1661	0.995111	5097_innuendo.fasta	18___70___165___97___115___86___47___1___~1661	575	432.126	7	gltA,porA	465238	3	4	EUROPE
M1	10820-11-1224	0.533666	10820	64	89	319	100	134	103	16	11	1224	0.999166	B039-110619-03.fasta	64___89___319___100___134___103___16___11___1224	320	491.243	9		695151	0	9	WITH_INHOUSE
M1	2491-11-1634	0.22579	2491	64	22	212	100	134	233	16	11	1634	0.997664	B028-230519-01.fasta	64___22___212___100___134___233___16___11___1634	439	492.175	9		529217	5	4	WITH_INHOUSE
M1	2254-9-1	0.079981	2254	8	2	4	62	4	5	6	9	1	0.998957	28636.fasta	8___2___4___62___4___5___6___9___1	15	379.392	7	glnA,uncA	31222	0	7	WITH_INHOUSE
M2	448-102-2353	0.483742	448	61	70	22	18	2	74	47	102	2353	0.999334	B023-070519-01.fasta	61___70___22___18___2___74___47___102___2353	486	494.527	9		630776	0	9	WITH_INHOUSE
M2	10815-11-479	0.253351	10815	18	81	68	143	134	153	16	11	479	1	B051-180619-02.fasta	18___81___68___143___134___153___16___11___479	973	486.173	9		295665	0	9	WITH_INHOUSE
M2	8334-9-98	0.176274	8334	8	17	2	2	10	59	6	9	98	0.999542	31470.fasta	8___17___2___2___10___59___6___9___98	60	474.213	9		136764	0	9	WITH_INHOUSE
M3	5207-51-2356	0.395036	5207	37	187	4	28	19	24	23	51	2356	1	B193-200820-02.fasta	37___187___4___28___19___24___23___51___2356	981	488.442	9		512735	0	9	WITH_INHOUSE
M3	677-19-276	0.392634	677	10	81	50	99	120	76	52	19	276	0.999958	B046-180619-01.fasta	10___81___50___99___120___76___52___19___276	101	489.422	9		502640	0	9	WITH_INHOUSE
M3	7355-9-2360	0.179687	7355	8	17	5	2	10	59	23	9	2360	0.998622	81980.fasta	8___17___5___2___10___59___23___9___2360	370	475.503	9		209264	1	8	WITH_INHOUSE
M4	6427-11-1157	0.421015	6427	64	95	20	100	514	101	60	11	1157	0.998868	78916.fasta	64___95___20___100___514___101___60___11___1157	867	488.099	9		531414	0	9	WITH_INHOUSE
M4	6175-9-1625	0.295623	6175	2	1	5	10	608	1	5	9	1625	0.9987	31558.fasta	2___1___5___10___608___1___5___9___1625	62	488.36	9		392592	0	9	WITH_INHOUSE
M4	45-7-49	0.027968	45	4	7	10	4	1	7	1	7	49	0.99912	B037-110619-01.fasta	4___7___10___4___1___7___1___7___49	63	403.55	9		47377	0	9	WITH_INHOUSE
M5	6175-9-1625	0.430519	6175	2	1	5	10	608	1	5	9	1625	0.998953	31558.fasta	2___1___5___10___608___1___5___9___1625	62	490.529	9		673437	0	9	WITH_INHOUSE
M5	7815-11-2352	0.202201	7815	64	105	203	100	134	94	16	11	2352	1	B052-180619-01.fasta	64___105___203___100___134___94___16___11___2352	974	480.246	9		184383	0	9	WITH_INHOUSE
M5	448-102-2353	0.187522	448	61	70	22	18	2	74	47	102	2353	0.999162	B023-070519-01.fasta	61___70___22___18___2___74___47___102___2353	486	483.967	9		193048	1	8	WITH_INHOUSE
M6	4279-31-1638	0.330104	4279	27	22	22	376	43	86	31	31	1638	0.999832	B041-110619-02.fasta	27___22___22___376___43___86___31___31___1638	971	494.683	9		809529	0	9	WITH_INHOUSE
M6	122-3-1259	0.286489	122	6	4	5	2	2	1	5	3	1259	1	111710.fasta	6___4___5___2___2___1___5___3___1259	29	463.636	8	porA	318047	0	8	WITH_INHOUSE
M6	951-31-2358	0.235217	951	18	100	82	24	138	116	63	31	2358	1	B096-300719-02.fasta	18___100___82___24___138___116___63___31___2358	975	486.318	9		324959	1	8	WITH_INHOUSE
M6	1540-40-860	0.069722	1540	76	33	22	104	43	109	31	40	860	0.998492	B036-110619-01.fasta	76___33___22___104___43___109___31___40___860	473	454.435	9		387069	3	6	WITH_INHOUSE
M7	122-3-1259	0.468134	122	6	4	5	2	2	1	5	3	1259	1	111710.fasta	6___4___5___2___2___1___5___3___1259	29	473.254	8	porA	435958	0	8	WITH_INHOUSE
M7	44-8-1	0.364412	44	8	1	6	3	2	1	1	8	1	1	41445.fasta	8___1___6___3___2___1___1___8___1	34	462.532	8	gltA	265258	3	5	WITH_INHOUSE
M7	10089-9-1	0.129654	10089	9	2	4	62	1034	5	6	9	1	0.998758	111197.fasta	9___2___4___62___1034___5___6___9___1	15	446.695	6	aspA,pgm,fn_gyrA	48812	1	5	WITH_INHOUSE
M8	400-9-98	0.472772	400	8	17	5	2	10	59	6	9	98	0.999792	34431.fasta	8___17___5___2___10___59___6___9___98	60	491.724	9		1006681	0	9	WITH_INHOUSE
M8	7355-9-2360	0.303748	7355	8	17	5	2	10	59	23	9	2360	0.999875	81980.fasta	8___17___5___2___10___59___23___9___2360	370	491.216	9		877997	7	2	WITH_INHOUSE
M9	10820-11-1224	0.456578	10820	64	89	319	100	134	103	16	11	1224	0.999206	B039-110619-03.fasta	64___89___319___100___134___103___16___11___1224	320	490.81	9		940372	0	9	WITH_INHOUSE
M9	2254-9-1	0.215386	2254	8	2	4	62	4	5	6	9	1	0.999081	28636.fasta	8___2___4___62___4___5___6___9___1	15	470.446	9		233801	0	9	WITH_INHOUSE
M9	2491-11-1634	0.163615	2491	64	22	212	100	134	233	16	11	1634	0.997743	B028-230519-01.fasta	64___22___212___100___134___233___16___11___1634	439	491.127	9		685075	5	4	WITH_INHOUSE
M10	10820-11-1224	0.407026	10820	64	89	319	100	134	103	16	11	1224	0.999208	B039-110619-03.fasta	64___89___319___100___134___103___16___11___1224	320	490.047	9		1179888	0	9	WITH_INHOUSE
M10	2491-11-1634	0.306561	2491	64	22	212	100	134	233	16	11	1634	0.997583	B028-230519-01.fasta	64___22___212___100___134___233___16___11___1634	439	494.154	9		1227202	5	4	WITH_INHOUSE
M10	2254-9-1	0.075268	2254	8	2	4	62	4	5	6	9	1	0.998916	28636.fasta	8___2___4___62___4___5___6___9___1	15	399.828	9		81492	0	9	WITH_INHOUSE
M11	10818-104-391	0.316102	10818	64	22	20	100	134	301	16	104	391	1	B038-110619-01.fasta	64___22___20___100___134___301___16___104___391	514	491.031	9		332899	0	9	WITH_INHOUSE
M11	10846-8-2	0.273247	10846	2	17	5	2	10	12	6	8	2	0.998116	110083.fasta	2___17___5___2___10___12___6___8___2	60	491.573	8	uncA	582837	0	8	WITH_INHOUSE
M11	10811-36-1279	0.033457	10811	64	33	20	181	94	17	16	36	1279	0.999958	B038-110619-02.fasta	64___33___20___181___94___17___16___36___1279	969	451.1	9		146371	3	6	WITH_INHOUSE
M12	10846-8-2	0.32261	10846	2	17	5	2	10	12	6	8	2	0.998133	110083.fasta	2___17___5___2___10___12___6___8___2	60	492.189	8	uncA	661382	0	8	WITH_INHOUSE
M12	10818-104-391	0.171294	10818	64	22	20	100	134	301	16	104	391	1	B038-110619-01.fasta	64___22___20___100___134___301___16___104___391	514	481.033	9		131160	0	9	WITH_INHOUSE
M12	8343-145-1705	0.011767	8343	64	33	22	100	122	17	16	145	1705	0.994026	32917.fasta	64___33___22___100___122___17___16___145___1705	697	415.529	5	gltA,pgm,porA,fn_gyrA	48224	3	2	WITH_INHOUSE
M13	10818-104-391	0.694807	10818	64	22	20	100	134	301	16	104	391	1	B038-110619-01.fasta	64___22___20___100___134___301___16___104___391	514	495.08	9		697898	0	9	WITH_INHOUSE
M13	10846-8-2	0.110712	10846	2	17	5	2	10	12	6	8	2	0.998293	110083.fasta	2___17___5___2___10___12___6___8___2	60	478.14	8	uncA	115676	0	8	WITH_INHOUSE
M13	10811-36-1279	0.094038	10811	64	33	20	181	94	17	16	36	1279	1	B038-110619-02.fasta	64___33___20___181___94___17___16___36___1279	969	466.951	9		271397	3	6	WITH_INHOUSE
M14	538-7-73	0.361614	538	4	7	10	4	42	25	1	7	73	0.999206	W023-021219-02.fasta	4___7___10___4___42___25___1___7___73	239	486.781	9		791337	0	9	WITH_INHOUSE
M14	4279-31-1638	0.243005	4279	27	22	22	376	43	86	31	31	1638	0.999791	B041-110619-02.fasta	27___22___22___376___43___86___31___31___1638	971	489.119	9		455367	0	9	WITH_INHOUSE
M14	448-102-2353	0.183691	448	61	70	22	18	2	74	47	102	2353	0.999457	B023-070519-01.fasta	61___70___22___18___2___74___47___102___2353	486	482.296	9		288783	1	8	WITH_INHOUSE
M14	677-19-276	0.1198	677	10	81	50	99	120	76	52	19	276	0.999958	B046-180619-01.fasta	10___81___50___99___120___76___52___19___276	101	463.436	9		141445	0	9	WITH_INHOUSE
M15	3536-104-391	0.553704	3536	64	22	20	100	134	160	16	104	391	0.999332	B054-180619-01.fasta	64___22___20___100___134___160___16___104___391	514	494.2	9		566494	0	9	WITH_INHOUSE
M15	7355-9-2360	0.274538	7355	8	17	5	2	10	59	23	9	2360	0.999207	81980.fasta	8___17___5___2___10___59___23___9___2360	370	485.446	9		252685	0	9	WITH_INHOUSE
M15	1519-8-302	0.06017	1519	8	1	5	3	2	1	1	8	302	1	24690.fasta	8___1___5___3___2___1___1___8___302	34	455.421	7	glnA,glyA	86205	2	5	WITH_INHOUSE
M16	1519-8-302	0.350084	1519	8	1	5	3	2	1	1	8	302	1	24690.fasta	8___1___5___3___2___1___1___8___302	34	489.028	9		296397	0	9	WITH_INHOUSE
M16	7355-9-2360	0.336041	7355	8	17	5	2	10	59	23	9	2360	0.999167	81980.fasta	8___17___5___2___10___59___23___9___2360	370	490.429	9		333952	3	6	WITH_INHOUSE
M16	3536-104-391	0.208093	3536	64	22	20	100	134	160	16	104	391	0.999292	B054-180619-01.fasta	64___22___20___100___134___160___16___104___391	514	479.155	9		119548	0	9	WITH_INHOUSE
M17	8334-9-98	0.535907	8334	8	17	2	2	10	59	6	9	98	0.999668	31470.fasta	8___17___2___2___10___59___6___9___98	60	491.646	9		676278	0	9	WITH_INHOUSE
M17	7355-9-2360	0.363695	7355	8	17	5	2	10	59	23	9	2360	0.999834	81980.fasta	8___17___5___2___10___59___23___9___2360	370	490.422	9		536442	7	2	WITH_INHOUSE
M18	8614-36-6	0.686047	8614	2	1	4	28	58	672	58	36	6	1	B189-130820-01.fasta	2___1___4___28___58___672___58___36___6	181	491.618	9		686896	0	9	WITH_INHOUSE
M18	6175-9-1625	0.217447	6175	2	1	5	10	608	1	5	9	1625	0.998832	31558.fasta	2___1___5___10___608___1___5___9___1625	62	477.99	9		292472	2	7	WITH_INHOUSE
M19	8614-36-6	0.374451	8614	2	1	4	28	58	672	58	36	6	1	B189-130820-01.fasta	2___1___4___28___58___672___58___36___6	181	490.134	9		552612	0	9	WITH_INHOUSE
M19	1540-40-860	0.260849	1540	76	33	22	104	43	109	31	40	860	0.997411	B036-110619-01.fasta	76___33___22___104___43___109___31___40___860	473	489.261	9		535594	0	9	WITH_INHOUSE
M19	6175-9-1625	0.12079	6175	2	1	5	10	608	1	5	9	1625	0.998956	31558.fasta	2___1___5___10___608___1___5___9___1625	62	449.165	9		217650	2	7	WITH_INHOUSE
M20	4279-31-1638	0.407547	4279	27	22	22	376	43	86	31	31	1638	0.999833	B041-110619-02.fasta	27___22___22___376___43___86___31___31___1638	971	493.258	9		839389	0	9	WITH_INHOUSE
M20	6427-11-1157	0.189122	6427	64	95	20	100	514	101	60	11	1157	0.99929	78916.fasta	64___95___20___100___514___101___60___11___1157	867	481.788	9		550959	0	9	WITH_INHOUSE
M20	2491-11-1634	0.10974	2491	64	22	212	100	134	233	16	11	1634	0.999081	B028-230519-01.fasta	64___22___212___100___134___233___16___11___1634	439	491.124	9		714978	4	5	WITH_INHOUSE
M20	7815-11-2352	0.108391	7815	64	105	203	100	134	94	16	11	2352	1	B052-180619-01.fasta	64___105___203___100___134___94___16___11___2352	974	480.828	9		535789	5	4	WITH_INHOUSE
M20	45-7-49	0.024155	45	4	7	10	4	1	7	1	7	49	0.998998	B037-110619-01.fasta	4___7___10___4___1___7___1___7___49	63	345.8	8	pgm	31148	0	8	WITH_INHOUSE
Spiked_Mix_P1_2	19-1-7	0.601946	19	2	1	5	3	2	1	5	1	7	1	5895.fasta	2___1___5___3___2___1___5___1___7	19	491.215	9		1837649	0	9	WITH_INHOUSE
Spiked_Mix_P1_2	3218-1-1146	0.234189	3218	64	70	22	98	123	86	16	1	1146	0.998952	78917.fasta	64___70___22___98___123___86___16___1___1146	365	491.743	9		936424	1	8	WITH_INHOUSE
Spiked_Mix_P1_2	5528-1-~1661	0.039751	5528	18	70	165	97	115	86	47	1	~1661	0.994971	5097_innuendo.fasta	18___70___165___97___115___86___47___1___~1661	779	432.126	7	gltA,porA	465238	3	4	WITH_INHOUSE
M1	4835-11-1224	0.54553	4835	64	89	319	100	94	103	16	11	1224	0.999117	10778.fasta	64___89___319___100___94___103___16___11___1224	416	490.601	8	pgm	613719	0	8	NO_INHOUSE
M1	2491-11-1157	0.227977	2491	64	22	212	100	134	233	16	11	1157	0.997434	22260.fasta	64___22___212___100___134___233___16___11___1157	685	471.176	8	porA	486861	4	4	NO_INHOUSE
M1	2254-9-1	0.084458	2254	8	2	4	62	4	5	6	9	1	0.998949	28636.fasta	8___2___4___62___4___5___6___9___1	16	379.392	7	glnA,uncA	31222	0	7	NO_INHOUSE
M2	448-31-2034	0.471108	448	61	70	22	18	2	74	47	31	2034	0.999155	61220.fasta	61___70___22___18___2___74___47___31___2034	852	470.256	7	porA,fn_gyrA	478570	0	7	NO_INHOUSE
M2	1309-60-406	0.197484	1309	18	81	111	143	134	153	16	60	406	0.996326	48453.fasta	18___81___111___143___134___153___16___60___406	328	478.524	6	gltA,porA,fn_gyrA	185737	0	6	NO_INHOUSE
M2	8334-9-98	0.167381	8334	8	17	2	2	10	59	6	9	98	0.999535	31470.fasta	8___17___2___2___10___59___6___9___98	66	474.213	9		136764	0	9	NO_INHOUSE
M3	677-19-276	0.387932	677	10	81	50	99	120	76	52	19	276	0.999958	59177.fasta	10___81___50___99___120___76___52___19___276	103	489.422	9		502640	0	9	NO_INHOUSE
M3	7355-9-2360	0.147222	7355	8	17	5	2	10	59	23	9	2360	0.998602	81980.fasta	8___17___5___2___10___59___23___9___2360	368	475.503	9		209264	0	9	NO_INHOUSE
M4	6427-11-1157	0.408625	6427	64	95	20	100	514	101	60	11	1157	0.998652	78916.fasta	64___95___20___100___514___101___60___11___1157	909	488.099	9		531414	0	9	NO_INHOUSE
M4	6175-9-1625	0.304286	6175	2	1	5	10	608	1	5	9	1625	0.998652	31558.fasta	2___1___5___10___608___1___5___9___1625	69	488.36	9		392592	0	9	NO_INHOUSE
M4	45-7-2405	0.030102	45	4	7	10	4	1	7	1	7	2405	0.998694	2699.fasta	4___7___10___4___1___7___1___7___2405	28	375.468	8	porA	32585	0	8	NO_INHOUSE
M5	6175-9-1625	0.426465	6175	2	1	5	10	608	1	5	9	1625	0.998903	31558.fasta	2___1___5___10___608___1___5___9___1625	69	490.529	9		673437	0	9	NO_INHOUSE
M5	448-31-2034	0.184594	448	61	70	22	18	2	74	47	31	2034	0.99903	61220.fasta	61___70___22___18___2___74___47___31___2034	852	458.64	7	porA,fn_gyrA	130155	1	6	NO_INHOUSE
M5	7811-11-2366	0.047181	7811	64	133	203	142	134	160	60	11	2366	0.994432	33939.fasta	64___133___203___142___134___160___60___11___2366	727	443.148	4	glnA,glyA,tkt,uncA,porA	65131	0	4	NO_INHOUSE
M5	1483-11-498	0.021335	1483	64	22	20	100	134	94	16	11	498	0.993715	78899.fasta	64___22___20___100___134___94___16___11___498	903	468.515	6	glnA,gltA,porA	120388	3	3	NO_INHOUSE
M6	122-3-1259	0.26476	122	6	4	5	2	2	1	5	3	1259	1	111710.fasta	6___4___5___2___2___1___5___3___1259	29	463.636	8	porA	318047	0	8	NO_INHOUSE
M6	951-31-2358	0.232926	951	18	100	82	24	138	116	63	31	2358	1	48448.fasta	18___100___82___24___138___116___63___31___2358	788	486.318	9		324959	0	9	NO_INHOUSE
M6	8368-39-680	0.164379	8368	27	22	22	104	115	86	31	39	680	0.996869	50656.fasta	27___22___22___104___115___86___31___39___680	481	463.195	6	pgm,porA,fn_gyrA	467613	0	6	NO_INHOUSE
M6	1540-40-1353	0.059934	1540	76	33	22	104	43	109	31	40	1353	0.998139	50086.fasta	76___33___22___104___43___109___31___40___1353	796	433.083	8	porA	359962	3	5	NO_INHOUSE
M7	122-3-1259	0.470508	122	6	4	5	2	2	1	5	3	1259	1	111710.fasta	6___4___5___2___2___1___5___3___1259	29	473.254	8	porA	435958	0	8	NO_INHOUSE
M7	44-8-1	0.362064	44	8	1	6	3	2	1	1	8	1	1	41445.fasta	8___1___6___3___2___1___1___8___1	32	462.532	8	gltA	265258	3	5	NO_INHOUSE
M7	10089-9-1	0.096389	10089	9	2	4	62	1034	5	6	9	1	0.998744	111197.fasta	9___2___4___62___1034___5___6___9___1	16	446.695	6	aspA,pgm,fn_gyrA	48812	1	5	NO_INHOUSE
M8	400-9-98	0.47266	400	8	17	5	2	10	59	6	9	98	0.999789	34431.fasta	8___17___5___2___10___59___6___9___98	66	491.724	9		1006681	0	9	NO_INHOUSE
M8	7355-9-2360	0.303226	7355	8	17	5	2	10	59	23	9	2360	0.999873	81980.fasta	8___17___5___2___10___59___23___9___2360	368	491.216	9		877997	7	2	NO_INHOUSE
M9	4835-11-1224	0.458647	4835	64	89	319	100	94	103	16	11	1224	0.999157	10778.fasta	64___89___319___100___94___103___16___11___1224	416	490.102	8	pgm	827255	0	8	NO_INHOUSE
M9	2491-11-1157	0.169633	2491	64	22	212	100	134	233	16	11	1157	0.997598	22260.fasta	64___22___212___100___134___233___16___11___1157	685	470.075	8	porA	635062	4	4	NO_INHOUSE
M9	2254-9-1	0.169325	2254	8	2	4	62	4	5	6	9	1	0.999073	28636.fasta	8___2___4___62___4___5___6___9___1	16	470.446	9		233801	0	9	NO_INHOUSE
M10	4835-11-1224	0.410728	4835	64	89	319	100	94	103	16	11	1224	0.999198	10778.fasta	64___89___319___100___94___103___16___11___1224	416	489.236	8	pgm	1015708	0	8	NO_INHOUSE
M10	2491-11-1157	0.313795	2491	64	22	212	100	134	233	16	11	1157	0.997383	22260.fasta	64___22___212___100___134___233___16___11___1157	685	473.375	8	porA	1109765	4	4	NO_INHOUSE
M10	2254-9-1	0.063004	2254	8	2	4	62	4	5	6	9	1	0.998902	28636.fasta	8___2___4___62___4___5___6___9___1	16	399.828	9		81492	0	9	NO_INHOUSE
M11	10846-8-2	0.298958	10846	2	17	5	2	10	12	6	8	2	0.998046	110083.fasta	2___17___5___2___10___12___6___8___2	66	491.573	8	uncA	582837	0	8	NO_INHOUSE
M11	7817-11-2531	0.042373	7817	64	22	460	351	752	187	60	11	2531	0.993924	107389.fasta	64___22___460___351___752___187___60___11___2531	573	468.271	2	gltA,glyA,pgm,tkt,uncA,porA,fn_gyrA	50924	0	2	NO_INHOUSE
M11	6427-11-1157	0.042354	6427	64	95	20	100	514	101	60	11	1157	0.993542	78916.fasta	64___95___20___100___514___101___60___11___1157	909	456.935	3	glnA,pgm,tkt,uncA,porA,fn_gyrA	103769	1	2	NO_INHOUSE
M11	6460-11-1705	0.020085	6460	64	33	22	98	94	17	16	11	1705	0.994604	78887.fasta	64___33___22___98___94___17___16___11___1705	901	432.99	5	gltA,glyA,porA,fn_gyrA	93111	1	4	NO_INHOUSE
M12	10846-8-2	0.330831	10846	2	17	5	2	10	12	6	8	2	0.998069	110083.fasta	2___17___5___2___10___12___6___8___2	66	492.189	8	uncA	661382	0	8	NO_INHOUSE
M12	7803-11-498	0.016719	7803	64	22	20	351	134	94	16	11	498	0.993411	107350.fasta	64___22___20___351___134___94___16___11___498	571	425.173	6	glyA,tkt,porA	67877	0	6	NO_INHOUSE
M13	10846-8-2	0.107175	10846	2	17	5	2	10	12	6	8	2	0.998237	110083.fasta	2___17___5___2___10___12___6___8___2	66	478.14	8	uncA	115676	0	8	NO_INHOUSE
M13	6427-11-1157	0.100938	6427	64	95	20	100	514	101	60	11	1157	0.993158	78916.fasta	64___95___20___100___514___101___60___11___1157	909	444.132	4	glnA,pgm,tkt,uncA,porA	235763	0	4	NO_INHOUSE
M13	6460-11-1705	0.028554	6460	64	33	22	98	94	17	16	11	1705	0.993662	78887.fasta	64___33___22___98___94___17___16___11___1705	901	439.78	6	gltA,glyA,porA	175082	3	3	NO_INHOUSE
M14	538-7-73	0.361624	538	4	7	10	4	42	25	1	7	73	0.999236	107515.fasta	4___7___10___4___42___25___1___7___73	228	486.781	9		791337	0	9	NO_INHOUSE
M14	448-31-2034	0.190734	448	61	70	22	18	2	74	47	31	2034	0.999321	61220.fasta	61___70___22___18___2___74___47___31___2034	852	461.888	8	porA	264327	0	8	NO_INHOUSE
M14	677-19-276	0.118982	677	10	81	50	99	120	76	52	19	276	0.999958	59177.fasta	10___81___50___99___120___76___52___19___276	103	463.436	9		141445	0	9	NO_INHOUSE
M14	8368-39-680	0.092644	8368	27	22	22	104	115	86	31	39	680	0.996563	50656.fasta	27___22___22___104___115___86___31___39___680	481	452.406	5	glyA,pgm,porA,fn_gyrA	268519	1	4	NO_INHOUSE
M15	7355-9-2360	0.270009	7355	8	17	5	2	10	59	23	9	2360	0.999198	81980.fasta	8___17___5___2___10___59___23___9___2360	368	485.446	9		252685	0	9	NO_INHOUSE
M15	6427-11-1157	0.092907	6427	64	95	20	100	514	101	60	11	1157	0.990839	78916.fasta	64___95___20___100___514___101___60___11___1157	909	459.01	3	glnA,pgm,tkt,uncA,porA,fn_gyrA	161549	0	3	NO_INHOUSE
M15	1519-8-302	0.075575	1519	8	1	5	3	2	1	1	8	302	1	24690.fasta	8___1___5___3___2___1___1___8___302	32	455.421	7	glnA,glyA	86205	2	5	NO_INHOUSE
M15	8769-11-2372	0.043592	8769	216	22	85	142	134	101	16	11	2372	0.991388	34690.fasta	216___22___85___142___134___101___16___11___2372	745	485.85	3	aspA,gltA,glyA,tkt,porA,fn_gyrA	201140	1	2	NO_INHOUSE
M16	1519-8-302	0.356749	1519	8	1	5	3	2	1	1	8	302	1	24690.fasta	8___1___5___3___2___1___1___8___302	32	489.028	9		296397	0	9	NO_INHOUSE
M16	7355-9-2360	0.329602	7355	8	17	5	2	10	59	23	9	2360	0.999156	81980.fasta	8___17___5___2___10___59___23___9___2360	368	490.429	9		333952	3	6	NO_INHOUSE
M16	6427-11-1157	0.038271	6427	64	95	20	100	514	101	60	11	1157	0.991349	78916.fasta	64___95___20___100___514___101___60___11___1157	909	428.614	3	glnA,pgm,tkt,uncA,porA,fn_gyrA	28940	0	3	NO_INHOUSE
M17	8334-9-98	0.538226	8334	8	17	2	2	10	59	6	9	98	0.999664	31470.fasta	8___17___2___2___10___59___6___9___98	66	491.646	9		676278	0	9	NO_INHOUSE
M17	7355-9-2360	0.365082	7355	8	17	5	2	10	59	23	9	2360	0.999832	81980.fasta	8___17___5___2___10___59___23___9___2360	368	490.422	9		536442	7	2	NO_INHOUSE
M18	8614-36-6	0.687348	8614	2	1	4	28	58	672	58	36	6	1	80888.fasta	2___1___4___28___58___672___58___36___6	178	491.618	9		686896	0	9	NO_INHOUSE
M18	6175-9-1625	0.204884	6175	2	1	5	10	608	1	5	9	1625	0.998817	31558.fasta	2___1___5___10___608___1___5___9___1625	69	477.99	9		292472	2	7	NO_INHOUSE
M19	8614-36-6	0.37312	8614	2	1	4	28	58	672	58	36	6	1	80888.fasta	2___1___4___28___58___672___58___36___6	178	490.134	9		552612	0	9	NO_INHOUSE
M19	1540-40-1353	0.239759	1540	76	33	22	104	43	109	31	40	1353	0.996986	50086.fasta	76___33___22___104___43___109___31___40___1353	796	471.97	8	porA	460328	0	8	NO_INHOUSE
M19	6175-9-1625	0.124406	6175	2	1	5	10	608	1	5	9	1625	0.998939	31558.fasta	2___1___5___10___608___1___5___9___1625	69	449.165	9		217650	2	7	NO_INHOUSE
M20	8368-39-680	0.204022	8368	27	22	22	104	115	86	31	39	680	0.996669	50656.fasta	27___22___22___104___115___86___31___39___680	481	457.717	5	glyA,pgm,porA,fn_gyrA	483939	0	5	NO_INHOUSE
M20	6427-11-1157	0.185946	6427	64	95	20	100	514	101	60	11	1157	0.999199	78916.fasta	64___95___20___100___514___101___60___11___1157	909	481.788	9		550959	0	9	NO_INHOUSE
M20	2491-11-1157	0.117335	2491	64	22	212	100	134	233	16	11	1157	0.998988	22260.fasta	64___22___212___100___134___233___16___11___1157	685	485.608	9		725062	5	4	NO_INHOUSE
M20	45-7-180	0.032992	45	4	7	10	4	1	7	1	7	180	0.998946	107526.fasta	4___7___10___4___1___7___1___7___180	87	306.097	7	pgm,porA	17191	0	7	NO_INHOUSE
M20	3925-31-947	0.025979	3925	27	99	22	356	43	375	31	31	947	0.992369	59176.fasta	27___99___22___356___43___375___31___31___947	840	466.631	5	glnA,glyA,tkt,porA	412756	3	2	NO_INHOUSE
Spiked_Mix_P1_2	19-58-7	0.599431	19	2	1	5	3	2	1	5	58	7	1	16167.fasta	2___1___5___3___2___1___5___58___7	34	490.738	8	fn_gyrA	1568126	0	8	NO_INHOUSE
Spiked_Mix_P1_2	3218-1-1146	0.230282	3218	64	70	22	98	123	86	16	1	1146	0.998854	78917.fasta	64___70___22___98___123___86___16___1___1146	360	491.743	9		936424	1	8	NO_INHOUSE
Spiked_Mix_P1_2	5528-1-~1661	0.038536	5528	18	70	165	97	115	86	47	1	~1661	0.994697	5097_innuendo.fasta	18___70___165___97___115___86___47___1___~1661	809	432.126	7	gltA,porA	465238	3	4	NO_INHOUSE

## Sheet: comparison
sampleID	ST_gyrA_porA.x	proportion_%	ST.x	aspA.x	glnA.x	gltA.x	glyA.x	pgm.x	tkt.x	uncA.x	fn_gyrA.x	porA.x	match_id	unmatched_alleles_truthcomp		n_matches	ST_gyrA_porA.y	abundance	ST.y	aspA.y	glnA.y	gltA.y	glyA.y	pgm.y	tkt.y	uncA.y	fn_gyrA.y	porA.y	max_ident	corrected_score	abundance_error	Database
M1	10820-11-1224	0.454545	10820	64	89	319	100	134	103	16	11	1224	M1___B039-110619-03.fasta			9	10820-11-1224	0.446174	10820	64	89	319	100	134	103	16	11	1224	0.99844	9	0.00837145	EUROPE
M1	2491-11-1634	0.318182	2491	64	22	212	100	134	233	16	11	1634	M1___B028-230519-01.fasta			9	2491-11-1634	0.331677	2491	64	22	212	100	134	233	16	11	1634	1	4	0.0134952	EUROPE
M1	2254-9-1	0.227273	2254	8	2	4	62	4	5	6	9	1	M1___28636.fasta			9	2254-9-1	0.096757	2254	8	2	4	62	4	5	6	9	1	0.999943	7	0.130516	EUROPE
M2	448-102-2353	0.444444	448	61	70	22	18	2	74	47	102	2353	M2___B023-070519-01.fasta			9	448-102-2353	0.5072	448	61	70	22	18	2	74	47	102	2353	0.999429	9	0.0627556	EUROPE
M2	10815-11-479	0.333333	10815	18	81	68	143	134	153	16	11	479	M2___B051-180619-02.fasta			9	10815-11-479	0.260177	10815	18	81	68	143	134	153	16	11	479	0.999986	9	0.0731563	EUROPE
M2	8334-9-98	0.222222	8334	8	17	2	2	10	59	6	9	98	M2___31470.fasta			9	8334-9-98	0.161349	8334	8	17	2	2	10	59	6	9	98	0.999357	9	0.0608732	EUROPE
M3	5207-51-2356	0.5	5207	37	187	4	28	19	24	23	51	2356	M3___B193-200820-02.fasta			9	5207-51-2356	0.395708	5207	37	187	4	28	19	24	23	51	2356	0.999986	9	0.104292	EUROPE
M3	677-19-276	0.3125	677	10	81	50	99	120	76	52	19	276	M3___B046-180619-01.fasta			9	677-19-276	0.39215	677	10	81	50	99	120	76	52	19	276	0.999957	9	0.07965	EUROPE
M3	7355-9-2360	0.1875	7355	8	17	5	2	10	59	23	9	2360	M3___108793.fasta			9	7355-9-2360	0.154649	7355	8	17	5	2	10	59	23	9	2360	0.997305	8	0.032851	EUROPE
M4	45-7-49	0.625	45	4	7	10	4	1	7	1	7	49	M4___B037-110619-01.fasta			9	45-7-49	0.068574	45	4	7	10	4	1	7	1	7	49	0.999555	9	0.556426	EUROPE
M4	6175-9-1625	0.375	6175	2	1	5	10	608	1	5	9	1625	M4___31558.fasta			9	6175-9-1625	0.354237	6175	2	1	5	10	608	1	5	9	1625	0.999526	9	0.020763	EUROPE
M4																	6427-11-1157	0.400504	6427	64	95	20	100	514	101	60	11	1157	0.997661	9		EUROPE
M5	6175-9-1625	0.526316	6175	2	1	5	10	608	1	5	9	1625	M5___31558.fasta			9	6175-9-1625	0.51757	6175	2	1	5	10	608	1	5	9	1625	0.999528	9	0.00874579	EUROPE
M5	7815-11-2352	0.263158	7815	64	105	203	100	134	94	16	11	2352	M5___B052-180619-01.fasta			9	7815-11-2352	0.208903	7815	64	105	203	100	134	94	16	11	2352	1	9	0.0542549	EUROPE
M5	448-102-2353	0.210526	448	61	70	22	18	2	74	47	102	2353	M5___B023-070519-01.fasta			9	448-102-2353	0.206479	448	61	70	22	18	2	74	47	102	2353	0.999341	8	0.00404732	EUROPE
M6	4279-31-1638	0.352941	4279	27	22	22	376	43	86	31	31	1638	M6___B041-110619-02.fasta			9	4279-31-1638	0.333033	4279	27	22	22	376	43	86	31	31	1638	0.9999	9	0.0199082	EUROPE
M6	122-3-2365	0.294118	122	6	4	5	2	2	1	5	3	2365	M6___22293.fasta	porA		8	122-3-7	0.279912	122	6	4	5	2	2	1	5	3	7	0.999971	8	0.0142056	EUROPE
M6	951-31-1418	0.235294	951	18	100	82	24	138	116	63	31	1418	M6___B096-300719-02.fasta	porA		8	951-31-2358	0.239553	951	18	100	82	24	138	116	63	31	2358	1	8	0.00425888	EUROPE
M6	1540-40-860	0.117647	1540	76	33	22	104	43	109	31	40	860	M6___B036-110619-01.fasta			9	1540-40-860	0.070576	1540	76	33	22	104	43	109	31	40	860	0.998482	6	0.0470711	EUROPE
M7	1519-8-302	0.470588	1519	8	1	5	3	2	1	1	8	302	M7___24690.fasta			9	1519-8-302	0.358092	1519	8	1	5	3	2	1	1	8	302	0.999957	5	0.112496	EUROPE
M7	122-3-2365	0.294118	122	6	4	5	2	2	1	5	3	2365	M7___22293.fasta	porA		8	122-3-7	0.466511	122	6	4	5	2	2	1	5	3	7	0.999986	8	0.172393	EUROPE
M7	2254-9-1	0.235294	2254	8	2	4	62	4	5	6	9	1	M7___28636.fasta			9	2254-9-1	0.156454	2254	8	2	4	62	4	5	6	9	1	0.999986	6	0.0788401	EUROPE
M8	8334-9-98	0.470588	8334	8	17	2	2	10	59	6	9	98	M8___34431.fasta	gltA		8	400-9-98	0.34985	400	8	17	5	2	10	59	6	9	98	0.999512	9	0.120738	EUROPE
M8	7355-9-2360	0.294118	7355	8	17	5	2	10	59	23	9	2360	M8___108793.fasta			9	7355-9-2360	0.241996	7355	8	17	5	2	10	59	23	9	2360	0.99911	2	0.0521216	EUROPE
M8	10846-8-2	0.235294	10846	2	17	5	2	10	12	736	8	2	M8___110083.fasta	uncA		8	10846-8-2	0.325712	10846	2	17	5	2	10	12	6	8	2	1	4	0.0904179	EUROPE
M9	2254-9-1	0.5	2254	8	2	4	62	4	5	6	9	1	M9___28636.fasta			9	2254-9-1	0.260609	2254	8	2	4	62	4	5	6	9	1	0.999986	9	0.239391	EUROPE
M9	10820-11-1224	0.3125	10820	64	89	319	100	134	103	16	11	1224	M9___B039-110619-03.fasta			9	10820-11-1224	0.393247	10820	64	89	319	100	134	103	16	11	1224	0.998438	9	0.080747	EUROPE
M9	2491-11-1634	0.1875	2491	64	22	212	100	134	233	16	11	1634	M9___B028-230519-01.fasta			9	2491-11-1634	0.240208	2491	64	22	212	100	134	233	16	11	1634	1	4	0.052708	EUROPE
M10	2491-11-1634	0.454545	2491	64	22	212	100	134	233	16	11	1634	M10___B028-230519-01.fasta			9	2491-11-1634	0.475195	2491	64	22	212	100	134	233	16	11	1634	1	9	0.0206495	EUROPE
M10	10820-11-1224	0.318182	10820	64	89	319	100	134	103	16	11	1224	M10___B039-110619-03.fasta			9	10820-11-1224	0.337563	10820	64	89	319	100	134	103	16	11	1224	0.99838	4	0.0193812	EUROPE
M10	2254-9-1	0.227273	2254	8	2	4	62	4	5	6	9	1	M10___28636.fasta			9	2254-9-1	0.092124	2254	8	2	4	62	4	5	6	9	1	0.999943	9	0.135149	EUROPE
M11	10846-8-2	0.625	10846	2	17	5	2	10	12	736	8	2	M11___110083.fasta	uncA		8	10846-8-2	0.613771	10846	2	17	5	2	10	12	6	8	2	1	8	0.011229	EUROPE
M11	10818-104-391	0.375	10818	64	22	20	100	134	301	16	104	391	M11___B038-110619-01.fasta			9	10818-104-391	0.326308	10818	64	22	20	100	134	301	16	104	391	1	9	0.048692	EUROPE
M11																	10811-36-1279	0.047182	10811	64	33	20	181	94	17	16	36	1279	0.999943	6		EUROPE
M12	10846-8-2	0.8	10846	2	17	5	2	10	12	736	8	2	M12___110083.fasta	uncA		8	10846-8-2	0.781636	10846	2	17	5	2	10	12	6	8	2	1	8	0.018364	EUROPE
M12	10818-104-391	0.2	10818	64	22	20	100	134	301	16	104	391	M12___B038-110619-01.fasta			9	10818-104-391	0.184098	10818	64	22	20	100	134	301	16	104	391	0.999914	9	0.015902	EUROPE
M12																	10811-36-1279	0.026389	10811	64	33	20	181	94	17	16	36	1279	0.998359	5		EUROPE
M13	10818-104-391	0.8	10818	64	22	20	100	134	301	16	104	391	M13___B038-110619-01.fasta			9	10818-104-391	0.700694	10818	64	22	20	100	134	301	16	104	391	1	9	0.099306	EUROPE
M13	10846-8-2	0.2	10846	2	17	5	2	10	12	736	8	2	M13___110083.fasta	uncA		8	10846-8-2	0.197574	10846	2	17	5	2	10	12	6	8	2	1	8	0.002426	EUROPE
M13																	10811-36-1279	0.095488	10811	64	33	20	181	94	17	16	36	1279	0.999986	6		EUROPE
M14	538-7-73	0.4	538	4	7	10	4	42	25	1	7	73	M14___W023-021219-02.fasta			9	538-7-73	0.36331	538	4	7	10	4	42	25	1	7	73	0.999457	9	0.03669	EUROPE
M14	4279-31-1638	0.28	4279	27	22	22	376	43	86	31	31	1638	M14___B041-110619-02.fasta			9	4279-31-1638	0.248885	4279	27	22	22	376	43	86	31	31	1638	0.999786	9	0.031115	EUROPE
M14	448-102-2353	0.2	448	61	70	22	18	2	74	47	102	2353	M14___B023-070519-01.fasta			9	448-102-2353	0.194841	448	61	70	22	18	2	74	47	102	2353	0.999586	8	0.005159	EUROPE
M14	677-19-276	0.12	677	10	81	50	99	120	76	52	19	276	M14___B046-180619-01.fasta			9	677-19-276	0.120349	677	10	81	50	99	120	76	52	19	276	0.999971	9	0.000349	EUROPE
M15	3536-104-391	0.555556	3536	64	22	20	100	134	160	16	104	391	M15___B054-180619-01.fasta			9	3536-104-391	0.456122	3536	64	22	20	100	134	160	16	104	391	0.997825	9	0.0994336	EUROPE
M15	7355-9-2360	0.277778	7355	8	17	5	2	10	59	23	9	2360	M15___108793.fasta			9	7355-9-2360	0.231978	7355	8	17	5	2	10	59	23	9	2360	0.997825	9	0.0457998	EUROPE
M15	1519-8-302	0.166667	1519	8	1	5	3	2	1	1	8	302	M15___24690.fasta			9	1519-8-302	0.078042	1519	8	1	5	3	2	1	1	8	302	0.999928	5	0.0886247	EUROPE
M16	1519-8-302	0.555556	1519	8	1	5	3	2	1	1	8	302	M16___24690.fasta			9	1519-8-302	0.36384	1519	8	1	5	3	2	1	1	8	302	0.999957	9	0.191716	EUROPE
M16	7355-9-2360	0.277778	7355	8	17	5	2	10	59	23	9	2360	M16___108793.fasta			9	7355-9-2360	0.299913	7355	8	17	5	2	10	59	23	9	2360	0.997741	6	0.0221352	EUROPE
M16	3536-104-391	0.166667	3536	64	22	20	100	134	160	16	104	391	M16___B054-180619-01.fasta			9	3536-104-391	0.176909	3536	64	22	20	100	134	160	16	104	391	0.997599	9	0.0102423	EUROPE
M17	8334-9-98	0.666667	8334	8	17	2	2	10	59	6	9	98	M17___31470.fasta			9	8334-9-98	0.532546	8334	8	17	2	2	10	59	6	9	98	0.999418	9	0.134121	EUROPE
M17	7355-9-2360	0.333333	7355	8	17	5	2	10	59	23	9	2360	M17___108793.fasta			9	7355-9-2360	0.305034	7355	8	17	5	2	10	59	23	9	2360	0.998836	2	0.0282993	EUROPE
M18	8614-36-6	0.705882	8614	2	1	4	28	58	672	58	36	6	M18___B189-130820-01.fasta			9	8614-36-6	0.70645	8614	2	1	4	28	58	672	58	36	6	1	9	0.000567647	EUROPE
M18	6175-9-1625	0.294118	6175	2	1	5	10	608	1	5	9	1625	M18___31558.fasta			9	6175-9-1625	0.255965	6175	2	1	5	10	608	1	5	9	1625	0.999131	7	0.0381526	EUROPE
M19	1540-40-860	0.5	1540	76	33	22	104	43	109	31	40	860	M19___B036-110619-01.fasta			9	1540-40-860	0.256161	1540	76	33	22	104	43	109	31	40	860	0.997491	9	0.243839	EUROPE
M19	8614-36-6	0.35	8614	2	1	4	28	58	672	58	36	6	M19___B189-130820-01.fasta			9	8614-36-6	0.377074	8614	2	1	4	28	58	672	58	36	6	1	9	0.027074	EUROPE
M19	6175-9-1625	0.15	6175	2	1	5	10	608	1	5	9	1625	M19___31558.fasta			9	6175-9-1625	0.14461	6175	2	1	5	10	608	1	5	9	1625	0.99943	7	0.00539	EUROPE
M20	4279-31-1638	0.428571	4279	27	22	22	376	43	86	31	31	1638	M20___B041-110619-02.fasta			9	4279-31-1638	0.425919	4279	27	22	22	376	43	86	31	31	1638	0.999885	9	0.00265243	EUROPE
M20	45-7-49	0.285714	45	4	7	10	4	1	7	1	7	49	M20___B037-110619-01.fasta			9	45-7-49	0.032523	45	4	7	10	4	1	7	1	7	49	0.999641	8	0.253191	EUROPE
M20	2491-11-1634	0.178571	2491	64	22	212	100	134	233	16	11	1634	M20___B028-230519-01.fasta			9	2491-11-1634	0.162104	2491	64	22	212	100	134	233	16	11	1634	0.999986	5	0.0164674	EUROPE
M20	7815-11-2352	0.107143	7815	64	105	203	100	134	94	16	11	2352	M20___B052-180619-01.fasta			9	7815-11-2352	0.092581	7815	64	105	203	100	134	94	16	11	2352	0.999986	4	0.0145619	EUROPE
M20																	6427-11-1157	0.188159	6427	64	95	20	100	514	101	60	11	1157	0.998738	9		EUROPE
Spiked_Mix_P1_2	19-1-7	0.571429	19	2	1	5	3	2	1	5	1	7	Spiked_Mix_P1_2___5895.fasta			9	19-1-7	0.604715	19	2	1	5	3	2	1	5	1	7	1	9	0.0332864	EUROPE
Spiked_Mix_P1_2	3218-1-1146	0.285714	3218	64	70	22	98	123	86	16	1	1146	Spiked_Mix_P1_2___78917.fasta			9	3218-1-1146	0.221851	3218	64	70	22	98	123	86	16	1	1146	0.998692	8	0.0638633	EUROPE
Spiked_Mix_P1_2	5845-1-127	0.142857	5845	18	70	164	97	115	86	47	1	127	Spiked_Mix_P1_2___5097_innuendo.fasta	gltA,porA		7	5528-1-~1661	0.062147	5528	18	70	165	97	115	86	47	1	~1661	0.995111	4	0.0807101	EUROPE
M1	10820-11-1224	0.454545	10820	64	89	319	100	134	103	16	11	1224	M1___B039-110619-03.fasta			9	10820-11-1224	0.533666	10820	64	89	319	100	134	103	16	11	1224	0.999166	9	0.0791205	WITH_INHOUSE
M1	2491-11-1634	0.318182	2491	64	22	212	100	134	233	16	11	1634	M1___B028-230519-01.fasta			9	2491-11-1634	0.22579	2491	64	22	212	100	134	233	16	11	1634	0.997664	4	0.0923918	WITH_INHOUSE
M1	2254-9-1	0.227273	2254	8	2	4	62	4	5	6	9	1	M1___28636.fasta			9	2254-9-1	0.079981	2254	8	2	4	62	4	5	6	9	1	0.998957	7	0.147292	WITH_INHOUSE
M2	448-102-2353	0.444444	448	61	70	22	18	2	74	47	102	2353	M2___B023-070519-01.fasta			9	448-102-2353	0.483742	448	61	70	22	18	2	74	47	102	2353	0.999334	9	0.0392976	WITH_INHOUSE
M2	10815-11-479	0.333333	10815	18	81	68	143	134	153	16	11	479	M2___B051-180619-02.fasta			9	10815-11-479	0.253351	10815	18	81	68	143	134	153	16	11	479	1	9	0.0799823	WITH_INHOUSE
M2	8334-9-98	0.222222	8334	8	17	2	2	10	59	6	9	98	M2___31470.fasta			9	8334-9-98	0.176274	8334	8	17	2	2	10	59	6	9	98	0.999542	9	0.0459482	WITH_INHOUSE
M3	5207-51-2356	0.5	5207	37	187	4	28	19	24	23	51	2356	M3___B193-200820-02.fasta			9	5207-51-2356	0.395036	5207	37	187	4	28	19	24	23	51	2356	1	9	0.104964	WITH_INHOUSE
M3	677-19-276	0.3125	677	10	81	50	99	120	76	52	19	276	M3___B046-180619-01.fasta			9	677-19-276	0.392634	677	10	81	50	99	120	76	52	19	276	0.999958	9	0.080134	WITH_INHOUSE
M3	7355-9-2360	0.1875	7355	8	17	5	2	10	59	23	9	2360	M3___81980.fasta			9	7355-9-2360	0.179687	7355	8	17	5	2	10	59	23	9	2360	0.998622	8	0.007813	WITH_INHOUSE
M4	45-7-49	0.625	45	4	7	10	4	1	7	1	7	49	M4___B037-110619-01.fasta			9	45-7-49	0.027968	45	4	7	10	4	1	7	1	7	49	0.99912	9	0.597032	WITH_INHOUSE
M4	6175-9-1625	0.375	6175	2	1	5	10	608	1	5	9	1625	M4___31558.fasta			9	6175-9-1625	0.295623	6175	2	1	5	10	608	1	5	9	1625	0.9987	9	0.079377	WITH_INHOUSE
M4																	6427-11-1157	0.421015	6427	64	95	20	100	514	101	60	11	1157	0.998868	9		WITH_INHOUSE
M5	6175-9-1625	0.526316	6175	2	1	5	10	608	1	5	9	1625	M5___31558.fasta			9	6175-9-1625	0.430519	6175	2	1	5	10	608	1	5	9	1625	0.998953	9	0.0957968	WITH_INHOUSE
M5	7815-11-2352	0.263158	7815	64	105	203	100	134	94	16	11	2352	M5___B052-180619-01.fasta			9	7815-11-2352	0.202201	7815	64	105	203	100	134	94	16	11	2352	1	9	0.0609569	WITH_INHOUSE
M5	448-102-2353	0.210526	448	61	70	22	18	2	74	47	102	2353	M5___B023-070519-01.fasta			9	448-102-2353	0.187522	448	61	70	22	18	2	74	47	102	2353	0.999162	8	0.0230043	WITH_INHOUSE
M6	4279-31-1638	0.352941	4279	27	22	22	376	43	86	31	31	1638	M6___B041-110619-02.fasta			9	4279-31-1638	0.330104	4279	27	22	22	376	43	86	31	31	1638	0.999832	9	0.0228372	WITH_INHOUSE
M6	122-3-2365	0.294118	122	6	4	5	2	2	1	5	3	2365	M6___111710.fasta	porA		8	122-3-1259	0.286489	122	6	4	5	2	2	1	5	3	1259	1	8	0.00762865	WITH_INHOUSE
M6	951-31-1418	0.235294	951	18	100	82	24	138	116	63	31	1418	M6___B096-300719-02.fasta	porA		8	951-31-2358	0.235217	951	18	100	82	24	138	116	63	31	2358	1	8	7.71176e-05	WITH_INHOUSE
M6	1540-40-860	0.117647	1540	76	33	22	104	43	109	31	40	860	M6___B036-110619-01.fasta			9	1540-40-860	0.069722	1540	76	33	22	104	43	109	31	40	860	0.998492	6	0.0479251	WITH_INHOUSE
M7	1519-8-302	0.470588	1519	8	1	5	3	2	1	1	8	302	M7___41445.fasta	gltA,porA		7	44-8-1	0.364412	44	8	1	6	3	2	1	1	8	1	1	5	0.106176	WITH_INHOUSE
M7	122-3-2365	0.294118	122	6	4	5	2	2	1	5	3	2365	M7___111710.fasta	porA		8	122-3-1259	0.468134	122	6	4	5	2	2	1	5	3	1259	1	8	0.174016	WITH_INHOUSE
M7	2254-9-1	0.235294	2254	8	2	4	62	4	5	6	9	1	M7___111197.fasta	aspA,pgm		7	10089-9-1	0.129654	10089	9	2	4	62	1034	5	6	9	1	0.998758	5	0.10564	WITH_INHOUSE
M8	8334-9-98	0.470588	8334	8	17	2	2	10	59	6	9	98	M8___34431.fasta	gltA		8	400-9-98	0.472772	400	8	17	5	2	10	59	6	9	98	0.999792	9	0.00218376	WITH_INHOUSE
M8	7355-9-2360	0.294118	7355	8	17	5	2	10	59	23	9	2360	M8___81980.fasta			9	7355-9-2360	0.303748	7355	8	17	5	2	10	59	23	9	2360	0.999875	2	0.00963035	WITH_INHOUSE
M8	10846-8-2	0.235294	10846	2	17	5	2	10	12	736	8	2	Closest_match_below_cutoff	aspA,tkt,uncA,porA,fn_gyrA		4																WITH_INHOUSE
M9	2254-9-1	0.5	2254	8	2	4	62	4	5	6	9	1	M9___28636.fasta			9	2254-9-1	0.215386	2254	8	2	4	62	4	5	6	9	1	0.999081	9	0.284614	WITH_INHOUSE
M9	10820-11-1224	0.3125	10820	64	89	319	100	134	103	16	11	1224	M9___B039-110619-03.fasta			9	10820-11-1224	0.456578	10820	64	89	319	100	134	103	16	11	1224	0.999206	9	0.144078	WITH_INHOUSE
M9	2491-11-1634	0.1875	2491	64	22	212	100	134	233	16	11	1634	M9___B028-230519-01.fasta			9	2491-11-1634	0.163615	2491	64	22	212	100	134	233	16	11	1634	0.997743	4	0.023885	WITH_INHOUSE
M10	2491-11-1634	0.454545	2491	64	22	212	100	134	233	16	11	1634	M10___B028-230519-01.fasta			9	2491-11-1634	0.306561	2491	64	22	212	100	134	233	16	11	1634	0.997583	4	0.147984	WITH_INHOUSE
M10	10820-11-1224	0.318182	10820	64	89	319	100	134	103	16	11	1224	M10___B039-110619-03.fasta			9	10820-11-1224	0.407026	10820	64	89	319	100	134	103	16	11	1224	0.999208	9	0.0888442	WITH_INHOUSE
M10	2254-9-1	0.227273	2254	8	2	4	62	4	5	6	9	1	M10___28636.fasta			9	2254-9-1	0.075268	2254	8	2	4	62	4	5	6	9	1	0.998916	9	0.152005	WITH_INHOUSE
M11	10846-8-2	0.625	10846	2	17	5	2	10	12	736	8	2	M11___110083.fasta	uncA		8	10846-8-2	0.273247	10846	2	17	5	2	10	12	6	8	2	0.998116	8	0.351753	WITH_INHOUSE
M11	10818-104-391	0.375	10818	64	22	20	100	134	301	16	104	391	M11___B038-110619-01.fasta			9	10818-104-391	0.316102	10818	64	22	20	100	134	301	16	104	391	1	9	0.058898	WITH_INHOUSE
M11																	10811-36-1279	0.033457	10811	64	33	20	181	94	17	16	36	1279	0.999958	6		WITH_INHOUSE
M12	10846-8-2	0.8	10846	2	17	5	2	10	12	736	8	2	M12___110083.fasta	uncA		8	10846-8-2	0.32261	10846	2	17	5	2	10	12	6	8	2	0.998133	8	0.47739	WITH_INHOUSE
M12	10818-104-391	0.2	10818	64	22	20	100	134	301	16	104	391	M12___B038-110619-01.fasta			9	10818-104-391	0.171294	10818	64	22	20	100	134	301	16	104	391	1	9	0.028706	WITH_INHOUSE
M12																	8343-145-1705	0.011767	8343	64	33	22	100	122	17	16	145	1705	0.994026	2		WITH_INHOUSE
M13	10818-104-391	0.8	10818	64	22	20	100	134	301	16	104	391	M13___B038-110619-01.fasta			9	10818-104-391	0.694807	10818	64	22	20	100	134	301	16	104	391	1	9	0.105193	WITH_INHOUSE
M13	10846-8-2	0.2	10846	2	17	5	2	10	12	736	8	2	M13___110083.fasta	uncA		8	10846-8-2	0.110712	10846	2	17	5	2	10	12	6	8	2	0.998293	8	0.089288	WITH_INHOUSE
M13																	10811-36-1279	0.094038	10811	64	33	20	181	94	17	16	36	1279	1	6		WITH_INHOUSE
M14	538-7-73	0.4	538	4	7	10	4	42	25	1	7	73	M14___W023-021219-02.fasta			9	538-7-73	0.361614	538	4	7	10	4	42	25	1	7	73	0.999206	9	0.038386	WITH_INHOUSE
M14	4279-31-1638	0.28	4279	27	22	22	376	43	86	31	31	1638	M14___B041-110619-02.fasta			9	4279-31-1638	0.243005	4279	27	22	22	376	43	86	31	31	1638	0.999791	9	0.036995	WITH_INHOUSE
M14	448-102-2353	0.2	448	61	70	22	18	2	74	47	102	2353	M14___B023-070519-01.fasta			9	448-102-2353	0.183691	448	61	70	22	18	2	74	47	102	2353	0.999457	8	0.016309	WITH_INHOUSE
M14	677-19-276	0.12	677	10	81	50	99	120	76	52	19	276	M14___B046-180619-01.fasta			9	677-19-276	0.1198	677	10	81	50	99	120	76	52	19	276	0.999958	9	0.0002	WITH_INHOUSE
M15	3536-104-391	0.555556	3536	64	22	20	100	134	160	16	104	391	M15___B054-180619-01.fasta			9	3536-104-391	0.553704	3536	64	22	20	100	134	160	16	104	391	0.999332	9	0.00185156	WITH_INHOUSE
M15	7355-9-2360	0.277778	7355	8	17	5	2	10	59	23	9	2360	M15___81980.fasta			9	7355-9-2360	0.274538	7355	8	17	5	2	10	59	23	9	2360	0.999207	9	0.00323978	WITH_INHOUSE
M15	1519-8-302	0.166667	1519	8	1	5	3	2	1	1	8	302	M15___24690.fasta			9	1519-8-302	0.06017	1519	8	1	5	3	2	1	1	8	302	1	5	0.106497	WITH_INHOUSE
M16	1519-8-302	0.555556	1519	8	1	5	3	2	1	1	8	302	M16___24690.fasta			9	1519-8-302	0.350084	1519	8	1	5	3	2	1	1	8	302	1	9	0.205472	WITH_INHOUSE
M16	7355-9-2360	0.277778	7355	8	17	5	2	10	59	23	9	2360	M16___81980.fasta			9	7355-9-2360	0.336041	7355	8	17	5	2	10	59	23	9	2360	0.999167	6	0.0582632	WITH_INHOUSE
M16	3536-104-391	0.166667	3536	64	22	20	100	134	160	16	104	391	M16___B054-180619-01.fasta			9	3536-104-391	0.208093	3536	64	22	20	100	134	160	16	104	391	0.999292	9	0.0414263	WITH_INHOUSE
M17	8334-9-98	0.666667	8334	8	17	2	2	10	59	6	9	98	M17___31470.fasta			9	8334-9-98	0.535907	8334	8	17	2	2	10	59	6	9	98	0.999668	9	0.13076	WITH_INHOUSE
M17	7355-9-2360	0.333333	7355	8	17	5	2	10	59	23	9	2360	M17___81980.fasta			9	7355-9-2360	0.363695	7355	8	17	5	2	10	59	23	9	2360	0.999834	2	0.0303617	WITH_INHOUSE
M18	8614-36-6	0.705882	8614	2	1	4	28	58	672	58	36	6	M18___B189-130820-01.fasta			9	8614-36-6	0.686047	8614	2	1	4	28	58	672	58	36	6	1	9	0.0198354	WITH_INHOUSE
M18	6175-9-1625	0.294118	6175	2	1	5	10	608	1	5	9	1625	M18___31558.fasta			9	6175-9-1625	0.217447	6175	2	1	5	10	608	1	5	9	1625	0.998832	7	0.0766706	WITH_INHOUSE
M19	1540-40-860	0.5	1540	76	33	22	104	43	109	31	40	860	M19___B036-110619-01.fasta			9	1540-40-860	0.260849	1540	76	33	22	104	43	109	31	40	860	0.997411	9	0.239151	WITH_INHOUSE
M19	8614-36-6	0.35	8614	2	1	4	28	58	672	58	36	6	M19___B189-130820-01.fasta			9	8614-36-6	0.374451	8614	2	1	4	28	58	672	58	36	6	1	9	0.024451	WITH_INHOUSE
M19	6175-9-1625	0.15	6175	2	1	5	10	608	1	5	9	1625	M19___31558.fasta			9	6175-9-1625	0.12079	6175	2	1	5	10	608	1	5	9	1625	0.998956	7	0.02921	WITH_INHOUSE
M20	4279-31-1638	0.428571	4279	27	22	22	376	43	86	31	31	1638	M20___B041-110619-02.fasta			9	4279-31-1638	0.407547	4279	27	22	22	376	43	86	31	31	1638	0.999833	9	0.0210244	WITH_INHOUSE
M20	45-7-49	0.285714	45	4	7	10	4	1	7	1	7	49	M20___B037-110619-01.fasta			9	45-7-49	0.024155	45	4	7	10	4	1	7	1	7	49	0.998998	8	0.261559	WITH_INHOUSE
M20	2491-11-1634	0.178571	2491	64	22	212	100	134	233	16	11	1634	M20___B028-230519-01.fasta			9	2491-11-1634	0.10974	2491	64	22	212	100	134	233	16	11	1634	0.999081	5	0.0688314	WITH_INHOUSE
M20	7815-11-2352	0.107143	7815	64	105	203	100	134	94	16	11	2352	M20___B052-180619-01.fasta			9	7815-11-2352	0.108391	7815	64	105	203	100	134	94	16	11	2352	1	4	0.00124814	WITH_INHOUSE
M20																	6427-11-1157	0.189122	6427	64	95	20	100	514	101	60	11	1157	0.99929	9		WITH_INHOUSE
Spiked_Mix_P1_2	19-1-7	0.571429	19	2	1	5	3	2	1	5	1	7	Spiked_Mix_P1_2___5895.fasta			9	19-1-7	0.601946	19	2	1	5	3	2	1	5	1	7	1	9	0.0305174	WITH_INHOUSE
Spiked_Mix_P1_2	3218-1-1146	0.285714	3218	64	70	22	98	123	86	16	1	1146	Spiked_Mix_P1_2___78917.fasta			9	3218-1-1146	0.234189	3218	64	70	22	98	123	86	16	1	1146	0.998952	8	0.0515253	WITH_INHOUSE
Spiked_Mix_P1_2	5845-1-127	0.142857	5845	18	70	164	97	115	86	47	1	127	Spiked_Mix_P1_2___5097_innuendo.fasta	gltA,porA		7	5528-1-~1661	0.039751	5528	18	70	165	97	115	86	47	1	~1661	0.994971	4	0.103106	WITH_INHOUSE
M1	10820-11-1224	0.454545	10820	64	89	319	100	134	103	16	11	1224	M1___10778.fasta	pgm		8	4835-11-1224	0.54553	4835	64	89	319	100	94	103	16	11	1224	0.999117	8	0.0909845	NO_INHOUSE
M1	2491-11-1634	0.318182	2491	64	22	212	100	134	233	16	11	1634	M1___22260.fasta	porA		8	2491-11-1157	0.227977	2491	64	22	212	100	134	233	16	11	1157	0.997434	4	0.0902048	NO_INHOUSE
M1	2254-9-1	0.227273	2254	8	2	4	62	4	5	6	9	1	M1___28636.fasta			9	2254-9-1	0.084458	2254	8	2	4	62	4	5	6	9	1	0.998949	7	0.142815	NO_INHOUSE
M2	448-102-2353	0.444444	448	61	70	22	18	2	74	47	102	2353	M2___61220.fasta	porA,fn_gyrA		7	448-31-2034	0.471108	448	61	70	22	18	2	74	47	31	2034	0.999155	7	0.0266636	NO_INHOUSE
M2	10815-11-479	0.333333	10815	18	81	68	143	134	153	16	11	479	Closest_match_below_cutoff	gltA,porA,fn_gyrA		6																NO_INHOUSE
M2	8334-9-98	0.222222	8334	8	17	2	2	10	59	6	9	98	M2___31470.fasta			9	8334-9-98	0.167381	8334	8	17	2	2	10	59	6	9	98	0.999535	9	0.0548412	NO_INHOUSE
M2																	1309-60-406	0.197484	1309	18	81	111	143	134	153	16	60	406	0.996326	6		NO_INHOUSE
M3	5207-51-2356	0.5	5207	37	187	4	28	19	24	23	51	2356	Closest_match_below_cutoff	aspA,glnA,gltA,glyA,pgm,tkt,porA,fn_gyrA		1																NO_INHOUSE
M3	677-19-276	0.3125	677	10	81	50	99	120	76	52	19	276	M3___59177.fasta			9	677-19-276	0.387932	677	10	81	50	99	120	76	52	19	276	0.999958	9	0.075432	NO_INHOUSE
M3	7355-9-2360	0.1875	7355	8	17	5	2	10	59	23	9	2360	M3___81980.fasta			9	7355-9-2360	0.147222	7355	8	17	5	2	10	59	23	9	2360	0.998602	9	0.040278	NO_INHOUSE
M4	45-7-49	0.625	45	4	7	10	4	1	7	1	7	49	M4___2699.fasta	porA		8	45-7-2405	0.030102	45	4	7	10	4	1	7	1	7	2405	0.998694	8	0.594898	NO_INHOUSE
M4	6175-9-1625	0.375	6175	2	1	5	10	608	1	5	9	1625	M4___31558.fasta			9	6175-9-1625	0.304286	6175	2	1	5	10	608	1	5	9	1625	0.998652	9	0.070714	NO_INHOUSE
M4																	6427-11-1157	0.408625	6427	64	95	20	100	514	101	60	11	1157	0.998652	9		NO_INHOUSE
M5	6175-9-1625	0.526316	6175	2	1	5	10	608	1	5	9	1625	M5___31558.fasta			9	6175-9-1625	0.426465	6175	2	1	5	10	608	1	5	9	1625	0.998903	9	0.0998508	NO_INHOUSE
M5	7815-11-2352	0.263158	7815	64	105	203	100	134	94	16	11	2352	Closest_match_below_cutoff	glnA,gltA,porA		6																NO_INHOUSE
M5	448-102-2353	0.210526	448	61	70	22	18	2	74	47	102	2353	M5___61220.fasta	porA,fn_gyrA		7	448-31-2034	0.184594	448	61	70	22	18	2	74	47	31	2034	0.99903	6	0.0259323	NO_INHOUSE
M5																	7811-11-2366	0.047181	7811	64	133	203	142	134	160	60	11	2366	0.994432	4		NO_INHOUSE
M5																	1483-11-498	0.021335	1483	64	22	20	100	134	94	16	11	498	0.993715	3		NO_INHOUSE
M6	4279-31-1638	0.352941	4279	27	22	22	376	43	86	31	31	1638	Closest_match_below_cutoff	glyA,pgm,porA,fn_gyrA		5																NO_INHOUSE
M6	122-3-2365	0.294118	122	6	4	5	2	2	1	5	3	2365	M6___111710.fasta	porA		8	122-3-1259	0.26476	122	6	4	5	2	2	1	5	3	1259	1	8	0.0293576	NO_INHOUSE
M6	951-31-1418	0.235294	951	18	100	82	24	138	116	63	31	1418	M6___48448.fasta	porA		8	951-31-2358	0.232926	951	18	100	82	24	138	116	63	31	2358	1	9	0.00236812	NO_INHOUSE
M6	1540-40-860	0.117647	1540	76	33	22	104	43	109	31	40	860	M6___50086.fasta	porA		8	1540-40-1353	0.059934	1540	76	33	22	104	43	109	31	40	1353	0.998139	5	0.0577131	NO_INHOUSE
M6																	8368-39-680	0.164379	8368	27	22	22	104	115	86	31	39	680	0.996869	6		NO_INHOUSE
M7	1519-8-302	0.470588	1519	8	1	5	3	2	1	1	8	302	M7___41445.fasta	gltA,porA		7	44-8-1	0.362064	44	8	1	6	3	2	1	1	8	1	1	5	0.108524	NO_INHOUSE
M7	122-3-2365	0.294118	122	6	4	5	2	2	1	5	3	2365	M7___111710.fasta	porA		8	122-3-1259	0.470508	122	6	4	5	2	2	1	5	3	1259	1	8	0.17639	NO_INHOUSE
M7	2254-9-1	0.235294	2254	8	2	4	62	4	5	6	9	1	M7___111197.fasta	aspA,pgm		7	10089-9-1	0.096389	10089	9	2	4	62	1034	5	6	9	1	0.998744	5	0.138905	NO_INHOUSE
M8	8334-9-98	0.470588	8334	8	17	2	2	10	59	6	9	98	M8___34431.fasta	gltA		8	400-9-98	0.47266	400	8	17	5	2	10	59	6	9	98	0.999789	9	0.00207176	NO_INHOUSE
M8	7355-9-2360	0.294118	7355	8	17	5	2	10	59	23	9	2360	M8___81980.fasta			9	7355-9-2360	0.303226	7355	8	17	5	2	10	59	23	9	2360	0.999873	2	0.00910835	NO_INHOUSE
M8	10846-8-2	0.235294	10846	2	17	5	2	10	12	736	8	2	Closest_match_below_cutoff	aspA,tkt,uncA,porA,fn_gyrA		4																NO_INHOUSE
M9	2254-9-1	0.5	2254	8	2	4	62	4	5	6	9	1	M9___28636.fasta			9	2254-9-1	0.169325	2254	8	2	4	62	4	5	6	9	1	0.999073	9	0.330675	NO_INHOUSE
M9	10820-11-1224	0.3125	10820	64	89	319	100	134	103	16	11	1224	M9___10778.fasta	pgm		8	4835-11-1224	0.458647	4835	64	89	319	100	94	103	16	11	1224	0.999157	8	0.146147	NO_INHOUSE
M9	2491-11-1634	0.1875	2491	64	22	212	100	134	233	16	11	1634	M9___22260.fasta	porA		8	2491-11-1157	0.169633	2491	64	22	212	100	134	233	16	11	1157	0.997598	4	0.017867	NO_INHOUSE
M10	2491-11-1634	0.454545	2491	64	22	212	100	134	233	16	11	1634	M10___22260.fasta	porA		8	2491-11-1157	0.313795	2491	64	22	212	100	134	233	16	11	1157	0.997383	4	0.14075	NO_INHOUSE
M10	10820-11-1224	0.318182	10820	64	89	319	100	134	103	16	11	1224	M10___10778.fasta	pgm		8	4835-11-1224	0.410728	4835	64	89	319	100	94	103	16	11	1224	0.999198	8	0.0925462	NO_INHOUSE
M10	2254-9-1	0.227273	2254	8	2	4	62	4	5	6	9	1	M10___28636.fasta			9	2254-9-1	0.063004	2254	8	2	4	62	4	5	6	9	1	0.998902	9	0.164269	NO_INHOUSE
M11	10846-8-2	0.625	10846	2	17	5	2	10	12	736	8	2	M11___110083.fasta	uncA		8	10846-8-2	0.298958	10846	2	17	5	2	10	12	6	8	2	0.998046	8	0.326042	NO_INHOUSE
M11	10818-104-391	0.375	10818	64	22	20	100	134	301	16	104	391	Closest_match_below_cutoff	glnA,pgm,tkt,uncA,porA,fn_gyrA		3																NO_INHOUSE
M11																	7817-11-2531	0.042373	7817	64	22	460	351	752	187	60	11	2531	0.993924	2		NO_INHOUSE
M11																	6427-11-1157	0.042354	6427	64	95	20	100	514	101	60	11	1157	0.993542	2		NO_INHOUSE
M11																	6460-11-1705	0.020085	6460	64	33	22	98	94	17	16	11	1705	0.994604	4		NO_INHOUSE
M12	10846-8-2	0.8	10846	2	17	5	2	10	12	736	8	2	M12___110083.fasta	uncA		8	10846-8-2	0.330831	10846	2	17	5	2	10	12	6	8	2	0.998069	8	0.469169	NO_INHOUSE
M12	10818-104-391	0.2	10818	64	22	20	100	134	301	16	104	391	Closest_match_below_cutoff	glyA,tkt,porA,fn_gyrA		5																NO_INHOUSE
M12																	7803-11-498	0.016719	7803	64	22	20	351	134	94	16	11	498	0.993411	6		NO_INHOUSE
M13	10818-104-391	0.8	10818	64	22	20	100	134	301	16	104	391	Closest_match_below_cutoff	glnA,pgm,tkt,uncA,porA,fn_gyrA		3																NO_INHOUSE
M13	10846-8-2	0.2	10846	2	17	5	2	10	12	736	8	2	M13___110083.fasta	uncA		8	10846-8-2	0.107175	10846	2	17	5	2	10	12	6	8	2	0.998237	8	0.092825	NO_INHOUSE
M13																	6427-11-1157	0.100938	6427	64	95	20	100	514	101	60	11	1157	0.993158	4		NO_INHOUSE
M13																	6460-11-1705	0.028554	6460	64	33	22	98	94	17	16	11	1705	0.993662	3		NO_INHOUSE
M14	538-7-73	0.4	538	4	7	10	4	42	25	1	7	73	M14___107515.fasta			9	538-7-73	0.361624	538	4	7	10	4	42	25	1	7	73	0.999236	9	0.038376	NO_INHOUSE
M14	4279-31-1638	0.28	4279	27	22	22	376	43	86	31	31	1638	Closest_match_below_cutoff	glyA,pgm,porA,fn_gyrA		5																NO_INHOUSE
M14	448-102-2353	0.2	448	61	70	22	18	2	74	47	102	2353	M14___61220.fasta	porA,fn_gyrA		7	448-31-2034	0.190734	448	61	70	22	18	2	74	47	31	2034	0.999321	8	0.009266	NO_INHOUSE
M14	677-19-276	0.12	677	10	81	50	99	120	76	52	19	276	M14___59177.fasta			9	677-19-276	0.118982	677	10	81	50	99	120	76	52	19	276	0.999958	9	0.001018	NO_INHOUSE
M14																	8368-39-680	0.092644	8368	27	22	22	104	115	86	31	39	680	0.996563	4		NO_INHOUSE
M15	3536-104-391	0.555556	3536	64	22	20	100	134	160	16	104	391	Closest_match_below_cutoff	glnA,pgm,tkt,uncA,porA,fn_gyrA		3																NO_INHOUSE
M15	7355-9-2360	0.277778	7355	8	17	5	2	10	59	23	9	2360	M15___81980.fasta			9	7355-9-2360	0.270009	7355	8	17	5	2	10	59	23	9	2360	0.999198	9	0.00776878	NO_INHOUSE
M15	1519-8-302	0.166667	1519	8	1	5	3	2	1	1	8	302	M15___24690.fasta			9	1519-8-302	0.075575	1519	8	1	5	3	2	1	1	8	302	1	5	0.0910917	NO_INHOUSE
M15																	6427-11-1157	0.092907	6427	64	95	20	100	514	101	60	11	1157	0.990839	3		NO_INHOUSE
M15																	8769-11-2372	0.043592	8769	216	22	85	142	134	101	16	11	2372	0.991388	2		NO_INHOUSE
M16	1519-8-302	0.555556	1519	8	1	5	3	2	1	1	8	302	M16___24690.fasta			9	1519-8-302	0.356749	1519	8	1	5	3	2	1	1	8	302	1	9	0.198807	NO_INHOUSE
M16	7355-9-2360	0.277778	7355	8	17	5	2	10	59	23	9	2360	M16___81980.fasta			9	7355-9-2360	0.329602	7355	8	17	5	2	10	59	23	9	2360	0.999156	6	0.0518242	NO_INHOUSE
M16	3536-104-391	0.166667	3536	64	22	20	100	134	160	16	104	391	Closest_match_below_cutoff	glnA,pgm,tkt,uncA,porA,fn_gyrA		3																NO_INHOUSE
M16																	6427-11-1157	0.038271	6427	64	95	20	100	514	101	60	11	1157	0.991349	3		NO_INHOUSE
M17	8334-9-98	0.666667	8334	8	17	2	2	10	59	6	9	98	M17___31470.fasta			9	8334-9-98	0.538226	8334	8	17	2	2	10	59	6	9	98	0.999664	9	0.128441	NO_INHOUSE
M17	7355-9-2360	0.333333	7355	8	17	5	2	10	59	23	9	2360	M17___81980.fasta			9	7355-9-2360	0.365082	7355	8	17	5	2	10	59	23	9	2360	0.999832	2	0.0317487	NO_INHOUSE
M18	8614-36-6	0.705882	8614	2	1	4	28	58	672	58	36	6	M18___80888.fasta			9	8614-36-6	0.687348	8614	2	1	4	28	58	672	58	36	6	1	9	0.0185344	NO_INHOUSE
M18	6175-9-1625	0.294118	6175	2	1	5	10	608	1	5	9	1625	M18___31558.fasta			9	6175-9-1625	0.204884	6175	2	1	5	10	608	1	5	9	1625	0.998817	7	0.0892336	NO_INHOUSE
M19	1540-40-860	0.5	1540	76	33	22	104	43	109	31	40	860	M19___50086.fasta	porA		8	1540-40-1353	0.239759	1540	76	33	22	104	43	109	31	40	1353	0.996986	8	0.260241	NO_INHOUSE
M19	8614-36-6	0.35	8614	2	1	4	28	58	672	58	36	6	M19___80888.fasta			9	8614-36-6	0.37312	8614	2	1	4	28	58	672	58	36	6	1	9	0.02312	NO_INHOUSE
M19	6175-9-1625	0.15	6175	2	1	5	10	608	1	5	9	1625	M19___31558.fasta			9	6175-9-1625	0.124406	6175	2	1	5	10	608	1	5	9	1625	0.998939	7	0.025594	NO_INHOUSE
M20	4279-31-1638	0.428571	4279	27	22	22	376	43	86	31	31	1638	Closest_match_below_cutoff	glyA,pgm,porA,fn_gyrA		5																NO_INHOUSE
M20	45-7-49	0.285714	45	4	7	10	4	1	7	1	7	49	M20___107526.fasta	porA		8	45-7-180	0.032992	45	4	7	10	4	1	7	1	7	180	0.998946	7	0.252722	NO_INHOUSE
M20	2491-11-1634	0.178571	2491	64	22	212	100	134	233	16	11	1634	M20___22260.fasta	porA		8	2491-11-1157	0.117335	2491	64	22	212	100	134	233	16	11	1157	0.998988	4	0.0612364	NO_INHOUSE
M20	7815-11-2352	0.107143	7815	64	105	203	100	134	94	16	11	2352	Closest_match_below_cutoff	glnA,gltA,tkt,porA		5																NO_INHOUSE
M20																	8368-39-680	0.204022	8368	27	22	22	104	115	86	31	39	680	0.996669	5		NO_INHOUSE
M20																	6427-11-1157	0.185946	6427	64	95	20	100	514	101	60	11	1157	0.999199	9		NO_INHOUSE
M20																	3925-31-947	0.025979	3925	27	99	22	356	43	375	31	31	947	0.992369	2		NO_INHOUSE
Spiked_Mix_P1_2	19-1-7	0.571429	19	2	1	5	3	2	1	5	1	7	Spiked_Mix_P1_2___16167.fasta	fn_gyrA		8	19-58-7	0.599431	19	2	1	5	3	2	1	5	58	7	1	8	0.0280024	NO_INHOUSE
Spiked_Mix_P1_2	3218-1-1146	0.285714	3218	64	70	22	98	123	86	16	1	1146	Spiked_Mix_P1_2___78917.fasta			9	3218-1-1146	0.230282	3218	64	70	22	98	123	86	16	1	1146	0.998854	8	0.0554323	NO_INHOUSE
Spiked_Mix_P1_2	5845-1-127	0.142857	5845	18	70	164	97	115	86	47	1	127	Spiked_Mix_P1_2___5097_innuendo.fasta	gltA,porA		7	5528-1-~1661	0.038536	5528	18	70	165	97	115	86	47	1	~1661	0.994697	4	0.104321	NO_INHOUSE

## Sheet: additional_tests_contamination_
Cluster_member	seqID	sampleID	SNP_clusterID	abundance	max_ident	hits_summed_score	n_hits_score	unmatched_alleles	matched_alleles	mean_query_ident	mean_template_ident	qvalue_depth_score	aspA	glnA	gltA	glyA	pgm	tkt	uncA	porA	fn_gyrA	abundance_rank	alleles_seen_before	corscore
B037-110619-01.fasta	B037-110619-02	B037-110619-02	58	0.878896	0.999443	363732	9		aspA,glnA,gltA,glyA,pgm,tkt,uncA,porA,fn_gyrA	100	100	492.89	4	7	10	4	1	7	1	49	7	1	0	9
78916.fasta	B037-110619-02	B037-110619-02	691	0.020384	0.986056	3682	5	aspA,tkt,porA,fn_gyrA	glnA,gltA,glyA,pgm,uncA	100	65.208	389.255	64	95	20	100	514	101	60	1157	11	3	0	5
B038-110619-01.fasta	B038-110619-01	B038-110619-01	352	0.916311	0.999957	165123	9		aspA,glnA,gltA,glyA,pgm,tkt,uncA,porA,fn_gyrA	100	100	495.355	64	22	20	100	134	301	16	391	104	1	0	9
B038-110619-02.fasta	B038-110619-01	B038-110619-01	712	0.08031	0.997395	65727	9		aspA,glnA,gltA,glyA,pgm,tkt,uncA,porA,fn_gyrA	100	91.4444	466.527	64	33	20	181	94	17	16	1279	36	2	3	6
