# Supplementary material for: Metagenomic Strain-Typing Combined with Isolate Sequencing Provides Increased Resolution of the Genetic Diversity of Campylobacter jejuni Carriage in Wild Birds
Source: Microorganisms. 2023 Jan 3;11(1):121. doi: 10.3390/microorganisms11010121 (PMC9860660; doi:10.3390/microorganisms11010121)
Supplement: Supplementary file 1 [file microorganisms-11-00121-s001.zip › Supplementary_Data_S4.xlsx]

## Sheet: Isolate Comparison
Strain ID	sampleID	Sampling type	Origin	Identification	ST.x	CC	aspA.x	glnA.x	gltA.x	glyA.x	pgm.x	tkt.x	uncA.x	Complex Type	fn_gyrA.x	porA.x	genome	MG_available	date	Sampling location	Cluster_member	abundance	SNP_clusterID	n_matches	unmatched_alleles_truthcomp	seqID	max_ident	hits_summed_score	n_hits_score	unmatched_alleles	matched_alleles	mean_query_ident	mean_template_ident	qvalue_depth_score	aspA.y	glnA.y	gltA.y	glyA.y	pgm.y	tkt.y	uncA.y	porA.y	fn_gyrA.y	abundance_rank	alleles_seen_before	corscore	ST.y	profile	match_type
B015-230519-01	B015	Bird	Cygnus	C. jejuni	45	ST-45 complex	4	7	10	4	1	7	1	2052	7	467	B015-230519-01.fasta	TRUE	2019-05-23T00:00:00Z	Dudelange	B015-230519-01	0.875447	155	9		B015	0.998055	11621274	9		aspA,glnA,gltA,glyA,pgm,tkt,uncA,porA,fn_gyrA	100	100	490.637	4	7	10	4	1	7	1	467	7	1	0	9	45	B015___4___7___10___4___1___7___1___467___7	genome match
B021-070519-01	B021	Bird	Corvus corone	C. jejuni	48	ST-48 complex	2	4	1	2	7	1	5	153	3	7	B021-070519-01.fasta	TRUE	2019-05-07T00:00:00Z	Dudelange	B021-070519-01	0.526475	2	9		21-B021	0.999568	1989308	9		aspA,glnA,gltA,glyA,pgm,tkt,uncA,porA,fn_gyrA	100	100	490.924	2	4	1	2	7	1	5	7	3	1	0	9	48	B021___2___4___1___2___7___1___5___7___3	genome match
B023-070519-01	B023	Bird	Corvus corone	C. jejuni	448	?	61	70	22	18	2	74	47	2154	102	2353	B023-070519-01.fasta	TRUE	2019-05-07T00:00:00Z	Dudelange	B023-070519-01	0.96501	206	9		21-B023	0.997959	3317275	9		aspA,glnA,gltA,glyA,pgm,tkt,uncA,porA,fn_gyrA	100	100	496.054	61	70	22	18	2	74	47	2353	102	1	0	9	448	B023___61___70___22___18___2___74___47___2353___102	genome match
B026-230519-01	B026	Bird	Pica pica	C. jejuni	448	?	61	70	22	18	2	74	47	2154	102	2353	B026-230519-01.fasta	TRUE	2019-05-23T00:00:00Z	Dudelange	B023-070519-01	0.959376	206	9		21-B026	0.997946	3082855	9		aspA,glnA,gltA,glyA,pgm,tkt,uncA,porA,fn_gyrA	100	100	496.064	61	70	22	18	2	74	47	2353	102	1	0	9	448	B026___61___70___22___18___2___74___47___2353___102	9MLST match
B028-230519-01	B028	Bird	Corvus corone	C. jejuni	2491	?	64	22	212	100	134	233	16	2156	11	1634	B028-230519-01.fasta	TRUE	2019-05-23T00:00:00Z	Dudelange	B028-230519-01	0.275546	711	9		B028	0.999971	1299225	8	aspA	glnA,gltA,glyA,pgm,tkt,uncA,porA,fn_gyrA	100	98.585	483.84	64	22	212	100	134	233	16	1634	11	2	0	8	2491	B028___64___22___212___100___134___233___16___1634___11	genome match
B029-110619-02	B029	Bird	Pica pica	C. jejuni	448	?	61	70	22	18	2	74	47	2624	31	860	B029-110619-02.fasta	TRUE	2019-06-11T00:00:00Z	Dudelange	B029-110619-02	0.985637	351	9		21-B029	0.999942	3824715	9		aspA,glnA,gltA,glyA,pgm,tkt,uncA,porA,fn_gyrA	100	100	491.909	61	70	22	18	2	74	47	860	31	1	0	9	448	B029___61___70___22___18___2___74___47___860___31	genome match
B036-110619-03	B036	Bird	Corvus monedula	C. jejuni	10813	?	64	22	148	100	94	187	16	2157	11	2351	B036-110619-03.fasta	TRUE	2019-06-11T00:00:00Z	Dudelange	B050-180619-01	0.360182	715	9		B036	0.999942	2454784	9		aspA,glnA,gltA,glyA,pgm,tkt,uncA,porA,fn_gyrA	100	100	488.792	64	22	148	100	94	187	16	2351	11	1	0	9	10813	B036___64___22___148___100___94___187___16___2351___11	9MLST match
B036-110619-01	B036	Bird	Corvus monedula	C. jejuni	1540	ST-1275 complex	76	33	22	104	43	109	31	2157	40	860	B036-110619-01.fasta	TRUE	2019-06-11T00:00:00Z	Dudelange	B036-110619-01	0.213057	318	9		B036	0.997971	1948995	9		aspA,glnA,gltA,glyA,pgm,tkt,uncA,porA,fn_gyrA	100	100	486.922	76	33	22	104	43	109	31	860	40	2	0	9	1540	B036___76___33___22___104___43___109___31___860___40	genome match
B037-110619-01	B037	Bird	Corvus monedula	C. jejuni	45	ST-45 complex	4	7	10	4	1	7	1	2158	7	49	B037-110619-01.fasta	TRUE	2019-06-11T00:00:00Z	Dudelange	B037-110619-01	0.158265	58	9		B037	0.999597	393257	9		aspA,glnA,gltA,glyA,pgm,tkt,uncA,porA,fn_gyrA	100	97.9389	463.595	4	7	10	4	1	7	1	49	7	2	0	9	45	B037___4___7___10___4___1___7___1___49___7	genome match
B038-110619-03	B038	Bird	Corvus monedula	C. jejuni	10817	?	258	174	154	193	336	421	131	2161	103	2354	B038-110619-03.fasta	TRUE	2019-06-11T00:00:00Z	Dudelange	NA	NA	NA	0	aspA,glnA,gltA,glyA,pgm,tkt,uncA,porA,fn_gyrA	NA	NA	NA	NA	NA	NA	NA	NA	NA	NA	NA	NA	NA	NA	NA	NA	NA	NA	NA	NA	NA	NA	NA	false negative
B038-110619-01	B038	Bird	Corvus monedula	C. jejuni	10818	?	64	22	20	100	134	301	16	2159	104	391	B038-110619-01.fasta	TRUE	2019-06-11T00:00:00Z	Dudelange	B054-180619-01	0.017851	352	8	tkt	21-B038	0.999036	1018605	9		aspA,glnA,gltA,glyA,pgm,tkt,uncA,porA,fn_gyrA	100	97.2644	405.379	64	22	20	100	134	160	16	391	104	3	4	5	3536	B038___64___22___20___100___134___160___16___391___104	partial match
B038-110619-02	B038	Bird	Corvus monedula	C. jejuni	10811	?	64	33	20	181	94	17	16	2160	36	1279	B038-110619-02.fasta	TRUE	2019-06-11T00:00:00Z	Dudelange	B038-110619-02	0.747846	712	9		21-B038	0.999957	2689473	9		aspA,glnA,gltA,glyA,pgm,tkt,uncA,porA,fn_gyrA	100	100	491.626	64	33	20	181	94	17	16	1279	36	1	0	9	10811	B038___64___33___20___181___94___17___16___1279___36	genome match
B039-110619-03	B039	Bird	Corvus monedula	C. jejuni	10820	?	64	89	319	100	134	103	16	2162	11	1224	B039-110619-03.fasta	TRUE	2019-06-11T00:00:00Z	Dudelange	B039-110619-03	0.661469	239	9		21-B039	0.998704	5175304	9		aspA,glnA,gltA,glyA,pgm,tkt,uncA,porA,fn_gyrA	100	100	491.657	64	89	319	100	134	103	16	1224	11	1	0	9	10820	B039___64___89___319___100___134___103___16___1224___11	genome match
B045-180619-01	B045	Bird	Corvus monedula	C. jejuni	464	ST-464 complex	24	2	2	2	10	3	1	596	3	2348	B045-180619-01.fasta	TRUE	2019-06-18T00:00:00Z	Dudelange	B045-180619-01	0.45866	29	9		B045	0.994732	4019471	9		aspA,glnA,gltA,glyA,pgm,tkt,uncA,porA,fn_gyrA	100	100	491.126	24	2	2	2	10	3	1	2348	3	1	0	9	464	B045___24___2___2___2___10___3___1___2348___3	genome match
B047-180619-01	B047	Bird	Falco	C. jejuni	19	ST-21 complex	2	1	5	3	2	1	5	2165	8	327	B047-180619-01.fasta	TRUE	2019-06-18T00:00:00Z	Dudelange	B108-130819-01	0.665685	94	9		B047	0.995395	6990574	9		aspA,glnA,gltA,glyA,pgm,tkt,uncA,porA,fn_gyrA	100	100	490.611	2	1	5	3	2	1	5	327	8	1	0	9	19	B047___2___1___5___3___2___1___5___327___8	9MLST match
B050-180619-02	B050	Bird	Corvus monedula	C. jejuni	1080	?	10	2	107	137	120	76	1	2301	74	130	B050-180619-02.fasta	TRUE	2019-06-18T00:00:00Z	Dudelange	B300-140421-01	0.169744	731	9		B050	0.999841	894039	9		aspA,glnA,gltA,glyA,pgm,tkt,uncA,porA,fn_gyrA	100	100	473.991	10	2	107	137	120	76	1	130	74	2	0	9	1080	B050___10___2___107___137___120___76___1___130___74	9MLST match
B050-180619-01	B050	Bird	Corvus monedula	C. jejuni	10813	?	64	22	148	100	94	187	16	2166	11	2351	B050-180619-01.fasta	TRUE	2019-06-18T00:00:00Z	Dudelange	B050-180619-01	0.769245	715	9		B050	1	5832857	9		aspA,glnA,gltA,glyA,pgm,tkt,uncA,porA,fn_gyrA	100	100	490.223	64	22	148	100	94	187	16	2351	11	1	0	9	10813	B050___64___22___148___100___94___187___16___2351___11	genome match
B051-180619-02	B051	Bird	Corvus corone	C. jejuni	10815	?	18	81	68	143	134	153	16	2167	11	479	B051-180619-02.fasta	TRUE	2019-06-18T00:00:00Z	Dudelange	B051-180619-02	0.468651	716	9		21-B051	1	771349	9		aspA,glnA,gltA,glyA,pgm,tkt,uncA,porA,fn_gyrA	100	100	490.726	18	81	68	143	134	153	16	479	11	1	0	9	10815	B051___18___81___68___143___134___153___16___479___11	genome match
B052-180619-01	B052	Bird	Corvus monedula	C. jejuni	7815	?	64	105	203	100	134	94	16	2168	11	2352	B052-180619-01.fasta	TRUE	2019-06-18T00:00:00Z	Dudelange	B052-180619-01	0.305683	717	9		21-B052	0.999971	2208875	9		aspA,glnA,gltA,glyA,pgm,tkt,uncA,porA,fn_gyrA	100	99.6044	492.663	64	105	203	100	134	94	16	2352	11	2	4	5	7815	B052___64___105___203___100___134___94___16___2352___11	genome match
B054-180619-01	B054	Bird	Corvus corone	C. jejuni	3536	?	64	22	20	100	134	160	16	2169	104	391	B054-180619-01.fasta	TRUE	2019-06-18T00:00:00Z	Dudelange	B054-180619-01	0.018203	352	9		B054	0.997467	1506057	9		aspA,glnA,gltA,glyA,pgm,tkt,uncA,porA,fn_gyrA	100	99.5533	407.655	64	22	20	100	134	160	16	391	104	3	2	7	3536	B054___64___22___20___100___134___160___16___391___104	genome match
B054-180619-02	B054	Bird	Corvus corone	C. jejuni	801	?	64	70	68	97	122	106	16	2598	36	127	B054-180619-02.fasta	TRUE	2019-06-18T00:00:00Z	Dudelange	B113-130819-01	0.075854	720	9		B054	0.999986	2851339	9		aspA,glnA,gltA,glyA,pgm,tkt,uncA,porA,fn_gyrA	100	100	473.857	64	70	68	97	122	106	16	127	36	2	4	5	801	B054___64___70___68___97___122___106___16___127___36	9MLST match
B063-020719-02	B063	Bird	Apus apus	C. jejuni	22	ST-22 complex	1	3	6	4	3	3	3	277	8	70	B063-020719-02.fasta	TRUE	2019-07-02T00:00:00Z	Dudelange	14651	0.050952	16	8	fn_gyrA	21-B063	0.997824	897586	9		aspA,glnA,gltA,glyA,pgm,tkt,uncA,porA,fn_gyrA	100	94.8633	326.29	1	3	6	4	3	3	3	70	1	4	2	7	22	B063___1___3___6___4___3___3___3___70___1	partial match
B063-020719-01	B063	Bird	Apus apus	C. jejuni	11384	ST-177 complex	17	2	670	5	8	2	4	2170	31	236	B063-020719-01.fasta	TRUE	2019-07-02T00:00:00Z	Dudelange	B103-300719-02	0.103537	226	8	gltA	21-B063	0.997478	981599	9		aspA,glnA,gltA,glyA,pgm,tkt,uncA,porA,fn_gyrA	100	96.39	435.391	17	2	8	5	8	2	4	236	31	3	0	9	177	B063___17___2___8___5___8___2___4___236___31	partial match
B067-020719-01	B067	Bird	Pica pica	C. jejuni	383	ST-283 complex	4	7	12	4	42	51	1	251	1	73	B067-020719-01.fasta	TRUE	2019-07-02T00:00:00Z	Dudelange	B067-020719-01	0.183004	21	9		21-B067	0.999438	1632758	9		aspA,glnA,gltA,glyA,pgm,tkt,uncA,porA,fn_gyrA	100	99.6511	470.969	4	7	12	4	42	51	1	73	1	2	1	8	383	B067___4___7___12___4___42___51___1___73___1	genome match
B068-020719-02	B068	Bird	Pica pica	C. jejuni	383	ST-283 complex	4	7	12	4	42	51	1	251	1	73	B068-020719-02.fasta	TRUE	2019-07-02T00:00:00Z	Dudelange	B067-020719-01	0.708031	21	9		21-B068	0.999353	4780879	9		aspA,glnA,gltA,glyA,pgm,tkt,uncA,porA,fn_gyrA	100	100	489.246	4	7	12	4	42	51	1	73	1	1	0	9	383	B068___4___7___12___4___42___51___1___73___1	9MLST match
B071-020719-01	B071	Bird	Corvus corone	C. jejuni	45	ST-45 complex	4	7	10	4	1	7	1	2171	7	44	B071-020719-01.fasta	TRUE	2019-07-02T00:00:00Z	Dudelange	B072-020719-02	0.99791	36	9		21-B071	0.999827	3624385	9		aspA,glnA,gltA,glyA,pgm,tkt,uncA,porA,fn_gyrA	100	100	492.27	4	7	10	4	1	7	1	44	7	1	0	9	45	B071___4___7___10___4___1___7___1___44___7	9MLST match
B083-160719-02	B083	Bird	Falco	C. jejuni	383	ST-283 complex	4	7	12	4	42	51	1	251	1	73	B083-160719-02.fasta	TRUE	2019-07-15T00:00:00Z	Dudelange	B067-020719-01	0.809859	21	9		21-B083	0.997323	4291952	9		aspA,glnA,gltA,glyA,pgm,tkt,uncA,porA,fn_gyrA	100	100	489.379	4	7	12	4	42	51	1	73	1	1	0	9	383	B083___4___7___12___4___42___51___1___73___1	9MLST match
B086-160719-01	B086	Bird	Columba	C. jejuni	383	ST-283 complex	4	7	12	4	42	51	1	251	1	73	B086-160719-01.fasta	TRUE	2019-07-15T00:00:00Z	Dudelange	B067-020719-01	0.823478	21	9		21-B086	0.997558	1914340	9		aspA,glnA,gltA,glyA,pgm,tkt,uncA,porA,fn_gyrA	100	100	489.285	4	7	12	4	42	51	1	73	1	1	0	9	383	B086___4___7___12___4___42___51___1___73___1	9MLST match
B096-300719-02	B096	Bird	Corvus corone	C. jejuni	951	?	18	100	82	24	138	116	63	2277	31	2358	B096-300719-02.fasta	TRUE	2019-07-30T00:00:00Z	Dudelange	B096-300719-02	1	718	9		21-B096	0.999986	2110629	9		aspA,glnA,gltA,glyA,pgm,tkt,uncA,porA,fn_gyrA	100	100	496.241	18	100	82	24	138	116	63	2358	31	1	0	9	951	B096___18___100___82___24___138___116___63___2358___31	genome match
B100-300719-02	B100	Bird	Apus apus	C. jejuni	475	ST-48 complex	2	4	1	4	19	62	5	827	5	67	B100-300719-02.fasta	TRUE	2019-07-30T00:00:00Z	Dudelange	NA	NA	NA	1	aspA,glnA,gltA,pgm,tkt,uncA,porA,fn_gyrA	NA	NA	NA	NA	NA	NA	NA	NA	NA	NA	NA	NA	NA	NA	NA	NA	NA	NA	NA	NA	NA	NA	NA	false negative
B100-300719-01	B100	Bird	Apus apus	C. jejuni	383	ST-283 complex	4	7	12	4	42	51	1	251	1	73	B100-300719-01.fasta	TRUE	2019-07-30T00:00:00Z	Dudelange	B067-020719-01	0.825064	21	9		B100	0.997546	569431	9		aspA,glnA,gltA,glyA,pgm,tkt,uncA,porA,fn_gyrA	100	100	489.42	4	7	12	4	42	51	1	73	1	1	0	9	383	B100___4___7___12___4___42___51___1___73___1	9MLST match
B103-300719-02	B103	Bird	Turdus	C. jejuni	177	ST-177 complex	17	2	8	5	8	2	4	2172	31	236	B103-300719-02.fasta	TRUE	2019-07-30T00:00:00Z	Dudelange	B063-020719-01	0.037389	226	8	gltA	21-B103	0.998448	80410	8	glnA	aspA,gltA,glyA,pgm,tkt,uncA,porA,fn_gyrA	100	95.0312	407.096	17	2	670	5	8	2	4	236	31	3	0	8	11384	B103___17___2___670___5___8___2___4___236___31	partial match
B112-130819-01	B112	Bird	Corvus corone	C. jejuni	7882	?	64	583	22	111	122	303	16	2599	36	2357	B112-130819-01.fasta	TRUE	2019-08-13T00:00:00Z	Dudelange	B112-130819-01	1	719	9		21-B112	0.999971	3159542	9		aspA,glnA,gltA,glyA,pgm,tkt,uncA,porA,fn_gyrA	100	100	495.14	64	583	22	111	122	303	16	2357	36	1	0	9	7882	B112___64___583___22___111___122___303___16___2357___36	genome match
B114-130819-01	B114	Bird	Turdus	C. jejuni	10810	?	94	117	90	125	1094	147	100	2173	101	2355	B114-130819-01.fasta	TRUE	2019-08-13T00:00:00Z	Dudelange	B114-130819-01	0.895926	721	9		21-B114	1	2488218	9		aspA,glnA,gltA,glyA,pgm,tkt,uncA,porA,fn_gyrA	100	100	495.795	94	117	90	125	1094	147	100	2355	101	1	0	9	10810	B114___94___117___90___125___1094___147___100___2355___101	genome match
B114-130819-03	B114	Bird	Turdus	C. jejuni	1277	?	96	135	99	136	183	140	113	2600	105	2359	B114-130819-03.fasta	TRUE	2019-08-13T00:00:00Z	Dudelange	B114-130819-03	0.104074	722	9		21-B114	0.999986	127038	9		aspA,glnA,gltA,glyA,pgm,tkt,uncA,porA,fn_gyrA	100	95.7978	430.919	96	135	99	136	183	140	113	2359	105	2	0	9	1277	B114___96___135___99___136___183___140___113___2359___105	genome match
B119-270819-01	B119	Bird	Pica pica	C. jejuni	11004	?	15	33	72	875	753	103	16	2601	106	1772	B119-270819-01.fasta	TRUE	2019-08-27T00:00:00Z	Dudelange	B119-270819-01	1	723	9		21-B119	0.999986	4394439	9		aspA,glnA,gltA,glyA,pgm,tkt,uncA,porA,fn_gyrA	100	100	496.154	15	33	72	875	753	103	16	1772	106	1	0	9	11004	B119___15___33___72___875___753___103___16___1772___106	genome match
B121-270819-02	B121	Bird	Corvus corone	C. jejuni	6591	?	64	105	20	77	94	103	16	2602	11	1634	B121-270819-02.fasta	TRUE	2019-08-27T00:00:00Z	Dudelange	B121-270819-02	1	724	9		21-B121	0.999971	2208442	9		aspA,glnA,gltA,glyA,pgm,tkt,uncA,porA,fn_gyrA	100	100	495.302	64	105	20	77	94	103	16	1634	11	1	0	9	6591	B121___64___105___20___77___94___103___16___1634___11	genome match
B122-270819-02	B122	Bird	Buteo	C. jejuni	19	ST-21 complex	2	1	5	3	2	1	5	2165	8	327	B122-270819-02.fasta	TRUE	2019-08-27T00:00:00Z	Dudelange	B108-130819-01	0.633001	94	9		21-B122	0.997893	298155	9		aspA,glnA,gltA,glyA,pgm,tkt,uncA,porA,fn_gyrA	100	100	492.107	2	1	5	3	2	1	5	327	8	1	0	9	19	B122___2___1___5___3___2___1___5___327___8	9MLST match
B123-270819-01	B123	Bird	Falco	C. jejuni	19	ST-21 complex	2	1	5	3	2	1	5	2165	8	327	B123-270819-01.fasta	TRUE	2019-08-27T00:00:00Z	Dudelange	B108-130819-01	0.667314	94	9		B123	0.995337	578911	9		aspA,glnA,gltA,glyA,pgm,tkt,uncA,porA,fn_gyrA	100	100	492.207	2	1	5	3	2	1	5	327	8	1	0	9	19	B123___2___1___5___3___2___1___5___327___8	9MLST match
B158-221019-01	B158	Bird	Corvus corone	C. jejuni	5846	?	76	105	72	104	124	96	31	2304	40	858	B158-221019-01.fasta	TRUE	2019-10-22T00:00:00Z	Dudelange	B158-221019-01	0.751463	307	9		21-B158	0.995543	1737437	9		aspA,glnA,gltA,glyA,pgm,tkt,uncA,porA,fn_gyrA	100	100	496.324	76	105	72	104	124	96	31	858	40	1	0	9	5846	B158___76___105___72___104___124___96___31___858___40	genome match
B167-230720-01	B167	Bird	Apus apus	C. jejuni	1044	ST-658	2	10	2	4	19	3	6	84	27	25	B167-230720-01.fasta	TRUE	2020-07-23T00:00:00Z	Dudelange	B167-230720-01	0.734733	45	9		21-B167	0.998938	346243	9		aspA,glnA,gltA,glyA,pgm,tkt,uncA,porA,fn_gyrA	100	100	492.041	2	10	2	4	19	3	6	25	27	1	0	9	1044	B167___2___10___2___4___19___3___6___25___27	genome match
B190-130820-01	B190	Bird	Turdus	C. jejuni	11	ST-45	48	7	10	4	1	7	1	414	7	217	B190-130820-01.fasta	TRUE	2020-08-13T00:00:00Z	Dudelange	B183-300720-01	0.054235	256	9		21-B190	0.995563	363793	9		aspA,glnA,gltA,glyA,pgm,tkt,uncA,porA,fn_gyrA	100	97.8089	454.891	48	7	10	4	1	7	1	217	7	3	0	9	11	B190___48___7___10___4___1___7___1___217___7	9MLST match
B193-200820-02	B193	Bird	Anas	C. jejuni	5207	NA	37	187	4	28	19	24	23	2614	51	2356	B193-200820-02.fasta	TRUE	2020-08-20T00:00:00Z	Wasserbillig	B193-200820-02	1	725	9		B193	0.999986	5037909	9		aspA,glnA,gltA,glyA,pgm,tkt,uncA,porA,fn_gyrA	100	100	487.171	37	187	4	28	19	24	23	2356	51	1	0	9	5207	B193___37___187___4___28___19___24___23___2356___51	genome match
B194-200820-01	B194	Bird	Alopochen aegyptiacus	C. jejuni	8614	ST-1332	2	1	4	28	58	672	58	2612	36	6	B194-200820-01.fasta	TRUE	2020-08-20T00:00:00Z	Wasserbillig	B189-130820-01	1	233	9		21-B194	1	4634237	9		aspA,glnA,gltA,glyA,pgm,tkt,uncA,porA,fn_gyrA	100	100	492.184	2	1	4	28	58	672	58	6	36	1	0	9	8614	B194___2___1___4___28___58___672___58___6___36	9MLST match
B203-270820-04	B203	Bird	Corvus corone	C. jejuni	677	ST-677 complex	10	81	50	99	120	76	52	36	19	276	B203-270820-04.fasta	TRUE	2020-08-27T00:00:00Z	Dudelange	B046-180619-01	0.023741	62	9		21-B203	0.999885	64309	9		aspA,glnA,gltA,glyA,pgm,tkt,uncA,porA,fn_gyrA	100	92.12	343.227	10	81	50	99	120	76	52	276	19	4	0	9	677	B203___10___81___50___99___120___76___52___276___19	9MLST match
B203-270820-01	B203	Bird	Corvus corone	C. jejuni	11385	?	4	43	9	5	8	46	21	3163	80	203	B203-270820-01.fasta	TRUE	2020-08-27T00:00:00Z	Dudelange	B203-270820-01	0.818471	164	9		21-B203	0.998848	4154178	9		aspA,glnA,gltA,glyA,pgm,tkt,uncA,porA,fn_gyrA	100	100	496.177	4	43	9	5	8	46	21	203	80	1	0	9	11385	B203___4___43___9___5___8___46___21___203___80	genome match
B203-270820-02	B203	Bird	Corvus corone	C. jejuni	11381	?	577	2	397	91	884	748	51	3164	109	2368	B203-270820-02.fasta	TRUE	2020-08-27T00:00:00Z	Dudelange	B203-270820-02	0.010582	726	9		21-B203	0.992671	61487	9		aspA,glnA,gltA,glyA,pgm,tkt,uncA,porA,fn_gyrA	100	98.0922	361.25	577	2	397	91	884	748	51	2368	109	7	1	8	11381	B203___577___2___397___91___884___748___51___2368___109	genome match
B221-240920-01	B221	Bird	Alopochen aegyptiacus	C. jejuni	1294	?	2	59	96	48	131	24	57	2460	13	152	B221-240920-01.fasta	TRUE	2020-09-24T00:00:00Z	Wasserbillig	B221-240920-01	0.99604	727	9		21-B221	0.999986	2224645	9		aspA,glnA,gltA,glyA,pgm,tkt,uncA,porA,fn_gyrA	100	100	492.158	2	59	96	48	131	24	57	152	13	1	0	9	1294	B221___2___59___96___48___131___24___57___152___13	genome match
B250-060321-01	B250	Bird	Emberiza citrinella	C. jejuni	11376	?	578	143	116	151	198	189	33	3165	108	2370	B250-060321-01.fasta	TRUE	2021-03-06T00:00:00Z	Uerbersyren	B250-060321-01	0.807134	728	9		B250	0.999986	88718	9		aspA,glnA,gltA,glyA,pgm,tkt,uncA,porA,fn_gyrA	100	100	494.735	578	143	116	151	198	189	33	2370	108	1	0	9	11376	B250___578___143___116___151___198___189___33___2370___108	genome match
B251-060321-01	B251	Bird	Emberiza citrinella	C. jejuni	11376	?	578	143	116	151	198	189	33	3165	108	2370	B251-060321-01.fasta	TRUE	2021-03-06T00:00:00Z	Uerbersyren	B250-060321-01	0.630928	728	9		B251	0.9993	34282	9		aspA,glnA,gltA,glyA,pgm,tkt,uncA,porA,fn_gyrA	100	100	489.998	578	143	116	151	198	189	33	2370	108	1	0	9	11376	B251___578___143___116___151___198___189___33___2370___108	9MLST match
B266-270321-01	B266	Bird	Sylvia atricapilla	C. jejuni	6313	?	323	439	384	483	611	512	371	3166	107	2369	B266-270321-01.fasta	TRUE	2021-03-27T00:00:00Z	Uerbersyren	B302-140421-01	0.941746	732	9		B266	0.999888	213147	9		aspA,glnA,gltA,glyA,pgm,tkt,uncA,porA,fn_gyrA	100	100	495.924	323	439	384	483	611	512	371	2369	107	1	0	9	6313	B266___323___439___384___483___611___512___371___2369___107	9MLST match
B284-140421-02	B284	Bird	Sylvia atricapilla	C. jejuni	11413	?	95	795	671	892	1137	872	717	3257	22	2371	B284-140421-02.fasta	TRUE	2021-04-14T00:00:00Z	Uerbersyren	B284-140421-02	0.983177	729	8	fn_gyrA	B284	1	4365791	9		aspA,glnA,gltA,glyA,pgm,tkt,uncA,porA,fn_gyrA	100	100	491.709	95	795	671	892	1137	872	717	2371	110	1	0	9	11413	B284___95___795___671___892___1137___872___717___2371___110	genome match
B285-140421-02	B285	Bird	Sylvia atricapilla	C. jejuni	1316	?	95	2	94	127	181	144	110	3167	74	463	B285-140421-02.fasta	TRUE	2021-04-14T00:00:00Z	Uerbersyren	B285-140421-02	1	730	9		B285	0.999986	6216924	9		aspA,glnA,gltA,glyA,pgm,tkt,uncA,porA,fn_gyrA	100	100	492.219	95	2	94	127	181	144	110	463	74	1	0	9	1316	B285___95___2___94___127___181___144___110___463___74	genome match
B288-140421-02	B288	Bird	Sylvia atricapilla	C. jejuni	6313	?	323	439	384	483	611	512	371	3168	107	2369	B288-140421-02.fasta	TRUE	2021-04-14T00:00:00Z	Uerbersyren	B302-140421-01	0.999327	732	9		B288	0.999842	3597499	9		aspA,glnA,gltA,glyA,pgm,tkt,uncA,porA,fn_gyrA	100	100	496.135	323	439	384	483	611	512	371	2369	107	1	0	9	6313	B288___323___439___384___483___611___512___371___2369___107	9MLST match
B299-140421-01	B299	Bird	Sylvia atricapilla	C. jejuni	6313	?	323	439	384	483	611	512	371	3168	107	2369	B299-140421-01.fasta	TRUE	2021-04-14T00:00:00Z	Uerbersyren	B302-140421-01	1	732	9		B299	0.999842	5459398	9		aspA,glnA,gltA,glyA,pgm,tkt,uncA,porA,fn_gyrA	100	100	496.24	323	439	384	483	611	512	371	2369	107	1	0	9	6313	B299___323___439___384___483___611___512___371___2369___107	9MLST match
B300-140421-01	B300	Bird	Sylvia atricapilla	C. jejuni	1080	?	10	2	107	137	120	76	1	3169	74	130	B300-140421-01.fasta	TRUE	2021-04-14T00:00:00Z	Uerbersyren	B300-140421-01	1	731	9		B300	0.999971	4805983	9		aspA,glnA,gltA,glyA,pgm,tkt,uncA,porA,fn_gyrA	100	100	491.961	10	2	107	137	120	76	1	130	74	1	0	9	1080	B300___10___2___107___137___120___76___1___130___74	genome match
B302-140421-01	B302	Bird	Sylvia atricapilla	C. jejuni	6313	?	323	439	384	483	611	512	371	3168	107	2369	B302-140421-01.fasta	TRUE	2021-04-14T00:00:00Z	Uerbersyren	B302-140421-01	1	732	9		B302	0.999942	3787100	9		aspA,glnA,gltA,glyA,pgm,tkt,uncA,porA,fn_gyrA	100	100	496.271	323	439	384	483	611	512	371	2369	107	1	0	9	6313	B302___323___439___384___483___611___512___371___2369___107	genome match
B303-140421-01	B303	Bird	Emberiza citrinella	C. jejuni	11376	?	578	143	116	151	198	189	33	3165	108	2370	B303-140421-01.fasta	TRUE	2021-04-14T00:00:00Z	Uerbersyren	B250-060321-01	0.823403	728	9		B303	0.999952	26947	8	glnA	aspA,gltA,glyA,pgm,tkt,uncA,porA,fn_gyrA	100	100	498.736	578	143	116	151	198	189	33	2370	108	1	0	8	11376	B303___578___143___116___151___198___189___33___2370___108	9MLST match
B308-140421-01	B308	Bird	Emberiza citrinella	C. jejuni	11376	?	578	143	116	151	198	189	33	3165	108	2370	B308-140421-01.fasta	TRUE	2021-04-14T00:00:00Z	Uerbersyren	B250-060321-01	1	728	9		B308	1	1324437	9		aspA,glnA,gltA,glyA,pgm,tkt,uncA,porA,fn_gyrA	100	100	496.133	578	143	116	151	198	189	33	2370	108	1	0	9	11376	B308___578___143___116___151___198___189___33___2370___108	9MLST match
B318-050521-01	B318	Bird	Asio otus	C. jejuni	45	ST-45 complex	4	7	10	4	1	7	1	2042	7	49	B318-050521-01.fasta	TRUE	2021-05-05T00:00:00Z	Dudelange	B037-110619-01	0.907399	58	9		B318	0.998689	3942328	9		aspA,glnA,gltA,glyA,pgm,tkt,uncA,porA,fn_gyrA	100	100	492.362	4	7	10	4	1	7	1	49	7	1	0	9	45	B318___4___7___10___4___1___7___1___49___7	9MLST match
B320-050521-02	B320	Bird	Pica pica	C. jejuni	4570	?	64	22	20	100	242	204	16	3170	37	1795	B320-050521-02.fasta	TRUE	2021-05-05T00:00:00Z	Dudelange	B320-050521-02	1	733	9		B320	0.999986	2271464	9		aspA,glnA,gltA,glyA,pgm,tkt,uncA,porA,fn_gyrA	100	100	494.002	64	22	20	100	242	204	16	1795	37	1	0	9	4570	B320___64___22___20___100___242___204___16___1795___37	genome match
B321-050521-01	B321	Bird	Pica pica	C. jejuni	11383	?	64	33	78	18	1136	86	16	3171	11	1598	B321-050521-01.fasta	TRUE	2021-05-05T00:00:00Z	Dudelange	B321-050521-01	0.906572	734	9		B321	0.999972	124503	9		aspA,glnA,gltA,glyA,pgm,tkt,uncA,porA,fn_gyrA	100	100	495.783	64	33	78	18	1136	86	16	1598	11	1	0	9	11383	B321___64___33___78___18___1136___86___16___1598___11	genome match
B325-250521-01	B325	Bird	Corvus monedula	C. jejuni	563	ST-177 complex	17	5	8	5	8	2	4	3172	31	909	B325-250521-01.fasta	TRUE	2021-05-25T00:00:00Z	Dudelange	B325-250521-01	0.392866	211	9		B325	0.995996	2409690	9		aspA,glnA,gltA,glyA,pgm,tkt,uncA,porA,fn_gyrA	100	100	491.87	17	5	8	5	8	2	4	909	31	1	0	9	563	B325___17___5___8___5___8___2___4___909___31	genome match
B326-250521-01	B326	Bird	Corvus monedula	C. jejuni	4570	?	64	22	20	100	242	204	16	3170	37	1795	B326-250521-01.fasta	TRUE	2021-05-25T00:00:00Z	Dudelange	B320-050521-02	0.355691	733	9		B326	0.999986	1073006	9		aspA,glnA,gltA,glyA,pgm,tkt,uncA,porA,fn_gyrA	100	100	489.591	64	22	20	100	242	204	16	1795	37	2	2	7	4570	B326___64___22___20___100___242___204___16___1795___37	9MLST match
B327-250521-01	B327	Bird	Corvus corone	C. jejuni	11382	?	80	70	164	98	123	229	16	3173	31	1468	B327-250521-01.fasta	TRUE	2021-05-25T00:00:00Z	Dudelange	B327-250521-01	1	735	9		B327	0.999986	3235964	9		aspA,glnA,gltA,glyA,pgm,tkt,uncA,porA,fn_gyrA	100	100	496.491	80	70	164	98	123	229	16	1468	31	1	0	9	11382	B327___80___70___164___98___123___229___16___1468___31	genome match
B328-250521-02	B328	Bird	Corvus corone	C. jejuni	6386	?	64	95	20	100	514	301	60	3174	36	406	B328-250521-02.fasta	TRUE	2021-05-25T00:00:00Z	Dudelange	B328-250521-02	0.953292	736	9		B328	0.999971	603959	9		aspA,glnA,gltA,glyA,pgm,tkt,uncA,porA,fn_gyrA	100	100	489.735	64	95	20	100	514	301	60	406	36	1	0	9	6386	B328___64___95___20___100___514___301___60___406___36	genome match
B329-250521-01	B329	Bird	Turdus	C. jejuni	677	ST-677 complex	10	81	50	99	120	76	52	36	19	276	B329-250521-01.fasta	TRUE	2021-05-25T00:00:00Z	Dudelange	B046-180619-01	0.95159	62	9		B329	0.999942	8307703	9		aspA,glnA,gltA,glyA,pgm,tkt,uncA,porA,fn_gyrA	100	100	492.175	10	81	50	99	120	76	52	276	19	1	0	9	677	B329___10___81___50___99___120___76___52___276___19	9MLST match
B330-250521-01	B330	Bird	Sturnus	C. jejuni	677	ST-677 complex	10	81	50	99	120	76	52	2070	19	276	B330-250521-01.fasta	TRUE	2021-05-25T00:00:00Z	Dudelange	B046-180619-01	0.9991	62	9		B330	0.999784	8877424	9		aspA,glnA,gltA,glyA,pgm,tkt,uncA,porA,fn_gyrA	100	100	492.276	10	81	50	99	120	76	52	276	19	1	0	9	677	B330___10___81___50___99___120___76___52___276___19	9MLST match
B331-250521-01	B331	Bird	Parus major	C. jejuni	45	ST-45 complex	4	7	10	4	1	7	1	297	7	49	B331-250521-01.fasta	TRUE	2021-05-25T00:00:00Z	Dudelange	B037-110619-01	0.154478	58	9		B331	0.998517	740002	9		aspA,glnA,gltA,glyA,pgm,tkt,uncA,porA,fn_gyrA	100	99.1922	477.171	4	7	10	4	1	7	1	49	7	2	0	9	45	B331___4___7___10___4___1___7___1___49___7	9MLST match
B333-250521-01	B333	Bird	Turdus	C. jejuni	11377	?	98	122	98	891	180	150	113	3175	101	970	B333-250521-01.fasta	TRUE	2021-05-25T00:00:00Z	Dudelange	B333-250521-01	0.999549	737	9		B333	0.999986	2363119	9		aspA,glnA,gltA,glyA,pgm,tkt,uncA,porA,fn_gyrA	100	100	496.174	98	122	98	891	180	150	113	970	101	1	0	9	11377	B333___98___122___98___891___180___150___113___970___101	genome match
B335-070621-01	B335	Bird	Corvus monedula	C. jejuni	11584	?	64	22	20	189	134	94	16	3258	11	2372	B335-070621-01.fasta	TRUE	2021-06-07T00:00:00Z	Dudelange	B335-070621-01	0.415015	738	9		B335	0.999986	899827	9		aspA,glnA,gltA,glyA,pgm,tkt,uncA,porA,fn_gyrA	100	100	488.867	64	22	20	189	134	94	16	2372	11	1	0	9	11584	B335___64___22___20___189___134___94___16___2372___11	genome match
B336-070621-02	B336	Bird	Corvus monedula	C. jejuni	1481	?	35	5	9	5	8	2	2	3177	31	1836	B336-070621-02.fasta	TRUE	2021-06-07T00:00:00Z	Dudelange	B336-070621-02	0.306362	739	9		B336	1	859779	9		aspA,glnA,gltA,glyA,pgm,tkt,uncA,porA,fn_gyrA	100	100	485.304	35	5	9	5	8	2	2	1836	31	2	0	9	1481	B336___35___5___9___5___8___2___2___1836___31	genome match
B336-070621-01	B336	Bird	Corvus monedula	C. jejuni	11379	?	64	226	203	189	652	54	16	3176	11	2367	B336-070621-01.fasta	TRUE	2021-06-07T00:00:00Z	Dudelange	B338-070621-02	0.45699	740	9		B336	0.999526	1943365	9		aspA,glnA,gltA,glyA,pgm,tkt,uncA,porA,fn_gyrA	100	100	491.343	64	226	203	189	652	54	16	2367	11	1	0	9	11379	B336___64___226___203___189___652___54___16___2367___11	9MLST match
B337-070621-01	B337	Bird	Pica pica	C. jejuni	1044	ST-658 complex	2	10	2	4	19	3	6	84	27	25	B337-070621-01.fasta	TRUE	2021-06-07T00:00:00Z	Dudelange	B167-230720-01	0.585712	45	9		B337	0.999799	1676056	9		aspA,glnA,gltA,glyA,pgm,tkt,uncA,porA,fn_gyrA	100	100	491.033	2	10	2	4	19	3	6	25	27	1	0	9	1044	B337___2___10___2___4___19___3___6___25___27	9MLST match
B338-070621-02	B338	Bird	Corvus monedula	C. jejuni	11379	?	64	226	203	189	652	54	16	3178	11	2367	B338-070621-02.fasta	TRUE	2021-06-07T00:00:00Z	Dudelange	B338-070621-02	0.710597	740	9		B338	0.999971	2992383	9		aspA,glnA,gltA,glyA,pgm,tkt,uncA,porA,fn_gyrA	100	100	491.998	64	226	203	189	652	54	16	2367	11	1	0	9	11379	B338___64___226___203___189___652___54___16___2367___11	genome match
B339-070621-01	B339	Bird	Corvus corone	C. jejuni	267	ST-283 complex	4	7	40	4	42	51	1	1407	1	73	B339-070621-01.fasta	TRUE	2021-06-07T00:00:00Z	Dudelange	B339-070621-01	0.99321	21	9		B339	0.999842	3232186	9		aspA,glnA,gltA,glyA,pgm,tkt,uncA,porA,fn_gyrA	100	100	489.226	4	7	40	4	42	51	1	73	1	1	0	9	267	B339___4___7___40___4___42___51___1___73___1	genome match
B342-070621-01	B342	Bird	Dendocopos	C. jejuni	19	ST-21 complex	2	1	5	3	2	1	5	82	8	7	B342-070621-01.fasta	TRUE	2021-06-07T00:00:00Z	Dudelange	5895	0.121649	3	8	fn_gyrA	B342	1	130591	9		aspA,glnA,gltA,glyA,pgm,tkt,uncA,porA,fn_gyrA	100	91.5956	380.335	2	1	5	3	2	1	5	7	1	2	0	9	19	B342___2___1___5___3___2___1___5___7___1	partial match
B345-080621-01	B345	Bird	Prunella modularis	C. jejuni	383	ST-283 complex	4	7	12	4	42	51	1	251	1	73	B345-080621-01.fasta	TRUE	2021-06-07T00:00:00Z	Uerbersyren	B067-020719-01	0.559347	21	9		B345	0.999094	3153635	9		aspA,glnA,gltA,glyA,pgm,tkt,uncA,porA,fn_gyrA	100	100	488.814	4	7	12	4	42	51	1	73	1	1	0	9	383	B345___4___7___12___4___42___51___1___73___1	9MLST match
B353-210621-01	B353	Bird	Corvus monedula	C. jejuni	448	?	61	70	22	18	2	74	47	2506	31	639	B353-210621-01.fasta	TRUE	2021-06-21T00:00:00Z	Dudelange	B353-210621-01	0.663196	351	9		B353	0.992634	1314283	9		aspA,glnA,gltA,glyA,pgm,tkt,uncA,porA,fn_gyrA	100	100	496.486	61	70	22	18	2	74	47	639	31	1	0	9	448	B353___61___70___22___18___2___74___47___639___31	genome match
B354-210621-01	B354	Bird	Garrulus	C. jejuni	2162	?	35	43	8	51	8	2	21	3179	7	634	B354-210621-01.fasta	TRUE	2021-06-21T00:00:00Z	Dudelange	B354-210621-01	0.832684	216	9		B354	0.998212	1106140	9		aspA,glnA,gltA,glyA,pgm,tkt,uncA,porA,fn_gyrA	100	100	492.184	35	43	8	51	8	2	21	634	7	1	0	9	2162	B354___35___43___8___51___8___2___21___634___7	genome match
B355-210621-01	B355	Bird	Fringilla	C. jejuni	267	ST-283 complex	4	7	40	4	42	51	1	2744	1	73	B355-210621-01.fasta	TRUE	2021-06-21T00:00:00Z	Dudelange	B339-070621-01	0.896776	21	9		B355	0.999611	4929073	9		aspA,glnA,gltA,glyA,pgm,tkt,uncA,porA,fn_gyrA	100	100	489.28	4	7	40	4	42	51	1	73	1	1	0	9	267	B355___4___7___40___4___42___51___1___73___1	9MLST match
B357-210621-01	B357	Bird	Corvus monedula	C. jejuni	11378	?	35	5	8	51	8	2	21	3180	7	1621	B357-210621-01.fasta	TRUE	2021-06-21T00:00:00Z	Dudelange	B357-210621-01	0.798885	216	9		B357	0.99783	233548	9		aspA,glnA,gltA,glyA,pgm,tkt,uncA,porA,fn_gyrA	100	100	491.806	35	5	8	51	8	2	21	1621	7	1	0	9	11378	B357___35___5___8___51___8___2___21___1621___7	genome match
B358-210621-01	B358	Bird	Turdus	C. jejuni	11	ST-45 complex	48	7	10	4	1	7	1	3181	7	217	B358-210621-01.fasta	TRUE	2021-06-21T00:00:00Z	Dudelange	B072-020719-02	0.647432	36	7	aspA,porA	B358	0.999971	4250671	9		aspA,glnA,gltA,glyA,pgm,tkt,uncA,porA,fn_gyrA	100	100	491.99	4	7	10	4	1	7	1	44	7	1	0	9	45	B358___4___7___10___4___1___7___1___44___7	partial match
B361-210621-01	B361	Bird	Turdus	C. jejuni	230	ST-45 complex	4	7	41	4	42	7	1	2282	1	217	B361-210621-01.fasta	TRUE	2021-06-21T00:00:00Z	Dudelange	B361-210621-01	0.539187	21	9		B361	0.999928	4704782	9		aspA,glnA,gltA,glyA,pgm,tkt,uncA,porA,fn_gyrA	100	100	492.275	4	7	41	4	42	7	1	217	1	1	0	9	230	B361___4___7___41___4___42___7___1___217___1	genome match
B362-210621-01	B362	Bird	Turdus	C. jejuni	267	ST-283 complex	4	7	40	4	42	51	1	2744	1	73	B362-210621-01.fasta	TRUE	2021-06-21T00:00:00Z	Dudelange	B339-070621-01	0.799407	21	9		B362	0.999928	2911212	9		aspA,glnA,gltA,glyA,pgm,tkt,uncA,porA,fn_gyrA	100	100	489.138	4	7	40	4	42	51	1	73	1	1	0	9	267	B362___4___7___40___4___42___51___1___73___1	9MLST match
B364-210621-01	B364	Bird	Pica pica	C. jejuni	11380	?	18	33	72	98	116	871	6	3182	11	200	B364-210621-01.fasta	TRUE	2021-06-21T00:00:00Z	Dudelange	B364-210621-01	0.991815	741	9		B364	0.999971	778619	9		aspA,glnA,gltA,glyA,pgm,tkt,uncA,porA,fn_gyrA	100	100	493.74	18	33	72	98	116	871	6	200	11	1	0	9	11380	B364___18___33___72___98___116___871___6___200___11	genome match
W021-240919-01	W021	Surface water	Moselle	C. jejuni	704	?	2	29	4	27	10	25	57	2604	13	886	W021-240919-01.fasta	TRUE	2019-09-12T00:00:00Z	Moselle (Wasserbillig)	W021-240919-01	0.93011	234	9		21-W021	0.999972	102585	9		aspA,glnA,gltA,glyA,pgm,tkt,uncA,porA,fn_gyrA	100	100	489.188	2	29	4	27	10	25	57	886	13	1	0	9	704	W021___2___29___4___27___10___25___57___886___13	genome match
W052-240920-02	W052	Surface water	Sûre	C. jejuni	991	ST-692 complex	37	52	57	26	107	29	23	2620	4	6	W052-240920-02.fasta	TRUE	2020-09-24T00:00:00Z	Sûre (Wasserbillig)	47860	0.215624	105	8	tkt	W052	0.999828	752222	7	glnA,gltA	aspA,glyA,pgm,tkt,uncA,porA,fn_gyrA	100	100	494.901	37	52	57	26	107	25	23	6	4	1	0	7	8235	W052___37___52___57___26___107___25___23___6___4	partial match
W087-210621-01	W087	Surface water	Alzette	C. jejuni	10102	?	64	22	203	100	134	160	60	3184	11	2366	W087-210621-01.fasta	TRUE	2021-06-21T00:00:00Z	Alzette Hesperange Amont step	W087-210621-01	0.02826	299	9		W087	0.999467	97378	9		aspA,glnA,gltA,glyA,pgm,tkt,uncA,porA,fn_gyrA	100	90.4711	391.492	64	22	203	100	134	160	60	2366	11	3	3	6	10102	W087___64___22___203___100___134___160___60___2366___11	genome match
B025-070519-02	B025	Bird	Corvus corone	C. jejuni	677	ST-677 complex	10	81	50	99	120	76	52	942	19	276	B025-070519-02.fasta	TRUE	2019-05-07T00:00:00Z	Dudelange	NA	NA	NA	NA	NA	NA	NA	NA	NA	NA	NA	NA	NA	NA	NA	NA	NA	NA	NA	NA	NA	NA	NA	NA	NA	NA	NA	NA	false negative
B027-070519-01	B027	Bird	Pica pica	C. jejuni	45	ST-45 complex	4	7	10	4	1	7	1	2155	7	49	B027-070519-01.fasta	TRUE	2019-05-07T00:00:00Z	Dudelange	NA	NA	NA	NA	NA	NA	NA	NA	NA	NA	NA	NA	NA	NA	NA	NA	NA	NA	NA	NA	NA	NA	NA	NA	NA	NA	NA	NA	false negative
B189-130820-01	B189	Bird	Turdus	C. jejuni	8614	ST-1332	2	1	4	28	58	672	58	2612	36	6	B189-130820-01.fasta	TRUE	2020-08-13T00:00:00Z	Dudelange	NA	NA	NA	NA	NA	NA	NA	NA	NA	NA	NA	NA	NA	NA	NA	NA	NA	NA	NA	NA	NA	NA	NA	NA	NA	NA	NA	NA	false negative
B198-200820-01	B198	Bird	Alopochen aegyptiacus	C. jejuni	11	ST-45	48	7	10	4	1	7	1	414	7	217	B198-200820-01.fasta	TRUE	2020-08-20T00:00:00Z	Wasserbillig	NA	NA	NA	NA	NA	NA	NA	NA	NA	NA	NA	NA	NA	NA	NA	NA	NA	NA	NA	NA	NA	NA	NA	NA	NA	NA	NA	NA	false negative
W025-02122019-02	W025	Surface water	Alzette	C. jejuni	11466	?	18	33	649	325	116	104	6	2278	100	2349	W025-02122019-02.fasta	TRUE	2019-12-02T00:00:00Z	Alzette Hesperange Amont step	NA	NA	NA	NA	NA	NA	NA	NA	NA	NA	NA	NA	NA	NA	NA	NA	NA	NA	NA	NA	NA	NA	NA	NA	NA	NA	NA	NA	false negative
NA	B025	NA	NA	NA	NA	NA	NA	NA	NA	NA	NA	NA	NA	NA	NA	NA	NA	NA	NA	NA	51821	0.530307	107	NA	NA	B25	0.994974	636367	8	uncA	aspA,glnA,gltA,glyA,pgm,tkt,porA,fn_gyrA	100	100	493.871	4	7	10	4	1	7	530	49	7	1	0	8	8205	B025___4___7___10___4___1___7___530___49___7	additional strain
NA	B027	NA	NA	NA	NA	NA	NA	NA	NA	NA	NA	NA	NA	NA	NA	NA	NA	NA	NA	NA	B046-180619-01	0.842761	62	NA	NA	21-B027	0.999914	4842611	9		aspA,glnA,gltA,glyA,pgm,tkt,uncA,porA,fn_gyrA	100	100	491.975	10	81	50	99	120	76	52	276	19	1	0	9	677	B027___10___81___50___99___120___76___52___276___19	additional strain
NA	B027	NA	NA	NA	NA	NA	NA	NA	NA	NA	NA	NA	NA	NA	NA	NA	NA	NA	NA	NA	B096-300719-02	0.15595	718	NA	NA	21-B027	0.999942	642920	8	aspA	glnA,gltA,glyA,pgm,tkt,uncA,porA,fn_gyrA	100	100	484.21	18	100	82	24	138	116	63	2358	31	2	0	8	951	B027___18___100___82___24___138___116___63___2358___31	additional strain
NA	B028	NA	NA	NA	NA	NA	NA	NA	NA	NA	NA	NA	NA	NA	NA	NA	NA	NA	NA	NA	B096-300719-02	0.719521	718	NA	NA	B028	0.999971	6521825	9		aspA,glnA,gltA,glyA,pgm,tkt,uncA,porA,fn_gyrA	100	100	494.346	18	100	82	24	138	116	63	2358	31	1	0	9	951	B028___18___100___82___24___138___116___63___2358___31	additional strain
NA	B029	NA	NA	NA	NA	NA	NA	NA	NA	NA	NA	NA	NA	NA	NA	NA	NA	NA	NA	NA	B051-180619-02	0.010677	716	NA	NA	21-B029	0.994196	15790	6	aspA,glnA,uncA	gltA,glyA,pgm,tkt,porA,fn_gyrA	100	86.725	273.411	18	81	68	143	134	153	16	479	11	2	0	6	10815	B029___18___81___68___143___134___153___16___479___11	additional strain
NA	B035	NA	NA	NA	NA	NA	NA	NA	NA	NA	NA	NA	NA	NA	NA	NA	NA	NA	NA	NA	33960	0.434147	490	NA	NA	21-B035	0.999727	947400	9		aspA,glnA,gltA,glyA,pgm,tkt,uncA,porA,fn_gyrA	100	100	490.447	64	22	85	98	652	270	60	4439	380	1	0	9	7831	B035___64___22___85___98___652___270___60___4439___380	additional strain
NA	B035	NA	NA	NA	NA	NA	NA	NA	NA	NA	NA	NA	NA	NA	NA	NA	NA	NA	NA	NA	78916	0.115583	691	NA	NA	21-B035	0.999885	550647	9		aspA,glnA,gltA,glyA,pgm,tkt,uncA,porA,fn_gyrA	100	97.0667	472.602	64	95	20	100	514	101	60	1157	11	2	2	7	6427	B035___64___95___20___100___514___101___60___1157___11	additional strain
NA	B035	NA	NA	NA	NA	NA	NA	NA	NA	NA	NA	NA	NA	NA	NA	NA	NA	NA	NA	NA	W087-210621-01	0.03142	299	NA	NA	21-B035	0.995951	857538	7	gltA,porA	aspA,glnA,glyA,pgm,tkt,uncA,fn_gyrA	100	100	482.023	64	22	203	100	134	160	60	2366	11	3	5	2	10102	B035___64___22___203___100___134___160___60___2366___11	additional strain
NA	B035	NA	NA	NA	NA	NA	NA	NA	NA	NA	NA	NA	NA	NA	NA	NA	NA	NA	NA	NA	B335-070621-01	0.029535	738	NA	NA	21-B035	0.996698	815265	7	tkt,porA	aspA,glnA,gltA,glyA,pgm,uncA,fn_gyrA	100	93.04	412.247	64	22	20	189	134	94	16	2372	11	4	5	2	11584	B035___64___22___20___189___134___94___16___2372___11	additional strain
NA	B035	NA	NA	NA	NA	NA	NA	NA	NA	NA	NA	NA	NA	NA	NA	NA	NA	NA	NA	NA	33954	0.017011	488	NA	NA	21-B035	0.994774	21056	5	glnA,gltA,pgm,tkt	aspA,glyA,uncA,porA,fn_gyrA	100	99.07	422.481	258	174	474	193	753	595	131	4437	298	13	0	5	7825	B035___258___174___474___193___753___595___131___4437___298	additional strain
NA	B036	NA	NA	NA	NA	NA	NA	NA	NA	NA	NA	NA	NA	NA	NA	NA	NA	NA	NA	NA	B338-070621-02	0.067379	740	NA	NA	B036	0.998374	1223429	7	pgm,porA	aspA,glnA,gltA,glyA,tkt,uncA,fn_gyrA	100	93.83	398.311	64	226	203	189	652	54	16	2367	11	4	3	4	11379	B036___64___226___203___189___652___54___16___2367___11	additional strain
NA	B036	NA	NA	NA	NA	NA	NA	NA	NA	NA	NA	NA	NA	NA	NA	NA	NA	NA	NA	NA	B113-130819-02	0.060783	353	NA	NA	B036	0.999338	295978	9		aspA,glnA,gltA,glyA,pgm,tkt,uncA,porA,fn_gyrA	100	99.5089	455.086	258	174	207	193	336	314	229	2347	99	5	0	9	7836	B036___258___174___207___193___336___314___229___2347___99	additional strain
NA	B037	NA	NA	NA	NA	NA	NA	NA	NA	NA	NA	NA	NA	NA	NA	NA	NA	NA	NA	NA	78916	0.168466	691	NA	NA	B037	0.998675	640141	9		aspA,glnA,gltA,glyA,pgm,tkt,uncA,porA,fn_gyrA	100	99.8067	472.456	64	95	20	100	514	101	60	1157	11	1	0	9	6427	B037___64___95___20___100___514___101___60___1157___11	additional strain
NA	B037	NA	NA	NA	NA	NA	NA	NA	NA	NA	NA	NA	NA	NA	NA	NA	NA	NA	NA	NA	B338-070621-02	0.053956	740	NA	NA	B037	0.999611	994498	9		aspA,glnA,gltA,glyA,pgm,tkt,uncA,porA,fn_gyrA	100	100	448.793	64	226	203	189	652	54	16	2367	11	3	2	7	11379	B037___64___226___203___189___652___54___16___2367___11	additional strain
NA	B037	NA	NA	NA	NA	NA	NA	NA	NA	NA	NA	NA	NA	NA	NA	NA	NA	NA	NA	NA	107389	0.0393	364	NA	NA	B037	0.99578	427819	5	gltA,pgm,tkt,porA	aspA,glnA,glyA,uncA,fn_gyrA	99.928	89.456	376.027	64	22	460	351	752	187	60	2531	11	4	3	2	7817	B037___64___22___460___351___752___187___60___2531___11	additional strain
NA	B037	NA	NA	NA	NA	NA	NA	NA	NA	NA	NA	NA	NA	NA	NA	NA	NA	NA	NA	NA	33939	0.030689	299	NA	NA	B037	0.996227	648831	7	glyA,porA	aspA,glnA,gltA,pgm,tkt,uncA,fn_gyrA	100	94.7286	404.195	64	133	203	142	134	160	60	2366	11	6	5	2	7811	B037___64___133___203___142___134___160___60___2366___11	additional strain
NA	B038	NA	NA	NA	NA	NA	NA	NA	NA	NA	NA	NA	NA	NA	NA	NA	NA	NA	NA	NA	B051-180619-02	0.197144	716	NA	NA	21-B038	0.999813	650662	8	aspA	glnA,gltA,glyA,pgm,tkt,uncA,porA,fn_gyrA	100	98.2288	477.192	18	81	68	143	134	153	16	479	11	2	1	7	10815	B038___18___81___68___143___134___153___16___479___11	additional strain
NA	B039	NA	NA	NA	NA	NA	NA	NA	NA	NA	NA	NA	NA	NA	NA	NA	NA	NA	NA	NA	33952	0.034452	487	NA	NA	21-B039	0.994572	2837170	7	tkt,porA	aspA,glnA,gltA,glyA,pgm,uncA,fn_gyrA	100	93.6286	400.455	64	22	203	100	134	258	16	579	11	3	5	2	7823	B039___64___22___203___100___134___258___16___579___11	additional strain
NA	B039	NA	NA	NA	NA	NA	NA	NA	NA	NA	NA	NA	NA	NA	NA	NA	NA	NA	NA	NA	33933	0.032098	483	NA	NA	21-B039	0.994025	2258104	7	gltA,porA	aspA,glnA,glyA,pgm,tkt,uncA,fn_gyrA	100	89.8786	363.572	64	22	85	98	134	101	16	2367	11	4	5	2	7805	B039___64___22___85___98___134___101___16___2367___11	additional strain
NA	B039	NA	NA	NA	NA	NA	NA	NA	NA	NA	NA	NA	NA	NA	NA	NA	NA	NA	NA	NA	34076	0.022728	499	NA	NA	21-B039	0.994054	1180578	6	glyA,tkt,fn_gyrA	aspA,glnA,gltA,pgm,uncA,porA	100	99.4067	409.579	64	22	71	189	134	118	60	1603	103	6	3	3	7850	B039___64___22___71___189___134___118___60___1603___103	additional strain
NA	B039	NA	NA	NA	NA	NA	NA	NA	NA	NA	NA	NA	NA	NA	NA	NA	NA	NA	NA	NA	B038-110619-03	0.01593	713	NA	NA	21-B039	0.993146	90335	4	gltA,pgm,tkt,porA,fn_gyrA	aspA,glnA,glyA,uncA	100	100	434.253	258	174	154	193	336	421	131	2354	103	10	0	4	10817	B039___258___174___154___193___336___421___131___2354___103	additional strain
NA	B050	NA	NA	NA	NA	NA	NA	NA	NA	NA	NA	NA	NA	NA	NA	NA	NA	NA	NA	NA	B113-130819-02	0.039711	353	NA	NA	B050	0.996138	319416	9		aspA,glnA,gltA,glyA,pgm,tkt,uncA,porA,fn_gyrA	100	100	445.257	258	174	207	193	336	314	229	2347	99	3	0	9	7836	B050___258___174___207___193___336___314___229___2347___99	additional strain
NA	B051	NA	NA	NA	NA	NA	NA	NA	NA	NA	NA	NA	NA	NA	NA	NA	NA	NA	NA	NA	16380	0.2633	402	NA	NA	21-B051	0.999239	399563	8	porA	aspA,glnA,gltA,glyA,pgm,tkt,uncA,fn_gyrA	100	97.5362	464.049	64	105	20	287	94	103	16	1096	11	2	2	6	2401	B051___64___105___20___287___94___103___16___1096___11	additional strain
NA	B051	NA	NA	NA	NA	NA	NA	NA	NA	NA	NA	NA	NA	NA	NA	NA	NA	NA	NA	NA	B121-270819-02	0.038601	724	NA	NA	21-B051	0.996354	466481	9		aspA,glnA,gltA,glyA,pgm,tkt,uncA,porA,fn_gyrA	100	99.3356	490.219	64	105	20	77	94	103	16	1634	11	4	7	2	6591	B051___64___105___20___77___94___103___16___1634___11	additional strain
NA	B052	NA	NA	NA	NA	NA	NA	NA	NA	NA	NA	NA	NA	NA	NA	NA	NA	NA	NA	NA	B338-070621-02	0.413292	740	NA	NA	21-B052	0.999611	2200803	9		aspA,glnA,gltA,glyA,pgm,tkt,uncA,porA,fn_gyrA	100	100	490.234	64	226	203	189	652	54	16	2367	11	1	0	9	11379	B052___64___226___203___189___652___54___16___2367___11	additional strain
NA	B052	NA	NA	NA	NA	NA	NA	NA	NA	NA	NA	NA	NA	NA	NA	NA	NA	NA	NA	NA	78916	0.064827	691	NA	NA	21-B052	0.998834	1038261	9		aspA,glnA,gltA,glyA,pgm,tkt,uncA,porA,fn_gyrA	100	97.3967	454.316	64	95	20	100	514	101	60	1157	11	3	3	6	6427	B052___64___95___20___100___514___101___60___1157___11	additional strain
NA	B052	NA	NA	NA	NA	NA	NA	NA	NA	NA	NA	NA	NA	NA	NA	NA	NA	NA	NA	NA	B038-110619-01	0.020523	352	NA	NA	21-B052	0.998417	1490281	9		aspA,glnA,gltA,glyA,pgm,tkt,uncA,porA,fn_gyrA	100	98.2789	424.243	64	22	20	100	134	301	16	391	104	6	6	3	10818	B052___64___22___20___100___134___301___16___391___104	additional strain
NA	B054	NA	NA	NA	NA	NA	NA	NA	NA	NA	NA	NA	NA	NA	NA	NA	NA	NA	NA	NA	B112-130819-01	0.893644	719	NA	NA	B054	0.999957	5892726	9		aspA,glnA,gltA,glyA,pgm,tkt,uncA,porA,fn_gyrA	100	100	493.643	64	583	22	111	122	303	16	2357	36	1	0	9	7882	B054___64___583___22___111___122___303___16___2357___36	additional strain
NA	B063	NA	NA	NA	NA	NA	NA	NA	NA	NA	NA	NA	NA	NA	NA	NA	NA	NA	NA	NA	B072-020719-02	0.381428	36	NA	NA	21-B063	0.999784	4543931	9		aspA,glnA,gltA,glyA,pgm,tkt,uncA,porA,fn_gyrA	100	100	491.308	4	7	10	4	1	7	1	44	7	1	0	9	45	B063___4___7___10___4___1___7___1___44___7	additional strain
NA	B063	NA	NA	NA	NA	NA	NA	NA	NA	NA	NA	NA	NA	NA	NA	NA	NA	NA	NA	NA	47721	0.250081	21	NA	NA	21-B063	0.999741	2649941	8	gltA	aspA,glnA,glyA,pgm,tkt,uncA,porA,fn_gyrA	100	99.6075	486.904	4	22	40	4	42	51	1	73	1	2	3	5	8202	B063___4___22___40___4___42___51___1___73___1	additional strain
NA	B067	NA	NA	NA	NA	NA	NA	NA	NA	NA	NA	NA	NA	NA	NA	NA	NA	NA	NA	NA	B300-140421-01	0.754062	731	NA	NA	21-B067	0.999957	5382798	9		aspA,glnA,gltA,glyA,pgm,tkt,uncA,porA,fn_gyrA	100	100	491.499	10	2	107	137	120	76	1	130	74	1	0	9	1080	B067___10___2___107___137___120___76___1___130___74	additional strain
NA	B068	NA	NA	NA	NA	NA	NA	NA	NA	NA	NA	NA	NA	NA	NA	NA	NA	NA	NA	NA	6025	0.066314	36	NA	NA	21-B068	0.999468	2335546	8	gltA	aspA,glnA,glyA,pgm,tkt,uncA,porA,fn_gyrA	100	95.365	451.819	4	7	2	4	1	7	1	44	7	3	5	3	418	B068___4___7___2___4___1___7___1___44___7	additional strain
NA	B076	NA	NA	NA	NA	NA	NA	NA	NA	NA	NA	NA	NA	NA	NA	NA	NA	NA	NA	NA	B067-020719-01	0.822818	21	NA	NA	21-B076	0.997379	4999472	9		aspA,glnA,gltA,glyA,pgm,tkt,uncA,porA,fn_gyrA	100	100	489.292	4	7	12	4	42	51	1	73	1	1	0	9	383	B076___4___7___12___4___42___51___1___73___1	additional strain
NA	B077	NA	NA	NA	NA	NA	NA	NA	NA	NA	NA	NA	NA	NA	NA	NA	NA	NA	NA	NA	B067-020719-01	0.813906	21	NA	NA	21-B077	0.997322	5658226	9		aspA,glnA,gltA,glyA,pgm,tkt,uncA,porA,fn_gyrA	100	100	489.358	4	7	12	4	42	51	1	73	1	1	0	9	383	B077___4___7___12___4___42___51___1___73___1	additional strain
NA	B078	NA	NA	NA	NA	NA	NA	NA	NA	NA	NA	NA	NA	NA	NA	NA	NA	NA	NA	NA	B067-020719-01	0.80011	21	NA	NA	21-B078	0.99849	3360253	9		aspA,glnA,gltA,glyA,pgm,tkt,uncA,porA,fn_gyrA	100	100	489.22	4	7	12	4	42	51	1	73	1	1	0	9	383	B078___4___7___12___4___42___51___1___73___1	additional strain
NA	B080	NA	NA	NA	NA	NA	NA	NA	NA	NA	NA	NA	NA	NA	NA	NA	NA	NA	NA	NA	B067-020719-01	0.803633	21	NA	NA	21-B080	0.997409	3207222	9		aspA,glnA,gltA,glyA,pgm,tkt,uncA,porA,fn_gyrA	100	100	489.236	4	7	12	4	42	51	1	73	1	1	0	9	383	B080___4___7___12___4___42___51___1___73___1	additional strain
NA	B082	NA	NA	NA	NA	NA	NA	NA	NA	NA	NA	NA	NA	NA	NA	NA	NA	NA	NA	NA	B067-020719-01	0.824787	21	NA	NA	21-B082	0.997666	1798330	9		aspA,glnA,gltA,glyA,pgm,tkt,uncA,porA,fn_gyrA	100	100	489.381	4	7	12	4	42	51	1	73	1	1	0	9	383	B082___4___7___12___4___42___51___1___73___1	additional strain
NA	B103	NA	NA	NA	NA	NA	NA	NA	NA	NA	NA	NA	NA	NA	NA	NA	NA	NA	NA	NA	B067-020719-01	0.782585	21	NA	NA	21-B103	0.999109	3072627	9		aspA,glnA,gltA,glyA,pgm,tkt,uncA,porA,fn_gyrA	100	100	489.268	4	7	12	4	42	51	1	73	1	1	0	9	383	B103___4___7___12___4___42___51___1___73___1	additional strain
NA	B155	NA	NA	NA	NA	NA	NA	NA	NA	NA	NA	NA	NA	NA	NA	NA	NA	NA	NA	NA	78931	0.31414	692	NA	NA	21-B155	0.994563	3021807	8	porA	aspA,glnA,gltA,glyA,pgm,tkt,uncA,fn_gyrA	100	100	474.126	37	52	57	26	127	29	23	3123	4	1	0	8	692	B155___37___52___57___26___127___29___23___3123___4	additional strain
NA	B189	NA	NA	NA	NA	NA	NA	NA	NA	NA	NA	NA	NA	NA	NA	NA	NA	NA	NA	NA	B183-300720-01	0.471928	256	NA	NA	B189	0.991858	10731339	9		aspA,glnA,gltA,glyA,pgm,tkt,uncA,porA,fn_gyrA	100	100	488.214	48	7	10	4	1	7	1	217	7	1	0	9	11	B189___48___7___10___4___1___7___1___217___7	additional strain
NA	B190	NA	NA	NA	NA	NA	NA	NA	NA	NA	NA	NA	NA	NA	NA	NA	NA	NA	NA	NA	B114-130819-03	0.473431	722	NA	NA	21-B190	0.999611	2142462	9		aspA,glnA,gltA,glyA,pgm,tkt,uncA,porA,fn_gyrA	100	100	493.055	96	135	99	136	183	140	113	2359	105	1	0	9	1277	B190___96___135___99___136___183___140___113___2359___105	additional strain
NA	B190	NA	NA	NA	NA	NA	NA	NA	NA	NA	NA	NA	NA	NA	NA	NA	NA	NA	NA	NA	B333-250521-01	0.371424	737	NA	NA	21-B190	0.997133	752195	4	gltA,glyA,pgm,tkt,porA	aspA,glnA,uncA,fn_gyrA	100	97.2225	451.235	98	122	98	891	180	150	113	970	101	2	1	3	11377	B190___98___122___98___891___180___150___113___970___101	additional strain
NA	B198	NA	NA	NA	NA	NA	NA	NA	NA	NA	NA	NA	NA	NA	NA	NA	NA	NA	NA	NA	B189-130820-01	1	233	NA	NA	21-B198	1	2522676	9		aspA,glnA,gltA,glyA,pgm,tkt,uncA,porA,fn_gyrA	100	100	492.2	2	1	4	28	58	672	58	6	36	1	0	9	8614	B198___2___1___4___28___58___672___58___6___36	additional strain
NA	B326	NA	NA	NA	NA	NA	NA	NA	NA	NA	NA	NA	NA	NA	NA	NA	NA	NA	NA	NA	B321-050521-01	0.411214	734	NA	NA	B326	0.999986	1443315	9		aspA,glnA,gltA,glyA,pgm,tkt,uncA,porA,fn_gyrA	100	100	494.367	64	33	78	18	1136	86	16	1598	11	1	0	9	11383	B326___64___33___78___18___1136___86___16___1598___11	additional strain
NA	B326	NA	NA	NA	NA	NA	NA	NA	NA	NA	NA	NA	NA	NA	NA	NA	NA	NA	NA	NA	B029-110619-02	0.13621	351	NA	NA	B326	0.999986	317344	9		aspA,glnA,gltA,glyA,pgm,tkt,uncA,porA,fn_gyrA	100	98.3278	452.828	61	70	22	18	2	74	47	860	31	3	1	8	448	B326___61___70___22___18___2___74___47___860___31	additional strain
NA	B329	NA	NA	NA	NA	NA	NA	NA	NA	NA	NA	NA	NA	NA	NA	NA	NA	NA	NA	NA	ERR904615_innuendo	0.018259	743	NA	NA	B329	0.992326	96540	5	pgm,tkt,uncA,porA	aspA,glnA,gltA,glyA,fn_gyrA	100	97.276	360.9	17	2	9	5	8	46	21	1683	80	2	1	4	1021	B329___17___2___9___5___8___46___21___1683___80	additional strain
NA	B331	NA	NA	NA	NA	NA	NA	NA	NA	NA	NA	NA	NA	NA	NA	NA	NA	NA	NA	NA	B046-180619-01	0.774934	62	NA	NA	B331	0.999957	4855265	9		aspA,glnA,gltA,glyA,pgm,tkt,uncA,porA,fn_gyrA	100	100	491.782	10	81	50	99	120	76	52	276	19	1	0	9	677	B331___10___81___50___99___120___76___52___276___19	additional strain
NA	B335	NA	NA	NA	NA	NA	NA	NA	NA	NA	NA	NA	NA	NA	NA	NA	NA	NA	NA	NA	59179	0.139106	611	NA	NA	B335	0.999151	592650	7	tkt,porA	aspA,glnA,gltA,glyA,pgm,uncA,fn_gyrA	100	100	472.704	64	467	71	100	134	101	16	2846	11	2	4	3	6592	B335___64___467___71___100___134___101___16___2846___11	additional strain
NA	B335	NA	NA	NA	NA	NA	NA	NA	NA	NA	NA	NA	NA	NA	NA	NA	NA	NA	NA	NA	B321-050521-01	0.115393	734	NA	NA	B335	0.999957	501980	9		aspA,glnA,gltA,glyA,pgm,tkt,uncA,porA,fn_gyrA	100	97.0122	482.831	64	33	78	18	1136	86	16	1598	11	3	3	6	11383	B335___64___33___78___18___1136___86___16___1598___11	additional strain
NA	B335	NA	NA	NA	NA	NA	NA	NA	NA	NA	NA	NA	NA	NA	NA	NA	NA	NA	NA	NA	B338-070621-02	0.062059	740	NA	NA	B335	0.999698	533310	9		aspA,glnA,gltA,glyA,pgm,tkt,uncA,porA,fn_gyrA	100	98.4378	469.766	64	226	203	189	652	54	16	2367	11	4	4	5	11379	B335___64___226___203___189___652___54___16___2367___11	additional strain
NA	B335	NA	NA	NA	NA	NA	NA	NA	NA	NA	NA	NA	NA	NA	NA	NA	NA	NA	NA	NA	B050-180619-01	0.053484	715	NA	NA	B335	0.999827	588077	9		aspA,glnA,gltA,glyA,pgm,tkt,uncA,porA,fn_gyrA	100	89.7767	458.981	64	22	148	100	94	187	16	2351	11	5	5	4	10813	B335___64___22___148___100___94___187___16___2351___11	additional strain
NA	B335	NA	NA	NA	NA	NA	NA	NA	NA	NA	NA	NA	NA	NA	NA	NA	NA	NA	NA	NA	B320-050521-02	0.042397	733	NA	NA	B335	0.999741	542595	8	fn_gyrA	aspA,glnA,gltA,glyA,pgm,tkt,uncA,porA	100	93.7075	469.811	64	22	20	100	242	204	16	1795	37	6	5	3	4570	B335___64___22___20___100___242___204___16___1795___37	additional strain
NA	B335	NA	NA	NA	NA	NA	NA	NA	NA	NA	NA	NA	NA	NA	NA	NA	NA	NA	NA	NA	B039-110619-03	0.016753	239	NA	NA	B335	0.998777	564422	7	gltA,porA	aspA,glnA,glyA,pgm,tkt,uncA,fn_gyrA	100	90.6071	447.492	64	89	319	100	134	103	16	1224	11	8	5	2	10820	B335___64___89___319___100___134___103___16___1224___11	additional strain
NA	B336	NA	NA	NA	NA	NA	NA	NA	NA	NA	NA	NA	NA	NA	NA	NA	NA	NA	NA	NA	50477	0.073375	320	NA	NA	B336	0.999742	798093	8	gltA	aspA,glnA,glyA,pgm,tkt,uncA,porA,fn_gyrA	100	97.8512	481.925	277	105	20	143	134	54	16	348	11	3	3	5	6451	B336___277___105___20___143___134___54___16___348___11	additional strain
NA	B337	NA	NA	NA	NA	NA	NA	NA	NA	NA	NA	NA	NA	NA	NA	NA	NA	NA	NA	NA	B321-050521-01	0.085308	734	NA	NA	B337	0.999986	118670	8	pgm	aspA,glnA,gltA,glyA,tkt,uncA,porA,fn_gyrA	100	92.9213	422.276	64	33	78	18	1136	86	16	1598	11	3	0	8	11383	B337___64___33___78___18___1136___86___16___1598___11	additional strain
NA	B337	NA	NA	NA	NA	NA	NA	NA	NA	NA	NA	NA	NA	NA	NA	NA	NA	NA	NA	NA	50656	0.041294	321	NA	NA	B337	0.999799	68658	9		aspA,glnA,gltA,glyA,pgm,tkt,uncA,porA,fn_gyrA	100	97.8644	396.998	27	22	22	104	115	86	31	680	39	4	1	8	8368	B337___27___22___22___104___115___86___31___680___39	additional strain
NA	B337	NA	NA	NA	NA	NA	NA	NA	NA	NA	NA	NA	NA	NA	NA	NA	NA	NA	NA	NA	21323	0.012208	62	NA	NA	B337	0.995866	15370	7	aspA,glyA	glnA,gltA,pgm,tkt,uncA,porA,fn_gyrA	100	85.56	251.803	10	81	50	87	120	76	52	276	19	5	0	7	794	B337___10___81___50___87___120___76___52___276___19	additional strain
NA	B337	NA	NA	NA	NA	NA	NA	NA	NA	NA	NA	NA	NA	NA	NA	NA	NA	NA	NA	NA	80565	0.010582	709	NA	NA	B337	0.993081	31547	4	glnA,glyA,tkt,porA,fn_gyrA	aspA,gltA,pgm,uncA	100	98.6675	405.518	18	89	77	98	138	17	16	1612	36	6	1	3	10035	B337___18___89___77___98___138___17___16___1612___36	additional strain
NA	B338	NA	NA	NA	NA	NA	NA	NA	NA	NA	NA	NA	NA	NA	NA	NA	NA	NA	NA	NA	B321-050521-01	0.209499	734	NA	NA	B338	0.999957	1534667	9		aspA,glnA,gltA,glyA,pgm,tkt,uncA,porA,fn_gyrA	100	100	489.99	64	33	78	18	1136	86	16	1598	11	2	3	6	11383	B338___64___33___78___18___1136___86___16___1598___11	additional strain
NA	B338	NA	NA	NA	NA	NA	NA	NA	NA	NA	NA	NA	NA	NA	NA	NA	NA	NA	NA	NA	33958	0.01584	489	NA	NA	B338	0.997493	1367221	6	tkt,uncA,porA	aspA,glnA,gltA,glyA,pgm,fn_gyrA	100	100	450.544	64	288	203	189	134	94	60	1603	11	3	4	2	7820	B338___64___288___203___189___134___94___60___1603___11	additional strain
NA	B342	NA	NA	NA	NA	NA	NA	NA	NA	NA	NA	NA	NA	NA	NA	NA	NA	NA	NA	NA	34524	0.843148	14	NA	NA	B342	0.999871	4077625	8	pgm	aspA,glnA,gltA,glyA,tkt,uncA,porA,fn_gyrA	100	100	491.138	8	10	2	2	11	12	6	957	8	1	0	8	354	B342___8___10___2___2___11___12___6___957___8	additional strain
NA	B345	NA	NA	NA	NA	NA	NA	NA	NA	NA	NA	NA	NA	NA	NA	NA	NA	NA	NA	NA	B325-250521-01	0.112014	211	NA	NA	B345	0.995757	899277	9		aspA,glnA,gltA,glyA,pgm,tkt,uncA,porA,fn_gyrA	100	100	481.9	17	5	8	5	8	2	4	909	31	2	0	9	563	B345___17___5___8___5___8___2___4___909___31	additional strain
NA	B354	NA	NA	NA	NA	NA	NA	NA	NA	NA	NA	NA	NA	NA	NA	NA	NA	NA	NA	NA	B046-180619-01	0.056211	62	NA	NA	B354	0.999743	24510	9		aspA,glnA,gltA,glyA,pgm,tkt,uncA,porA,fn_gyrA	100	86.5667	406.264	10	81	50	99	120	76	52	276	19	2	0	9	677	B354___10___81___50___99___120___76___52___276___19	additional strain
NA	B355	NA	NA	NA	NA	NA	NA	NA	NA	NA	NA	NA	NA	NA	NA	NA	NA	NA	NA	NA	62524	0.029017	216	NA	NA	B355	0.998343	110069	9		aspA,glnA,gltA,glyA,pgm,tkt,uncA,porA,fn_gyrA	100	97.8589	384.095	35	43	8	51	8	2	21	634	31	3	0	9	2162	B355___35___43___8___51___8___2___21___634___31	additional strain
NA	B358	NA	NA	NA	NA	NA	NA	NA	NA	NA	NA	NA	NA	NA	NA	NA	NA	NA	NA	NA	22296	0.258084	21	NA	NA	B358	0.99987	1964271	8	glnA	aspA,gltA,glyA,pgm,tkt,uncA,porA,fn_gyrA	100	98.845	479.659	4	326	40	4	42	51	1	73	1	2	3	5	6234	B358___4___326___40___4___42___51___1___73___1	additional strain
NA	B362	NA	NA	NA	NA	NA	NA	NA	NA	NA	NA	NA	NA	NA	NA	NA	NA	NA	NA	NA	B046-180619-01	0.099071	62	NA	NA	B362	0.999928	200254	9		aspA,glnA,gltA,glyA,pgm,tkt,uncA,porA,fn_gyrA	100	99.89	461.054	10	81	50	99	120	76	52	276	19	2	0	9	677	B362___10___81___50___99___120___76___52___276___19	additional strain
NA	W022	NA	NA	NA	NA	NA	NA	NA	NA	NA	NA	NA	NA	NA	NA	NA	NA	NA	NA	NA	42540	0.503319	164	NA	NA	W022	0.998199	2627421	9		aspA,glnA,gltA,glyA,pgm,tkt,uncA,porA,fn_gyrA	100	100	489.149	35	43	9	5	121	46	21	468	80	1	0	9	683	W022___35___43___9___5___121___46___21___468___80	additional strain
NA	W026	NA	NA	NA	NA	NA	NA	NA	NA	NA	NA	NA	NA	NA	NA	NA	NA	NA	NA	NA	78931	0.239241	692	NA	NA	W026	0.997402	299523	8	porA	aspA,glnA,gltA,glyA,pgm,tkt,uncA,fn_gyrA	100	100	465.914	37	52	57	26	127	29	23	3123	4	1	0	8	692	W026___37___52___57___26___127___29___23___3123___4	additional strain
NA	W026	NA	NA	NA	NA	NA	NA	NA	NA	NA	NA	NA	NA	NA	NA	NA	NA	NA	NA	NA	78944	0.095749	349	NA	NA	W026	0.999814	64594	8	glyA	aspA,glnA,gltA,pgm,tkt,uncA,porA,fn_gyrA	100	83.3838	341.233	2	29	4	48	13	24	57	819	13	4	0	8	693	W026___2___29___4___48___13___24___57___819___13	additional strain
NA	W052	NA	NA	NA	NA	NA	NA	NA	NA	NA	NA	NA	NA	NA	NA	NA	NA	NA	NA	NA	6436	0.122379	220	NA	NA	W052	0.992934	969276	4	glnA,glyA,pgm,porA,fn_gyrA	aspA,gltA,tkt,uncA	100	100	451.051	2	4	84	105	236	25	57	152	13	2	1	3	1397	W052___2___4___84___105___236___25___57___152___13	additional strain
NA	W052	NA	NA	NA	NA	NA	NA	NA	NA	NA	NA	NA	NA	NA	NA	NA	NA	NA	NA	NA	51516	0.122343	234	NA	NA	W052	0.991369	1175942	5	gltA,pgm,porA,fn_gyrA	aspA,glnA,glyA,tkt,uncA	100	100	475.532	2	29	4	48	10	25	57	886	13	3	3	2	2875	W052___2___29___4___48___10___25___57___886___13	additional strain
NA	W052	NA	NA	NA	NA	NA	NA	NA	NA	NA	NA	NA	NA	NA	NA	NA	NA	NA	NA	NA	77684	0.102521	237	NA	NA	W052	0.993796	1098299	7	gltA,pgm	aspA,glnA,glyA,tkt,uncA,porA,fn_gyrA	100	96.7057	448.598	2	59	4	48	126	29	23	188	4	4	5	2	4187	W052___2___59___4___48___126___29___23___188___4	additional strain
NA	W053	NA	NA	NA	NA	NA	NA	NA	NA	NA	NA	NA	NA	NA	NA	NA	NA	NA	NA	NA	112078	0.093399	246	NA	NA	W053	0.999655	23510	8	aspA	glnA,gltA,glyA,pgm,tkt,uncA,porA,fn_gyrA	100	92.9013	350.66	1	7	10	349	261	7	1	2027	7	1	0	8	3904	W053___1___7___10___349___261___7___1___2027___7	additional strain
NA	W053	NA	NA	NA	NA	NA	NA	NA	NA	NA	NA	NA	NA	NA	NA	NA	NA	NA	NA	NA	79263	0.043073	698	NA	NA	W053	0.998951	50441	7	porA,fn_gyrA	aspA,glnA,gltA,glyA,pgm,tkt,uncA	100	100	424.928	17	2	8	5	8	2	4	1836	80	7	1	6	177	W053___17___2___8___5___8___2___4___1836___80	additional strain
NA	W053	NA	NA	NA	NA	NA	NA	NA	NA	NA	NA	NA	NA	NA	NA	NA	NA	NA	NA	NA	79265	0.026437	350	NA	NA	W053	0.998879	29614	6	aspA,glyA,porA	glnA,gltA,pgm,tkt,uncA,fn_gyrA	99.9533	91.585	316.225	35	2	8	51	361	2	21	3144	31	14	4	2	2538	W053___35___2___8___51___361___2___21___3144___31	additional strain
NA	W054	NA	NA	NA	NA	NA	NA	NA	NA	NA	NA	NA	NA	NA	NA	NA	NA	NA	NA	NA	42534	0.066781	211	NA	NA	W054	0.998933	37584	8	uncA	aspA,glnA,gltA,glyA,pgm,tkt,porA,fn_gyrA	99.9688	92.81	412.277	17	5	8	5	8	2	4	2648	31	2	0	8	563	W054___17___5___8___5___8___2___4___2648___31	additional strain
NA	W078	NA	NA	NA	NA	NA	NA	NA	NA	NA	NA	NA	NA	NA	NA	NA	NA	NA	NA	NA	57334	0.101773	40	NA	NA	W078	0.997766	79612	9		aspA,glnA,gltA,glyA,pgm,tkt,uncA,porA,fn_gyrA	100	100	435.504	4	7	10	4	1	7	1	217	80	1	0	9	45	W078___4___7___10___4___1___7___1___217___80	additional strain
NA	W079	NA	NA	NA	NA	NA	NA	NA	NA	NA	NA	NA	NA	NA	NA	NA	NA	NA	NA	NA	B113-130819-01	0.254012	720	NA	NA	W079	0.999971	250667	9		aspA,glnA,gltA,glyA,pgm,tkt,uncA,porA,fn_gyrA	100	100	462.476	64	70	68	97	122	106	16	127	36	1	0	9	801	W079___64___70___68___97___122___106___16___127___36	additional strain
NA	W079	NA	NA	NA	NA	NA	NA	NA	NA	NA	NA	NA	NA	NA	NA	NA	NA	NA	NA	NA	109829	0.049151	3	NA	NA	W079	1	103065	8	porA	aspA,glnA,gltA,glyA,pgm,tkt,uncA,fn_gyrA	100	98.6375	393.406	2	1	5	3	2	1	5	582	8	7	1	7	19	W079___2___1___5___3___2___1___5___582___8	additional strain
NA	W081	NA	NA	NA	NA	NA	NA	NA	NA	NA	NA	NA	NA	NA	NA	NA	NA	NA	NA	NA	B063-020719-01	0.106305	226	NA	NA	W081	0.997425	248147	7	gltA,porA	aspA,glnA,glyA,pgm,tkt,uncA,fn_gyrA	100	100	460.528	17	2	670	5	8	2	4	236	31	1	0	7	11384	W081___17___2___670___5___8___2___4___236___31	additional strain
NA	W081	NA	NA	NA	NA	NA	NA	NA	NA	NA	NA	NA	NA	NA	NA	NA	NA	NA	NA	NA	B336-070621-02	0.020618	739	NA	NA	W081	0.994664	181125	6	aspA,glnA,porA	gltA,glyA,pgm,tkt,uncA,fn_gyrA	100	92.7067	439.525	35	5	9	5	8	2	2	1836	31	14	4	2	1481	W081___35___5___9___5___8___2___2___1836___31	additional strain
NA	W082	NA	NA	NA	NA	NA	NA	NA	NA	NA	NA	NA	NA	NA	NA	NA	NA	NA	NA	NA	B037-110619-01	0.084161	58	NA	NA	W082	0.994046	53546	9		aspA,glnA,gltA,glyA,pgm,tkt,uncA,porA,fn_gyrA	100	100	367.727	4	7	10	4	1	7	1	49	7	2	0	9	45	W082___4___7___10___4___1___7___1___49___7	additional strain
NA	W083	NA	NA	NA	NA	NA	NA	NA	NA	NA	NA	NA	NA	NA	NA	NA	NA	NA	NA	NA	B121-270819-02	0.029774	724	NA	NA	W083	0.991184	15404	7	glnA,gltA	aspA,glyA,pgm,tkt,uncA,porA,fn_gyrA	100	90.9486	265.934	64	105	20	77	94	103	16	1634	11	9	1	6	6591	W083___64___105___20___77___94___103___16___1634___11	additional strain
NA	W083	NA	NA	NA	NA	NA	NA	NA	NA	NA	NA	NA	NA	NA	NA	NA	NA	NA	NA	NA	42085	0.029282	536	NA	NA	W083	0.991501	21781	7	aspA,uncA	glnA,gltA,glyA,pgm,tkt,porA,fn_gyrA	100	88.2143	300.682	27	2	22	104	43	86	31	270	31	10	1	6	1231	W083___27___2___22___104___43___86___31___270___31	additional strain
NA	W083	NA	NA	NA	NA	NA	NA	NA	NA	NA	NA	NA	NA	NA	NA	NA	NA	NA	NA	NA	79263	0.024487	698	NA	NA	W083	0.992754	25084	7	porA,fn_gyrA	aspA,glnA,gltA,glyA,pgm,tkt,uncA	99.9671	99.5014	283.356	17	2	8	5	8	2	4	1836	80	17	1	6	177	W083___17___2___8___5___8___2___4___1836___80	additional strain
NA	W084	NA	NA	NA	NA	NA	NA	NA	NA	NA	NA	NA	NA	NA	NA	NA	NA	NA	NA	NA	42085	0.213993	536	NA	NA	W084	0.997895	237312	7	aspA,fn_gyrA	glnA,gltA,glyA,pgm,tkt,uncA,porA	100	100	484.422	27	2	22	104	43	86	31	270	31	1	0	7	1231	W084___27___2___22___104___43___86___31___270___31	additional strain
NA	W084	NA	NA	NA	NA	NA	NA	NA	NA	NA	NA	NA	NA	NA	NA	NA	NA	NA	NA	NA	30736	0.0192	187	NA	NA	W084	0.993986	5326	2	aspA,glnA,gltA,glyA,pgm,porA,fn_gyrA	tkt,uncA	100	93.135	272.765	7	4	1	2	11	1	5	131	9	16	0	2	2333	W084___7___4___1___2___11___1___5___131___9	additional strain
NA	W087	NA	NA	NA	NA	NA	NA	NA	NA	NA	NA	NA	NA	NA	NA	NA	NA	NA	NA	NA	B339-070621-01	0.668439	21	NA	NA	W087	0.999928	1387262	9		aspA,glnA,gltA,glyA,pgm,tkt,uncA,porA,fn_gyrA	100	100	488.201	4	7	40	4	42	51	1	73	1	1	0	9	267	W087___4___7___40___4___42___51___1___73___1	additional strain
NA	W087	NA	NA	NA	NA	NA	NA	NA	NA	NA	NA	NA	NA	NA	NA	NA	NA	NA	NA	NA	B320-050521-02	0.092687	733	NA	NA	W087	0.999942	199976	9		aspA,glnA,gltA,glyA,pgm,tkt,uncA,porA,fn_gyrA	100	98.23	468.469	64	22	20	100	242	204	16	1795	37	2	1	8	4570	W087___64___22___20___100___242___204___16___1795___37	additional strain
B015-230519-01	B015	Bird	Cygnus	C. jejuni	45	ST-45 complex	4	7	10	4	1	7	1	2052	7	467	B015-230519-01.fasta	TRUE	2019-05-23T00:00:00Z	Dudelange	107511	0.964241	193	9		B015	0.999405	11621274	9		aspA,glnA,gltA,glyA,pgm,tkt,uncA,porA,fn_gyrA	100	100	490.637	4	7	10	4	1	7	1	467	7	1	0	9	45	B015___4___7___10___4___1___7___1___467___7	9MLST match
B021-070519-01	B021	Bird	Corvus corone	C. jejuni	48	ST-48 complex	2	4	1	2	7	1	5	153	3	7	B021-070519-01.fasta	TRUE	2019-05-07T00:00:00Z	Dudelange	6112	0.532037	2	9		21-B021	0.999534	1989308	9		aspA,glnA,gltA,glyA,pgm,tkt,uncA,porA,fn_gyrA	100	100	490.924	2	4	1	2	7	1	5	7	3	1	0	9	48	B021___2___4___1___2___7___1___5___7___3	9MLST match
B023-070519-01	B023	Bird	Corvus corone	C. jejuni	448	?	61	70	22	18	2	74	47	2154	102	2353	B023-070519-01.fasta	TRUE	2019-05-07T00:00:00Z	Dudelange	61220	0.907665	852	7	porA,fn_gyrA	21-B023	0.997241	2502448	8	porA	aspA,glnA,gltA,glyA,pgm,tkt,uncA,fn_gyrA	100	95.7913	427.105	61	70	22	18	2	74	47	2034	31	1	0	8	448	B023___61___70___22___18___2___74___47___2034___31	partial match
B026-230519-01	B026	Bird	Pica pica	C. jejuni	448	?	61	70	22	18	2	74	47	2154	102	2353	B026-230519-01.fasta	TRUE	2019-05-23T00:00:00Z	Dudelange	61220	0.898355	852	7	porA,fn_gyrA	21-B026	0.997327	2308732	7	porA,fn_gyrA	aspA,glnA,gltA,glyA,pgm,tkt,uncA	100	100	471.836	61	70	22	18	2	74	47	2034	31	1	0	7	448	B026___61___70___22___18___2___74___47___2034___31	partial match
B028-230519-01	B028	Bird	Corvus corone	C. jejuni	2491	?	64	22	212	100	134	233	16	2156	11	1634	B028-230519-01.fasta	TRUE	2019-05-23T00:00:00Z	Dudelange	22260	0.176496	685	8	porA	B028	0.995924	952771	7	aspA,porA	glnA,gltA,glyA,pgm,tkt,uncA,fn_gyrA	100	98.3829	459.022	64	22	212	100	134	233	16	1157	11	2	0	7	2491	B028___64___22___212___100___134___233___16___1157___11	partial match
B029-110619-02	B029	Bird	Pica pica	C. jejuni	448	?	61	70	22	18	2	74	47	2624	31	860	B029-110619-02.fasta	TRUE	2019-06-11T00:00:00Z	Dudelange	46554	0.603074	781	8	porA	21-B029	0.994915	3272945	8	porA	aspA,glnA,gltA,glyA,pgm,tkt,uncA,fn_gyrA	100	100	474.749	61	70	22	18	2	74	47	451	31	1	0	8	448	B029___61___70___22___18___2___74___47___451___31	partial match
B036-110619-03	B036	Bird	Corvus monedula	C. jejuni	10813	?	64	22	148	100	94	187	16	2157	11	2351	B036-110619-03.fasta	TRUE	2019-06-11T00:00:00Z	Dudelange	NA	NA	NA	5	glnA,gltA,tkt,porA	NA	NA	NA	NA	NA	NA	NA	NA	NA	NA	NA	NA	NA	NA	NA	NA	NA	NA	NA	NA	NA	NA	NA	false negative
B036-110619-01	B036	Bird	Corvus monedula	C. jejuni	1540	ST-1275 complex	76	33	22	104	43	109	31	2157	40	860	B036-110619-01.fasta	TRUE	2019-06-11T00:00:00Z	Dudelange	50086	0.196516	796	8	porA	B036	0.998347	1665836	8	porA	aspA,glnA,gltA,glyA,pgm,tkt,uncA,fn_gyrA	100	100	469.498	76	33	22	104	43	109	31	1353	40	1	0	8	1540	B036___76___33___22___104___43___109___31___1353___40	partial match
B037-110619-01	B037	Bird	Corvus monedula	C. jejuni	45	ST-45 complex	4	7	10	4	1	7	1	2158	7	49	B037-110619-01.fasta	TRUE	2019-06-11T00:00:00Z	Dudelange	107526	0.06814	87	8	porA	B037	0.998939	310164	8	porA	aspA,glnA,gltA,glyA,pgm,tkt,uncA,fn_gyrA	100	97.6813	443.105	4	7	10	4	1	7	1	180	7	2	0	8	45	B037___4___7___10___4___1___7___1___180___7	partial match
B038-110619-03	B038	Bird	Corvus monedula	C. jejuni	10817	?	258	174	154	193	336	421	131	2161	103	2354	B038-110619-03.fasta	TRUE	2019-06-11T00:00:00Z	Dudelange	NA	NA	NA	0	aspA,glnA,gltA,glyA,pgm,tkt,uncA,porA,fn_gyrA	NA	NA	NA	NA	NA	NA	NA	NA	NA	NA	NA	NA	NA	NA	NA	NA	NA	NA	NA	NA	NA	NA	NA	false negative
B038-110619-01	B038	Bird	Corvus monedula	C. jejuni	10818	?	64	22	20	100	134	301	16	2159	104	391	B038-110619-01.fasta	TRUE	2019-06-11T00:00:00Z	Dudelange	NA	NA	NA	3	glnA,gltA,glyA,tkt,porA,fn_gyrA	NA	NA	NA	NA	NA	NA	NA	NA	NA	NA	NA	NA	NA	NA	NA	NA	NA	NA	NA	NA	NA	NA	NA	false negative
B038-110619-02	B038	Bird	Corvus monedula	C. jejuni	10811	?	64	33	20	181	94	17	16	2160	36	1279	B038-110619-02.fasta	TRUE	2019-06-11T00:00:00Z	Dudelange	NA	NA	NA	5	gltA,glyA,porA,fn_gyrA	NA	NA	NA	NA	NA	NA	NA	NA	NA	NA	NA	NA	NA	NA	NA	NA	NA	NA	NA	NA	NA	NA	NA	false negative
B039-110619-03	B039	Bird	Corvus monedula	C. jejuni	10820	?	64	89	319	100	134	103	16	2162	11	1224	B039-110619-03.fasta	TRUE	2019-06-11T00:00:00Z	Dudelange	10778	0.772399	416	8	pgm	21-B039	0.999448	4645015	9		aspA,glnA,gltA,glyA,pgm,tkt,uncA,porA,fn_gyrA	100	96.3411	448.672	64	89	319	100	94	103	16	1224	11	1	0	9	4835	B039___64___89___319___100___94___103___16___1224___11	partial match
B045-180619-01	B045	Bird	Corvus monedula	C. jejuni	464	ST-464 complex	24	2	2	2	10	3	1	596	3	2348	B045-180619-01.fasta	TRUE	2019-06-18T00:00:00Z	Dudelange	108318	0.606812	68	8	porA	B045	0.995888	3467946	9		aspA,glnA,gltA,glyA,pgm,tkt,uncA,porA,fn_gyrA	99.9722	95.8633	462.407	24	2	2	2	10	3	1	2178	3	1	0	9	464	B045___24___2___2___2___10___3___1___2178___3	partial match
B047-180619-01	B047	Bird	Falco	C. jejuni	19	ST-21 complex	2	1	5	3	2	1	5	2165	8	327	B047-180619-01.fasta	TRUE	2019-06-18T00:00:00Z	Dudelange	28983	0.524822	138	9		B047	0.995501	6990574	9		aspA,glnA,gltA,glyA,pgm,tkt,uncA,porA,fn_gyrA	100	100	490.611	2	1	5	3	2	1	5	327	8	1	0	9	19	B047___2___1___5___3___2___1___5___327___8	9MLST match
B050-180619-02	B050	Bird	Corvus monedula	C. jejuni	1080	?	10	2	107	137	120	76	1	2301	74	130	B050-180619-02.fasta	TRUE	2019-06-18T00:00:00Z	Dudelange	42536	0.148031	308	9		B050	0.997497	894039	9		aspA,glnA,gltA,glyA,pgm,tkt,uncA,porA,fn_gyrA	100	100	473.991	10	2	107	137	120	76	1	130	74	1	0	9	1080	B050___10___2___107___137___120___76___1___130___74	9MLST match
B050-180619-01	B050	Bird	Corvus monedula	C. jejuni	10813	?	64	22	148	100	94	187	16	2166	11	2351	B050-180619-01.fasta	TRUE	2019-06-18T00:00:00Z	Dudelange	NA	NA	NA	4	gltA,pgm,uncA,porA,fn_gyrA	NA	NA	NA	NA	NA	NA	NA	NA	NA	NA	NA	NA	NA	NA	NA	NA	NA	NA	NA	NA	NA	NA	NA	false negative
B051-180619-02	B051	Bird	Corvus corone	C. jejuni	10815	?	18	81	68	143	134	153	16	2167	11	479	B051-180619-02.fasta	TRUE	2019-06-18T00:00:00Z	Dudelange	NA	NA	NA	6	gltA,porA,fn_gyrA	NA	NA	NA	NA	NA	NA	NA	NA	NA	NA	NA	NA	NA	NA	NA	NA	NA	NA	NA	NA	NA	NA	NA	false negative
B052-180619-01	B052	Bird	Corvus monedula	C. jejuni	7815	?	64	105	203	100	134	94	16	2168	11	2352	B052-180619-01.fasta	TRUE	2019-06-18T00:00:00Z	Dudelange	NA	NA	NA	4	glnA,gltA,glyA,tkt,porA	NA	NA	NA	NA	NA	NA	NA	NA	NA	NA	NA	NA	NA	NA	NA	NA	NA	NA	NA	NA	NA	NA	NA	false negative
B054-180619-01	B054	Bird	Corvus corone	C. jejuni	3536	?	64	22	20	100	134	160	16	2169	104	391	B054-180619-01.fasta	TRUE	2019-06-18T00:00:00Z	Dudelange	NA	NA	NA	2	glnA,gltA,glyA,pgm,tkt,porA,fn_gyrA	NA	NA	NA	NA	NA	NA	NA	NA	NA	NA	NA	NA	NA	NA	NA	NA	NA	NA	NA	NA	NA	NA	NA	false negative
B054-180619-02	B054	Bird	Corvus corone	C. jejuni	801	?	64	70	68	97	122	106	16	2598	36	127	B054-180619-02.fasta	TRUE	2019-06-18T00:00:00Z	Dudelange	6083	0.074611	849	9		B054	0.999703	2851339	9		aspA,glnA,gltA,glyA,pgm,tkt,uncA,porA,fn_gyrA	100	100	473.857	64	70	68	97	122	106	16	127	36	2	4	5	801	B054___64___70___68___97___122___106___16___127___36	9MLST match
B063-020719-02	B063	Bird	Apus apus	C. jejuni	22	ST-22 complex	1	3	6	4	3	3	3	277	8	70	B063-020719-02.fasta	TRUE	2019-07-02T00:00:00Z	Dudelange	14651	0.052687	22	8	fn_gyrA	21-B063	0.999151	897586	9		aspA,glnA,gltA,glyA,pgm,tkt,uncA,porA,fn_gyrA	100	94.8633	326.29	1	3	6	4	3	3	3	70	1	5	2	7	22	B063___1___3___6___4___3___3___3___70___1	partial match
B063-020719-01	B063	Bird	Apus apus	C. jejuni	11384	ST-177 complex	17	2	670	5	8	2	4	2170	31	236	B063-020719-01.fasta	TRUE	2019-07-02T00:00:00Z	Dudelange	61999	0.128246	116	8	gltA	21-B063	0.997496	981599	9		aspA,glnA,gltA,glyA,pgm,tkt,uncA,porA,fn_gyrA	100	96.39	435.391	17	2	8	5	8	2	4	236	31	3	0	9	177	B063___17___2___8___5___8___2___4___236___31	partial match
B067-020719-01	B067	Bird	Pica pica	C. jejuni	383	ST-283 complex	4	7	12	4	42	51	1	251	1	73	B067-020719-01.fasta	TRUE	2019-07-02T00:00:00Z	Dudelange	30778	0.174719	52	9		21-B067	0.99966	1632758	9		aspA,glnA,gltA,glyA,pgm,tkt,uncA,porA,fn_gyrA	100	99.6511	470.969	4	7	12	4	42	51	1	73	1	2	1	8	383	B067___4___7___12___4___42___51___1___73___1	9MLST match
B068-020719-02	B068	Bird	Pica pica	C. jejuni	383	ST-283 complex	4	7	12	4	42	51	1	251	1	73	B068-020719-02.fasta	TRUE	2019-07-02T00:00:00Z	Dudelange	30778	0.746601	52	9		21-B068	0.999703	4780879	9		aspA,glnA,gltA,glyA,pgm,tkt,uncA,porA,fn_gyrA	100	100	489.246	4	7	12	4	42	51	1	73	1	1	0	9	383	B068___4___7___12___4___42___51___1___73___1	9MLST match
B071-020719-01	B071	Bird	Corvus corone	C. jejuni	45	ST-45 complex	4	7	10	4	1	7	1	2171	7	44	B071-020719-01.fasta	TRUE	2019-07-02T00:00:00Z	Dudelange	42542	0.473936	28	9		21-B071	0.996389	3624385	9		aspA,glnA,gltA,glyA,pgm,tkt,uncA,porA,fn_gyrA	100	100	492.27	4	7	10	4	1	7	1	44	7	1	0	9	45	B071___4___7___10___4___1___7___1___44___7	9MLST match
B083-160719-02	B083	Bird	Falco	C. jejuni	383	ST-283 complex	4	7	12	4	42	51	1	251	1	73	B083-160719-02.fasta	TRUE	2019-07-15T00:00:00Z	Dudelange	30778	0.871329	52	9		21-B083	0.999533	4291952	9		aspA,glnA,gltA,glyA,pgm,tkt,uncA,porA,fn_gyrA	100	100	489.379	4	7	12	4	42	51	1	73	1	1	0	9	383	B083___4___7___12___4___42___51___1___73___1	9MLST match
B086-160719-01	B086	Bird	Columba	C. jejuni	383	ST-283 complex	4	7	12	4	42	51	1	251	1	73	B086-160719-01.fasta	TRUE	2019-07-15T00:00:00Z	Dudelange	30778	0.865102	52	9		21-B086	0.999576	1914340	9		aspA,glnA,gltA,glyA,pgm,tkt,uncA,porA,fn_gyrA	100	100	489.285	4	7	12	4	42	51	1	73	1	1	0	9	383	B086___4___7___12___4___42___51___1___73___1	9MLST match
B096-300719-02	B096	Bird	Corvus corone	C. jejuni	951	?	18	100	82	24	138	116	63	2277	31	2358	B096-300719-02.fasta	TRUE	2019-07-30T00:00:00Z	Dudelange	48448	1	788	9		21-B096	0.999915	2110629	9		aspA,glnA,gltA,glyA,pgm,tkt,uncA,porA,fn_gyrA	100	100	496.241	18	100	82	24	138	116	63	2358	31	1	0	9	951	B096___18___100___82___24___138___116___63___2358___31	9MLST match
B100-300719-02	B100	Bird	Apus apus	C. jejuni	475	ST-48 complex	2	4	1	4	19	62	5	827	5	67	B100-300719-02.fasta	TRUE	2019-07-30T00:00:00Z	Dudelange	NA	NA	NA	1	aspA,glnA,gltA,pgm,tkt,uncA,porA,fn_gyrA	NA	NA	NA	NA	NA	NA	NA	NA	NA	NA	NA	NA	NA	NA	NA	NA	NA	NA	NA	NA	NA	NA	NA	false negative
B100-300719-01	B100	Bird	Apus apus	C. jejuni	383	ST-283 complex	4	7	12	4	42	51	1	251	1	73	B100-300719-01.fasta	TRUE	2019-07-30T00:00:00Z	Dudelange	30778	0.906916	52	9		B100	0.999622	569431	9		aspA,glnA,gltA,glyA,pgm,tkt,uncA,porA,fn_gyrA	100	100	489.42	4	7	12	4	42	51	1	73	1	1	0	9	383	B100___4___7___12___4___42___51___1___73___1	9MLST match
B103-300719-02	B103	Bird	Turdus	C. jejuni	177	ST-177 complex	17	2	8	5	8	2	4	2172	31	236	B103-300719-02.fasta	TRUE	2019-07-30T00:00:00Z	Dudelange	111041	0.040368	116	8	gltA	21-B103	0.99669	80410	8	glnA	aspA,gltA,glyA,pgm,tkt,uncA,porA,fn_gyrA	100	95.0312	407.096	17	2	670	5	8	2	4	236	31	3	0	8	11384	B103___17___2___670___5___8___2___4___236___31	partial match
B112-130819-01	B112	Bird	Corvus corone	C. jejuni	7882	?	64	583	22	111	122	303	16	2599	36	2357	B112-130819-01.fasta	TRUE	2019-08-13T00:00:00Z	Dudelange	34069	1	738	9		21-B112	1	3159542	9		aspA,glnA,gltA,glyA,pgm,tkt,uncA,porA,fn_gyrA	100	100	495.14	64	583	22	111	122	303	16	2357	36	1	0	9	7882	B112___64___583___22___111___122___303___16___2357___36	9MLST match
B121-270819-02	B121	Bird	Corvus corone	C. jejuni	6591	?	64	105	20	77	94	103	16	2602	11	1634	B121-270819-02.fasta	TRUE	2019-08-27T00:00:00Z	Dudelange	69254	1	873	9		21-B121	1	2208442	9		aspA,glnA,gltA,glyA,pgm,tkt,uncA,porA,fn_gyrA	100	100	495.302	64	105	20	77	94	103	16	1634	11	1	0	9	6591	B121___64___105___20___77___94___103___16___1634___11	9MLST match
B122-270819-02	B122	Bird	Buteo	C. jejuni	19	ST-21 complex	2	1	5	3	2	1	5	2165	8	327	B122-270819-02.fasta	TRUE	2019-08-27T00:00:00Z	Dudelange	28983	0.525709	138	9		21-B122	0.997947	298155	9		aspA,glnA,gltA,glyA,pgm,tkt,uncA,porA,fn_gyrA	100	100	492.107	2	1	5	3	2	1	5	327	8	1	0	9	19	B122___2___1___5___3___2___1___5___327___8	9MLST match
B123-270819-01	B123	Bird	Falco	C. jejuni	19	ST-21 complex	2	1	5	3	2	1	5	2165	8	327	B123-270819-01.fasta	TRUE	2019-08-27T00:00:00Z	Dudelange	28983	0.559601	138	9		B123	0.995757	578911	9		aspA,glnA,gltA,glyA,pgm,tkt,uncA,porA,fn_gyrA	100	100	492.207	2	1	5	3	2	1	5	327	8	1	0	9	19	B123___2___1___5___3___2___1___5___327___8	9MLST match
B158-221019-01	B158	Bird	Corvus corone	C. jejuni	5846	?	76	105	72	104	124	96	31	2304	40	858	B158-221019-01.fasta	TRUE	2019-10-22T00:00:00Z	Dudelange	NA	NA	NA	6	gltA,pgm,tkt	NA	NA	NA	NA	NA	NA	NA	NA	NA	NA	NA	NA	NA	NA	NA	NA	NA	NA	NA	NA	NA	NA	NA	false negative
B167-230720-01	B167	Bird	Apus apus	C. jejuni	1044	ST-658	2	10	2	4	19	3	6	84	27	25	B167-230720-01.fasta	TRUE	2020-07-23T00:00:00Z	Dudelange	6361	0.939944	49	9		21-B167	0.999456	346243	9		aspA,glnA,gltA,glyA,pgm,tkt,uncA,porA,fn_gyrA	100	100	492.041	2	10	2	4	19	3	6	25	27	1	0	9	1044	B167___2___10___2___4___19___3___6___25___27	9MLST match
B190-130820-01	B190	Bird	Turdus	C. jejuni	11	ST-45	48	7	10	4	1	7	1	414	7	217	B190-130820-01.fasta	TRUE	2020-08-13T00:00:00Z	Dudelange	107611	0.060172	318	8	pgm	21-B190	0.996861	404979	9		aspA,glnA,gltA,glyA,pgm,tkt,uncA,porA,fn_gyrA	100	97.8089	455.311	48	7	10	4	183	7	1	217	7	4	6	3	3727	B190___48___7___10___4___183___7___1___217___7	partial match
B194-200820-01	B194	Bird	Alopochen aegyptiacus	C. jejuni	8614	ST-1332	2	1	4	28	58	672	58	2612	36	6	B194-200820-01.fasta	TRUE	2020-08-20T00:00:00Z	Wasserbillig	80888	0.997147	178	9		21-B194	0.999873	4634237	9		aspA,glnA,gltA,glyA,pgm,tkt,uncA,porA,fn_gyrA	100	100	492.184	2	1	4	28	58	672	58	6	36	1	0	9	8614	B194___2___1___4___28___58___672___58___6___36	9MLST match
B203-270820-04	B203	Bird	Corvus corone	C. jejuni	677	ST-677 complex	10	81	50	99	120	76	52	36	19	276	B203-270820-04.fasta	TRUE	2020-08-27T00:00:00Z	Dudelange	59177	0.01485	103	9		21-B203	0.999788	64309	9		aspA,glnA,gltA,glyA,pgm,tkt,uncA,porA,fn_gyrA	100	92.12	343.227	10	81	50	99	120	76	52	276	19	5	0	9	677	B203___10___81___50___99___120___76___52___276___19	9MLST match
B203-270820-01	B203	Bird	Corvus corone	C. jejuni	11385	?	4	43	9	5	8	46	21	3163	80	203	B203-270820-01.fasta	TRUE	2020-08-27T00:00:00Z	Dudelange	111042	0.738868	208	9		21-B203	0.998772	4154178	9		aspA,glnA,gltA,glyA,pgm,tkt,uncA,porA,fn_gyrA	100	100	496.177	4	43	9	5	8	46	21	203	80	1	0	9	11385	B203___4___43___9___5___8___46___21___203___80	9MLST match
B203-270820-02	B203	Bird	Corvus corone	C. jejuni	11381	?	577	2	397	91	884	748	51	3164	109	2368	B203-270820-02.fasta	TRUE	2020-08-27T00:00:00Z	Dudelange	NA	NA	NA	0	aspA,glnA,gltA,glyA,pgm,tkt,uncA,porA,fn_gyrA	NA	NA	NA	NA	NA	NA	NA	NA	NA	NA	NA	NA	NA	NA	NA	NA	NA	NA	NA	NA	NA	NA	NA	false negative
B221-240920-01	B221	Bird	Alopochen aegyptiacus	C. jejuni	1294	?	2	59	96	48	131	24	57	2460	13	152	B221-240920-01.fasta	TRUE	2020-09-24T00:00:00Z	Wasserbillig	107539	0.790849	260	9		21-B221	0.998558	2224645	9		aspA,glnA,gltA,glyA,pgm,tkt,uncA,porA,fn_gyrA	100	100	492.158	2	59	96	48	131	24	57	152	13	1	0	9	1294	B221___2___59___96___48___131___24___57___152___13	9MLST match
B300-140421-01	B300	Bird	Sylvia atricapilla	C. jejuni	1080	?	10	2	107	137	120	76	1	3169	74	130	B300-140421-01.fasta	TRUE	2021-04-14T00:00:00Z	Uerbersyren	42536	0.804606	308	9		B300	0.993806	4805983	9		aspA,glnA,gltA,glyA,pgm,tkt,uncA,porA,fn_gyrA	100	100	491.961	10	2	107	137	120	76	1	130	74	1	0	9	1080	B300___10___2___107___137___120___76___1___130___74	9MLST match
B318-050521-01	B318	Bird	Asio otus	C. jejuni	45	ST-45 complex	4	7	10	4	1	7	1	2042	7	49	B318-050521-01.fasta	TRUE	2021-05-05T00:00:00Z	Dudelange	107526	0.416722	87	8	porA	B318	0.996902	3342502	8	porA	aspA,glnA,gltA,glyA,pgm,tkt,uncA,fn_gyrA	100	100	474.91	4	7	10	4	1	7	1	180	7	1	0	8	45	B318___4___7___10___4___1___7___1___180___7	partial match
B320-050521-02	B320	Bird	Pica pica	C. jejuni	4570	?	64	22	20	100	242	204	16	3170	37	1795	B320-050521-02.fasta	TRUE	2021-05-05T00:00:00Z	Dudelange	NA	NA	NA	6	gltA,porA,fn_gyrA	NA	NA	NA	NA	NA	NA	NA	NA	NA	NA	NA	NA	NA	NA	NA	NA	NA	NA	NA	NA	NA	NA	NA	false negative
B321-050521-01	B321	Bird	Pica pica	C. jejuni	11383	?	64	33	78	18	1136	86	16	3171	11	1598	B321-050521-01.fasta	TRUE	2021-05-05T00:00:00Z	Dudelange	111040	0.904683	642	9		B321	0.999795	124503	9		aspA,glnA,gltA,glyA,pgm,tkt,uncA,porA,fn_gyrA	100	100	495.783	64	33	78	18	1136	86	16	1598	11	1	0	9	11383	B321___64___33___78___18___1136___86___16___1598___11	9MLST match
B325-250521-01	B325	Bird	Corvus monedula	C. jejuni	563	ST-177 complex	17	5	8	5	8	2	4	3172	31	909	B325-250521-01.fasta	TRUE	2021-05-25T00:00:00Z	Dudelange	42534	0.459294	116	8	porA	B325	0.996091	2023478	8	porA	aspA,glnA,gltA,glyA,pgm,tkt,uncA,fn_gyrA	100	100	474.376	17	5	8	5	8	2	4	2648	31	1	0	8	563	B325___17___5___8___5___8___2___4___2648___31	partial match
B326-250521-01	B326	Bird	Corvus monedula	C. jejuni	4570	?	64	22	20	100	242	204	16	3170	37	1795	B326-250521-01.fasta	TRUE	2021-05-25T00:00:00Z	Dudelange	NA	NA	NA	6	gltA,porA,fn_gyrA	NA	NA	NA	NA	NA	NA	NA	NA	NA	NA	NA	NA	NA	NA	NA	NA	NA	NA	NA	NA	NA	NA	NA	false negative
B327-250521-01	B327	Bird	Corvus corone	C. jejuni	11382	?	80	70	164	98	123	229	16	3173	31	1468	B327-250521-01.fasta	TRUE	2021-05-25T00:00:00Z	Dudelange	111039	0.9968	641	9		B327	0.999788	3235964	9		aspA,glnA,gltA,glyA,pgm,tkt,uncA,porA,fn_gyrA	100	100	496.491	80	70	164	98	123	229	16	1468	31	1	0	9	11382	B327___80___70___164___98___123___229___16___1468___31	9MLST match
B328-250521-02	B328	Bird	Corvus corone	C. jejuni	6386	?	64	95	20	100	514	301	60	3174	36	406	B328-250521-02.fasta	TRUE	2021-05-25T00:00:00Z	Dudelange	NA	NA	NA	6	tkt,porA,fn_gyrA	NA	NA	NA	NA	NA	NA	NA	NA	NA	NA	NA	NA	NA	NA	NA	NA	NA	NA	NA	NA	NA	NA	NA	false negative
B329-250521-01	B329	Bird	Turdus	C. jejuni	677	ST-677 complex	10	81	50	99	120	76	52	36	19	276	B329-250521-01.fasta	TRUE	2021-05-25T00:00:00Z	Dudelange	59177	0.949539	103	9		B329	0.999958	8307703	9		aspA,glnA,gltA,glyA,pgm,tkt,uncA,porA,fn_gyrA	100	100	492.175	10	81	50	99	120	76	52	276	19	1	0	9	677	B329___10___81___50___99___120___76___52___276___19	9MLST match
B330-250521-01	B330	Bird	Sturnus	C. jejuni	677	ST-677 complex	10	81	50	99	120	76	52	2070	19	276	B330-250521-01.fasta	TRUE	2021-05-25T00:00:00Z	Dudelange	59177	1	103	9		B330	0.999915	8877424	9		aspA,glnA,gltA,glyA,pgm,tkt,uncA,porA,fn_gyrA	100	100	492.276	10	81	50	99	120	76	52	276	19	1	0	9	677	B330___10___81___50___99___120___76___52___276___19	9MLST match
B331-250521-01	B331	Bird	Parus major	C. jejuni	45	ST-45 complex	4	7	10	4	1	7	1	297	7	49	B331-250521-01.fasta	TRUE	2021-05-25T00:00:00Z	Dudelange	42785	0.051486	87	7	porA,fn_gyrA	B331	0.997707	585665	8	porA	aspA,glnA,gltA,glyA,pgm,tkt,uncA,fn_gyrA	99.9562	94.6325	486.298	4	7	10	4	1	7	1	3204	30	3	6	2	45	B331___4___7___10___4___1___7___1___3204___30	partial match
B335-070621-01	B335	Bird	Corvus monedula	C. jejuni	11584	?	64	22	20	189	134	94	16	3258	11	2372	B335-070621-01.fasta	TRUE	2021-06-07T00:00:00Z	Dudelange	NA	NA	NA	5	gltA,glyA,tkt,porA	NA	NA	NA	NA	NA	NA	NA	NA	NA	NA	NA	NA	NA	NA	NA	NA	NA	NA	NA	NA	NA	NA	NA	false negative
B336-070621-02	B336	Bird	Corvus monedula	C. jejuni	1481	?	35	5	9	5	8	2	2	3177	31	1836	B336-070621-02.fasta	TRUE	2021-06-07T00:00:00Z	Dudelange	NA	NA	NA	4	aspA,glnA,gltA,uncA,porA	NA	NA	NA	NA	NA	NA	NA	NA	NA	NA	NA	NA	NA	NA	NA	NA	NA	NA	NA	NA	NA	NA	NA	false negative
B336-070621-01	B336	Bird	Corvus monedula	C. jejuni	11379	?	64	226	203	189	652	54	16	3176	11	2367	B336-070621-01.fasta	TRUE	2021-06-07T00:00:00Z	Dudelange	NA	NA	NA	4	glnA,gltA,glyA,pgm,porA	NA	NA	NA	NA	NA	NA	NA	NA	NA	NA	NA	NA	NA	NA	NA	NA	NA	NA	NA	NA	NA	NA	NA	false negative
B337-070621-01	B337	Bird	Pica pica	C. jejuni	1044	ST-658 complex	2	10	2	4	19	3	6	84	27	25	B337-070621-01.fasta	TRUE	2021-06-07T00:00:00Z	Dudelange	6361	0.732703	49	9		B337	0.999873	1676056	9		aspA,glnA,gltA,glyA,pgm,tkt,uncA,porA,fn_gyrA	100	100	491.033	2	10	2	4	19	3	6	25	27	1	0	9	1044	B337___2___10___2___4___19___3___6___25___27	9MLST match
B338-070621-02	B338	Bird	Corvus monedula	C. jejuni	11379	?	64	226	203	189	652	54	16	3178	11	2367	B338-070621-02.fasta	TRUE	2021-06-07T00:00:00Z	Dudelange	NA	NA	NA	4	glnA,gltA,glyA,pgm,porA	NA	NA	NA	NA	NA	NA	NA	NA	NA	NA	NA	NA	NA	NA	NA	NA	NA	NA	NA	NA	NA	NA	NA	false negative
B339-070621-01	B339	Bird	Corvus corone	C. jejuni	267	ST-283 complex	4	7	40	4	42	51	1	1407	1	73	B339-070621-01.fasta	TRUE	2021-06-07T00:00:00Z	Dudelange	79262	0.973796	52	9		B339	0.99983	3232186	9		aspA,glnA,gltA,glyA,pgm,tkt,uncA,porA,fn_gyrA	100	100	489.226	4	7	40	4	42	51	1	73	1	1	0	9	267	B339___4___7___40___4___42___51___1___73___1	9MLST match
B342-070621-01	B342	Bird	Dendocopos	C. jejuni	19	ST-21 complex	2	1	5	3	2	1	5	82	8	7	B342-070621-01.fasta	TRUE	2021-06-07T00:00:00Z	Dudelange	5889	0.123115	34	9		B342	1	644213	9		aspA,glnA,gltA,glyA,pgm,tkt,uncA,porA,fn_gyrA	100	97.1067	416.427	2	1	5	3	2	1	5	7	8	2	1	8	19	B342___2___1___5___3___2___1___5___7___8	9MLST match
B345-080621-01	B345	Bird	Prunella modularis	C. jejuni	383	ST-283 complex	4	7	12	4	42	51	1	251	1	73	B345-080621-01.fasta	TRUE	2021-06-07T00:00:00Z	Uerbersyren	30778	0.544261	52	9		B345	0.999619	3153635	9		aspA,glnA,gltA,glyA,pgm,tkt,uncA,porA,fn_gyrA	100	100	488.814	4	7	12	4	42	51	1	73	1	1	0	9	383	B345___4___7___12___4___42___51___1___73___1	9MLST match
B353-210621-01	B353	Bird	Corvus monedula	C. jejuni	448	?	61	70	22	18	2	74	47	2506	31	639	B353-210621-01.fasta	TRUE	2021-06-21T00:00:00Z	Dudelange	46554	0.567468	781	8	porA	B353	0.992078	1103776	8	porA	aspA,glnA,gltA,glyA,pgm,tkt,uncA,fn_gyrA	100	100	474.686	61	70	22	18	2	74	47	451	31	1	0	8	448	B353___61___70___22___18___2___74___47___451___31	partial match
B354-210621-01	B354	Bird	Garrulus	C. jejuni	2162	?	35	43	8	51	8	2	21	3179	7	634	B354-210621-01.fasta	TRUE	2021-06-21T00:00:00Z	Dudelange	62524	0.9029	365	8	fn_gyrA	B354	0.99903	995509	9		aspA,glnA,gltA,glyA,pgm,tkt,uncA,porA,fn_gyrA	100	95.6989	450.26	35	43	8	51	8	2	21	634	31	1	0	9	2162	B354___35___43___8___51___8___2___21___634___31	partial match
B355-210621-01	B355	Bird	Fringilla	C. jejuni	267	ST-283 complex	4	7	40	4	42	51	1	2744	1	73	B355-210621-01.fasta	TRUE	2021-06-21T00:00:00Z	Dudelange	79262	0.92416	52	9		B355	0.999703	4929073	9		aspA,glnA,gltA,glyA,pgm,tkt,uncA,porA,fn_gyrA	100	100	489.28	4	7	40	4	42	51	1	73	1	1	0	9	267	B355___4___7___40___4___42___51___1___73___1	9MLST match
B357-210621-01	B357	Bird	Corvus monedula	C. jejuni	11378	?	35	5	8	51	8	2	21	3180	7	1621	B357-210621-01.fasta	TRUE	2021-06-21T00:00:00Z	Dudelange	111035	0.859262	365	9		B357	0.998828	233548	9		aspA,glnA,gltA,glyA,pgm,tkt,uncA,porA,fn_gyrA	100	100	491.806	35	5	8	51	8	2	21	1621	7	1	0	9	11378	B357___35___5___8___51___8___2___21___1621___7	9MLST match
B358-210621-01	B358	Bird	Turdus	C. jejuni	11	ST-45 complex	48	7	10	4	1	7	1	3181	7	217	B358-210621-01.fasta	TRUE	2021-06-21T00:00:00Z	Dudelange	42542	0.325696	28	7	aspA,porA	B358	0.999618	4250671	9		aspA,glnA,gltA,glyA,pgm,tkt,uncA,porA,fn_gyrA	100	100	491.99	4	7	10	4	1	7	1	44	7	1	0	9	45	B358___4___7___10___4___1___7___1___44___7	partial match
B361-210621-01	B361	Bird	Turdus	C. jejuni	230	ST-45 complex	4	7	41	4	42	7	1	2282	1	217	B361-210621-01.fasta	TRUE	2021-06-21T00:00:00Z	Dudelange	48452	0.69439	52	9		B361	0.999958	4704782	9		aspA,glnA,gltA,glyA,pgm,tkt,uncA,porA,fn_gyrA	100	100	492.275	4	7	41	4	42	7	1	217	1	1	0	9	230	B361___4___7___41___4___42___7___1___217___1	9MLST match
B362-210621-01	B362	Bird	Turdus	C. jejuni	267	ST-283 complex	4	7	40	4	42	51	1	2744	1	73	B362-210621-01.fasta	TRUE	2021-06-21T00:00:00Z	Dudelange	79262	0.823138	52	9		B362	0.999915	2911212	9		aspA,glnA,gltA,glyA,pgm,tkt,uncA,porA,fn_gyrA	100	100	489.138	4	7	40	4	42	51	1	73	1	1	0	9	267	B362___4___7___40___4___42___51___1___73___1	9MLST match
B364-210621-01	B364	Bird	Pica pica	C. jejuni	11380	?	18	33	72	98	116	871	6	3182	11	200	B364-210621-01.fasta	TRUE	2021-06-21T00:00:00Z	Dudelange	111037	0.992454	639	9		B364	1	778619	9		aspA,glnA,gltA,glyA,pgm,tkt,uncA,porA,fn_gyrA	100	100	493.74	18	33	72	98	116	871	6	200	11	1	0	9	11380	B364___18___33___72___98___116___871___6___200___11	9MLST match
W021-240919-01	W021	Surface water	Moselle	C. jejuni	704	?	2	29	4	27	10	25	57	2604	13	886	W021-240919-01.fasta	TRUE	2019-09-12T00:00:00Z	Moselle (Wasserbillig)	78951	0.772429	226	9		21-W021	0.998676	102585	9		aspA,glnA,gltA,glyA,pgm,tkt,uncA,porA,fn_gyrA	100	100	489.188	2	29	4	27	10	25	57	886	13	1	0	9	704	W021___2___29___4___27___10___25___57___886___13	9MLST match
W052-240920-02	W052	Surface water	Sûre	C. jejuni	991	ST-692 complex	37	52	57	26	107	29	23	2620	4	6	W052-240920-02.fasta	TRUE	2020-09-24T00:00:00Z	Sûre (Wasserbillig)	111595	0.242358	108	8	pgm	W052	0.999958	575151	7	glnA,gltA	aspA,glyA,pgm,tkt,uncA,porA,fn_gyrA	100	99.57	493.887	37	52	57	26	129	29	23	6	4	2	2	5	699	W052___37___52___57___26___129___29___23___6___4	partial match
W087-210621-01	W087	Surface water	Alzette	C. jejuni	10102	?	64	22	203	100	134	160	60	3184	11	2366	W087-210621-01.fasta	TRUE	2021-06-21T00:00:00Z	Alzette Hesperange Amont step	33939	0.023654	727	7	glnA,glyA	W087	0.999322	53405	7	glnA,glyA	aspA,gltA,pgm,tkt,uncA,porA,fn_gyrA	100	87.7486	367.564	64	133	203	142	134	160	60	2366	11	4	4	3	7811	W087___64___133___203___142___134___160___60___2366___11	partial match
B025-070519-02	B025	Bird	Corvus corone	C. jejuni	677	ST-677 complex	10	81	50	99	120	76	52	942	19	276	B025-070519-02.fasta	TRUE	2019-05-07T00:00:00Z	Dudelange	NA	NA	NA	NA	NA	NA	NA	NA	NA	NA	NA	NA	NA	NA	NA	NA	NA	NA	NA	NA	NA	NA	NA	NA	NA	NA	NA	NA	false negative
B027-070519-01	B027	Bird	Pica pica	C. jejuni	45	ST-45 complex	4	7	10	4	1	7	1	2155	7	49	B027-070519-01.fasta	TRUE	2019-05-07T00:00:00Z	Dudelange	NA	NA	NA	NA	NA	NA	NA	NA	NA	NA	NA	NA	NA	NA	NA	NA	NA	NA	NA	NA	NA	NA	NA	NA	NA	NA	NA	NA	false negative
B114-130819-01	B114	Bird	Turdus	C. jejuni	10810	?	94	117	90	125	1094	147	100	2173	101	2355	B114-130819-01.fasta	TRUE	2019-08-13T00:00:00Z	Dudelange	NA	NA	NA	NA	NA	NA	NA	NA	NA	NA	NA	NA	NA	NA	NA	NA	NA	NA	NA	NA	NA	NA	NA	NA	NA	NA	NA	NA	false negative
B114-130819-03	B114	Bird	Turdus	C. jejuni	1277	?	96	135	99	136	183	140	113	2600	105	2359	B114-130819-03.fasta	TRUE	2019-08-13T00:00:00Z	Dudelange	NA	NA	NA	NA	NA	NA	NA	NA	NA	NA	NA	NA	NA	NA	NA	NA	NA	NA	NA	NA	NA	NA	NA	NA	NA	NA	NA	NA	false negative
B119-270819-01	B119	Bird	Pica pica	C. jejuni	11004	?	15	33	72	875	753	103	16	2601	106	1772	B119-270819-01.fasta	TRUE	2019-08-27T00:00:00Z	Dudelange	NA	NA	NA	NA	NA	NA	NA	NA	NA	NA	NA	NA	NA	NA	NA	NA	NA	NA	NA	NA	NA	NA	NA	NA	NA	NA	NA	NA	false negative
B189-130820-01	B189	Bird	Turdus	C. jejuni	8614	ST-1332	2	1	4	28	58	672	58	2612	36	6	B189-130820-01.fasta	TRUE	2020-08-13T00:00:00Z	Dudelange	NA	NA	NA	NA	NA	NA	NA	NA	NA	NA	NA	NA	NA	NA	NA	NA	NA	NA	NA	NA	NA	NA	NA	NA	NA	NA	NA	NA	false negative
B193-200820-02	B193	Bird	Anas	C. jejuni	5207	NA	37	187	4	28	19	24	23	2614	51	2356	B193-200820-02.fasta	TRUE	2020-08-20T00:00:00Z	Wasserbillig	NA	NA	NA	NA	NA	NA	NA	NA	NA	NA	NA	NA	NA	NA	NA	NA	NA	NA	NA	NA	NA	NA	NA	NA	NA	NA	NA	NA	false negative
B198-200820-01	B198	Bird	Alopochen aegyptiacus	C. jejuni	11	ST-45	48	7	10	4	1	7	1	414	7	217	B198-200820-01.fasta	TRUE	2020-08-20T00:00:00Z	Wasserbillig	NA	NA	NA	NA	NA	NA	NA	NA	NA	NA	NA	NA	NA	NA	NA	NA	NA	NA	NA	NA	NA	NA	NA	NA	NA	NA	NA	NA	false negative
B250-060321-01	B250	Bird	Emberiza citrinella	C. jejuni	11376	?	578	143	116	151	198	189	33	3165	108	2370	B250-060321-01.fasta	TRUE	2021-03-06T00:00:00Z	Uerbersyren	NA	NA	NA	NA	NA	NA	NA	NA	NA	NA	NA	NA	NA	NA	NA	NA	NA	NA	NA	NA	NA	NA	NA	NA	NA	NA	NA	NA	false negative
B251-060321-01	B251	Bird	Emberiza citrinella	C. jejuni	11376	?	578	143	116	151	198	189	33	3165	108	2370	B251-060321-01.fasta	TRUE	2021-03-06T00:00:00Z	Uerbersyren	NA	NA	NA	NA	NA	NA	NA	NA	NA	NA	NA	NA	NA	NA	NA	NA	NA	NA	NA	NA	NA	NA	NA	NA	NA	NA	NA	NA	false negative
B266-270321-01	B266	Bird	Sylvia atricapilla	C. jejuni	6313	?	323	439	384	483	611	512	371	3166	107	2369	B266-270321-01.fasta	TRUE	2021-03-27T00:00:00Z	Uerbersyren	NA	NA	NA	NA	NA	NA	NA	NA	NA	NA	NA	NA	NA	NA	NA	NA	NA	NA	NA	NA	NA	NA	NA	NA	NA	NA	NA	NA	false negative
B284-140421-02	B284	Bird	Sylvia atricapilla	C. jejuni	11413	?	95	795	671	892	1137	872	717	3257	22	2371	B284-140421-02.fasta	TRUE	2021-04-14T00:00:00Z	Uerbersyren	NA	NA	NA	NA	NA	NA	NA	NA	NA	NA	NA	NA	NA	NA	NA	NA	NA	NA	NA	NA	NA	NA	NA	NA	NA	NA	NA	NA	false negative
B285-140421-02	B285	Bird	Sylvia atricapilla	C. jejuni	1316	?	95	2	94	127	181	144	110	3167	74	463	B285-140421-02.fasta	TRUE	2021-04-14T00:00:00Z	Uerbersyren	NA	NA	NA	NA	NA	NA	NA	NA	NA	NA	NA	NA	NA	NA	NA	NA	NA	NA	NA	NA	NA	NA	NA	NA	NA	NA	NA	NA	false negative
B288-140421-02	B288	Bird	Sylvia atricapilla	C. jejuni	6313	?	323	439	384	483	611	512	371	3168	107	2369	B288-140421-02.fasta	TRUE	2021-04-14T00:00:00Z	Uerbersyren	NA	NA	NA	NA	NA	NA	NA	NA	NA	NA	NA	NA	NA	NA	NA	NA	NA	NA	NA	NA	NA	NA	NA	NA	NA	NA	NA	NA	false negative
B299-140421-01	B299	Bird	Sylvia atricapilla	C. jejuni	6313	?	323	439	384	483	611	512	371	3168	107	2369	B299-140421-01.fasta	TRUE	2021-04-14T00:00:00Z	Uerbersyren	NA	NA	NA	NA	NA	NA	NA	NA	NA	NA	NA	NA	NA	NA	NA	NA	NA	NA	NA	NA	NA	NA	NA	NA	NA	NA	NA	NA	false negative
B302-140421-01	B302	Bird	Sylvia atricapilla	C. jejuni	6313	?	323	439	384	483	611	512	371	3168	107	2369	B302-140421-01.fasta	TRUE	2021-04-14T00:00:00Z	Uerbersyren	NA	NA	NA	NA	NA	NA	NA	NA	NA	NA	NA	NA	NA	NA	NA	NA	NA	NA	NA	NA	NA	NA	NA	NA	NA	NA	NA	NA	false negative
B303-140421-01	B303	Bird	Emberiza citrinella	C. jejuni	11376	?	578	143	116	151	198	189	33	3165	108	2370	B303-140421-01.fasta	TRUE	2021-04-14T00:00:00Z	Uerbersyren	NA	NA	NA	NA	NA	NA	NA	NA	NA	NA	NA	NA	NA	NA	NA	NA	NA	NA	NA	NA	NA	NA	NA	NA	NA	NA	NA	NA	false negative
B308-140421-01	B308	Bird	Emberiza citrinella	C. jejuni	11376	?	578	143	116	151	198	189	33	3165	108	2370	B308-140421-01.fasta	TRUE	2021-04-14T00:00:00Z	Uerbersyren	NA	NA	NA	NA	NA	NA	NA	NA	NA	NA	NA	NA	NA	NA	NA	NA	NA	NA	NA	NA	NA	NA	NA	NA	NA	NA	NA	NA	false negative
B333-250521-01	B333	Bird	Turdus	C. jejuni	11377	?	98	122	98	891	180	150	113	3175	101	970	B333-250521-01.fasta	TRUE	2021-05-25T00:00:00Z	Dudelange	NA	NA	NA	NA	NA	NA	NA	NA	NA	NA	NA	NA	NA	NA	NA	NA	NA	NA	NA	NA	NA	NA	NA	NA	NA	NA	NA	NA	false negative
W025-02122019-02	W025	Surface water	Alzette	C. jejuni	11466	?	18	33	649	325	116	104	6	2278	100	2349	W025-02122019-02.fasta	TRUE	2019-12-02T00:00:00Z	Alzette Hesperange Amont step	NA	NA	NA	NA	NA	NA	NA	NA	NA	NA	NA	NA	NA	NA	NA	NA	NA	NA	NA	NA	NA	NA	NA	NA	NA	NA	NA	NA	false negative
NA	B025	NA	NA	NA	NA	NA	NA	NA	NA	NA	NA	NA	NA	NA	NA	NA	NA	NA	NA	NA	57462	0.895449	101	NA	NA	B25	0.999368	719006	9		aspA,glnA,gltA,glyA,pgm,tkt,uncA,porA,fn_gyrA	100	100	493.452	4	7	10	4	1	7	1	49	7	1	0	9	45	B025___4___7___10___4___1___7___1___49___7	additional strain
NA	B027	NA	NA	NA	NA	NA	NA	NA	NA	NA	NA	NA	NA	NA	NA	NA	NA	NA	NA	NA	59177	0.842249	103	NA	NA	21-B027	0.999958	4842611	9		aspA,glnA,gltA,glyA,pgm,tkt,uncA,porA,fn_gyrA	100	100	491.975	10	81	50	99	120	76	52	276	19	1	0	9	677	B027___10___81___50___99___120___76___52___276___19	additional strain
NA	B027	NA	NA	NA	NA	NA	NA	NA	NA	NA	NA	NA	NA	NA	NA	NA	NA	NA	NA	NA	48448	0.151705	788	NA	NA	21-B027	0.999915	642920	8	aspA	glnA,gltA,glyA,pgm,tkt,uncA,porA,fn_gyrA	100	100	484.21	18	100	82	24	138	116	63	2358	31	2	0	8	951	B027___18___100___82___24___138___116___63___2358___31	additional strain
NA	B028	NA	NA	NA	NA	NA	NA	NA	NA	NA	NA	NA	NA	NA	NA	NA	NA	NA	NA	NA	48448	0.719608	788	NA	NA	B028	1	6521825	9		aspA,glnA,gltA,glyA,pgm,tkt,uncA,porA,fn_gyrA	100	100	494.346	18	100	82	24	138	116	63	2358	31	1	0	9	951	B028___18___100___82___24___138___116___63___2358___31	additional strain
NA	B035	NA	NA	NA	NA	NA	NA	NA	NA	NA	NA	NA	NA	NA	NA	NA	NA	NA	NA	NA	33960	0.410093	733	NA	NA	21-B035	0.999831	947400	9		aspA,glnA,gltA,glyA,pgm,tkt,uncA,porA,fn_gyrA	100	100	490.447	64	22	85	98	652	270	60	4439	380	1	0	9	7831	B035___64___22___85___98___652___270___60___4439___380	additional strain
NA	B035	NA	NA	NA	NA	NA	NA	NA	NA	NA	NA	NA	NA	NA	NA	NA	NA	NA	NA	NA	78916	0.124838	909	NA	NA	21-B035	0.999958	550647	9		aspA,glnA,gltA,glyA,pgm,tkt,uncA,porA,fn_gyrA	100	97.0667	472.602	64	95	20	100	514	101	60	1157	11	2	2	7	6427	B035___64___95___20___100___514___101___60___1157___11	additional strain
NA	B035	NA	NA	NA	NA	NA	NA	NA	NA	NA	NA	NA	NA	NA	NA	NA	NA	NA	NA	NA	33945	0.066163	729	NA	NA	21-B035	0.997503	713975	6	glnA,tkt,porA	aspA,gltA,glyA,pgm,uncA,fn_gyrA	100	100	470.972	64	89	20	98	134	593	16	2532	11	3	4	2	7813	B035___64___89___20___98___134___593___16___2532___11	additional strain
NA	B035	NA	NA	NA	NA	NA	NA	NA	NA	NA	NA	NA	NA	NA	NA	NA	NA	NA	NA	NA	108833	0.019503	418	NA	NA	21-B035	0.995176	14057	5	glnA,tkt,porA,fn_gyrA	aspA,gltA,glyA,pgm,uncA	100	90.232	286.75	258	174	207	193	336	314	131	2347	99	11	0	5	11002	B035___258___174___207___193___336___314___131___2347___99	additional strain
NA	B035	NA	NA	NA	NA	NA	NA	NA	NA	NA	NA	NA	NA	NA	NA	NA	NA	NA	NA	NA	33954	0.012389	731	NA	NA	21-B035	0.995937	21056	5	glnA,gltA,pgm,tkt	aspA,glyA,uncA,porA,fn_gyrA	100	99.07	422.481	258	174	474	193	753	595	131	4437	298	15	3	2	7825	B035___258___174___474___193___753___595___131___4437___298	additional strain
NA	B036	NA	NA	NA	NA	NA	NA	NA	NA	NA	NA	NA	NA	NA	NA	NA	NA	NA	NA	NA	33965	0.056603	418	NA	NA	B036	0.999576	295978	9		aspA,glnA,gltA,glyA,pgm,tkt,uncA,porA,fn_gyrA	100	99.5089	455.086	258	174	207	193	336	314	229	2347	99	4	0	9	7836	B036___258___174___207___193___336___314___229___2347___99	additional strain
NA	B036	NA	NA	NA	NA	NA	NA	NA	NA	NA	NA	NA	NA	NA	NA	NA	NA	NA	NA	NA	77328	0.051216	271	NA	NA	B036	0.996991	1111265	6	pgm,porA,fn_gyrA	aspA,glnA,gltA,glyA,tkt,uncA	99.95	86.4883	290.331	64	22	77	97	122	301	16	406	384	5	1	5	9407	B036___64___22___77___97___122___301___16___406___384	additional strain
NA	B036	NA	NA	NA	NA	NA	NA	NA	NA	NA	NA	NA	NA	NA	NA	NA	NA	NA	NA	NA	43659	0.043714	776	NA	NA	B036	0.997754	1688441	8	glyA	aspA,glnA,gltA,pgm,tkt,uncA,porA,fn_gyrA	100	100	464.541	64	22	85	98	134	54	16	579	11	6	3	5	2753	B036___64___22___85___98___134___54___16___579___11	additional strain
NA	B036	NA	NA	NA	NA	NA	NA	NA	NA	NA	NA	NA	NA	NA	NA	NA	NA	NA	NA	NA	10778	0.027743	416	NA	NA	B036	0.997373	1448258	5	glnA,gltA,tkt,porA	aspA,glyA,pgm,uncA,fn_gyrA	100	100	488.766	64	89	319	100	94	103	16	1224	11	10	3	2	4835	B036___64___89___319___100___94___103___16___1224___11	additional strain
NA	B037	NA	NA	NA	NA	NA	NA	NA	NA	NA	NA	NA	NA	NA	NA	NA	NA	NA	NA	NA	78916	0.221621	909	NA	NA	B037	0.999279	640141	9		aspA,glnA,gltA,glyA,pgm,tkt,uncA,porA,fn_gyrA	100	99.8067	472.456	64	95	20	100	514	101	60	1157	11	1	0	9	6427	B037___64___95___20___100___514___101___60___1157___11	additional strain
NA	B037	NA	NA	NA	NA	NA	NA	NA	NA	NA	NA	NA	NA	NA	NA	NA	NA	NA	NA	NA	33933	0.050617	725	NA	NA	B037	0.997624	1025884	8	gltA	aspA,glnA,glyA,pgm,tkt,uncA,porA,fn_gyrA	100	98.8388	490.899	64	22	85	98	134	101	16	2367	11	3	3	5	7805	B037___64___22___85___98___134___101___16___2367___11	additional strain
NA	B037	NA	NA	NA	NA	NA	NA	NA	NA	NA	NA	NA	NA	NA	NA	NA	NA	NA	NA	NA	78910	0.041182	907	NA	NA	B037	0.996606	1000871	8	porA	aspA,glnA,gltA,glyA,pgm,tkt,uncA,fn_gyrA	100	95.3875	426.07	64	133	20	100	134	160	16	3122	11	5	6	2	6390	B037___64___133___20___100___134___160___16___3122___11	additional strain
NA	B037	NA	NA	NA	NA	NA	NA	NA	NA	NA	NA	NA	NA	NA	NA	NA	NA	NA	NA	NA	107332	0.036986	570	NA	NA	B037	0.996649	901756	6	glnA,gltA,porA	aspA,glyA,pgm,tkt,uncA,fn_gyrA	100	100	464.794	64	105	85	98	652	54	60	4462	11	7	4	2	8816	B037___64___105___85___98___652___54___60___4462___11	additional strain
NA	B037	NA	NA	NA	NA	NA	NA	NA	NA	NA	NA	NA	NA	NA	NA	NA	NA	NA	NA	NA	34080	0.030123	743	NA	NA	B037	0.99563	372972	7	tkt,porA	aspA,glnA,gltA,glyA,pgm,uncA,fn_gyrA	99.9657	96.4157	392.703	64	22	71	100	134	187	60	2535	152	14	5	2	7851	B037___64___22___71___100___134___187___60___2535___152	additional strain
NA	B038	NA	NA	NA	NA	NA	NA	NA	NA	NA	NA	NA	NA	NA	NA	NA	NA	NA	NA	NA	16124	0.18257	328	NA	NA	21-B038	0.997543	827032	7	porA,fn_gyrA	aspA,glnA,gltA,glyA,pgm,tkt,uncA	100	97.9757	455.067	64	81	111	143	134	153	16	1544	60	1	0	7	3534	B038___64___81___111___143___134___153___16___1544___60	additional strain
NA	B038	NA	NA	NA	NA	NA	NA	NA	NA	NA	NA	NA	NA	NA	NA	NA	NA	NA	NA	NA	32917	0.165938	721	NA	NA	21-B038	0.992883	1164537	5	gltA,pgm,porA,fn_gyrA	aspA,glnA,glyA,tkt,uncA	100	100	450.06	64	33	22	100	122	17	16	1705	145	2	2	3	8343	B038___64___33___22___100___122___17___16___1705___145	additional strain
NA	B038	NA	NA	NA	NA	NA	NA	NA	NA	NA	NA	NA	NA	NA	NA	NA	NA	NA	NA	NA	78887	0.031244	901	NA	NA	21-B038	0.992247	1485976	6	gltA,glyA,porA	aspA,glnA,pgm,tkt,uncA,fn_gyrA	100	100	477.378	64	33	22	98	94	17	16	1705	11	9	4	2	6460	B038___64___33___22___98___94___17___16___1705___11	additional strain
NA	B038	NA	NA	NA	NA	NA	NA	NA	NA	NA	NA	NA	NA	NA	NA	NA	NA	NA	NA	NA	59338	0.025788	480	NA	NA	21-B038	0.993179	726702	5	aspA,pgm,tkt,porA	glnA,gltA,glyA,uncA,fn_gyrA	100	97.712	456.375	277	22	20	143	123	54	16	348	11	10	3	2	8754	B038___277___22___20___143___123___54___16___348___11	additional strain
NA	B039	NA	NA	NA	NA	NA	NA	NA	NA	NA	NA	NA	NA	NA	NA	NA	NA	NA	NA	NA	22260	0.030302	685	NA	NA	21-B039	0.996007	2844560	7	tkt,porA	aspA,glnA,gltA,glyA,pgm,uncA,fn_gyrA	100	98.07	439.709	64	22	212	100	134	233	16	1157	11	2	4	3	2491	B039___64___22___212___100___134___233___16___1157___11	additional strain
NA	B039	NA	NA	NA	NA	NA	NA	NA	NA	NA	NA	NA	NA	NA	NA	NA	NA	NA	NA	NA	33933	0.023439	725	NA	NA	21-B039	0.994903	2258104	7	gltA,porA	aspA,glnA,glyA,pgm,tkt,uncA,fn_gyrA	100	89.8786	363.572	64	22	85	98	134	101	16	2367	11	3	5	2	7805	B039___64___22___85___98___134___101___16___2367___11	additional strain
NA	B039	NA	NA	NA	NA	NA	NA	NA	NA	NA	NA	NA	NA	NA	NA	NA	NA	NA	NA	NA	108833	0.017365	418	NA	NA	21-B039	0.993714	127372	5	gltA,pgm,tkt,fn_gyrA	aspA,glnA,glyA,uncA,porA	100	99.462	478.615	258	174	207	193	336	314	131	2347	99	4	0	5	11002	B039___258___174___207___193___336___314___131___2347___99	additional strain
NA	B039	NA	NA	NA	NA	NA	NA	NA	NA	NA	NA	NA	NA	NA	NA	NA	NA	NA	NA	NA	34080	0.013034	743	NA	NA	21-B039	0.995455	1761844	7	tkt,porA	aspA,glnA,gltA,glyA,pgm,uncA,fn_gyrA	99.9514	93.53	535.903	64	22	71	100	134	187	60	2535	152	6	4	3	7851	B039___64___22___71___100___134___187___60___2535___152	additional strain
NA	B050	NA	NA	NA	NA	NA	NA	NA	NA	NA	NA	NA	NA	NA	NA	NA	NA	NA	NA	NA	33966	0.084263	271	NA	NA	B050	0.992788	1992067	4	gltA,glyA,pgm,tkt,porA	aspA,glnA,uncA,fn_gyrA	99.9125	89.365	360.513	64	22	212	97	122	301	16	4466	384	2	0	4	7837	B050___64___22___212___97___122___301___16___4466___384	additional strain
NA	B050	NA	NA	NA	NA	NA	NA	NA	NA	NA	NA	NA	NA	NA	NA	NA	NA	NA	NA	NA	78898	0.082533	902	NA	NA	B050	0.992025	1991767	5	gltA,glyA,pgm,porA	aspA,glnA,tkt,uncA,fn_gyrA	100	85.056	400.791	64	95	77	98	134	94	16	2372	11	3	2	3	6590	B050___64___95___77___98___134___94___16___2372___11	additional strain
NA	B050	NA	NA	NA	NA	NA	NA	NA	NA	NA	NA	NA	NA	NA	NA	NA	NA	NA	NA	NA	34080	0.066575	743	NA	NA	B050	0.991898	2575057	4	gltA,pgm,uncA,porA,fn_gyrA	aspA,glnA,glyA,tkt	100	100	477.448	64	22	71	100	134	187	60	2535	152	4	2	2	7851	B050___64___22___71___100___134___187___60___2535___152	additional strain
NA	B050	NA	NA	NA	NA	NA	NA	NA	NA	NA	NA	NA	NA	NA	NA	NA	NA	NA	NA	NA	34078	0.027317	742	NA	NA	B050	0.991304	2650459	7	pgm,porA	aspA,glnA,gltA,glyA,tkt,uncA,fn_gyrA	99.9614	88.6	324.99	64	22	68	100	134	593	518	498	11	11	4	3	7893	B050___64___22___68___100___134___593___518___498___11	additional strain
NA	B050	NA	NA	NA	NA	NA	NA	NA	NA	NA	NA	NA	NA	NA	NA	NA	NA	NA	NA	NA	33954	0.021502	731	NA	NA	B050	0.991176	108518	5	gltA,pgm,tkt,porA	aspA,glnA,glyA,uncA,fn_gyrA	100	90.406	309.539	258	174	474	193	753	595	131	4437	298	16	0	5	7825	B050___258___174___474___193___753___595___131___4437___298	additional strain
NA	B051	NA	NA	NA	NA	NA	NA	NA	NA	NA	NA	NA	NA	NA	NA	NA	NA	NA	NA	NA	48453	0.445597	328	NA	NA	21-B051	0.997965	565334	6	gltA,porA,fn_gyrA	aspA,glnA,glyA,pgm,tkt,uncA	100	100	482.93	18	81	111	143	134	153	16	406	60	1	0	6	1309	B051___18___81___111___143___134___153___16___406___60	additional strain
NA	B051	NA	NA	NA	NA	NA	NA	NA	NA	NA	NA	NA	NA	NA	NA	NA	NA	NA	NA	NA	16380	0.258038	676	NA	NA	21-B051	0.999703	399563	8	porA	aspA,glnA,gltA,glyA,pgm,tkt,uncA,fn_gyrA	100	97.5362	464.049	64	105	20	287	94	103	16	1096	11	2	2	6	2401	B051___64___105___20___287___94___103___16___1096___11	additional strain
NA	B051	NA	NA	NA	NA	NA	NA	NA	NA	NA	NA	NA	NA	NA	NA	NA	NA	NA	NA	NA	69254	0.038097	873	NA	NA	21-B051	0.996524	466481	9		aspA,glnA,gltA,glyA,pgm,tkt,uncA,porA,fn_gyrA	100	99.3356	490.219	64	105	20	77	94	103	16	1634	11	3	7	2	6591	B051___64___105___20___77___94___103___16___1634___11	additional strain
NA	B052	NA	NA	NA	NA	NA	NA	NA	NA	NA	NA	NA	NA	NA	NA	NA	NA	NA	NA	NA	33933	0.087615	725	NA	NA	21-B052	0.998262	1900600	8	gltA	aspA,glnA,glyA,pgm,tkt,uncA,porA,fn_gyrA	100	96.3512	463.086	64	22	85	98	134	101	16	2367	11	1	0	8	7805	B052___64___22___85___98___134___101___16___2367___11	additional strain
NA	B052	NA	NA	NA	NA	NA	NA	NA	NA	NA	NA	NA	NA	NA	NA	NA	NA	NA	NA	NA	78916	0.086861	909	NA	NA	21-B052	0.999491	1038261	9		aspA,glnA,gltA,glyA,pgm,tkt,uncA,porA,fn_gyrA	100	97.3967	454.316	64	95	20	100	514	101	60	1157	11	2	3	6	6427	B052___64___95___20___100___514___101___60___1157___11	additional strain
NA	B052	NA	NA	NA	NA	NA	NA	NA	NA	NA	NA	NA	NA	NA	NA	NA	NA	NA	NA	NA	43659	0.082453	776	NA	NA	21-B052	0.997286	1913972	8	gltA	aspA,glnA,glyA,pgm,tkt,uncA,porA,fn_gyrA	100	96.3512	461.163	64	22	85	98	134	54	16	579	11	3	6	2	2753	B052___64___22___85___98___134___54___16___579___11	additional strain
NA	B052	NA	NA	NA	NA	NA	NA	NA	NA	NA	NA	NA	NA	NA	NA	NA	NA	NA	NA	NA	33939	0.073162	727	NA	NA	21-B052	0.996396	1375832	6	glnA,glyA,porA	aspA,gltA,pgm,tkt,uncA,fn_gyrA	100	94.6617	401.063	64	133	203	142	134	160	60	2366	11	4	4	2	7811	B052___64___133___203___142___134___160___60___2366___11	additional strain
NA	B052	NA	NA	NA	NA	NA	NA	NA	NA	NA	NA	NA	NA	NA	NA	NA	NA	NA	NA	NA	16380	0.032721	676	NA	NA	21-B052	0.995421	1160137	6	glyA,tkt,porA	aspA,glnA,gltA,pgm,uncA,fn_gyrA	100	95.3183	432.968	64	105	20	287	94	103	16	1096	11	10	4	2	2401	B052___64___105___20___287___94___103___16___1096___11	additional strain
NA	B052	NA	NA	NA	NA	NA	NA	NA	NA	NA	NA	NA	NA	NA	NA	NA	NA	NA	NA	NA	33966	0.020258	271	NA	NA	21-B052	0.995463	1022316	5	glyA,pgm,porA,fn_gyrA	aspA,glnA,gltA,tkt,uncA	100	97.472	361.964	64	22	212	97	122	301	16	4466	384	17	3	2	7837	B052___64___22___212___97___122___301___16___4466___384	additional strain
NA	B054	NA	NA	NA	NA	NA	NA	NA	NA	NA	NA	NA	NA	NA	NA	NA	NA	NA	NA	NA	34069	0.891888	738	NA	NA	B054	1	5892726	9		aspA,glnA,gltA,glyA,pgm,tkt,uncA,porA,fn_gyrA	100	100	493.643	64	583	22	111	122	303	16	2357	36	1	0	9	7882	B054___64___583___22___111___122___303___16___2357___36	additional strain
NA	B063	NA	NA	NA	NA	NA	NA	NA	NA	NA	NA	NA	NA	NA	NA	NA	NA	NA	NA	NA	IN_Cj_FI_143_innuendo	0.28756	52	NA	NA	21-B063	0.999745	3654386	9		aspA,glnA,gltA,glyA,pgm,tkt,uncA,porA,fn_gyrA	100	100	488.284	4	7	10	4	42	51	1	44	1	1	0	9	583	B063___4___7___10___4___42___51___1___44___1	additional strain
NA	B063	NA	NA	NA	NA	NA	NA	NA	NA	NA	NA	NA	NA	NA	NA	NA	NA	NA	NA	NA	61375	0.168113	28	NA	NA	21-B063	0.999406	3859892	9		aspA,glnA,gltA,glyA,pgm,tkt,uncA,porA,fn_gyrA	99.9556	94.4789	532.441	4	7	10	4	1	7	300	44	7	2	6	3	4529	B063___4___7___10___4___1___7___300___44___7	additional strain
NA	B067	NA	NA	NA	NA	NA	NA	NA	NA	NA	NA	NA	NA	NA	NA	NA	NA	NA	NA	NA	42536	0.606473	308	NA	NA	21-B067	0.997069	5382798	9		aspA,glnA,gltA,glyA,pgm,tkt,uncA,porA,fn_gyrA	100	100	491.499	10	2	107	137	120	76	1	130	74	1	0	9	1080	B067___10___2___107___137___120___76___1___130___74	additional strain
NA	B068	NA	NA	NA	NA	NA	NA	NA	NA	NA	NA	NA	NA	NA	NA	NA	NA	NA	NA	NA	85135	0.032083	101	NA	NA	21-B068	0.99754	2278418	7	gltA,porA	aspA,glnA,glyA,pgm,tkt,uncA,fn_gyrA	100	94.7029	426.795	4	7	667	4	1	7	1	49	7	4	5	2	11224	B068___4___7___667___4___1___7___1___49___7	additional strain
NA	B076	NA	NA	NA	NA	NA	NA	NA	NA	NA	NA	NA	NA	NA	NA	NA	NA	NA	NA	NA	30778	0.872746	52	NA	NA	21-B076	0.999576	4999472	9		aspA,glnA,gltA,glyA,pgm,tkt,uncA,porA,fn_gyrA	100	100	489.292	4	7	12	4	42	51	1	73	1	1	0	9	383	B076___4___7___12___4___42___51___1___73___1	additional strain
NA	B077	NA	NA	NA	NA	NA	NA	NA	NA	NA	NA	NA	NA	NA	NA	NA	NA	NA	NA	NA	30778	0.873023	52	NA	NA	21-B077	0.999533	5658226	9		aspA,glnA,gltA,glyA,pgm,tkt,uncA,porA,fn_gyrA	100	100	489.358	4	7	12	4	42	51	1	73	1	1	0	9	383	B077___4___7___12___4___42___51___1___73___1	additional strain
NA	B078	NA	NA	NA	NA	NA	NA	NA	NA	NA	NA	NA	NA	NA	NA	NA	NA	NA	NA	NA	30778	0.81878	52	NA	NA	21-B078	0.999576	3360253	9		aspA,glnA,gltA,glyA,pgm,tkt,uncA,porA,fn_gyrA	100	100	489.22	4	7	12	4	42	51	1	73	1	1	0	9	383	B078___4___7___12___4___42___51___1___73___1	additional strain
NA	B080	NA	NA	NA	NA	NA	NA	NA	NA	NA	NA	NA	NA	NA	NA	NA	NA	NA	NA	NA	30778	0.850511	52	NA	NA	21-B080	0.999533	3207222	9		aspA,glnA,gltA,glyA,pgm,tkt,uncA,porA,fn_gyrA	100	100	489.236	4	7	12	4	42	51	1	73	1	1	0	9	383	B080___4___7___12___4___42___51___1___73___1	additional strain
NA	B082	NA	NA	NA	NA	NA	NA	NA	NA	NA	NA	NA	NA	NA	NA	NA	NA	NA	NA	NA	30778	0.868056	52	NA	NA	21-B082	0.999533	1798330	9		aspA,glnA,gltA,glyA,pgm,tkt,uncA,porA,fn_gyrA	100	100	489.381	4	7	12	4	42	51	1	73	1	1	0	9	383	B082___4___7___12___4___42___51___1___73___1	additional strain
NA	B103	NA	NA	NA	NA	NA	NA	NA	NA	NA	NA	NA	NA	NA	NA	NA	NA	NA	NA	NA	30778	0.859738	52	NA	NA	21-B103	0.999745	3072627	9		aspA,glnA,gltA,glyA,pgm,tkt,uncA,porA,fn_gyrA	100	100	489.268	4	7	12	4	42	51	1	73	1	1	0	9	383	B103___4___7___12___4___42___51___1___73___1	additional strain
NA	B155	NA	NA	NA	NA	NA	NA	NA	NA	NA	NA	NA	NA	NA	NA	NA	NA	NA	NA	NA	81867	0.266912	293	NA	NA	21-B155	0.996356	2652263	7	pgm,porA	aspA,glnA,gltA,glyA,tkt,uncA,fn_gyrA	100	100	470.89	37	52	57	26	129	29	23	3232	4	1	0	7	699	B155___37___52___57___26___129___29___23___3232___4	additional strain
NA	B158	NA	NA	NA	NA	NA	NA	NA	NA	NA	NA	NA	NA	NA	NA	NA	NA	NA	NA	NA	107149	0.642609	398	NA	NA	21-B158	0.994759	1178546	6	gltA,pgm,tkt	aspA,glnA,glyA,uncA,porA,fn_gyrA	100	100	518.433	76	105	284	104	43	269	31	858	40	1	0	6	5479	B158___76___105___284___104___43___269___31___858___40	additional strain
NA	B189	NA	NA	NA	NA	NA	NA	NA	NA	NA	NA	NA	NA	NA	NA	NA	NA	NA	NA	NA	107474	0.534383	318	NA	NA	B189	0.992864	10731339	9		aspA,glnA,gltA,glyA,pgm,tkt,uncA,porA,fn_gyrA	100	100	488.214	48	7	10	4	1	7	1	217	7	1	0	9	11	B189___48___7___10___4___1___7___1___217___7	additional strain
NA	B190	NA	NA	NA	NA	NA	NA	NA	NA	NA	NA	NA	NA	NA	NA	NA	NA	NA	NA	NA	16111	0.071459	78	NA	NA	21-B190	0.995758	261314	7	aspA,porA	glnA,gltA,glyA,pgm,tkt,uncA,fn_gyrA	100	97.1829	437.125	4	7	10	4	1	7	1	231	7	3	0	7	45	B190___4___7___10___4___1___7___1___231___7	additional strain
NA	B198	NA	NA	NA	NA	NA	NA	NA	NA	NA	NA	NA	NA	NA	NA	NA	NA	NA	NA	NA	80888	0.997538	178	NA	NA	21-B198	0.999915	2522676	9		aspA,glnA,gltA,glyA,pgm,tkt,uncA,porA,fn_gyrA	100	100	492.2	2	1	4	28	58	672	58	6	36	1	0	9	8614	B198___2___1___4___28___58___672___58___6___36	additional strain
NA	B320	NA	NA	NA	NA	NA	NA	NA	NA	NA	NA	NA	NA	NA	NA	NA	NA	NA	NA	NA	78909	0.731748	359	NA	NA	B320	0.994611	1449378	7	gltA,porA	aspA,glnA,glyA,pgm,tkt,uncA,fn_gyrA	99.9486	93.5771	417.467	64	22	22	100	242	204	16	4468	11	1	0	7	1539	B320___64___22___22___100___242___204___16___4468___11	additional strain
NA	B325	NA	NA	NA	NA	NA	NA	NA	NA	NA	NA	NA	NA	NA	NA	NA	NA	NA	NA	NA	107173	0.152945	399	NA	NA	B325	0.995198	1889364	9		aspA,glnA,gltA,glyA,pgm,tkt,uncA,porA,fn_gyrA	100	93.6633	430.57	17	2	8	5	8	2	4	909	7	2	7	2	177	B325___17___2___8___5___8___2___4___909___7	additional strain
NA	B326	NA	NA	NA	NA	NA	NA	NA	NA	NA	NA	NA	NA	NA	NA	NA	NA	NA	NA	NA	111040	0.420843	642	NA	NA	B326	0.999789	1443315	9		aspA,glnA,gltA,glyA,pgm,tkt,uncA,porA,fn_gyrA	100	100	494.367	64	33	78	18	1136	86	16	1598	11	1	0	9	11383	B326___64___33___78___18___1136___86___16___1598___11	additional strain
NA	B326	NA	NA	NA	NA	NA	NA	NA	NA	NA	NA	NA	NA	NA	NA	NA	NA	NA	NA	NA	78909	0.266283	359	NA	NA	B326	0.997758	1021068	8	porA	aspA,glnA,gltA,glyA,pgm,tkt,uncA,fn_gyrA	100	99.1287	464.414	64	22	22	100	242	204	16	4468	11	2	3	5	1539	B326___64___22___22___100___242___204___16___4468___11	additional strain
NA	B326	NA	NA	NA	NA	NA	NA	NA	NA	NA	NA	NA	NA	NA	NA	NA	NA	NA	NA	NA	46554	0.083635	781	NA	NA	B326	0.996828	273155	8	porA	aspA,glnA,gltA,glyA,pgm,tkt,uncA,fn_gyrA	100	98.1188	431.183	61	70	22	18	2	74	47	451	31	3	2	6	448	B326___61___70___22___18___2___74___47___451___31	additional strain
NA	B328	NA	NA	NA	NA	NA	NA	NA	NA	NA	NA	NA	NA	NA	NA	NA	NA	NA	NA	NA	78916	0.268921	909	NA	NA	B328	0.991763	396007	6	tkt,porA,fn_gyrA	aspA,glnA,gltA,glyA,pgm,uncA	100	100	471.742	64	95	20	100	514	101	60	1157	11	1	0	6	6427	B328___64___95___20___100___514___101___60___1157___11	additional strain
NA	B328	NA	NA	NA	NA	NA	NA	NA	NA	NA	NA	NA	NA	NA	NA	NA	NA	NA	NA	NA	34077	0.218933	271	NA	NA	B328	0.990961	222996	4	gltA,glyA,pgm,uncA,fn_gyrA	aspA,glnA,tkt,porA	100	89.7275	420.339	64	22	212	97	122	301	16	406	384	2	1	3	7837	B328___64___22___212___97___122___301___16___406___384	additional strain
NA	B331	NA	NA	NA	NA	NA	NA	NA	NA	NA	NA	NA	NA	NA	NA	NA	NA	NA	NA	NA	59177	0.768185	103	NA	NA	B331	0.999915	4855265	9		aspA,glnA,gltA,glyA,pgm,tkt,uncA,porA,fn_gyrA	100	100	491.782	10	81	50	99	120	76	52	276	19	1	0	9	677	B331___10___81___50___99___120___76___52___276___19	additional strain
NA	B331	NA	NA	NA	NA	NA	NA	NA	NA	NA	NA	NA	NA	NA	NA	NA	NA	NA	NA	NA	48452	0.079073	52	NA	NA	B331	0.998089	457452	6	gltA,pgm,fn_gyrA	aspA,glnA,glyA,tkt,uncA,porA	100	100	489.733	4	7	41	4	42	7	1	217	1	2	0	6	230	B331___4___7___41___4___42___7___1___217___1	additional strain
NA	B335	NA	NA	NA	NA	NA	NA	NA	NA	NA	NA	NA	NA	NA	NA	NA	NA	NA	NA	NA	59179	0.160983	842	NA	NA	B335	0.999831	592650	7	tkt,porA	aspA,glnA,gltA,glyA,pgm,uncA,fn_gyrA	100	100	472.704	64	467	71	100	134	101	16	2846	11	1	0	7	6592	B335___64___467___71___100___134___101___16___2846___11	additional strain
NA	B335	NA	NA	NA	NA	NA	NA	NA	NA	NA	NA	NA	NA	NA	NA	NA	NA	NA	NA	NA	111040	0.096506	642	NA	NA	B335	1	501980	9		aspA,glnA,gltA,glyA,pgm,tkt,uncA,porA,fn_gyrA	100	97.0122	482.831	64	33	78	18	1136	86	16	1598	11	2	3	6	11383	B335___64___33___78___18___1136___86___16___1598___11	additional strain
NA	B335	NA	NA	NA	NA	NA	NA	NA	NA	NA	NA	NA	NA	NA	NA	NA	NA	NA	NA	NA	33933	0.064081	725	NA	NA	B335	0.998434	641422	6	gltA,glyA,tkt	aspA,glnA,pgm,uncA,porA,fn_gyrA	100	100	509.588	64	22	85	98	134	101	16	2367	11	3	4	2	7805	B335___64___22___85___98___134___101___16___2367___11	additional strain
NA	B335	NA	NA	NA	NA	NA	NA	NA	NA	NA	NA	NA	NA	NA	NA	NA	NA	NA	NA	NA	48446	0.056927	359	NA	NA	B335	0.999153	685240	8	gltA	aspA,glnA,glyA,pgm,tkt,uncA,porA,fn_gyrA	100	100	501.61	64	22	22	100	134	160	16	1795	11	4	6	2	8510	B335___64___22___22___100___134___160___16___1795___11	additional strain
NA	B335	NA	NA	NA	NA	NA	NA	NA	NA	NA	NA	NA	NA	NA	NA	NA	NA	NA	NA	NA	33945	0.05558	729	NA	NA	B335	0.997968	583980	6	glyA,tkt,porA	aspA,glnA,gltA,pgm,uncA,fn_gyrA	100	93.3267	436.585	64	89	20	98	134	593	16	2532	11	5	4	2	7813	B335___64___89___20___98___134___593___16___2532___11	additional strain
NA	B335	NA	NA	NA	NA	NA	NA	NA	NA	NA	NA	NA	NA	NA	NA	NA	NA	NA	NA	NA	33966	0.013603	271	NA	NA	B335	0.996995	429747	6	glyA,porA,fn_gyrA	aspA,glnA,gltA,pgm,tkt,uncA	100	88.5317	416.384	64	22	212	97	122	301	16	4466	384	22	4	2	7837	B335___64___22___212___97___122___301___16___4466___384	additional strain
NA	B336	NA	NA	NA	NA	NA	NA	NA	NA	NA	NA	NA	NA	NA	NA	NA	NA	NA	NA	NA	107176	0.113187	400	NA	NA	B336	0.996822	348812	5	aspA,glnA,gltA,porA	glyA,pgm,tkt,uncA,fn_gyrA	100	97.792	408.028	17	2	8	5	8	2	21	204	31	1	0	5	144	B336___17___2___8___5___8___2___21___204___31	additional strain
NA	B336	NA	NA	NA	NA	NA	NA	NA	NA	NA	NA	NA	NA	NA	NA	NA	NA	NA	NA	NA	43659	0.106139	776	NA	NA	B336	0.997585	947901	6	gltA,glyA,porA	aspA,glnA,pgm,tkt,uncA,fn_gyrA	100	100	465.821	64	22	85	98	134	54	16	579	11	2	0	6	2753	B336___64___22___85___98___134___54___16___579___11	additional strain
NA	B336	NA	NA	NA	NA	NA	NA	NA	NA	NA	NA	NA	NA	NA	NA	NA	NA	NA	NA	NA	50477	0.103711	480	NA	NA	B336	0.999873	798093	8	gltA	aspA,glnA,glyA,pgm,tkt,uncA,porA,fn_gyrA	100	97.8512	481.925	277	105	20	143	134	54	16	348	11	3	4	4	6451	B336___277___105___20___143___134___54___16___348___11	additional strain
NA	B336	NA	NA	NA	NA	NA	NA	NA	NA	NA	NA	NA	NA	NA	NA	NA	NA	NA	NA	NA	111035	0.050032	365	NA	NA	B336	0.995381	378114	5	gltA,glyA,porA,fn_gyrA	aspA,glnA,pgm,tkt,uncA	100	97.792	402.209	35	5	8	51	8	2	21	1621	7	6	3	2	11378	B336___35___5___8___51___8___2___21___1621___7	additional strain
NA	B336	NA	NA	NA	NA	NA	NA	NA	NA	NA	NA	NA	NA	NA	NA	NA	NA	NA	NA	NA	107381	0.033973	572	NA	NA	B336	0.996144	549891	7	glyA,uncA	aspA,glnA,gltA,pgm,tkt,porA,fn_gyrA	100	95.5071	410.071	76	22	212	614	134	54	560	348	11	9	5	2	8808	B336___76___22___212___614___134___54___560___348___11	additional strain
NA	B336	NA	NA	NA	NA	NA	NA	NA	NA	NA	NA	NA	NA	NA	NA	NA	NA	NA	NA	NA	42069	0.022953	359	NA	NA	B336	0.996356	750632	7	glyA,porA	aspA,glnA,gltA,pgm,tkt,uncA,fn_gyrA	100	95.7714	382.824	64	22	22	100	134	103	16	4468	11	13	5	2	7872	B336___64___22___22___100___134___103___16___4468___11	additional strain
NA	B336	NA	NA	NA	NA	NA	NA	NA	NA	NA	NA	NA	NA	NA	NA	NA	NA	NA	NA	NA	34071	0.010653	739	NA	NA	B336	0.99394	19099	4	gltA,pgm,tkt,porA,fn_gyrA	aspA,glnA,glyA,uncA	100	99.655	339.182	258	174	497	193	574	615	131	4467	385	27	0	4	7889	B336___258___174___497___193___574___615___131___4467___385	additional strain
NA	B337	NA	NA	NA	NA	NA	NA	NA	NA	NA	NA	NA	NA	NA	NA	NA	NA	NA	NA	NA	111040	0.083052	642	NA	NA	B337	1	118670	8	pgm	aspA,glnA,gltA,glyA,tkt,uncA,porA,fn_gyrA	100	92.9213	422.276	64	33	78	18	1136	86	16	1598	11	2	0	8	11383	B337___64___33___78___18___1136___86___16___1598___11	additional strain
NA	B337	NA	NA	NA	NA	NA	NA	NA	NA	NA	NA	NA	NA	NA	NA	NA	NA	NA	NA	NA	50656	0.038279	481	NA	NA	B337	0.999958	68658	9		aspA,glnA,gltA,glyA,pgm,tkt,uncA,porA,fn_gyrA	100	97.8644	396.998	27	22	22	104	115	86	31	680	39	3	1	8	8368	B337___27___22___22___104___115___86___31___680___39	additional strain
NA	B338	NA	NA	NA	NA	NA	NA	NA	NA	NA	NA	NA	NA	NA	NA	NA	NA	NA	NA	NA	111040	0.212916	642	NA	NA	B338	0.999831	1534667	9		aspA,glnA,gltA,glyA,pgm,tkt,uncA,porA,fn_gyrA	100	100	489.99	64	33	78	18	1136	86	16	1598	11	1	0	9	11383	B338___64___33___78___18___1136___86___16___1598___11	additional strain
NA	B338	NA	NA	NA	NA	NA	NA	NA	NA	NA	NA	NA	NA	NA	NA	NA	NA	NA	NA	NA	43659	0.107817	776	NA	NA	B338	0.998432	1458192	9		aspA,glnA,gltA,glyA,pgm,tkt,uncA,porA,fn_gyrA	100	93.45	417.711	64	22	85	98	134	54	16	579	11	2	3	6	2753	B338___64___22___85___98___134___54___16___579___11	additional strain
NA	B338	NA	NA	NA	NA	NA	NA	NA	NA	NA	NA	NA	NA	NA	NA	NA	NA	NA	NA	NA	34068	0.078925	737	NA	NA	B338	0.998221	1451952	7	tkt,porA	aspA,glnA,gltA,glyA,pgm,uncA,fn_gyrA	100	96.4057	380.353	64	89	85	189	134	101	16	4440	11	4	5	2	7839	B338___64___89___85___189___134___101___16___4440___11	additional strain
NA	B342	NA	NA	NA	NA	NA	NA	NA	NA	NA	NA	NA	NA	NA	NA	NA	NA	NA	NA	NA	34524	0.858769	30	NA	NA	B342	1	4077625	8	pgm	aspA,glnA,gltA,glyA,tkt,uncA,porA,fn_gyrA	100	100	491.138	8	10	2	2	11	12	6	957	8	1	0	8	354	B342___8___10___2___2___11___12___6___957___8	additional strain
NA	B345	NA	NA	NA	NA	NA	NA	NA	NA	NA	NA	NA	NA	NA	NA	NA	NA	NA	NA	NA	42534	0.138199	116	NA	NA	B345	0.99572	718014	8	porA	aspA,glnA,gltA,glyA,pgm,tkt,uncA,fn_gyrA	100	100	463.271	17	5	8	5	8	2	4	2648	31	2	0	8	563	B345___17___5___8___5___8___2___4___2648___31	additional strain
NA	B345	NA	NA	NA	NA	NA	NA	NA	NA	NA	NA	NA	NA	NA	NA	NA	NA	NA	NA	NA	107173	0.050975	399	NA	NA	B345	0.994533	768706	8	glnA	aspA,gltA,glyA,pgm,tkt,uncA,porA,fn_gyrA	100	97.6562	434.382	17	2	8	5	8	2	4	909	7	4	6	2	177	B345___17___2___8___5___8___2___4___909___7	additional strain
NA	B354	NA	NA	NA	NA	NA	NA	NA	NA	NA	NA	NA	NA	NA	NA	NA	NA	NA	NA	NA	59177	0.05649	103	NA	NA	B354	0.999536	24510	9		aspA,glnA,gltA,glyA,pgm,tkt,uncA,porA,fn_gyrA	100	86.5667	406.264	10	81	50	99	120	76	52	276	19	2	0	9	677	B354___10___81___50___99___120___76___52___276___19	additional strain
NA	B355	NA	NA	NA	NA	NA	NA	NA	NA	NA	NA	NA	NA	NA	NA	NA	NA	NA	NA	NA	62524	0.035241	365	NA	NA	B355	0.999193	110069	9		aspA,glnA,gltA,glyA,pgm,tkt,uncA,porA,fn_gyrA	100	97.8589	384.095	35	43	8	51	8	2	21	634	31	2	0	9	2162	B355___35___43___8___51___8___2___21___634___31	additional strain
NA	B358	NA	NA	NA	NA	NA	NA	NA	NA	NA	NA	NA	NA	NA	NA	NA	NA	NA	NA	NA	107933	0.160344	52	NA	NA	B358	0.999873	2366560	8	fn_gyrA	aspA,glnA,gltA,glyA,pgm,tkt,uncA,porA	100	98.845	480.084	4	7	40	4	42	51	1	73	288	2	5	3	267	B358___4___7___40___4___42___51___1___73___288	additional strain
NA	B362	NA	NA	NA	NA	NA	NA	NA	NA	NA	NA	NA	NA	NA	NA	NA	NA	NA	NA	NA	59177	0.100886	103	NA	NA	B362	0.999958	200254	9		aspA,glnA,gltA,glyA,pgm,tkt,uncA,porA,fn_gyrA	100	99.89	461.054	10	81	50	99	120	76	52	276	19	2	0	9	677	B362___10___81___50___99___120___76___52___276___19	additional strain
NA	W022	NA	NA	NA	NA	NA	NA	NA	NA	NA	NA	NA	NA	NA	NA	NA	NA	NA	NA	NA	42540	0.436166	208	NA	NA	W022	0.998388	2627421	9		aspA,glnA,gltA,glyA,pgm,tkt,uncA,porA,fn_gyrA	100	100	489.149	35	43	9	5	121	46	21	468	80	1	0	9	683	W022___35___43___9___5___121___46___21___468___80	additional strain
NA	W022	NA	NA	NA	NA	NA	NA	NA	NA	NA	NA	NA	NA	NA	NA	NA	NA	NA	NA	NA	94139	0.025682	997	NA	NA	W022	0.990118	282618	5	gltA,pgm,porA,fn_gyrA	aspA,glnA,glyA,tkt,uncA	99.944	87.018	161.294	4	7	10	5	2	7	1	11	10	6	2	3	11044	W022___4___7___10___5___2___7___1___11___10	additional strain
NA	W026	NA	NA	NA	NA	NA	NA	NA	NA	NA	NA	NA	NA	NA	NA	NA	NA	NA	NA	NA	81867	0.180736	293	NA	NA	W026	0.998644	268300	7	pgm,porA	aspA,glnA,gltA,glyA,tkt,uncA,fn_gyrA	100	100	462.65	37	52	57	26	129	29	23	3232	4	1	0	7	699	W026___37___52___57___26___129___29___23___3232___4	additional strain
NA	W026	NA	NA	NA	NA	NA	NA	NA	NA	NA	NA	NA	NA	NA	NA	NA	NA	NA	NA	NA	80498	0.125004	367	NA	NA	W026	0.998474	190915	7	glyA,porA	aspA,glnA,gltA,pgm,tkt,uncA,fn_gyrA	100	97.1929	419.861	37	52	4	131	127	29	23	180	13	2	5	2	5874	W026___37___52___4___131___127___29___23___180___13	additional strain
NA	W026	NA	NA	NA	NA	NA	NA	NA	NA	NA	NA	NA	NA	NA	NA	NA	NA	NA	NA	NA	78944	0.045313	190	NA	NA	W026	0.999364	64594	8	glyA	aspA,glnA,gltA,pgm,tkt,uncA,porA,fn_gyrA	100	83.3838	341.233	2	29	4	48	13	24	57	819	13	5	2	6	693	W026___2___29___4___48___13___24___57___819___13	additional strain
NA	W052	NA	NA	NA	NA	NA	NA	NA	NA	NA	NA	NA	NA	NA	NA	NA	NA	NA	NA	NA	107502	0.683546	411	NA	NA	W052	0.99966	2135215	9		aspA,glnA,gltA,glyA,pgm,tkt,uncA,porA,fn_gyrA	100	100	486.29	2	29	84	48	131	25	57	188	4	1	0	9	996	W052___2___29___84___48___131___25___57___188___4	additional strain
NA	W053	NA	NA	NA	NA	NA	NA	NA	NA	NA	NA	NA	NA	NA	NA	NA	NA	NA	NA	NA	100884	0.112551	116	NA	NA	W053	0.999584	60475	8	porA	aspA,glnA,gltA,glyA,pgm,tkt,uncA,fn_gyrA	100	100	426.081	17	2	8	5	8	2	4	4123	31	1	0	8	177	W053___17___2___8___5___8___2___4___4123___31	additional strain
NA	W053	NA	NA	NA	NA	NA	NA	NA	NA	NA	NA	NA	NA	NA	NA	NA	NA	NA	NA	NA	112078	0.07664	431	NA	NA	W053	0.999751	23510	8	aspA	glnA,gltA,glyA,pgm,tkt,uncA,porA,fn_gyrA	100	92.9013	350.66	1	7	10	349	261	7	1	2027	7	4	0	8	3904	W053___1___7___10___349___261___7___1___2027___7	additional strain
NA	W054	NA	NA	NA	NA	NA	NA	NA	NA	NA	NA	NA	NA	NA	NA	NA	NA	NA	NA	NA	42534	0.113165	116	NA	NA	W054	0.999118	37584	8	uncA	aspA,glnA,gltA,glyA,pgm,tkt,porA,fn_gyrA	99.9688	92.81	412.277	17	5	8	5	8	2	4	2648	31	1	0	8	563	W054___17___5___8___5___8___2___4___2648___31	additional strain
NA	W078	NA	NA	NA	NA	NA	NA	NA	NA	NA	NA	NA	NA	NA	NA	NA	NA	NA	NA	NA	57334	0.08903	28	NA	NA	W078	0.998866	79612	9		aspA,glnA,gltA,glyA,pgm,tkt,uncA,porA,fn_gyrA	100	100	435.504	4	7	10	4	1	7	1	217	80	2	0	9	45	W078___4___7___10___4___1___7___1___217___80	additional strain
NA	W079	NA	NA	NA	NA	NA	NA	NA	NA	NA	NA	NA	NA	NA	NA	NA	NA	NA	NA	NA	6083	0.256197	849	NA	NA	W079	0.999873	250667	9		aspA,glnA,gltA,glyA,pgm,tkt,uncA,porA,fn_gyrA	100	100	462.476	64	70	68	97	122	106	16	127	36	1	0	9	801	W079___64___70___68___97___122___106___16___127___36	additional strain
NA	W079	NA	NA	NA	NA	NA	NA	NA	NA	NA	NA	NA	NA	NA	NA	NA	NA	NA	NA	NA	31157	0.095339	716	NA	NA	W079	0.991182	8563	2	glnA,glyA,pgm,tkt,uncA,porA,fn_gyrA	aspA,gltA	100	80.19	525.918	8	2	5	53	11	3	1	940	9	3	0	2	607	W079___8___2___5___53___11___3___1___940___9	additional strain
NA	W079	NA	NA	NA	NA	NA	NA	NA	NA	NA	NA	NA	NA	NA	NA	NA	NA	NA	NA	NA	109829	0.030414	34	NA	NA	W079	1	103065	8	porA	aspA,glnA,gltA,glyA,pgm,tkt,uncA,fn_gyrA	100	98.6375	393.406	2	1	5	3	2	1	5	582	8	9	2	6	19	W079___2___1___5___3___2___1___5___582___8	additional strain
NA	W081	NA	NA	NA	NA	NA	NA	NA	NA	NA	NA	NA	NA	NA	NA	NA	NA	NA	NA	NA	100884	0.196197	116	NA	NA	W081	0.997722	248147	7	gltA,porA	aspA,glnA,glyA,pgm,tkt,uncA,fn_gyrA	100	100	460.528	17	2	8	5	8	2	4	4123	31	1	0	7	177	W081___17___2___8___5___8___2___4___4123___31	additional strain
NA	W081	NA	NA	NA	NA	NA	NA	NA	NA	NA	NA	NA	NA	NA	NA	NA	NA	NA	NA	NA	92360	0.040035	475	NA	NA	W081	0.995992	187034	5	aspA,glyA,tkt,uncA	glnA,gltA,pgm,porA,fn_gyrA	100	100	480.365	35	2	9	432	8	46	21	728	31	8	3	2	5128	W081___35___2___9___432___8___46___21___728___31	additional strain
NA	W082	NA	NA	NA	NA	NA	NA	NA	NA	NA	NA	NA	NA	NA	NA	NA	NA	NA	NA	NA	107526	0.059927	87	NA	NA	W082	0.994945	44795	8	porA	aspA,glnA,gltA,glyA,pgm,tkt,uncA,fn_gyrA	100	100	338.356	4	7	10	4	1	7	1	180	7	7	5	3	45	W082___4___7___10___4___1___7___1___180___7	additional strain
NA	W083	NA	NA	NA	NA	NA	NA	NA	NA	NA	NA	NA	NA	NA	NA	NA	NA	NA	NA	NA	94139	0.035334	997	NA	NA	W083	0.990742	13672	4	gltA,pgm,tkt,porA,fn_gyrA	aspA,glnA,glyA,uncA	100	88.155	227.438	4	7	10	5	2	7	1	11	10	9	0	4	11044	W083___4___7___10___5___2___7___1___11___10	additional strain
NA	W083	NA	NA	NA	NA	NA	NA	NA	NA	NA	NA	NA	NA	NA	NA	NA	NA	NA	NA	NA	107176	0.029898	400	NA	NA	W083	0.99278	28294	7	uncA,porA	aspA,glnA,gltA,glyA,pgm,tkt,fn_gyrA	99.9671	99.5014	300.206	17	2	8	5	8	2	21	204	31	10	2	5	144	W083___17___2___8___5___8___2___21___204___31	additional strain
NA	W083	NA	NA	NA	NA	NA	NA	NA	NA	NA	NA	NA	NA	NA	NA	NA	NA	NA	NA	NA	42085	0.024189	474	NA	NA	W083	0.994564	21781	7	aspA,uncA	glnA,gltA,glyA,pgm,tkt,porA,fn_gyrA	100	88.2143	300.682	27	2	22	104	43	86	31	270	31	14	3	4	1231	W083___27___2___22___104___43___86___31___270___31	additional strain
NA	W083	NA	NA	NA	NA	NA	NA	NA	NA	NA	NA	NA	NA	NA	NA	NA	NA	NA	NA	NA	69254	0.015982	873	NA	NA	W083	0.992355	15404	7	glnA,gltA	aspA,glyA,pgm,tkt,uncA,porA,fn_gyrA	100	90.9486	265.934	64	105	20	77	94	103	16	1634	11	20	4	3	6591	W083___64___105___20___77___94___103___16___1634___11	additional strain
NA	W084	NA	NA	NA	NA	NA	NA	NA	NA	NA	NA	NA	NA	NA	NA	NA	NA	NA	NA	NA	42085	0.221966	474	NA	NA	W084	0.999109	237312	7	aspA,fn_gyrA	glnA,gltA,glyA,pgm,tkt,uncA,porA	100	100	484.422	27	2	22	104	43	86	31	270	31	1	0	7	1231	W084___27___2___22___104___43___86___31___270___31	additional strain
NA	W084	NA	NA	NA	NA	NA	NA	NA	NA	NA	NA	NA	NA	NA	NA	NA	NA	NA	NA	NA	31157	0.063882	716	NA	NA	W084	0.99423	37947	3	aspA,glyA,pgm,tkt,porA,fn_gyrA	glnA,gltA,uncA	100	99.9167	288.476	8	2	5	53	11	3	1	940	9	3	1	2	607	W084___8___2___5___53___11___3___1___940___9	additional strain
NA	W084	NA	NA	NA	NA	NA	NA	NA	NA	NA	NA	NA	NA	NA	NA	NA	NA	NA	NA	NA	94139	0.035222	997	NA	NA	W084	0.996436	13504	5	glnA,glyA,porA,fn_gyrA	aspA,gltA,pgm,tkt,uncA	100	96.16	269.92	4	7	10	5	2	7	1	11	10	10	1	4	11044	W084___4___7___10___5___2___7___1___11___10	additional strain
NA	W084	NA	NA	NA	NA	NA	NA	NA	NA	NA	NA	NA	NA	NA	NA	NA	NA	NA	NA	NA	108911	0.021712	420	NA	NA	W084	0.996394	199224	7	aspA,porA	glnA,gltA,glyA,pgm,tkt,uncA,fn_gyrA	100	94.2629	391.465	18	2	22	104	1	86	31	363	40	15	5	2	4069	W084___18___2___22___104___1___86___31___363___40	additional strain
NA	W084	NA	NA	NA	NA	NA	NA	NA	NA	NA	NA	NA	NA	NA	NA	NA	NA	NA	NA	NA	110948	0.010278	636	NA	NA	W084	0.992915	8695	4	aspA,glnA,glyA,porA,fn_gyrA	gltA,pgm,tkt,uncA	100	94.095	244.182	1	4	5	2	2	1	5	4574	3	23	2	2	299	W084___1___4___5___2___2___1___5___4574___3	additional strain
NA	W087	NA	NA	NA	NA	NA	NA	NA	NA	NA	NA	NA	NA	NA	NA	NA	NA	NA	NA	NA	79262	0.635341	52	NA	NA	W087	1	1387262	9		aspA,glnA,gltA,glyA,pgm,tkt,uncA,porA,fn_gyrA	100	100	488.201	4	7	40	4	42	51	1	73	1	1	0	9	267	W087___4___7___40___4___42___51___1___73___1	additional strain
NA	W087	NA	NA	NA	NA	NA	NA	NA	NA	NA	NA	NA	NA	NA	NA	NA	NA	NA	NA	NA	48446	0.08649	359	NA	NA	W087	0.999364	148719	8	gltA	aspA,glnA,glyA,pgm,tkt,uncA,porA,fn_gyrA	100	92.6637	453.419	64	22	22	100	134	160	16	1795	11	2	1	7	8510	W087___64___22___22___100___134___160___16___1795___11	additional strain
NA	W087	NA	NA	NA	NA	NA	NA	NA	NA	NA	NA	NA	NA	NA	NA	NA	NA	NA	NA	NA	80565	0.017513	923	NA	NA	W087	0.997202	28675	5	aspA,gltA,tkt,porA	glnA,glyA,pgm,uncA,fn_gyrA	100	86.786	268.129	18	89	77	98	138	17	16	1612	36	6	1	4	10035	W087___18___89___77___98___138___17___16___1612___36	additional strain
NA	W087	NA	NA	NA	NA	NA	NA	NA	NA	NA	NA	NA	NA	NA	NA	NA	NA	NA	NA	NA	69254	0.015922	873	NA	NA	W087	0.997795	80114	5	glnA,glyA,tkt,porA	aspA,gltA,pgm,uncA,fn_gyrA	100	100	429.327	64	105	20	77	94	103	16	1634	11	7	3	2	6591	W087___64___105___20___77___94___103___16___1634___11	additional strain
B015-230519-01	B015	Bird	Cygnus	C. jejuni	45	ST-45 complex	4	7	10	4	1	7	1	2052	7	467	B015-230519-01.fasta	TRUE	2019-05-23T00:00:00Z	Dudelange	B015-230519-01	0.930744	222	9		B015	0.99916	11621274	9		aspA,glnA,gltA,glyA,pgm,tkt,uncA,porA,fn_gyrA	100	100	490.637	4	7	10	4	1	7	1	467	7	1	0	9	45	B015___4___7___10___4___1___7___1___467___7	genome match
B021-070519-01	B021	Bird	Corvus corone	C. jejuni	48	ST-48 complex	2	4	1	2	7	1	5	153	3	7	B021-070519-01.fasta	TRUE	2019-05-07T00:00:00Z	Dudelange	B021-070519-01	0.537906	3	9		21-B021	0.999539	1989308	9		aspA,glnA,gltA,glyA,pgm,tkt,uncA,porA,fn_gyrA	100	100	490.924	2	4	1	2	7	1	5	7	3	1	0	9	48	B021___2___4___1___2___7___1___5___7___3	genome match
B023-070519-01	B023	Bird	Corvus corone	C. jejuni	448	?	61	70	22	18	2	74	47	2154	102	2353	B023-070519-01.fasta	TRUE	2019-05-07T00:00:00Z	Dudelange	B023-070519-01	0.9435	486	9		21-B023	0.997484	3317275	9		aspA,glnA,gltA,glyA,pgm,tkt,uncA,porA,fn_gyrA	100	100	496.054	61	70	22	18	2	74	47	2353	102	1	0	9	448	B023___61___70___22___18___2___74___47___2353___102	genome match
B026-230519-01	B026	Bird	Pica pica	C. jejuni	448	?	61	70	22	18	2	74	47	2154	102	2353	B026-230519-01.fasta	TRUE	2019-05-23T00:00:00Z	Dudelange	B023-070519-01	0.933633	486	9		21-B026	0.997571	3082855	9		aspA,glnA,gltA,glyA,pgm,tkt,uncA,porA,fn_gyrA	100	100	496.064	61	70	22	18	2	74	47	2353	102	1	0	9	448	B026___61___70___22___18___2___74___47___2353___102	9MLST match
B028-230519-01	B028	Bird	Corvus corone	C. jejuni	2491	?	64	22	212	100	134	233	16	2156	11	1634	B028-230519-01.fasta	TRUE	2019-05-23T00:00:00Z	Dudelange	B028-230519-01	0.169131	439	9		B028	0.996176	1299225	8	aspA	glnA,gltA,glyA,pgm,tkt,uncA,porA,fn_gyrA	100	98.585	483.84	64	22	212	100	134	233	16	1634	11	2	0	8	2491	B028___64___22___212___100___134___233___16___1634___11	genome match
B029-110619-02	B029	Bird	Pica pica	C. jejuni	448	?	61	70	22	18	2	74	47	2624	31	860	B029-110619-02.fasta	TRUE	2019-06-11T00:00:00Z	Dudelange	B029-110619-02	0.986271	379	9		21-B029	0.999916	3824715	9		aspA,glnA,gltA,glyA,pgm,tkt,uncA,porA,fn_gyrA	100	100	491.909	61	70	22	18	2	74	47	860	31	1	0	9	448	B029___61___70___22___18___2___74___47___860___31	genome match
B036-110619-03	B036	Bird	Corvus monedula	C. jejuni	10813	?	64	22	148	100	94	187	16	2157	11	2351	B036-110619-03.fasta	TRUE	2019-06-11T00:00:00Z	Dudelange	B050-180619-01	0.359466	972	9		B036	1	2454784	9		aspA,glnA,gltA,glyA,pgm,tkt,uncA,porA,fn_gyrA	100	100	488.792	64	22	148	100	94	187	16	2351	11	1	0	9	10813	B036___64___22___148___100___94___187___16___2351___11	9MLST match
B036-110619-01	B036	Bird	Corvus monedula	C. jejuni	1540	ST-1275 complex	76	33	22	104	43	109	31	2157	40	860	B036-110619-01.fasta	TRUE	2019-06-11T00:00:00Z	Dudelange	B036-110619-01	0.222153	473	9		B036	0.998492	1948995	9		aspA,glnA,gltA,glyA,pgm,tkt,uncA,porA,fn_gyrA	100	100	486.922	76	33	22	104	43	109	31	860	40	2	0	9	1540	B036___76___33___22___104___43___109___31___860___40	genome match
B037-110619-01	B037	Bird	Corvus monedula	C. jejuni	45	ST-45 complex	4	7	10	4	1	7	1	2158	7	49	B037-110619-01.fasta	TRUE	2019-06-11T00:00:00Z	Dudelange	B037-110619-01	0.065498	63	9		B037	0.998953	393257	9		aspA,glnA,gltA,glyA,pgm,tkt,uncA,porA,fn_gyrA	100	97.9389	463.595	4	7	10	4	1	7	1	49	7	2	0	9	45	B037___4___7___10___4___1___7___1___49___7	genome match
B038-110619-03	B038	Bird	Corvus monedula	C. jejuni	10817	?	258	174	154	193	336	421	131	2161	103	2354	B038-110619-03.fasta	TRUE	2019-06-11T00:00:00Z	Dudelange	NA	NA	NA	0	aspA,glnA,gltA,glyA,pgm,tkt,uncA,porA,fn_gyrA	NA	NA	NA	NA	NA	NA	NA	NA	NA	NA	NA	NA	NA	NA	NA	NA	NA	NA	NA	NA	NA	NA	NA	false negative
B038-110619-01	B038	Bird	Corvus monedula	C. jejuni	10818	?	64	22	20	100	134	301	16	2159	104	391	B038-110619-01.fasta	TRUE	2019-06-11T00:00:00Z	Dudelange	B054-180619-01	0.019858	514	8	tkt	21-B038	0.999623	1018605	9		aspA,glnA,gltA,glyA,pgm,tkt,uncA,porA,fn_gyrA	100	97.2644	405.379	64	22	20	100	134	160	16	391	104	4	4	5	3536	B038___64___22___20___100___134___160___16___391___104	partial match
B038-110619-02	B038	Bird	Corvus monedula	C. jejuni	10811	?	64	33	20	181	94	17	16	2160	36	1279	B038-110619-02.fasta	TRUE	2019-06-11T00:00:00Z	Dudelange	B038-110619-02	0.751254	969	9		21-B038	0.999916	2689473	9		aspA,glnA,gltA,glyA,pgm,tkt,uncA,porA,fn_gyrA	100	100	491.626	64	33	20	181	94	17	16	1279	36	1	0	9	10811	B038___64___33___20___181___94___17___16___1279___36	genome match
B039-110619-03	B039	Bird	Corvus monedula	C. jejuni	10820	?	64	89	319	100	134	103	16	2162	11	1224	B039-110619-03.fasta	TRUE	2019-06-11T00:00:00Z	Dudelange	B039-110619-03	0.76926	320	9		21-B039	0.999496	5175304	9		aspA,glnA,gltA,glyA,pgm,tkt,uncA,porA,fn_gyrA	100	100	491.657	64	89	319	100	134	103	16	1224	11	1	0	9	10820	B039___64___89___319___100___134___103___16___1224___11	genome match
B045-180619-01	B045	Bird	Corvus monedula	C. jejuni	464	ST-464 complex	24	2	2	2	10	3	1	596	3	2348	B045-180619-01.fasta	TRUE	2019-06-18T00:00:00Z	Dudelange	B045-180619-01	0.597601	57	9		B045	0.99589	4019471	9		aspA,glnA,gltA,glyA,pgm,tkt,uncA,porA,fn_gyrA	100	100	491.126	24	2	2	2	10	3	1	2348	3	1	0	9	464	B045___24___2___2___2___10___3___1___2348___3	genome match
B047-180619-01	B047	Bird	Falco	C. jejuni	19	ST-21 complex	2	1	5	3	2	1	5	2165	8	327	B047-180619-01.fasta	TRUE	2019-06-18T00:00:00Z	Dudelange	B108-130819-01	0.507207	138	9		B047	0.995597	6990574	9		aspA,glnA,gltA,glyA,pgm,tkt,uncA,porA,fn_gyrA	100	100	490.611	2	1	5	3	2	1	5	327	8	1	0	9	19	B047___2___1___5___3___2___1___5___327___8	9MLST match
B050-180619-02	B050	Bird	Corvus monedula	C. jejuni	1080	?	10	2	107	137	120	76	1	2301	74	130	B050-180619-02.fasta	TRUE	2019-06-18T00:00:00Z	Dudelange	B300-140421-01	0.138138	303	9		B050	0.997563	894039	9		aspA,glnA,gltA,glyA,pgm,tkt,uncA,porA,fn_gyrA	100	100	473.991	10	2	107	137	120	76	1	130	74	2	0	9	1080	B050___10___2___107___137___120___76___1___130___74	9MLST match
B050-180619-01	B050	Bird	Corvus monedula	C. jejuni	10813	?	64	22	148	100	94	187	16	2166	11	2351	B050-180619-01.fasta	TRUE	2019-06-18T00:00:00Z	Dudelange	B050-180619-01	0.774109	972	9		B050	1	5832857	9		aspA,glnA,gltA,glyA,pgm,tkt,uncA,porA,fn_gyrA	100	100	490.223	64	22	148	100	94	187	16	2351	11	1	0	9	10813	B050___64___22___148___100___94___187___16___2351___11	genome match
B051-180619-02	B051	Bird	Corvus corone	C. jejuni	10815	?	18	81	68	143	134	153	16	2167	11	479	B051-180619-02.fasta	TRUE	2019-06-18T00:00:00Z	Dudelange	B051-180619-02	0.471458	973	9		21-B051	1	771349	9		aspA,glnA,gltA,glyA,pgm,tkt,uncA,porA,fn_gyrA	100	100	490.726	18	81	68	143	134	153	16	479	11	1	0	9	10815	B051___18___81___68___143___134___153___16___479___11	genome match
B052-180619-01	B052	Bird	Corvus monedula	C. jejuni	7815	?	64	105	203	100	134	94	16	2168	11	2352	B052-180619-01.fasta	TRUE	2019-06-18T00:00:00Z	Dudelange	B052-180619-01	0.303746	974	9		21-B052	0.999916	2208875	9		aspA,glnA,gltA,glyA,pgm,tkt,uncA,porA,fn_gyrA	100	99.6044	492.663	64	105	203	100	134	94	16	2352	11	2	4	5	7815	B052___64___105___203___100___134___94___16___2352___11	genome match
B054-180619-01	B054	Bird	Corvus corone	C. jejuni	3536	?	64	22	20	100	134	160	16	2169	104	391	B054-180619-01.fasta	TRUE	2019-06-18T00:00:00Z	Dudelange	B054-180619-01	0.02212	514	9		B054	0.999371	1506057	9		aspA,glnA,gltA,glyA,pgm,tkt,uncA,porA,fn_gyrA	100	99.5533	407.655	64	22	20	100	134	160	16	391	104	3	2	7	3536	B054___64___22___20___100___134___160___16___391___104	genome match
B054-180619-02	B054	Bird	Corvus corone	C. jejuni	801	?	64	70	68	97	122	106	16	2598	36	127	B054-180619-02.fasta	TRUE	2019-06-18T00:00:00Z	Dudelange	B113-130819-01	0.076217	977	9		B054	1	2851339	9		aspA,glnA,gltA,glyA,pgm,tkt,uncA,porA,fn_gyrA	100	100	473.857	64	70	68	97	122	106	16	127	36	2	4	5	801	B054___64___70___68___97___122___106___16___127___36	9MLST match
B063-020719-02	B063	Bird	Apus apus	C. jejuni	22	ST-22 complex	1	3	6	4	3	3	3	277	8	70	B063-020719-02.fasta	TRUE	2019-07-02T00:00:00Z	Dudelange	14651	0.055333	23	8	fn_gyrA	21-B063	0.999203	897586	9		aspA,glnA,gltA,glyA,pgm,tkt,uncA,porA,fn_gyrA	100	94.8633	326.29	1	3	6	4	3	3	3	70	1	6	2	7	22	B063___1___3___6___4___3___3___3___70___1	partial match
B063-020719-01	B063	Bird	Apus apus	C. jejuni	11384	ST-177 complex	17	2	670	5	8	2	4	2170	31	236	B063-020719-01.fasta	TRUE	2019-07-02T00:00:00Z	Dudelange	B103-300719-02	0.123842	117	8	gltA	21-B063	0.997526	981599	9		aspA,glnA,gltA,glyA,pgm,tkt,uncA,porA,fn_gyrA	100	96.39	435.391	17	2	8	5	8	2	4	236	31	3	0	9	177	B063___17___2___8___5___8___2___4___236___31	partial match
B067-020719-01	B067	Bird	Pica pica	C. jejuni	383	ST-283 complex	4	7	12	4	42	51	1	251	1	73	B067-020719-01.fasta	TRUE	2019-07-02T00:00:00Z	Dudelange	B067-020719-01	0.221487	44	9		21-B067	0.999958	1632758	9		aspA,glnA,gltA,glyA,pgm,tkt,uncA,porA,fn_gyrA	100	99.6511	470.969	4	7	12	4	42	51	1	73	1	2	1	8	383	B067___4___7___12___4___42___51___1___73___1	genome match
B068-020719-02	B068	Bird	Pica pica	C. jejuni	383	ST-283 complex	4	7	12	4	42	51	1	251	1	73	B068-020719-02.fasta	TRUE	2019-07-02T00:00:00Z	Dudelange	B067-020719-01	0.869312	44	9		21-B068	0.999874	4780879	9		aspA,glnA,gltA,glyA,pgm,tkt,uncA,porA,fn_gyrA	100	100	489.246	4	7	12	4	42	51	1	73	1	1	0	9	383	B068___4___7___12___4___42___51___1___73___1	9MLST match
B071-020719-01	B071	Bird	Corvus corone	C. jejuni	45	ST-45 complex	4	7	10	4	1	7	1	2171	7	44	B071-020719-01.fasta	TRUE	2019-07-02T00:00:00Z	Dudelange	B072-020719-02	0.499074	28	9		21-B071	0.996561	3624385	9		aspA,glnA,gltA,glyA,pgm,tkt,uncA,porA,fn_gyrA	100	100	492.27	4	7	10	4	1	7	1	44	7	1	0	9	45	B071___4___7___10___4___1___7___1___44___7	9MLST match
B083-160719-02	B083	Bird	Falco	C. jejuni	383	ST-283 complex	4	7	12	4	42	51	1	251	1	73	B083-160719-02.fasta	TRUE	2019-07-15T00:00:00Z	Dudelange	B067-020719-01	0.96285	44	9		21-B083	0.999664	4291952	9		aspA,glnA,gltA,glyA,pgm,tkt,uncA,porA,fn_gyrA	100	100	489.379	4	7	12	4	42	51	1	73	1	1	0	9	383	B083___4___7___12___4___42___51___1___73___1	9MLST match
B086-160719-01	B086	Bird	Columba	C. jejuni	383	ST-283 complex	4	7	12	4	42	51	1	251	1	73	B086-160719-01.fasta	TRUE	2019-07-15T00:00:00Z	Dudelange	B067-020719-01	0.962719	44	9		21-B086	0.99979	1914340	9		aspA,glnA,gltA,glyA,pgm,tkt,uncA,porA,fn_gyrA	100	100	489.285	4	7	12	4	42	51	1	73	1	1	0	9	383	B086___4___7___12___4___42___51___1___73___1	9MLST match
B096-300719-02	B096	Bird	Corvus corone	C. jejuni	951	?	18	100	82	24	138	116	63	2277	31	2358	B096-300719-02.fasta	TRUE	2019-07-30T00:00:00Z	Dudelange	B096-300719-02	1	975	9		21-B096	1	2110629	9		aspA,glnA,gltA,glyA,pgm,tkt,uncA,porA,fn_gyrA	100	100	496.241	18	100	82	24	138	116	63	2358	31	1	0	9	951	B096___18___100___82___24___138___116___63___2358___31	genome match
B100-300719-02	B100	Bird	Apus apus	C. jejuni	475	ST-48 complex	2	4	1	4	19	62	5	827	5	67	B100-300719-02.fasta	TRUE	2019-07-30T00:00:00Z	Dudelange	NA	NA	NA	1	aspA,glnA,gltA,pgm,tkt,uncA,porA,fn_gyrA	NA	NA	NA	NA	NA	NA	NA	NA	NA	NA	NA	NA	NA	NA	NA	NA	NA	NA	NA	NA	NA	NA	NA	false negative
B100-300719-01	B100	Bird	Apus apus	C. jejuni	383	ST-283 complex	4	7	12	4	42	51	1	251	1	73	B100-300719-01.fasta	TRUE	2019-07-30T00:00:00Z	Dudelange	B067-020719-01	0.960604	44	9		B100	0.999669	569431	9		aspA,glnA,gltA,glyA,pgm,tkt,uncA,porA,fn_gyrA	100	100	489.42	4	7	12	4	42	51	1	73	1	1	0	9	383	B100___4___7___12___4___42___51___1___73___1	9MLST match
B103-300719-02	B103	Bird	Turdus	C. jejuni	177	ST-177 complex	17	2	8	5	8	2	4	2172	31	236	B103-300719-02.fasta	TRUE	2019-07-30T00:00:00Z	Dudelange	100884	0.016609	225	8	porA	21-B103	0.995346	46074	7	glnA,porA	aspA,gltA,glyA,pgm,tkt,uncA,fn_gyrA	100	96.0629	355.286	17	2	8	5	8	2	4	4123	31	2	0	7	177	B103___17___2___8___5___8___2___4___4123___31	partial match
B112-130819-01	B112	Bird	Corvus corone	C. jejuni	7882	?	64	583	22	111	122	303	16	2599	36	2357	B112-130819-01.fasta	TRUE	2019-08-13T00:00:00Z	Dudelange	B112-130819-01	1	976	9		21-B112	1	3159542	9		aspA,glnA,gltA,glyA,pgm,tkt,uncA,porA,fn_gyrA	100	100	495.14	64	583	22	111	122	303	16	2357	36	1	0	9	7882	B112___64___583___22___111___122___303___16___2357___36	genome match
B114-130819-01	B114	Bird	Turdus	C. jejuni	10810	?	94	117	90	125	1094	147	100	2173	101	2355	B114-130819-01.fasta	TRUE	2019-08-13T00:00:00Z	Dudelange	B114-130819-01	0.897517	978	9		21-B114	1	2488218	9		aspA,glnA,gltA,glyA,pgm,tkt,uncA,porA,fn_gyrA	100	100	495.795	94	117	90	125	1094	147	100	2355	101	1	0	9	10810	B114___94___117___90___125___1094___147___100___2355___101	genome match
B114-130819-03	B114	Bird	Turdus	C. jejuni	1277	?	96	135	99	136	183	140	113	2600	105	2359	B114-130819-03.fasta	TRUE	2019-08-13T00:00:00Z	Dudelange	B114-130819-03	0.102483	979	9		21-B114	0.999958	127038	9		aspA,glnA,gltA,glyA,pgm,tkt,uncA,porA,fn_gyrA	100	95.7978	430.919	96	135	99	136	183	140	113	2359	105	2	0	9	1277	B114___96___135___99___136___183___140___113___2359___105	genome match
B119-270819-01	B119	Bird	Pica pica	C. jejuni	11004	?	15	33	72	875	753	103	16	2601	106	1772	B119-270819-01.fasta	TRUE	2019-08-27T00:00:00Z	Dudelange	B119-270819-01	1	980	9		21-B119	1	4394439	9		aspA,glnA,gltA,glyA,pgm,tkt,uncA,porA,fn_gyrA	100	100	496.154	15	33	72	875	753	103	16	1772	106	1	0	9	11004	B119___15___33___72___875___753___103___16___1772___106	genome match
B121-270819-02	B121	Bird	Corvus corone	C. jejuni	6591	?	64	105	20	77	94	103	16	2602	11	1634	B121-270819-02.fasta	TRUE	2019-08-27T00:00:00Z	Dudelange	B121-270819-02	0.599598	435	9		21-B121	0.991036	2208442	9		aspA,glnA,gltA,glyA,pgm,tkt,uncA,porA,fn_gyrA	100	100	495.302	64	105	20	77	94	103	16	1634	11	1	0	9	6591	B121___64___105___20___77___94___103___16___1634___11	genome match
B122-270819-02	B122	Bird	Buteo	C. jejuni	19	ST-21 complex	2	1	5	3	2	1	5	2165	8	327	B122-270819-02.fasta	TRUE	2019-08-27T00:00:00Z	Dudelange	B108-130819-01	0.509976	138	9		21-B122	0.997975	298155	9		aspA,glnA,gltA,glyA,pgm,tkt,uncA,porA,fn_gyrA	100	100	492.107	2	1	5	3	2	1	5	327	8	1	0	9	19	B122___2___1___5___3___2___1___5___327___8	9MLST match
B123-270819-01	B123	Bird	Falco	C. jejuni	19	ST-21 complex	2	1	5	3	2	1	5	2165	8	327	B123-270819-01.fasta	TRUE	2019-08-27T00:00:00Z	Dudelange	B108-130819-01	0.530977	138	9		B123	0.995798	578911	9		aspA,glnA,gltA,glyA,pgm,tkt,uncA,porA,fn_gyrA	100	100	492.207	2	1	5	3	2	1	5	327	8	1	0	9	19	B123___2___1___5___3___2___1___5___327___8	9MLST match
B158-221019-01	B158	Bird	Corvus corone	C. jejuni	5846	?	76	105	72	104	124	96	31	2304	40	858	B158-221019-01.fasta	TRUE	2019-10-22T00:00:00Z	Dudelange	B158-221019-01	0.690312	350	9		21-B158	0.99566	1737437	9		aspA,glnA,gltA,glyA,pgm,tkt,uncA,porA,fn_gyrA	100	100	496.324	76	105	72	104	124	96	31	858	40	1	0	9	5846	B158___76___105___72___104___124___96___31___858___40	genome match
B167-230720-01	B167	Bird	Apus apus	C. jejuni	1044	ST-658	2	10	2	4	19	3	6	84	27	25	B167-230720-01.fasta	TRUE	2020-07-23T00:00:00Z	Dudelange	B167-230720-01	0.9416	47	9		21-B167	0.999461	346243	9		aspA,glnA,gltA,glyA,pgm,tkt,uncA,porA,fn_gyrA	100	100	492.041	2	10	2	4	19	3	6	25	27	1	0	9	1044	B167___2___10___2___4___19___3___6___25___27	genome match
B190-130820-01	B190	Bird	Turdus	C. jejuni	11	ST-45	48	7	10	4	1	7	1	414	7	217	B190-130820-01.fasta	TRUE	2020-08-13T00:00:00Z	Dudelange	B183-300720-01	0.069731	319	9		21-B190	0.997523	363793	9		aspA,glnA,gltA,glyA,pgm,tkt,uncA,porA,fn_gyrA	100	97.8089	454.891	48	7	10	4	1	7	1	217	7	3	0	9	11	B190___48___7___10___4___1___7___1___217___7	9MLST match
B193-200820-02	B193	Bird	Anas	C. jejuni	5207	NA	37	187	4	28	19	24	23	2614	51	2356	B193-200820-02.fasta	TRUE	2020-08-20T00:00:00Z	Wasserbillig	B193-200820-02	0.995431	981	9		B193	1	5037909	9		aspA,glnA,gltA,glyA,pgm,tkt,uncA,porA,fn_gyrA	100	100	487.171	37	187	4	28	19	24	23	2356	51	1	0	9	5207	B193___37___187___4___28___19___24___23___2356___51	genome match
B194-200820-01	B194	Bird	Alopochen aegyptiacus	C. jejuni	8614	ST-1332	2	1	4	28	58	672	58	2612	36	6	B194-200820-01.fasta	TRUE	2020-08-20T00:00:00Z	Wasserbillig	B189-130820-01	0.996962	181	9		21-B194	0.999874	4634237	9		aspA,glnA,gltA,glyA,pgm,tkt,uncA,porA,fn_gyrA	100	100	492.184	2	1	4	28	58	672	58	6	36	1	0	9	8614	B194___2___1___4___28___58___672___58___6___36	9MLST match
B203-270820-04	B203	Bird	Corvus corone	C. jejuni	677	ST-677 complex	10	81	50	99	120	76	52	36	19	276	B203-270820-04.fasta	TRUE	2020-08-27T00:00:00Z	Dudelange	B046-180619-01	0.014812	101	9		21-B203	0.99979	64309	9		aspA,glnA,gltA,glyA,pgm,tkt,uncA,porA,fn_gyrA	100	92.12	343.227	10	81	50	99	120	76	52	276	19	6	0	9	677	B203___10___81___50___99___120___76___52___276___19	9MLST match
B203-270820-01	B203	Bird	Corvus corone	C. jejuni	11385	?	4	43	9	5	8	46	21	3163	80	203	B203-270820-01.fasta	TRUE	2020-08-27T00:00:00Z	Dudelange	B203-270820-01	0.787747	174	9		21-B203	0.99891	4154178	9		aspA,glnA,gltA,glyA,pgm,tkt,uncA,porA,fn_gyrA	100	100	496.177	4	43	9	5	8	46	21	203	80	1	0	9	11385	B203___4___43___9___5___8___46___21___203___80	genome match
B203-270820-02	B203	Bird	Corvus corone	C. jejuni	11381	?	577	2	397	91	884	748	51	3164	109	2368	B203-270820-02.fasta	TRUE	2020-08-27T00:00:00Z	Dudelange	NA	NA	NA	0	aspA,glnA,gltA,glyA,pgm,tkt,uncA,porA,fn_gyrA	NA	NA	NA	NA	NA	NA	NA	NA	NA	NA	NA	NA	NA	NA	NA	NA	NA	NA	NA	NA	NA	NA	NA	false negative
B221-240920-01	B221	Bird	Alopochen aegyptiacus	C. jejuni	1294	?	2	59	96	48	131	24	57	2460	13	152	B221-240920-01.fasta	TRUE	2020-09-24T00:00:00Z	Wasserbillig	B221-240920-01	0.203417	189	9		21-B221	0.993866	2224645	9		aspA,glnA,gltA,glyA,pgm,tkt,uncA,porA,fn_gyrA	100	100	492.158	2	59	96	48	131	24	57	152	13	2	7	2	1294	B221___2___59___96___48___131___24___57___152___13	genome match
B250-060321-01	B250	Bird	Emberiza citrinella	C. jejuni	11376	?	578	143	116	151	198	189	33	3165	108	2370	B250-060321-01.fasta	TRUE	2021-03-06T00:00:00Z	Uerbersyren	B250-060321-01	0.842733	983	9		B250	1	88718	9		aspA,glnA,gltA,glyA,pgm,tkt,uncA,porA,fn_gyrA	100	100	494.735	578	143	116	151	198	189	33	2370	108	1	0	9	11376	B250___578___143___116___151___198___189___33___2370___108	genome match
B251-060321-01	B251	Bird	Emberiza citrinella	C. jejuni	11376	?	578	143	116	151	198	189	33	3165	108	2370	B251-060321-01.fasta	TRUE	2021-03-06T00:00:00Z	Uerbersyren	B250-060321-01	0.694998	983	9		B251	0.998897	34282	9		aspA,glnA,gltA,glyA,pgm,tkt,uncA,porA,fn_gyrA	100	100	489.998	578	143	116	151	198	189	33	2370	108	1	0	9	11376	B251___578___143___116___151___198___189___33___2370___108	9MLST match
B266-270321-01	B266	Bird	Sylvia atricapilla	C. jejuni	6313	?	323	439	384	483	611	512	371	3166	107	2369	B266-270321-01.fasta	TRUE	2021-03-27T00:00:00Z	Uerbersyren	B302-140421-01	0.937711	986	9		B266	0.99979	213147	9		aspA,glnA,gltA,glyA,pgm,tkt,uncA,porA,fn_gyrA	100	100	495.924	323	439	384	483	611	512	371	2369	107	1	0	9	6313	B266___323___439___384___483___611___512___371___2369___107	9MLST match
B284-140421-02	B284	Bird	Sylvia atricapilla	C. jejuni	11413	?	95	795	671	892	1137	872	717	3257	22	2371	B284-140421-02.fasta	TRUE	2021-04-14T00:00:00Z	Uerbersyren	B284-140421-02	0.989095	984	8	fn_gyrA	B284	1	4365791	9		aspA,glnA,gltA,glyA,pgm,tkt,uncA,porA,fn_gyrA	100	100	491.709	95	795	671	892	1137	872	717	2371	110	1	0	9	11413	B284___95___795___671___892___1137___872___717___2371___110	genome match
B285-140421-02	B285	Bird	Sylvia atricapilla	C. jejuni	1316	?	95	2	94	127	181	144	110	3167	74	463	B285-140421-02.fasta	TRUE	2021-04-14T00:00:00Z	Uerbersyren	B285-140421-02	1	985	9		B285	1	6216924	9		aspA,glnA,gltA,glyA,pgm,tkt,uncA,porA,fn_gyrA	100	100	492.219	95	2	94	127	181	144	110	463	74	1	0	9	1316	B285___95___2___94___127___181___144___110___463___74	genome match
B288-140421-02	B288	Bird	Sylvia atricapilla	C. jejuni	6313	?	323	439	384	483	611	512	371	3168	107	2369	B288-140421-02.fasta	TRUE	2021-04-14T00:00:00Z	Uerbersyren	B302-140421-01	0.999091	986	9		B288	0.99979	3597499	9		aspA,glnA,gltA,glyA,pgm,tkt,uncA,porA,fn_gyrA	100	100	496.135	323	439	384	483	611	512	371	2369	107	1	0	9	6313	B288___323___439___384___483___611___512___371___2369___107	9MLST match
B299-140421-01	B299	Bird	Sylvia atricapilla	C. jejuni	6313	?	323	439	384	483	611	512	371	3168	107	2369	B299-140421-01.fasta	TRUE	2021-04-14T00:00:00Z	Uerbersyren	B302-140421-01	0.999967	986	9		B299	0.999832	5459398	9		aspA,glnA,gltA,glyA,pgm,tkt,uncA,porA,fn_gyrA	100	100	496.24	323	439	384	483	611	512	371	2369	107	1	0	9	6313	B299___323___439___384___483___611___512___371___2369___107	9MLST match
B300-140421-01	B300	Bird	Sylvia atricapilla	C. jejuni	1080	?	10	2	107	137	120	76	1	3169	74	130	B300-140421-01.fasta	TRUE	2021-04-14T00:00:00Z	Uerbersyren	B300-140421-01	0.807581	303	9		B300	0.994248	4805983	9		aspA,glnA,gltA,glyA,pgm,tkt,uncA,porA,fn_gyrA	100	100	491.961	10	2	107	137	120	76	1	130	74	1	0	9	1080	B300___10___2___107___137___120___76___1___130___74	genome match
B302-140421-01	B302	Bird	Sylvia atricapilla	C. jejuni	6313	?	323	439	384	483	611	512	371	3168	107	2369	B302-140421-01.fasta	TRUE	2021-04-14T00:00:00Z	Uerbersyren	B302-140421-01	1	986	9		B302	0.999958	3787100	9		aspA,glnA,gltA,glyA,pgm,tkt,uncA,porA,fn_gyrA	100	100	496.271	323	439	384	483	611	512	371	2369	107	1	0	9	6313	B302___323___439___384___483___611___512___371___2369___107	genome match
B303-140421-01	B303	Bird	Emberiza citrinella	C. jejuni	11376	?	578	143	116	151	198	189	33	3165	108	2370	B303-140421-01.fasta	TRUE	2021-04-14T00:00:00Z	Uerbersyren	B250-060321-01	0.820055	983	9		B303	1	26947	8	glnA	aspA,gltA,glyA,pgm,tkt,uncA,porA,fn_gyrA	100	100	498.736	578	143	116	151	198	189	33	2370	108	1	0	8	11376	B303___578___143___116___151___198___189___33___2370___108	9MLST match
B308-140421-01	B308	Bird	Emberiza citrinella	C. jejuni	11376	?	578	143	116	151	198	189	33	3165	108	2370	B308-140421-01.fasta	TRUE	2021-04-14T00:00:00Z	Uerbersyren	B250-060321-01	0.999869	983	9		B308	1	1324437	9		aspA,glnA,gltA,glyA,pgm,tkt,uncA,porA,fn_gyrA	100	100	496.133	578	143	116	151	198	189	33	2370	108	1	0	9	11376	B308___578___143___116___151___198___189___33___2370___108	9MLST match
B318-050521-01	B318	Bird	Asio otus	C. jejuni	45	ST-45 complex	4	7	10	4	1	7	1	2042	7	49	B318-050521-01.fasta	TRUE	2021-05-05T00:00:00Z	Dudelange	B037-110619-01	0.391931	63	9		B318	0.997106	3942328	9		aspA,glnA,gltA,glyA,pgm,tkt,uncA,porA,fn_gyrA	100	100	492.362	4	7	10	4	1	7	1	49	7	1	0	9	45	B318___4___7___10___4___1___7___1___49___7	9MLST match
B320-050521-02	B320	Bird	Pica pica	C. jejuni	4570	?	64	22	20	100	242	204	16	3170	37	1795	B320-050521-02.fasta	TRUE	2021-05-05T00:00:00Z	Dudelange	B320-050521-02	0.738214	285	9		B320	0.995053	2271464	9		aspA,glnA,gltA,glyA,pgm,tkt,uncA,porA,fn_gyrA	100	100	494.002	64	22	20	100	242	204	16	1795	37	1	0	9	4570	B320___64___22___20___100___242___204___16___1795___37	genome match
B321-050521-01	B321	Bird	Pica pica	C. jejuni	11383	?	64	33	78	18	1136	86	16	3171	11	1598	B321-050521-01.fasta	TRUE	2021-05-05T00:00:00Z	Dudelange	B321-050521-01	0.910212	987	9		B321	0.999919	124503	9		aspA,glnA,gltA,glyA,pgm,tkt,uncA,porA,fn_gyrA	100	100	495.783	64	33	78	18	1136	86	16	1598	11	1	0	9	11383	B321___64___33___78___18___1136___86___16___1598___11	genome match
B325-250521-01	B325	Bird	Corvus monedula	C. jejuni	563	ST-177 complex	17	5	8	5	8	2	4	3172	31	909	B325-250521-01.fasta	TRUE	2021-05-25T00:00:00Z	Dudelange	B325-250521-01	0.426228	117	9		B325	0.996267	2409690	9		aspA,glnA,gltA,glyA,pgm,tkt,uncA,porA,fn_gyrA	100	100	491.87	17	5	8	5	8	2	4	909	31	1	0	9	563	B325___17___5___8___5___8___2___4___909___31	genome match
B326-250521-01	B326	Bird	Corvus monedula	C. jejuni	4570	?	64	22	20	100	242	204	16	3170	37	1795	B326-250521-01.fasta	TRUE	2021-05-25T00:00:00Z	Dudelange	B320-050521-02	0.272435	285	9		B326	0.997857	1073006	9		aspA,glnA,gltA,glyA,pgm,tkt,uncA,porA,fn_gyrA	100	100	489.591	64	22	20	100	242	204	16	1795	37	2	2	7	4570	B326___64___22___20___100___242___204___16___1795___37	9MLST match
B327-250521-01	B327	Bird	Corvus corone	C. jejuni	11382	?	80	70	164	98	123	229	16	3173	31	1468	B327-250521-01.fasta	TRUE	2021-05-25T00:00:00Z	Dudelange	B327-250521-01	0.747866	205	9		B327	0.992107	3235964	9		aspA,glnA,gltA,glyA,pgm,tkt,uncA,porA,fn_gyrA	100	100	496.491	80	70	164	98	123	229	16	1468	31	1	0	9	11382	B327___80___70___164___98___123___229___16___1468___31	genome match
B328-250521-02	B328	Bird	Corvus corone	C. jejuni	6386	?	64	95	20	100	514	301	60	3174	36	406	B328-250521-02.fasta	TRUE	2021-05-25T00:00:00Z	Dudelange	B328-250521-02	0.962445	988	9		B328	0.999916	603959	9		aspA,glnA,gltA,glyA,pgm,tkt,uncA,porA,fn_gyrA	100	100	489.735	64	95	20	100	514	301	60	406	36	1	0	9	6386	B328___64___95___20___100___514___301___60___406___36	genome match
B329-250521-01	B329	Bird	Turdus	C. jejuni	677	ST-677 complex	10	81	50	99	120	76	52	36	19	276	B329-250521-01.fasta	TRUE	2021-05-25T00:00:00Z	Dudelange	B046-180619-01	0.948581	101	9		B329	0.999958	8307703	9		aspA,glnA,gltA,glyA,pgm,tkt,uncA,porA,fn_gyrA	100	100	492.175	10	81	50	99	120	76	52	276	19	1	0	9	677	B329___10___81___50___99___120___76___52___276___19	9MLST match
B330-250521-01	B330	Bird	Sturnus	C. jejuni	677	ST-677 complex	10	81	50	99	120	76	52	2070	19	276	B330-250521-01.fasta	TRUE	2021-05-25T00:00:00Z	Dudelange	B046-180619-01	0.99961	101	9		B330	0.999916	8877424	9		aspA,glnA,gltA,glyA,pgm,tkt,uncA,porA,fn_gyrA	100	100	492.276	10	81	50	99	120	76	52	276	19	1	0	9	677	B330___10___81___50___99___120___76___52___276___19	9MLST match
B331-250521-01	B331	Bird	Parus major	C. jejuni	45	ST-45 complex	4	7	10	4	1	7	1	297	7	49	B331-250521-01.fasta	TRUE	2021-05-25T00:00:00Z	Dudelange	B037-110619-01	0.039203	63	9		B331	0.997859	740002	9		aspA,glnA,gltA,glyA,pgm,tkt,uncA,porA,fn_gyrA	100	99.1922	477.171	4	7	10	4	1	7	1	49	7	3	6	3	45	B331___4___7___10___4___1___7___1___49___7	9MLST match
B333-250521-01	B333	Bird	Turdus	C. jejuni	11377	?	98	122	98	891	180	150	113	3175	101	970	B333-250521-01.fasta	TRUE	2021-05-25T00:00:00Z	Dudelange	B333-250521-01	1	989	9		B333	1	2363119	9		aspA,glnA,gltA,glyA,pgm,tkt,uncA,porA,fn_gyrA	100	100	496.174	98	122	98	891	180	150	113	970	101	1	0	9	11377	B333___98___122___98___891___180___150___113___970___101	genome match
B335-070621-01	B335	Bird	Corvus monedula	C. jejuni	11584	?	64	22	20	189	134	94	16	3258	11	2372	B335-070621-01.fasta	TRUE	2021-06-07T00:00:00Z	Dudelange	B335-070621-01	0.418129	990	9		B335	1	899827	9		aspA,glnA,gltA,glyA,pgm,tkt,uncA,porA,fn_gyrA	100	100	488.867	64	22	20	189	134	94	16	2372	11	1	0	9	11584	B335___64___22___20___189___134___94___16___2372___11	genome match
B336-070621-02	B336	Bird	Corvus monedula	C. jejuni	1481	?	35	5	9	5	8	2	2	3177	31	1836	B336-070621-02.fasta	TRUE	2021-06-07T00:00:00Z	Dudelange	B336-070621-02	0.290403	991	9		B336	1	859779	9		aspA,glnA,gltA,glyA,pgm,tkt,uncA,porA,fn_gyrA	100	100	485.304	35	5	9	5	8	2	2	1836	31	2	0	9	1481	B336___35___5___9___5___8___2___2___1836___31	genome match
B336-070621-01	B336	Bird	Corvus monedula	C. jejuni	11379	?	64	226	203	189	652	54	16	3176	11	2367	B336-070621-01.fasta	TRUE	2021-06-07T00:00:00Z	Dudelange	B338-070621-02	0.464153	992	9		B336	0.999665	1943365	9		aspA,glnA,gltA,glyA,pgm,tkt,uncA,porA,fn_gyrA	100	100	491.343	64	226	203	189	652	54	16	2367	11	1	0	9	11379	B336___64___226___203___189___652___54___16___2367___11	9MLST match
B337-070621-01	B337	Bird	Pica pica	C. jejuni	1044	ST-658 complex	2	10	2	4	19	3	6	84	27	25	B337-070621-01.fasta	TRUE	2021-06-07T00:00:00Z	Dudelange	B167-230720-01	0.731823	47	9		B337	0.999958	1676056	9		aspA,glnA,gltA,glyA,pgm,tkt,uncA,porA,fn_gyrA	100	100	491.033	2	10	2	4	19	3	6	25	27	1	0	9	1044	B337___2___10___2___4___19___3___6___25___27	9MLST match
B338-070621-02	B338	Bird	Corvus monedula	C. jejuni	11379	?	64	226	203	189	652	54	16	3178	11	2367	B338-070621-02.fasta	TRUE	2021-06-07T00:00:00Z	Dudelange	B338-070621-02	0.710568	992	9		B338	0.999958	2992383	9		aspA,glnA,gltA,glyA,pgm,tkt,uncA,porA,fn_gyrA	100	100	491.998	64	226	203	189	652	54	16	2367	11	1	0	9	11379	B338___64___226___203___189___652___54___16___2367___11	genome match
B339-070621-01	B339	Bird	Corvus corone	C. jejuni	267	ST-283 complex	4	7	40	4	42	51	1	1407	1	73	B339-070621-01.fasta	TRUE	2021-06-07T00:00:00Z	Dudelange	B339-070621-01	0.939091	44	9		B339	0.999412	3232186	9		aspA,glnA,gltA,glyA,pgm,tkt,uncA,porA,fn_gyrA	100	100	489.226	4	7	40	4	42	51	1	73	1	1	0	9	267	B339___4___7___40___4___42___51___1___73___1	genome match
B342-070621-01	B342	Bird	Dendocopos	C. jejuni	19	ST-21 complex	2	1	5	3	2	1	5	82	8	7	B342-070621-01.fasta	TRUE	2021-06-07T00:00:00Z	Dudelange	5895	0.119001	19	8	fn_gyrA	B342	1	130591	9		aspA,glnA,gltA,glyA,pgm,tkt,uncA,porA,fn_gyrA	100	91.5956	380.335	2	1	5	3	2	1	5	7	1	2	0	9	19	B342___2___1___5___3___2___1___5___7___1	partial match
B345-080621-01	B345	Bird	Prunella modularis	C. jejuni	383	ST-283 complex	4	7	12	4	42	51	1	251	1	73	B345-080621-01.fasta	TRUE	2021-06-07T00:00:00Z	Uerbersyren	B067-020719-01	0.66805	44	9		B345	0.999874	3153635	9		aspA,glnA,gltA,glyA,pgm,tkt,uncA,porA,fn_gyrA	100	100	488.814	4	7	12	4	42	51	1	73	1	1	0	9	383	B345___4___7___12___4___42___51___1___73___1	9MLST match
B353-210621-01	B353	Bird	Corvus monedula	C. jejuni	448	?	61	70	22	18	2	74	47	2506	31	639	B353-210621-01.fasta	TRUE	2021-06-21T00:00:00Z	Dudelange	B353-210621-01	0.757184	379	9		B353	0.995765	1314283	9		aspA,glnA,gltA,glyA,pgm,tkt,uncA,porA,fn_gyrA	100	100	496.486	61	70	22	18	2	74	47	639	31	1	0	9	448	B353___61___70___22___18___2___74___47___639___31	genome match
B354-210621-01	B354	Bird	Garrulus	C. jejuni	2162	?	35	43	8	51	8	2	21	3179	7	634	B354-210621-01.fasta	TRUE	2021-06-21T00:00:00Z	Dudelange	B354-210621-01	0.896638	292	9		B354	0.999042	1106140	9		aspA,glnA,gltA,glyA,pgm,tkt,uncA,porA,fn_gyrA	100	100	492.184	35	43	8	51	8	2	21	634	7	1	0	9	2162	B354___35___43___8___51___8___2___21___634___7	genome match
B355-210621-01	B355	Bird	Fringilla	C. jejuni	267	ST-283 complex	4	7	40	4	42	51	1	2744	1	73	B355-210621-01.fasta	TRUE	2021-06-21T00:00:00Z	Dudelange	B339-070621-01	0.90124	44	9		B355	0.999706	4929073	9		aspA,glnA,gltA,glyA,pgm,tkt,uncA,porA,fn_gyrA	100	100	489.28	4	7	40	4	42	51	1	73	1	1	0	9	267	B355___4___7___40___4___42___51___1___73___1	9MLST match
B357-210621-01	B357	Bird	Corvus monedula	C. jejuni	11378	?	35	5	8	51	8	2	21	3180	7	1621	B357-210621-01.fasta	TRUE	2021-06-21T00:00:00Z	Dudelange	B357-210621-01	0.842772	292	9		B357	0.998727	233548	9		aspA,glnA,gltA,glyA,pgm,tkt,uncA,porA,fn_gyrA	100	100	491.806	35	5	8	51	8	2	21	1621	7	1	0	9	11378	B357___35___5___8___51___8___2___21___1621___7	genome match
B358-210621-01	B358	Bird	Turdus	C. jejuni	11	ST-45 complex	48	7	10	4	1	7	1	3181	7	217	B358-210621-01.fasta	TRUE	2021-06-21T00:00:00Z	Dudelange	B072-020719-02	0.349133	28	7	aspA,porA	B358	0.999622	4250671	9		aspA,glnA,gltA,glyA,pgm,tkt,uncA,porA,fn_gyrA	100	100	491.99	4	7	10	4	1	7	1	44	7	1	0	9	45	B358___4___7___10___4___1___7___1___44___7	partial match
B361-210621-01	B361	Bird	Turdus	C. jejuni	230	ST-45 complex	4	7	41	4	42	7	1	2282	1	217	B361-210621-01.fasta	TRUE	2021-06-21T00:00:00Z	Dudelange	B361-210621-01	0.842766	44	9		B361	0.999958	4704782	9		aspA,glnA,gltA,glyA,pgm,tkt,uncA,porA,fn_gyrA	100	100	492.275	4	7	41	4	42	7	1	217	1	1	0	9	230	B361___4___7___41___4___42___7___1___217___1	genome match
B362-210621-01	B362	Bird	Turdus	C. jejuni	267	ST-283 complex	4	7	40	4	42	51	1	2744	1	73	B362-210621-01.fasta	TRUE	2021-06-21T00:00:00Z	Dudelange	B339-070621-01	0.825812	44	9		B362	0.999958	2911212	9		aspA,glnA,gltA,glyA,pgm,tkt,uncA,porA,fn_gyrA	100	100	489.138	4	7	40	4	42	51	1	73	1	1	0	9	267	B362___4___7___40___4___42___51___1___73___1	9MLST match
B364-210621-01	B364	Bird	Pica pica	C. jejuni	11380	?	18	33	72	98	116	871	6	3182	11	200	B364-210621-01.fasta	TRUE	2021-06-21T00:00:00Z	Dudelange	B364-210621-01	0.989677	993	9		B364	1	778619	9		aspA,glnA,gltA,glyA,pgm,tkt,uncA,porA,fn_gyrA	100	100	493.74	18	33	72	98	116	871	6	200	11	1	0	9	11380	B364___18___33___72___98___116___871___6___200___11	genome match
W021-240919-01	W021	Surface water	Moselle	C. jejuni	704	?	2	29	4	27	10	25	57	2604	13	886	W021-240919-01.fasta	TRUE	2019-09-12T00:00:00Z	Moselle (Wasserbillig)	W021-240919-01	0.785842	227	9		21-W021	0.998731	102585	9		aspA,glnA,gltA,glyA,pgm,tkt,uncA,porA,fn_gyrA	100	100	489.188	2	29	4	27	10	25	57	886	13	1	0	9	704	W021___2___29___4___27___10___25___57___886___13	genome match
W052-240920-02	W052	Surface water	Sûre	C. jejuni	991	ST-692 complex	37	52	57	26	107	29	23	2620	4	6	W052-240920-02.fasta	TRUE	2020-09-24T00:00:00Z	Sûre (Wasserbillig)	87100	0.244746	136	7	pgm,fn_gyrA	W052	0.999958	283598	6	glnA,gltA,fn_gyrA	aspA,glyA,pgm,tkt,uncA,porA	100	99.4983	494.443	37	52	57	26	129	29	23	6	13	2	1	5	699	W052___37___52___57___26___129___29___23___6___13	partial match
W087-210621-01	W087	Surface water	Alzette	C. jejuni	10102	?	64	22	203	100	134	160	60	3184	11	2366	W087-210621-01.fasta	TRUE	2021-06-21T00:00:00Z	Alzette Hesperange Amont step	W087-210621-01	0.028762	457	9		W087	0.99933	97378	9		aspA,glnA,gltA,glyA,pgm,tkt,uncA,porA,fn_gyrA	100	90.4711	391.492	64	22	203	100	134	160	60	2366	11	3	6	3	10102	W087___64___22___203___100___134___160___60___2366___11	genome match
B025-070519-02	B025	Bird	Corvus corone	C. jejuni	677	ST-677 complex	10	81	50	99	120	76	52	942	19	276	B025-070519-02.fasta	TRUE	2019-05-07T00:00:00Z	Dudelange	NA	NA	NA	NA	NA	NA	NA	NA	NA	NA	NA	NA	NA	NA	NA	NA	NA	NA	NA	NA	NA	NA	NA	NA	NA	NA	NA	NA	false negative
B027-070519-01	B027	Bird	Pica pica	C. jejuni	45	ST-45 complex	4	7	10	4	1	7	1	2155	7	49	B027-070519-01.fasta	TRUE	2019-05-07T00:00:00Z	Dudelange	NA	NA	NA	NA	NA	NA	NA	NA	NA	NA	NA	NA	NA	NA	NA	NA	NA	NA	NA	NA	NA	NA	NA	NA	NA	NA	NA	NA	false negative
B189-130820-01	B189	Bird	Turdus	C. jejuni	8614	ST-1332	2	1	4	28	58	672	58	2612	36	6	B189-130820-01.fasta	TRUE	2020-08-13T00:00:00Z	Dudelange	NA	NA	NA	NA	NA	NA	NA	NA	NA	NA	NA	NA	NA	NA	NA	NA	NA	NA	NA	NA	NA	NA	NA	NA	NA	NA	NA	NA	false negative
B198-200820-01	B198	Bird	Alopochen aegyptiacus	C. jejuni	11	ST-45	48	7	10	4	1	7	1	414	7	217	B198-200820-01.fasta	TRUE	2020-08-20T00:00:00Z	Wasserbillig	NA	NA	NA	NA	NA	NA	NA	NA	NA	NA	NA	NA	NA	NA	NA	NA	NA	NA	NA	NA	NA	NA	NA	NA	NA	NA	NA	NA	false negative
W025-02122019-02	W025	Surface water	Alzette	C. jejuni	11466	?	18	33	649	325	116	104	6	2278	100	2349	W025-02122019-02.fasta	TRUE	2019-12-02T00:00:00Z	Alzette Hesperange Amont step	NA	NA	NA	NA	NA	NA	NA	NA	NA	NA	NA	NA	NA	NA	NA	NA	NA	NA	NA	NA	NA	NA	NA	NA	NA	NA	NA	NA	false negative
NA	B025	NA	NA	NA	NA	NA	NA	NA	NA	NA	NA	NA	NA	NA	NA	NA	NA	NA	NA	NA	85135	0.945895	111	NA	NA	B25	0.999666	647314	8	gltA	aspA,glnA,glyA,pgm,tkt,uncA,porA,fn_gyrA	100	100	504.898	4	7	667	4	1	7	1	49	7	1	0	8	11224	B025___4___7___667___4___1___7___1___49___7	additional strain
NA	B027	NA	NA	NA	NA	NA	NA	NA	NA	NA	NA	NA	NA	NA	NA	NA	NA	NA	NA	NA	B046-180619-01	0.839247	101	NA	NA	21-B027	0.999958	4842611	9		aspA,glnA,gltA,glyA,pgm,tkt,uncA,porA,fn_gyrA	100	100	491.975	10	81	50	99	120	76	52	276	19	1	0	9	677	B027___10___81___50___99___120___76___52___276___19	additional strain
NA	B027	NA	NA	NA	NA	NA	NA	NA	NA	NA	NA	NA	NA	NA	NA	NA	NA	NA	NA	NA	B096-300719-02	0.151586	975	NA	NA	21-B027	0.999958	642920	8	aspA	glnA,gltA,glyA,pgm,tkt,uncA,porA,fn_gyrA	100	100	484.21	18	100	82	24	138	116	63	2358	31	2	0	8	951	B027___18___100___82___24___138___116___63___2358___31	additional strain
NA	B028	NA	NA	NA	NA	NA	NA	NA	NA	NA	NA	NA	NA	NA	NA	NA	NA	NA	NA	NA	B096-300719-02	0.720224	975	NA	NA	B028	1	6521825	9		aspA,glnA,gltA,glyA,pgm,tkt,uncA,porA,fn_gyrA	100	100	494.346	18	100	82	24	138	116	63	2358	31	1	0	9	951	B028___18___100___82___24___138___116___63___2358___31	additional strain
NA	B035	NA	NA	NA	NA	NA	NA	NA	NA	NA	NA	NA	NA	NA	NA	NA	NA	NA	NA	NA	33960	0.414136	708	NA	NA	21-B035	0.999833	947400	9		aspA,glnA,gltA,glyA,pgm,tkt,uncA,porA,fn_gyrA	100	100	490.447	64	22	85	98	652	270	60	4439	380	1	0	9	7831	B035___64___22___85___98___652___270___60___4439___380	additional strain
NA	B035	NA	NA	NA	NA	NA	NA	NA	NA	NA	NA	NA	NA	NA	NA	NA	NA	NA	NA	NA	78916	0.117024	867	NA	NA	21-B035	0.999958	550647	9		aspA,glnA,gltA,glyA,pgm,tkt,uncA,porA,fn_gyrA	100	97.0667	472.602	64	95	20	100	514	101	60	1157	11	2	2	7	6427	B035___64___95___20___100___514___101___60___1157___11	additional strain
NA	B035	NA	NA	NA	NA	NA	NA	NA	NA	NA	NA	NA	NA	NA	NA	NA	NA	NA	NA	NA	33945	0.060304	704	NA	NA	21-B035	0.99762	713975	6	glnA,tkt,porA	aspA,gltA,glyA,pgm,uncA,fn_gyrA	100	100	470.972	64	89	20	98	134	593	16	2532	11	3	4	2	7813	B035___64___89___20___98___134___593___16___2532___11	additional strain
NA	B035	NA	NA	NA	NA	NA	NA	NA	NA	NA	NA	NA	NA	NA	NA	NA	NA	NA	NA	NA	B040F-110619-01	0.016459	515	NA	NA	21-B035	0.995448	14057	5	glnA,tkt,porA,fn_gyrA	aspA,gltA,glyA,pgm,uncA	100	90.232	286.75	258	174	207	193	336	314	131	2347	99	12	0	5	11002	B035___258___174___207___193___336___314___131___2347___99	additional strain
NA	B035	NA	NA	NA	NA	NA	NA	NA	NA	NA	NA	NA	NA	NA	NA	NA	NA	NA	NA	NA	33954	0.011827	706	NA	NA	21-B035	0.996033	21056	5	glnA,gltA,pgm,tkt	aspA,glyA,uncA,porA,fn_gyrA	100	99.07	422.481	258	174	474	193	753	595	131	4437	298	17	3	2	7825	B035___258___174___474___193___753___595___131___4437___298	additional strain
NA	B036	NA	NA	NA	NA	NA	NA	NA	NA	NA	NA	NA	NA	NA	NA	NA	NA	NA	NA	NA	B113-130819-02	0.069232	515	NA	NA	B036	0.999581	295978	9		aspA,glnA,gltA,glyA,pgm,tkt,uncA,porA,fn_gyrA	100	99.5089	455.086	258	174	207	193	336	314	229	2347	99	3	0	9	7836	B036___258___174___207___193___336___314___229___2347___99	additional strain
NA	B036	NA	NA	NA	NA	NA	NA	NA	NA	NA	NA	NA	NA	NA	NA	NA	NA	NA	NA	NA	B338-070621-02	0.054684	992	NA	NA	B036	0.998869	1223429	7	pgm,porA	aspA,glnA,gltA,glyA,tkt,uncA,fn_gyrA	100	93.83	398.311	64	226	203	189	652	54	16	2367	11	6	3	4	11379	B036___64___226___203___189___652___54___16___2367___11	additional strain
NA	B036	NA	NA	NA	NA	NA	NA	NA	NA	NA	NA	NA	NA	NA	NA	NA	NA	NA	NA	NA	43659	0.010719	749	NA	NA	B036	0.997863	1688441	8	glyA	aspA,glnA,gltA,pgm,tkt,uncA,porA,fn_gyrA	100	100	464.541	64	22	85	98	134	54	16	579	11	10	6	2	2753	B036___64___22___85___98___134___54___16___579___11	additional strain
NA	B037	NA	NA	NA	NA	NA	NA	NA	NA	NA	NA	NA	NA	NA	NA	NA	NA	NA	NA	NA	78916	0.211653	867	NA	NA	B037	0.99933	640141	9		aspA,glnA,gltA,glyA,pgm,tkt,uncA,porA,fn_gyrA	100	99.8067	472.456	64	95	20	100	514	101	60	1157	11	1	0	9	6427	B037___64___95___20___100___514___101___60___1157___11	additional strain
NA	B037	NA	NA	NA	NA	NA	NA	NA	NA	NA	NA	NA	NA	NA	NA	NA	NA	NA	NA	NA	32760	0.046248	696	NA	NA	B037	0.996482	768540	6	gltA,pgm,porA	aspA,glnA,glyA,tkt,uncA,fn_gyrA	100	98.7417	454.358	64	22	100	100	817	94	16	2526	11	3	3	3	8335	B037___64___22___100___100___817___94___16___2526___11	additional strain
NA	B037	NA	NA	NA	NA	NA	NA	NA	NA	NA	NA	NA	NA	NA	NA	NA	NA	NA	NA	NA	33960	0.036948	708	NA	NA	B037	0.995603	605488	6	gltA,porA,fn_gyrA	aspA,glnA,glyA,pgm,tkt,uncA	100	93.84	442.29	64	22	85	98	652	270	60	4439	380	5	3	3	7831	B037___64___22___85___98___652___270___60___4439___380	additional strain
NA	B037	NA	NA	NA	NA	NA	NA	NA	NA	NA	NA	NA	NA	NA	NA	NA	NA	NA	NA	NA	33933	0.036757	701	NA	NA	B037	0.997739	1025884	8	gltA	aspA,glnA,glyA,pgm,tkt,uncA,porA,fn_gyrA	100	98.8388	490.899	64	22	85	98	134	101	16	2367	11	6	6	2	7805	B037___64___22___85___98___134___101___16___2367___11	additional strain
NA	B037	NA	NA	NA	NA	NA	NA	NA	NA	NA	NA	NA	NA	NA	NA	NA	NA	NA	NA	NA	78910	0.03601	865	NA	NA	B037	0.996901	1000871	8	porA	aspA,glnA,gltA,glyA,pgm,tkt,uncA,fn_gyrA	100	95.3875	426.07	64	133	20	100	134	160	16	3122	11	7	6	2	6390	B037___64___133___20___100___134___160___16___3122___11	additional strain
NA	B037	NA	NA	NA	NA	NA	NA	NA	NA	NA	NA	NA	NA	NA	NA	NA	NA	NA	NA	NA	34080	0.023306	717	NA	NA	B037	0.995938	372972	7	tkt,porA	aspA,glnA,gltA,glyA,pgm,uncA,fn_gyrA	99.9657	96.4157	392.703	64	22	71	100	134	187	60	2535	152	17	5	2	7851	B037___64___22___71___100___134___187___60___2535___152	additional strain
NA	B037	NA	NA	NA	NA	NA	NA	NA	NA	NA	NA	NA	NA	NA	NA	NA	NA	NA	NA	NA	B338-070621-02	0.015568	992	NA	NA	B037	0.999832	994498	9		aspA,glnA,gltA,glyA,pgm,tkt,uncA,porA,fn_gyrA	100	100	448.793	64	226	203	189	652	54	16	2367	11	22	7	2	11379	B037___64___226___203___189___652___54___16___2367___11	additional strain
NA	B038	NA	NA	NA	NA	NA	NA	NA	NA	NA	NA	NA	NA	NA	NA	NA	NA	NA	NA	NA	B051-180619-02	0.175225	973	NA	NA	21-B038	0.999539	650662	8	aspA	glnA,gltA,glyA,pgm,tkt,uncA,porA,fn_gyrA	100	98.2288	477.192	18	81	68	143	134	153	16	479	11	2	1	7	10815	B038___18___81___68___143___134___153___16___479___11	additional strain
NA	B039	NA	NA	NA	NA	NA	NA	NA	NA	NA	NA	NA	NA	NA	NA	NA	NA	NA	NA	NA	22260	0.029092	439	NA	NA	21-B039	0.996178	2844560	7	tkt,porA	aspA,glnA,gltA,glyA,pgm,uncA,fn_gyrA	100	98.07	439.709	64	22	212	100	134	233	16	1157	11	2	5	2	2491	B039___64___22___212___100___134___233___16___1157___11	additional strain
NA	B039	NA	NA	NA	NA	NA	NA	NA	NA	NA	NA	NA	NA	NA	NA	NA	NA	NA	NA	NA	33933	0.021878	701	NA	NA	21-B039	0.99517	2258104	7	gltA,porA	aspA,glnA,glyA,pgm,tkt,uncA,fn_gyrA	100	89.8786	363.572	64	22	85	98	134	101	16	2367	11	3	5	2	7805	B039___64___22___85___98___134___101___16___2367___11	additional strain
NA	B039	NA	NA	NA	NA	NA	NA	NA	NA	NA	NA	NA	NA	NA	NA	NA	NA	NA	NA	NA	B040F-110619-01	0.014901	515	NA	NA	21-B039	0.994078	127372	5	gltA,pgm,tkt,fn_gyrA	aspA,glnA,glyA,uncA,porA	100	99.462	478.615	258	174	207	193	336	314	131	2347	99	5	0	5	11002	B039___258___174___207___193___336___314___131___2347___99	additional strain
NA	B039	NA	NA	NA	NA	NA	NA	NA	NA	NA	NA	NA	NA	NA	NA	NA	NA	NA	NA	NA	110223	0.010916	598	NA	NA	21-B039	0.99517	1727734	6	glyA,pgm,porA	aspA,glnA,gltA,tkt,uncA,fn_gyrA	100	91.115	348.386	64	22	203	351	514	229	16	4549	11	8	4	2	11119	B039___64___22___203___351___514___229___16___4549___11	additional strain
NA	B050	NA	NA	NA	NA	NA	NA	NA	NA	NA	NA	NA	NA	NA	NA	NA	NA	NA	NA	NA	B113-130819-02	0.039874	515	NA	NA	B050	0.995336	319416	9		aspA,glnA,gltA,glyA,pgm,tkt,uncA,porA,fn_gyrA	100	100	445.257	258	174	207	193	336	314	229	2347	99	3	0	9	7836	B050___258___174___207___193___336___314___229___2347___99	additional strain
NA	B051	NA	NA	NA	NA	NA	NA	NA	NA	NA	NA	NA	NA	NA	NA	NA	NA	NA	NA	NA	B121-270819-02	0.292628	435	NA	NA	21-B051	0.999749	466481	9		aspA,glnA,gltA,glyA,pgm,tkt,uncA,porA,fn_gyrA	100	99.3356	490.219	64	105	20	77	94	103	16	1634	11	2	2	7	6591	B051___64___105___20___77___94___103___16___1634___11	additional strain
NA	B052	NA	NA	NA	NA	NA	NA	NA	NA	NA	NA	NA	NA	NA	NA	NA	NA	NA	NA	NA	B338-070621-02	0.423486	992	NA	NA	21-B052	0.999874	2200803	9		aspA,glnA,gltA,glyA,pgm,tkt,uncA,porA,fn_gyrA	100	100	490.234	64	226	203	189	652	54	16	2367	11	1	0	9	11379	B052___64___226___203___189___652___54___16___2367___11	additional strain
NA	B052	NA	NA	NA	NA	NA	NA	NA	NA	NA	NA	NA	NA	NA	NA	NA	NA	NA	NA	NA	78916	0.073508	867	NA	NA	21-B052	0.999496	1038261	9		aspA,glnA,gltA,glyA,pgm,tkt,uncA,porA,fn_gyrA	100	97.3967	454.316	64	95	20	100	514	101	60	1157	11	3	3	6	6427	B052___64___95___20___100___514___101___60___1157___11	additional strain
NA	B052	NA	NA	NA	NA	NA	NA	NA	NA	NA	NA	NA	NA	NA	NA	NA	NA	NA	NA	NA	33933	0.016303	701	NA	NA	21-B052	0.998322	1900600	8	gltA	aspA,glnA,glyA,pgm,tkt,uncA,porA,fn_gyrA	100	96.3512	463.086	64	22	85	98	134	101	16	2367	11	4	6	2	7805	B052___64___22___85___98___134___101___16___2367___11	additional strain
NA	B052	NA	NA	NA	NA	NA	NA	NA	NA	NA	NA	NA	NA	NA	NA	NA	NA	NA	NA	NA	B038-110619-01	0.010227	514	NA	NA	21-B052	0.999538	1490281	9		aspA,glnA,gltA,glyA,pgm,tkt,uncA,porA,fn_gyrA	100	98.2789	424.243	64	22	20	100	134	301	16	391	104	12	6	3	10818	B052___64___22___20___100___134___301___16___391___104	additional strain
NA	B054	NA	NA	NA	NA	NA	NA	NA	NA	NA	NA	NA	NA	NA	NA	NA	NA	NA	NA	NA	B112-130819-01	0.891668	976	NA	NA	B054	1	5892726	9		aspA,glnA,gltA,glyA,pgm,tkt,uncA,porA,fn_gyrA	100	100	493.643	64	583	22	111	122	303	16	2357	36	1	0	9	7882	B054___64___583___22___111___122___303___16___2357___36	additional strain
NA	B063	NA	NA	NA	NA	NA	NA	NA	NA	NA	NA	NA	NA	NA	NA	NA	NA	NA	NA	NA	IN_Cj_FI_143_innuendo	0.296705	44	NA	NA	21-B063	0.999874	3654386	9		aspA,glnA,gltA,glyA,pgm,tkt,uncA,porA,fn_gyrA	100	100	488.284	4	7	10	4	42	51	1	44	1	1	0	9	583	B063___4___7___10___4___42___51___1___44___1	additional strain
NA	B063	NA	NA	NA	NA	NA	NA	NA	NA	NA	NA	NA	NA	NA	NA	NA	NA	NA	NA	NA	61375	0.17443	28	NA	NA	21-B063	0.999413	3859892	9		aspA,glnA,gltA,glyA,pgm,tkt,uncA,porA,fn_gyrA	99.9556	94.4789	532.441	4	7	10	4	1	7	300	44	7	2	6	3	4529	B063___4___7___10___4___1___7___300___44___7	additional strain
NA	B067	NA	NA	NA	NA	NA	NA	NA	NA	NA	NA	NA	NA	NA	NA	NA	NA	NA	NA	NA	B300-140421-01	0.607032	303	NA	NA	21-B067	0.99727	5382798	9		aspA,glnA,gltA,glyA,pgm,tkt,uncA,porA,fn_gyrA	100	100	491.499	10	2	107	137	120	76	1	130	74	1	0	9	1080	B067___10___2___107___137___120___76___1___130___74	additional strain
NA	B067	NA	NA	NA	NA	NA	NA	NA	NA	NA	NA	NA	NA	NA	NA	NA	NA	NA	NA	NA	84804	0.013204	912	NA	NA	21-B067	0.990215	586633	7	gltA,uncA	aspA,glnA,glyA,pgm,tkt,porA,fn_gyrA	99.93	83.2329	550.463	17	2	9	5	8	2	21	3341	80	4	2	5	9592	B067___17___2___9___5___8___2___21___3341___80	additional strain
NA	B068	NA	NA	NA	NA	NA	NA	NA	NA	NA	NA	NA	NA	NA	NA	NA	NA	NA	NA	NA	61375	0.048335	28	NA	NA	21-B068	0.998951	1778150	9		aspA,glnA,gltA,glyA,pgm,tkt,uncA,porA,fn_gyrA	99.9611	91.1767	390.037	4	7	10	4	1	7	300	44	7	2	6	3	4529	B068___4___7___10___4___1___7___300___44___7	additional strain
NA	B076	NA	NA	NA	NA	NA	NA	NA	NA	NA	NA	NA	NA	NA	NA	NA	NA	NA	NA	NA	B067-020719-01	0.947839	44	NA	NA	21-B076	0.999622	4999472	9		aspA,glnA,gltA,glyA,pgm,tkt,uncA,porA,fn_gyrA	100	100	489.292	4	7	12	4	42	51	1	73	1	1	0	9	383	B076___4___7___12___4___42___51___1___73___1	additional strain
NA	B077	NA	NA	NA	NA	NA	NA	NA	NA	NA	NA	NA	NA	NA	NA	NA	NA	NA	NA	NA	B067-020719-01	0.95167	44	NA	NA	21-B077	0.999664	5658226	9		aspA,glnA,gltA,glyA,pgm,tkt,uncA,porA,fn_gyrA	100	100	489.358	4	7	12	4	42	51	1	73	1	1	0	9	383	B077___4___7___12___4___42___51___1___73___1	additional strain
NA	B078	NA	NA	NA	NA	NA	NA	NA	NA	NA	NA	NA	NA	NA	NA	NA	NA	NA	NA	NA	B067-020719-01	0.939791	44	NA	NA	21-B078	0.999832	3360253	9		aspA,glnA,gltA,glyA,pgm,tkt,uncA,porA,fn_gyrA	100	100	489.22	4	7	12	4	42	51	1	73	1	1	0	9	383	B078___4___7___12___4___42___51___1___73___1	additional strain
NA	B080	NA	NA	NA	NA	NA	NA	NA	NA	NA	NA	NA	NA	NA	NA	NA	NA	NA	NA	NA	B067-020719-01	0.946823	44	NA	NA	21-B080	0.999707	3207222	9		aspA,glnA,gltA,glyA,pgm,tkt,uncA,porA,fn_gyrA	100	100	489.236	4	7	12	4	42	51	1	73	1	1	0	9	383	B080___4___7___12___4___42___51___1___73___1	additional strain
NA	B082	NA	NA	NA	NA	NA	NA	NA	NA	NA	NA	NA	NA	NA	NA	NA	NA	NA	NA	NA	B067-020719-01	0.948695	44	NA	NA	21-B082	0.999622	1798330	9		aspA,glnA,gltA,glyA,pgm,tkt,uncA,porA,fn_gyrA	100	100	489.381	4	7	12	4	42	51	1	73	1	1	0	9	383	B082___4___7___12___4___42___51___1___73___1	additional strain
NA	B103	NA	NA	NA	NA	NA	NA	NA	NA	NA	NA	NA	NA	NA	NA	NA	NA	NA	NA	NA	B067-020719-01	0.928694	44	NA	NA	21-B103	0.999916	3072627	9		aspA,glnA,gltA,glyA,pgm,tkt,uncA,porA,fn_gyrA	100	100	489.268	4	7	12	4	42	51	1	73	1	1	0	9	383	B103___4___7___12___4___42___51___1___73___1	additional strain
NA	B103	NA	NA	NA	NA	NA	NA	NA	NA	NA	NA	NA	NA	NA	NA	NA	NA	NA	NA	NA	B063-020719-01	0.01575	117	NA	NA	21-B103	0.996772	80410	8	glnA	aspA,gltA,glyA,pgm,tkt,uncA,porA,fn_gyrA	100	95.0312	407.096	17	2	670	5	8	2	4	236	31	3	6	2	11384	B103___17___2___670___5___8___2___4___236___31	additional strain
NA	B155	NA	NA	NA	NA	NA	NA	NA	NA	NA	NA	NA	NA	NA	NA	NA	NA	NA	NA	NA	107681	0.319668	180	NA	NA	21-B155	0.997185	3537642	9		aspA,glnA,gltA,glyA,pgm,tkt,uncA,porA,fn_gyrA	100	100	491.651	37	52	57	26	127	29	23	819	4	1	0	9	692	B155___37___52___57___26___127___29___23___819___4	additional strain
NA	B155	NA	NA	NA	NA	NA	NA	NA	NA	NA	NA	NA	NA	NA	NA	NA	NA	NA	NA	NA	90014	0.114877	221	NA	NA	21-B155	0.993825	2665028	9		aspA,glnA,gltA,glyA,pgm,tkt,uncA,porA,fn_gyrA	100	93.2567	417.234	37	52	57	26	127	29	23	884	28	4	7	2	692	B155___37___52___57___26___127___29___23___884___28	additional strain
NA	B189	NA	NA	NA	NA	NA	NA	NA	NA	NA	NA	NA	NA	NA	NA	NA	NA	NA	NA	NA	B183-300720-01	0.611868	319	NA	NA	B189	0.993828	10731339	9		aspA,glnA,gltA,glyA,pgm,tkt,uncA,porA,fn_gyrA	100	100	488.214	48	7	10	4	1	7	1	217	7	1	0	9	11	B189___48___7___10___4___1___7___1___217___7	additional strain
NA	B190	NA	NA	NA	NA	NA	NA	NA	NA	NA	NA	NA	NA	NA	NA	NA	NA	NA	NA	NA	B114-130819-03	0.469573	979	NA	NA	21-B190	0.99958	2142462	9		aspA,glnA,gltA,glyA,pgm,tkt,uncA,porA,fn_gyrA	100	100	493.055	96	135	99	136	183	140	113	2359	105	1	0	9	1277	B190___96___135___99___136___183___140___113___2359___105	additional strain
NA	B190	NA	NA	NA	NA	NA	NA	NA	NA	NA	NA	NA	NA	NA	NA	NA	NA	NA	NA	NA	B333-250521-01	0.371994	989	NA	NA	21-B190	0.997313	752195	4	gltA,glyA,pgm,tkt,porA	aspA,glnA,uncA,fn_gyrA	100	97.2225	451.235	98	122	98	891	180	150	113	970	101	2	1	3	11377	B190___98___122___98___891___180___150___113___970___101	additional strain
NA	B198	NA	NA	NA	NA	NA	NA	NA	NA	NA	NA	NA	NA	NA	NA	NA	NA	NA	NA	NA	B189-130820-01	0.997374	181	NA	NA	21-B198	0.999916	2522676	9		aspA,glnA,gltA,glyA,pgm,tkt,uncA,porA,fn_gyrA	100	100	492.2	2	1	4	28	58	672	58	6	36	1	0	9	8614	B198___2___1___4___28___58___672___58___6___36	additional strain
NA	B221	NA	NA	NA	NA	NA	NA	NA	NA	NA	NA	NA	NA	NA	NA	NA	NA	NA	NA	NA	48443	0.24445	759	NA	NA	21-B221	0.992858	1656025	7	gltA,porA	aspA,glnA,glyA,pgm,tkt,uncA,fn_gyrA	100	100	485.175	2	59	4	48	131	24	57	180	13	1	0	7	2349	B221___2___59___4___48___131___24___57___180___13	additional strain
NA	B326	NA	NA	NA	NA	NA	NA	NA	NA	NA	NA	NA	NA	NA	NA	NA	NA	NA	NA	NA	B321-050521-01	0.419355	987	NA	NA	B326	0.999916	1443315	9		aspA,glnA,gltA,glyA,pgm,tkt,uncA,porA,fn_gyrA	100	100	494.367	64	33	78	18	1136	86	16	1598	11	1	0	9	11383	B326___64___33___78___18___1136___86___16___1598___11	additional strain
NA	B326	NA	NA	NA	NA	NA	NA	NA	NA	NA	NA	NA	NA	NA	NA	NA	NA	NA	NA	NA	B029-110619-02	0.134743	379	NA	NA	B326	0.999916	317344	9		aspA,glnA,gltA,glyA,pgm,tkt,uncA,porA,fn_gyrA	100	98.3278	452.828	61	70	22	18	2	74	47	860	31	3	2	7	448	B326___61___70___22___18___2___74___47___860___31	additional strain
NA	B329	NA	NA	NA	NA	NA	NA	NA	NA	NA	NA	NA	NA	NA	NA	NA	NA	NA	NA	NA	42532	0.012974	467	NA	NA	B329	0.993699	61348	3	aspA,glyA,pgm,tkt,uncA,porA	glnA,gltA,fn_gyrA	100	95.46	345.579	26	2	9	51	8	46	21	361	80	2	1	2	682	B329___26___2___9___51___8___46___21___361___80	additional strain
NA	B331	NA	NA	NA	NA	NA	NA	NA	NA	NA	NA	NA	NA	NA	NA	NA	NA	NA	NA	NA	B046-180619-01	0.768275	101	NA	NA	B331	0.999916	4855265	9		aspA,glnA,gltA,glyA,pgm,tkt,uncA,porA,fn_gyrA	100	100	491.782	10	81	50	99	120	76	52	276	19	1	0	9	677	B331___10___81___50___99___120___76___52___276___19	additional strain
NA	B331	NA	NA	NA	NA	NA	NA	NA	NA	NA	NA	NA	NA	NA	NA	NA	NA	NA	NA	NA	56924	0.087819	44	NA	NA	B331	0.998657	457452	6	gltA,pgm,fn_gyrA	aspA,glnA,glyA,tkt,uncA,porA	100	100	489.733	4	7	41	4	42	7	1	217	47	2	0	6	230	B331___4___7___41___4___42___7___1___217___47	additional strain
NA	B335	NA	NA	NA	NA	NA	NA	NA	NA	NA	NA	NA	NA	NA	NA	NA	NA	NA	NA	NA	59179	0.147219	809	NA	NA	B335	0.999833	592650	7	tkt,porA	aspA,glnA,gltA,glyA,pgm,uncA,fn_gyrA	100	100	472.704	64	467	71	100	134	101	16	2846	11	2	4	3	6592	B335___64___467___71___100___134___101___16___2846___11	additional strain
NA	B335	NA	NA	NA	NA	NA	NA	NA	NA	NA	NA	NA	NA	NA	NA	NA	NA	NA	NA	NA	B321-050521-01	0.115187	987	NA	NA	B335	1	501980	9		aspA,glnA,gltA,glyA,pgm,tkt,uncA,porA,fn_gyrA	100	97.0122	482.831	64	33	78	18	1136	86	16	1598	11	3	3	6	11383	B335___64___33___78___18___1136___86___16___1598___11	additional strain
NA	B335	NA	NA	NA	NA	NA	NA	NA	NA	NA	NA	NA	NA	NA	NA	NA	NA	NA	NA	NA	B338-070621-02	0.053311	992	NA	NA	B335	0.999749	533310	9		aspA,glnA,gltA,glyA,pgm,tkt,uncA,porA,fn_gyrA	100	98.4378	469.766	64	226	203	189	652	54	16	2367	11	4	4	5	11379	B335___64___226___203___189___652___54___16___2367___11	additional strain
NA	B335	NA	NA	NA	NA	NA	NA	NA	NA	NA	NA	NA	NA	NA	NA	NA	NA	NA	NA	NA	B050-180619-01	0.052584	972	NA	NA	B335	0.999916	588077	9		aspA,glnA,gltA,glyA,pgm,tkt,uncA,porA,fn_gyrA	100	89.7767	458.981	64	22	148	100	94	187	16	2351	11	5	5	4	10813	B335___64___22___148___100___94___187___16___2351___11	additional strain
NA	B335	NA	NA	NA	NA	NA	NA	NA	NA	NA	NA	NA	NA	NA	NA	NA	NA	NA	NA	NA	B320-050521-02	0.031113	285	NA	NA	B335	0.999163	542595	8	fn_gyrA	aspA,glnA,gltA,glyA,pgm,tkt,uncA,porA	100	93.7075	469.811	64	22	20	100	242	204	16	1795	37	6	5	3	4570	B335___64___22___20___100___242___204___16___1795___37	additional strain
NA	B335	NA	NA	NA	NA	NA	NA	NA	NA	NA	NA	NA	NA	NA	NA	NA	NA	NA	NA	NA	22260	0.010009	439	NA	NA	B335	0.998787	675788	8	tkt	aspA,glnA,gltA,glyA,pgm,uncA,porA,fn_gyrA	100	98.5563	486.319	64	22	212	100	134	233	16	1157	11	11	6	2	2491	B335___64___22___212___100___134___233___16___1157___11	additional strain
NA	B336	NA	NA	NA	NA	NA	NA	NA	NA	NA	NA	NA	NA	NA	NA	NA	NA	NA	NA	NA	50477	0.071266	474	NA	NA	B336	0.999874	798093	8	gltA	aspA,glnA,glyA,pgm,tkt,uncA,porA,fn_gyrA	100	97.8512	481.925	277	105	20	143	134	54	16	348	11	3	3	5	6451	B336___277___105___20___143___134___54___16___348___11	additional strain
NA	B336	NA	NA	NA	NA	NA	NA	NA	NA	NA	NA	NA	NA	NA	NA	NA	NA	NA	NA	NA	42069	0.0151	285	NA	NA	B336	0.996402	750632	7	glyA,porA	aspA,glnA,gltA,pgm,tkt,uncA,fn_gyrA	100	95.7714	382.824	64	22	22	100	134	103	16	4468	11	6	5	2	7872	B336___64___22___22___100___134___103___16___4468___11	additional strain
NA	B336	NA	NA	NA	NA	NA	NA	NA	NA	NA	NA	NA	NA	NA	NA	NA	NA	NA	NA	NA	B038-110619-03	0.0118	970	NA	NA	B336	0.994268	23519	6	pgm,tkt,porA	aspA,glnA,gltA,glyA,uncA,fn_gyrA	100	89.0133	288.907	258	174	154	193	336	421	131	2354	103	7	0	6	10817	B336___258___174___154___193___336___421___131___2354___103	additional strain
NA	B336	NA	NA	NA	NA	NA	NA	NA	NA	NA	NA	NA	NA	NA	NA	NA	NA	NA	NA	NA	107381	0.011565	562	NA	NA	B336	0.996402	549891	7	glyA,uncA	aspA,glnA,gltA,pgm,tkt,porA,fn_gyrA	100	95.5071	410.071	76	22	212	614	134	54	560	348	11	8	5	2	8808	B336___76___22___212___614___134___54___560___348___11	additional strain
NA	B337	NA	NA	NA	NA	NA	NA	NA	NA	NA	NA	NA	NA	NA	NA	NA	NA	NA	NA	NA	B321-050521-01	0.080634	987	NA	NA	B337	1	118670	8	pgm	aspA,glnA,gltA,glyA,tkt,uncA,porA,fn_gyrA	100	92.9213	422.276	64	33	78	18	1136	86	16	1598	11	2	0	8	11383	B337___64___33___78___18___1136___86___16___1598___11	additional strain
NA	B337	NA	NA	NA	NA	NA	NA	NA	NA	NA	NA	NA	NA	NA	NA	NA	NA	NA	NA	NA	50656	0.040636	475	NA	NA	B337	0.999958	68658	9		aspA,glnA,gltA,glyA,pgm,tkt,uncA,porA,fn_gyrA	100	97.8644	396.998	27	22	22	104	115	86	31	680	39	3	1	8	8368	B337___27___22___22___104___115___86___31___680___39	additional strain
NA	B338	NA	NA	NA	NA	NA	NA	NA	NA	NA	NA	NA	NA	NA	NA	NA	NA	NA	NA	NA	B321-050521-01	0.206055	987	NA	NA	B338	0.999958	1534667	9		aspA,glnA,gltA,glyA,pgm,tkt,uncA,porA,fn_gyrA	100	100	489.99	64	33	78	18	1136	86	16	1598	11	2	3	6	11383	B338___64___33___78___18___1136___86___16___1598___11	additional strain
NA	B338	NA	NA	NA	NA	NA	NA	NA	NA	NA	NA	NA	NA	NA	NA	NA	NA	NA	NA	NA	33958	0.021749	707	NA	NA	B338	0.999161	1367221	6	tkt,uncA,porA	aspA,glnA,gltA,glyA,pgm,fn_gyrA	100	100	450.544	64	288	203	189	134	94	60	1603	11	3	4	2	7820	B338___64___288___203___189___134___94___60___1603___11	additional strain
NA	B338	NA	NA	NA	NA	NA	NA	NA	NA	NA	NA	NA	NA	NA	NA	NA	NA	NA	NA	NA	34690	0.014489	719	NA	NA	B338	0.998364	797714	5	aspA,glyA,tkt,porA	glnA,gltA,pgm,uncA,fn_gyrA	100	100	412.621	216	22	85	142	134	101	16	2372	11	4	3	2	8769	B338___216___22___85___142___134___101___16___2372___11	additional strain
NA	B342	NA	NA	NA	NA	NA	NA	NA	NA	NA	NA	NA	NA	NA	NA	NA	NA	NA	NA	NA	34524	0.858237	33	NA	NA	B342	1	4077625	8	pgm	aspA,glnA,gltA,glyA,tkt,uncA,porA,fn_gyrA	100	100	491.138	8	10	2	2	11	12	6	957	8	1	0	8	354	B342___8___10___2___2___11___12___6___957___8	additional strain
NA	B345	NA	NA	NA	NA	NA	NA	NA	NA	NA	NA	NA	NA	NA	NA	NA	NA	NA	NA	NA	B325-250521-01	0.116372	117	NA	NA	B345	0.995844	899277	9		aspA,glnA,gltA,glyA,pgm,tkt,uncA,porA,fn_gyrA	100	100	481.9	17	5	8	5	8	2	4	909	31	2	0	9	563	B345___17___5___8___5___8___2___4___909___31	additional strain
NA	B354	NA	NA	NA	NA	NA	NA	NA	NA	NA	NA	NA	NA	NA	NA	NA	NA	NA	NA	NA	B046-180619-01	0.05796	101	NA	NA	B354	0.999542	24510	9		aspA,glnA,gltA,glyA,pgm,tkt,uncA,porA,fn_gyrA	100	86.5667	406.264	10	81	50	99	120	76	52	276	19	2	0	9	677	B354___10___81___50___99___120___76___52___276___19	additional strain
NA	B355	NA	NA	NA	NA	NA	NA	NA	NA	NA	NA	NA	NA	NA	NA	NA	NA	NA	NA	NA	62524	0.025196	292	NA	NA	B355	0.999202	110069	9		aspA,glnA,gltA,glyA,pgm,tkt,uncA,porA,fn_gyrA	100	97.8589	384.095	35	43	8	51	8	2	21	634	31	3	0	9	2162	B355___35___43___8___51___8___2___21___634___31	additional strain
NA	B358	NA	NA	NA	NA	NA	NA	NA	NA	NA	NA	NA	NA	NA	NA	NA	NA	NA	NA	NA	107933	0.174575	44	NA	NA	B358	0.999874	2366560	8	fn_gyrA	aspA,glnA,gltA,glyA,pgm,tkt,uncA,porA	100	98.845	480.084	4	7	40	4	42	51	1	73	288	2	5	3	267	B358___4___7___40___4___42___51___1___73___288	additional strain
NA	B362	NA	NA	NA	NA	NA	NA	NA	NA	NA	NA	NA	NA	NA	NA	NA	NA	NA	NA	NA	B046-180619-01	0.100946	101	NA	NA	B362	0.999958	200254	9		aspA,glnA,gltA,glyA,pgm,tkt,uncA,porA,fn_gyrA	100	99.89	461.054	10	81	50	99	120	76	52	276	19	2	0	9	677	B362___10___81___50___99___120___76___52___276___19	additional strain
NA	W022	NA	NA	NA	NA	NA	NA	NA	NA	NA	NA	NA	NA	NA	NA	NA	NA	NA	NA	NA	42540	0.503776	174	NA	NA	W022	0.998572	2627421	9		aspA,glnA,gltA,glyA,pgm,tkt,uncA,porA,fn_gyrA	100	100	489.149	35	43	9	5	121	46	21	468	80	1	0	9	683	W022___35___43___9___5___121___46___21___468___80	additional strain
NA	W022	NA	NA	NA	NA	NA	NA	NA	NA	NA	NA	NA	NA	NA	NA	NA	NA	NA	NA	NA	94139	0.029887	949	NA	NA	W022	0.990679	282618	5	gltA,pgm,porA,fn_gyrA	aspA,glnA,glyA,tkt,uncA	99.944	87.018	161.294	4	7	10	5	2	7	1	11	10	7	2	3	11044	W022___4___7___10___5___2___7___1___11___10	additional strain
NA	W026	NA	NA	NA	NA	NA	NA	NA	NA	NA	NA	NA	NA	NA	NA	NA	NA	NA	NA	NA	107681	0.172049	180	NA	NA	W026	0.998744	352310	9		aspA,glnA,gltA,glyA,pgm,tkt,uncA,porA,fn_gyrA	100	100	483.491	37	52	57	26	127	29	23	819	4	1	0	9	692	W026___37___52___57___26___127___29___23___819___4	additional strain
NA	W026	NA	NA	NA	NA	NA	NA	NA	NA	NA	NA	NA	NA	NA	NA	NA	NA	NA	NA	NA	78944	0.051663	116	NA	NA	W026	0.999372	64594	8	glyA	aspA,glnA,gltA,pgm,tkt,uncA,porA,fn_gyrA	100	83.3838	341.233	2	29	4	48	13	24	57	819	13	5	3	5	693	W026___2___29___4___48___13___24___57___819___13	additional strain
NA	W052	NA	NA	NA	NA	NA	NA	NA	NA	NA	NA	NA	NA	NA	NA	NA	NA	NA	NA	NA	107502	0.682895	408	NA	NA	W052	0.999665	2135215	9		aspA,glnA,gltA,glyA,pgm,tkt,uncA,porA,fn_gyrA	100	100	486.29	2	29	84	48	131	25	57	188	4	1	0	9	996	W052___2___29___84___48___131___25___57___188___4	additional strain
NA	W053	NA	NA	NA	NA	NA	NA	NA	NA	NA	NA	NA	NA	NA	NA	NA	NA	NA	NA	NA	112078	0.074039	424	NA	NA	W053	0.999754	23510	8	aspA	glnA,gltA,glyA,pgm,tkt,uncA,porA,fn_gyrA	100	92.9013	350.66	1	7	10	349	261	7	1	2027	7	3	0	8	3904	W053___1___7___10___349___261___7___1___2027___7	additional strain
NA	W053	NA	NA	NA	NA	NA	NA	NA	NA	NA	NA	NA	NA	NA	NA	NA	NA	NA	NA	NA	107481	0.067755	117	NA	NA	W053	0.99959	60475	8	porA	aspA,glnA,gltA,glyA,pgm,tkt,uncA,fn_gyrA	100	100	426.081	17	2	8	5	8	2	4	4477	31	5	1	7	177	W053___17___2___8___5___8___2___4___4477___31	additional strain
NA	W054	NA	NA	NA	NA	NA	NA	NA	NA	NA	NA	NA	NA	NA	NA	NA	NA	NA	NA	NA	100884	0.09586	225	NA	NA	W054	0.998918	41435	7	uncA,porA	aspA,glnA,gltA,glyA,pgm,tkt,fn_gyrA	100	100	414.285	17	2	8	5	8	2	4	4123	31	2	1	6	177	W054___17___2___8___5___8___2___4___4123___31	additional strain
NA	W054	NA	NA	NA	NA	NA	NA	NA	NA	NA	NA	NA	NA	NA	NA	NA	NA	NA	NA	NA	42534	0.043057	117	NA	NA	W054	0.999126	37584	8	uncA	aspA,glnA,gltA,glyA,pgm,tkt,porA,fn_gyrA	99.9688	92.81	412.277	17	5	8	5	8	2	4	2648	31	6	6	2	563	W054___17___5___8___5___8___2___4___2648___31	additional strain
NA	W054	NA	NA	NA	NA	NA	NA	NA	NA	NA	NA	NA	NA	NA	NA	NA	NA	NA	NA	NA	94139	0.039752	949	NA	NA	W054	0.990347	12703	4	glnA,pgm,tkt,porA,fn_gyrA	aspA,gltA,glyA,uncA	99.945	98.1875	286.802	4	7	10	5	2	7	1	11	10	9	1	3	11044	W054___4___7___10___5___2___7___1___11___10	additional strain
NA	W078	NA	NA	NA	NA	NA	NA	NA	NA	NA	NA	NA	NA	NA	NA	NA	NA	NA	NA	NA	57334	0.0914	28	NA	NA	W078	0.998877	79612	9		aspA,glnA,gltA,glyA,pgm,tkt,uncA,porA,fn_gyrA	100	100	435.504	4	7	10	4	1	7	1	217	80	2	0	9	45	W078___4___7___10___4___1___7___1___217___80	additional strain
NA	W079	NA	NA	NA	NA	NA	NA	NA	NA	NA	NA	NA	NA	NA	NA	NA	NA	NA	NA	NA	B113-130819-01	0.251267	977	NA	NA	W079	0.999917	250667	9		aspA,glnA,gltA,glyA,pgm,tkt,uncA,porA,fn_gyrA	100	100	462.476	64	70	68	97	122	106	16	127	36	1	0	9	801	W079___64___70___68___97___122___106___16___127___36	additional strain
NA	W079	NA	NA	NA	NA	NA	NA	NA	NA	NA	NA	NA	NA	NA	NA	NA	NA	NA	NA	NA	51015	0.120274	780	NA	NA	W079	0.99879	92171	7	porA,fn_gyrA	aspA,glnA,gltA,glyA,pgm,tkt,uncA	100	98.4429	399.706	2	1	5	3	2	1	5	2756	1	2	0	7	19	W079___2___1___5___3___2___1___5___2756___1	additional strain
NA	W081	NA	NA	NA	NA	NA	NA	NA	NA	NA	NA	NA	NA	NA	NA	NA	NA	NA	NA	NA	42534	0.116959	117	NA	NA	W081	0.997701	220552	6	glnA,gltA,porA	aspA,glyA,pgm,tkt,uncA,fn_gyrA	100	100	461.818	17	5	8	5	8	2	4	2648	31	2	0	6	563	W081___17___5___8___5___8___2___4___2648___31	additional strain
NA	W081	NA	NA	NA	NA	NA	NA	NA	NA	NA	NA	NA	NA	NA	NA	NA	NA	NA	NA	NA	92360	0.054456	467	NA	NA	W081	0.996281	187034	5	aspA,glyA,tkt,uncA	glnA,gltA,pgm,porA,fn_gyrA	100	100	480.365	35	2	9	432	8	46	21	728	31	7	3	2	5128	W081___35___2___9___432___8___46___21___728___31	additional strain
NA	W082	NA	NA	NA	NA	NA	NA	NA	NA	NA	NA	NA	NA	NA	NA	NA	NA	NA	NA	NA	B037-110619-01	0.062382	63	NA	NA	W082	0.995053	53546	9		aspA,glnA,gltA,glyA,pgm,tkt,uncA,porA,fn_gyrA	100	100	367.727	4	7	10	4	1	7	1	49	7	7	5	4	45	W082___4___7___10___4___1___7___1___49___7	additional strain
NA	W083	NA	NA	NA	NA	NA	NA	NA	NA	NA	NA	NA	NA	NA	NA	NA	NA	NA	NA	NA	94139	0.037057	949	NA	NA	W083	0.991436	13672	4	gltA,pgm,tkt,porA,fn_gyrA	aspA,glnA,glyA,uncA	100	88.155	227.438	4	7	10	5	2	7	1	11	10	7	0	4	11044	W083___4___7___10___5___2___7___1___11___10	additional strain
NA	W083	NA	NA	NA	NA	NA	NA	NA	NA	NA	NA	NA	NA	NA	NA	NA	NA	NA	NA	NA	57583	0.033266	482	NA	NA	W083	0.991189	7115	3	glnA,gltA,glyA,pgm,tkt,uncA	aspA,porA,fn_gyrA	100	78.88	299.567	64	22	164	98	123	101	60	1634	11	9	1	2	8845	W083___64___22___164___98___123___101___60___1634___11	additional strain
NA	W083	NA	NA	NA	NA	NA	NA	NA	NA	NA	NA	NA	NA	NA	NA	NA	NA	NA	NA	NA	42085	0.032914	466	NA	NA	W083	0.994771	21781	7	aspA,uncA	glnA,gltA,glyA,pgm,tkt,porA,fn_gyrA	100	88.2143	300.682	27	2	22	104	43	86	31	270	31	10	2	5	1231	W083___27___2___22___104___43___86___31___270___31	additional strain
NA	W083	NA	NA	NA	NA	NA	NA	NA	NA	NA	NA	NA	NA	NA	NA	NA	NA	NA	NA	NA	107176	0.017631	398	NA	NA	W083	0.993	28294	7	uncA,porA	aspA,glnA,gltA,glyA,pgm,tkt,fn_gyrA	99.9671	99.5014	300.206	17	2	8	5	8	2	21	204	31	18	3	4	144	W083___17___2___8___5___8___2___21___204___31	additional strain
NA	W084	NA	NA	NA	NA	NA	NA	NA	NA	NA	NA	NA	NA	NA	NA	NA	NA	NA	NA	NA	42085	0.228619	466	NA	NA	W084	0.999166	237312	7	aspA,fn_gyrA	glnA,gltA,glyA,pgm,tkt,uncA,porA	100	100	484.422	27	2	22	104	43	86	31	270	31	1	0	7	1231	W084___27___2___22___104___43___86___31___270___31	additional strain
NA	W084	NA	NA	NA	NA	NA	NA	NA	NA	NA	NA	NA	NA	NA	NA	NA	NA	NA	NA	NA	31157	0.061993	693	NA	NA	W084	0.99433	37947	3	aspA,glyA,pgm,tkt,porA,fn_gyrA	glnA,gltA,uncA	100	99.9167	288.476	8	2	5	53	11	3	1	940	9	3	1	2	607	W084___8___2___5___53___11___3___1___940___9	additional strain
NA	W084	NA	NA	NA	NA	NA	NA	NA	NA	NA	NA	NA	NA	NA	NA	NA	NA	NA	NA	NA	94139	0.029716	949	NA	NA	W084	0.996748	13504	5	glnA,glyA,porA,fn_gyrA	aspA,gltA,pgm,tkt,uncA	100	96.16	269.92	4	7	10	5	2	7	1	11	10	10	2	3	11044	W084___4___7___10___5___2___7___1___11___10	additional strain
NA	W084	NA	NA	NA	NA	NA	NA	NA	NA	NA	NA	NA	NA	NA	NA	NA	NA	NA	NA	NA	51015	0.021367	780	NA	NA	W084	0.998291	15633	6	glyA,porA,fn_gyrA	aspA,glnA,gltA,pgm,tkt,uncA	100	94.4567	261.061	2	1	5	3	2	1	5	2756	1	14	2	4	19	W084___2___1___5___3___2___1___5___2756___1	additional strain
NA	W084	NA	NA	NA	NA	NA	NA	NA	NA	NA	NA	NA	NA	NA	NA	NA	NA	NA	NA	NA	108911	0.020685	413	NA	NA	W084	0.996498	199224	7	aspA,porA	glnA,gltA,glyA,pgm,tkt,uncA,fn_gyrA	100	94.2629	391.465	18	2	22	104	1	86	31	363	40	15	5	2	4069	W084___18___2___22___104___1___86___31___363___40	additional strain
NA	W087	NA	NA	NA	NA	NA	NA	NA	NA	NA	NA	NA	NA	NA	NA	NA	NA	NA	NA	NA	B339-070621-01	0.690076	44	NA	NA	W087	0.999958	1387262	9		aspA,glnA,gltA,glyA,pgm,tkt,uncA,porA,fn_gyrA	100	100	488.201	4	7	40	4	42	51	1	73	1	1	0	9	267	W087___4___7___40___4___42___51___1___73___1	additional strain
NA	W087	NA	NA	NA	NA	NA	NA	NA	NA	NA	NA	NA	NA	NA	NA	NA	NA	NA	NA	NA	B320-050521-02	0.07919	285	NA	NA	W087	0.999372	199976	9		aspA,glnA,gltA,glyA,pgm,tkt,uncA,porA,fn_gyrA	100	98.23	468.469	64	22	20	100	242	204	16	1795	37	2	1	8	4570	W087___64___22___20___100___242___204___16___1795___37	additional strain
NA	W087	NA	NA	NA	NA	NA	NA	NA	NA	NA	NA	NA	NA	NA	NA	NA	NA	NA	NA	NA	80565	0.011752	881	NA	NA	W087	0.997445	28675	5	aspA,gltA,tkt,porA	glnA,glyA,pgm,uncA,fn_gyrA	100	86.786	268.129	18	89	77	98	138	17	16	1612	36	7	1	4	10035	W087___18___89___77___98___138___17___16___1612___36	additional strain
[truncated: 1 more columns]

## Sheet: Predicted profiles 
sampleID	ST_gyrA_porA	abundance	ST	aspA	glnA	gltA	glyA	pgm	tkt	uncA	fn_gyrA	porA	max_ident	Cluster_member	mlst9_profile	SNP_clusterID	qvalue_depth_score	n_hits_score	unmatched_alleles	hits_summed_score	alleles_in_higher_abundance_profiles	corrected_score	seqID	matched_alleles	mean_query_ident	mean_template_ident	abundance_rank	Database
B015	45-7-467	0.875447	45	4	7	10	4	1	7	1	7	467	0.998055	B015-230519-01.fasta	B015___4___7___10___4___1___7___1___467___7	155	490.637	9		11621274	0	9	B015	aspA,glnA,gltA,glyA,pgm,tkt,uncA,porA,fn_gyrA	100	100	1	EUROPE
B021	48-3-7	0.526475	48	2	4	1	2	7	1	5	3	7	0.999568	B021-070519-01.fasta	B021___2___4___1___2___7___1___5___7___3	2	490.924	9		1989308	0	9	21-B021	aspA,glnA,gltA,glyA,pgm,tkt,uncA,porA,fn_gyrA	100	100	1	EUROPE
B023	448-102-2353	0.96501	448	61	70	22	18	2	74	47	102	2353	0.997959	B023-070519-01.fasta	B023___61___70___22___18___2___74___47___2353___102	206	496.054	9		3317275	0	9	21-B023	aspA,glnA,gltA,glyA,pgm,tkt,uncA,porA,fn_gyrA	100	100	1	EUROPE
B025	8205-7-49	0.530307	8205	4	7	10	4	1	7	530	7	49	0.994974	51821.fasta	B025___4___7___10___4___1___7___530___49___7	107	493.871	8	uncA	636367	0	8	B25	aspA,glnA,gltA,glyA,pgm,tkt,porA,fn_gyrA	100	100	1	EUROPE
B026	448-102-2353	0.959376	448	61	70	22	18	2	74	47	102	2353	0.997946	B023-070519-01.fasta	B026___61___70___22___18___2___74___47___2353___102	206	496.064	9		3082855	0	9	21-B026	aspA,glnA,gltA,glyA,pgm,tkt,uncA,porA,fn_gyrA	100	100	1	EUROPE
B027	677-19-276	0.842761	677	10	81	50	99	120	76	52	19	276	0.999914	B046-180619-01.fasta	B027___10___81___50___99___120___76___52___276___19	62	491.975	9		4842611	0	9	21-B027	aspA,glnA,gltA,glyA,pgm,tkt,uncA,porA,fn_gyrA	100	100	1	EUROPE
B027	951-31-2358	0.15595	951	18	100	82	24	138	116	63	31	2358	0.999942	B096-300719-02.fasta	B027___18___100___82___24___138___116___63___2358___31	718	484.21	8	aspA	642920	0	8	21-B027	glnA,gltA,glyA,pgm,tkt,uncA,porA,fn_gyrA	100	100	2	EUROPE
B028	951-31-2358	0.719521	951	18	100	82	24	138	116	63	31	2358	0.999971	B096-300719-02.fasta	B028___18___100___82___24___138___116___63___2358___31	718	494.346	9		6521825	0	9	B028	aspA,glnA,gltA,glyA,pgm,tkt,uncA,porA,fn_gyrA	100	100	1	EUROPE
B028	2491-11-1634	0.275546	2491	64	22	212	100	134	233	16	11	1634	0.999971	B028-230519-01.fasta	B028___64___22___212___100___134___233___16___1634___11	711	483.84	8	aspA	1299225	0	8	B028	glnA,gltA,glyA,pgm,tkt,uncA,porA,fn_gyrA	100	98.585	2	EUROPE
B029	448-31-860	0.985637	448	61	70	22	18	2	74	47	31	860	0.999942	B029-110619-02.fasta	B029___61___70___22___18___2___74___47___860___31	351	491.909	9		3824715	0	9	21-B029	aspA,glnA,gltA,glyA,pgm,tkt,uncA,porA,fn_gyrA	100	100	1	EUROPE
B029	10815-11-479	0.010677	10815	18	81	68	143	134	153	16	11	479	0.994196	B051-180619-02.fasta	B029___18___81___68___143___134___153___16___479___11	716	273.411	6	aspA,glnA,uncA	15790	0	6	21-B029	gltA,glyA,pgm,tkt,porA,fn_gyrA	100	86.725	2	EUROPE
B035	7831-380-4439	0.434147	7831	64	22	85	98	652	270	60	380	4439	0.999727	33960.fasta	B035___64___22___85___98___652___270___60___4439___380	490	490.447	9		947400	0	9	21-B035	aspA,glnA,gltA,glyA,pgm,tkt,uncA,porA,fn_gyrA	100	100	1	EUROPE
B035	6427-11-1157	0.115583	6427	64	95	20	100	514	101	60	11	1157	0.999885	78916.fasta	B035___64___95___20___100___514___101___60___1157___11	691	472.602	9		550647	2	7	21-B035	aspA,glnA,gltA,glyA,pgm,tkt,uncA,porA,fn_gyrA	100	97.0667	2	EUROPE
B035	10102-11-2366	0.03142	10102	64	22	203	100	134	160	60	11	2366	0.995951	W087-210621-01.fasta	B035___64___22___203___100___134___160___60___2366___11	299	482.023	7	gltA,porA	857538	5	2	21-B035	aspA,glnA,glyA,pgm,tkt,uncA,fn_gyrA	100	100	3	EUROPE
B035	11584-11-2372	0.029535	11584	64	22	20	189	134	94	16	11	2372	0.996698	B335-070621-01.fasta	B035___64___22___20___189___134___94___16___2372___11	738	412.247	7	tkt,porA	815265	5	2	21-B035	aspA,glnA,gltA,glyA,pgm,uncA,fn_gyrA	100	93.04	4	EUROPE
B035	7825-298-4437	0.017011	7825	258	174	474	193	753	595	131	298	4437	0.994774	33954.fasta	B035___258___174___474___193___753___595___131___4437___298	488	422.481	5	glnA,gltA,pgm,tkt	21056	0	5	21-B035	aspA,glyA,uncA,porA,fn_gyrA	100	99.07	13	EUROPE
B036	10813-11-2351	0.360182	10813	64	22	148	100	94	187	16	11	2351	0.999942	B050-180619-01.fasta	B036___64___22___148___100___94___187___16___2351___11	715	488.792	9		2454784	0	9	B036	aspA,glnA,gltA,glyA,pgm,tkt,uncA,porA,fn_gyrA	100	100	1	EUROPE
B036	1540-40-860	0.213057	1540	76	33	22	104	43	109	31	40	860	0.997971	B036-110619-01.fasta	B036___76___33___22___104___43___109___31___860___40	318	486.922	9		1948995	0	9	B036	aspA,glnA,gltA,glyA,pgm,tkt,uncA,porA,fn_gyrA	100	100	2	EUROPE
B036	11379-11-2367	0.067379	11379	64	226	203	189	652	54	16	11	2367	0.998374	B338-070621-02.fasta	B036___64___226___203___189___652___54___16___2367___11	740	398.311	7	pgm,porA	1223429	3	4	B036	aspA,glnA,gltA,glyA,tkt,uncA,fn_gyrA	100	93.83	4	EUROPE
B036	7836-99-2347	0.060783	7836	258	174	207	193	336	314	229	99	2347	0.999338	B113-130819-02.fasta	B036___258___174___207___193___336___314___229___2347___99	353	455.086	9		295978	0	9	B036	aspA,glnA,gltA,glyA,pgm,tkt,uncA,porA,fn_gyrA	100	99.5089	5	EUROPE
B037	6427-11-1157	0.168466	6427	64	95	20	100	514	101	60	11	1157	0.998675	78916.fasta	B037___64___95___20___100___514___101___60___1157___11	691	472.456	9		640141	0	9	B037	aspA,glnA,gltA,glyA,pgm,tkt,uncA,porA,fn_gyrA	100	99.8067	1	EUROPE
B037	45-7-49	0.158265	45	4	7	10	4	1	7	1	7	49	0.999597	B037-110619-01.fasta	B037___4___7___10___4___1___7___1___49___7	58	463.595	9		393257	0	9	B037	aspA,glnA,gltA,glyA,pgm,tkt,uncA,porA,fn_gyrA	100	97.9389	2	EUROPE
B037	11379-11-2367	0.053956	11379	64	226	203	189	652	54	16	11	2367	0.999611	B338-070621-02.fasta	B037___64___226___203___189___652___54___16___2367___11	740	448.793	9		994498	2	7	B037	aspA,glnA,gltA,glyA,pgm,tkt,uncA,porA,fn_gyrA	100	100	3	EUROPE
B037	7817-11-2531	0.0393	7817	64	22	460	351	752	187	60	11	2531	0.99578	107389.fasta	B037___64___22___460___351___752___187___60___2531___11	364	376.027	5	gltA,pgm,tkt,porA	427819	3	2	B037	aspA,glnA,glyA,uncA,fn_gyrA	99.928	89.456	4	EUROPE
B037	7811-11-2366	0.030689	7811	64	133	203	142	134	160	60	11	2366	0.996227	33939.fasta	B037___64___133___203___142___134___160___60___2366___11	299	404.195	7	glyA,porA	648831	5	2	B037	aspA,glnA,gltA,pgm,tkt,uncA,fn_gyrA	100	94.7286	6	EUROPE
B038	10811-36-1279	0.747846	10811	64	33	20	181	94	17	16	36	1279	0.999957	B038-110619-02.fasta	B038___64___33___20___181___94___17___16___1279___36	712	491.626	9		2689473	0	9	21-B038	aspA,glnA,gltA,glyA,pgm,tkt,uncA,porA,fn_gyrA	100	100	1	EUROPE
B038	10815-11-479	0.197144	10815	18	81	68	143	134	153	16	11	479	0.999813	B051-180619-02.fasta	B038___18___81___68___143___134___153___16___479___11	716	477.192	8	aspA	650662	1	7	21-B038	glnA,gltA,glyA,pgm,tkt,uncA,porA,fn_gyrA	100	98.2288	2	EUROPE
B038	3536-104-391	0.017851	3536	64	22	20	100	134	160	16	104	391	0.999036	B054-180619-01.fasta	B038___64___22___20___100___134___160___16___391___104	352	405.379	9		1018605	4	5	21-B038	aspA,glnA,gltA,glyA,pgm,tkt,uncA,porA,fn_gyrA	100	97.2644	3	EUROPE
B039	10820-11-1224	0.661469	10820	64	89	319	100	134	103	16	11	1224	0.998704	B039-110619-03.fasta	B039___64___89___319___100___134___103___16___1224___11	239	491.657	9		5175304	0	9	21-B039	aspA,glnA,gltA,glyA,pgm,tkt,uncA,porA,fn_gyrA	100	100	1	EUROPE
B039	7823-11-579	0.034452	7823	64	22	203	100	134	258	16	11	579	0.994572	33952.fasta	B039___64___22___203___100___134___258___16___579___11	487	400.455	7	tkt,porA	2837170	5	2	21-B039	aspA,glnA,gltA,glyA,pgm,uncA,fn_gyrA	100	93.6286	3	EUROPE
B039	7805-11-2367	0.032098	7805	64	22	85	98	134	101	16	11	2367	0.994025	33933.fasta	B039___64___22___85___98___134___101___16___2367___11	483	363.572	7	gltA,porA	2258104	5	2	21-B039	aspA,glnA,glyA,pgm,tkt,uncA,fn_gyrA	100	89.8786	4	EUROPE
B039	7850-103-1603	0.022728	7850	64	22	71	189	134	118	60	103	1603	0.994054	34076.fasta	B039___64___22___71___189___134___118___60___1603___103	499	409.579	6	glyA,tkt,fn_gyrA	1180578	3	3	21-B039	aspA,glnA,gltA,pgm,uncA,porA	100	99.4067	6	EUROPE
B039	10817-103-2354	0.01593	10817	258	174	154	193	336	421	131	103	2354	0.993146	B038-110619-03.fasta	B039___258___174___154___193___336___421___131___2354___103	713	434.253	4	gltA,pgm,tkt,porA,fn_gyrA	90335	0	4	21-B039	aspA,glnA,glyA,uncA	100	100	10	EUROPE
B045	464-3-2348	0.45866	464	24	2	2	2	10	3	1	3	2348	0.994732	B045-180619-01.fasta	B045___24___2___2___2___10___3___1___2348___3	29	491.126	9		4019471	0	9	B045	aspA,glnA,gltA,glyA,pgm,tkt,uncA,porA,fn_gyrA	100	100	1	EUROPE
B047	19-8-327	0.665685	19	2	1	5	3	2	1	5	8	327	0.995395	B108-130819-01.fasta	B047___2___1___5___3___2___1___5___327___8	94	490.611	9		6990574	0	9	B047	aspA,glnA,gltA,glyA,pgm,tkt,uncA,porA,fn_gyrA	100	100	1	EUROPE
B050	10813-11-2351	0.769245	10813	64	22	148	100	94	187	16	11	2351	1	B050-180619-01.fasta	B050___64___22___148___100___94___187___16___2351___11	715	490.223	9		5832857	0	9	B050	aspA,glnA,gltA,glyA,pgm,tkt,uncA,porA,fn_gyrA	100	100	1	EUROPE
B050	1080-74-130	0.169744	1080	10	2	107	137	120	76	1	74	130	0.999841	B300-140421-01.fasta	B050___10___2___107___137___120___76___1___130___74	731	473.991	9		894039	0	9	B050	aspA,glnA,gltA,glyA,pgm,tkt,uncA,porA,fn_gyrA	100	100	2	EUROPE
B050	7836-99-2347	0.039711	7836	258	174	207	193	336	314	229	99	2347	0.996138	B113-130819-02.fasta	B050___258___174___207___193___336___314___229___2347___99	353	445.257	9		319416	0	9	B050	aspA,glnA,gltA,glyA,pgm,tkt,uncA,porA,fn_gyrA	100	100	3	EUROPE
B051	10815-11-479	0.468651	10815	18	81	68	143	134	153	16	11	479	1	B051-180619-02.fasta	B051___18___81___68___143___134___153___16___479___11	716	490.726	9		771349	0	9	21-B051	aspA,glnA,gltA,glyA,pgm,tkt,uncA,porA,fn_gyrA	100	100	1	EUROPE
B051	2401-11-1096	0.2633	2401	64	105	20	287	94	103	16	11	1096	0.999239	16380.fasta	B051___64___105___20___287___94___103___16___1096___11	402	464.049	8	porA	399563	2	6	21-B051	aspA,glnA,gltA,glyA,pgm,tkt,uncA,fn_gyrA	100	97.5362	2	EUROPE
B051	6591-11-1634	0.038601	6591	64	105	20	77	94	103	16	11	1634	0.996354	B121-270819-02.fasta	B051___64___105___20___77___94___103___16___1634___11	724	490.219	9		466481	7	2	21-B051	aspA,glnA,gltA,glyA,pgm,tkt,uncA,porA,fn_gyrA	100	99.3356	4	EUROPE
B052	11379-11-2367	0.413292	11379	64	226	203	189	652	54	16	11	2367	0.999611	B338-070621-02.fasta	B052___64___226___203___189___652___54___16___2367___11	740	490.234	9		2200803	0	9	21-B052	aspA,glnA,gltA,glyA,pgm,tkt,uncA,porA,fn_gyrA	100	100	1	EUROPE
B052	7815-11-2352	0.305683	7815	64	105	203	100	134	94	16	11	2352	0.999971	B052-180619-01.fasta	B052___64___105___203___100___134___94___16___2352___11	717	492.663	9		2208875	4	5	21-B052	aspA,glnA,gltA,glyA,pgm,tkt,uncA,porA,fn_gyrA	100	99.6044	2	EUROPE
B052	6427-11-1157	0.064827	6427	64	95	20	100	514	101	60	11	1157	0.998834	78916.fasta	B052___64___95___20___100___514___101___60___1157___11	691	454.316	9		1038261	3	6	21-B052	aspA,glnA,gltA,glyA,pgm,tkt,uncA,porA,fn_gyrA	100	97.3967	3	EUROPE
B052	10818-104-391	0.020523	10818	64	22	20	100	134	301	16	104	391	0.998417	B038-110619-01.fasta	B052___64___22___20___100___134___301___16___391___104	352	424.243	9		1490281	6	3	21-B052	aspA,glnA,gltA,glyA,pgm,tkt,uncA,porA,fn_gyrA	100	98.2789	6	EUROPE
B054	7882-36-2357	0.893644	7882	64	583	22	111	122	303	16	36	2357	0.999957	B112-130819-01.fasta	B054___64___583___22___111___122___303___16___2357___36	719	493.643	9		5892726	0	9	B054	aspA,glnA,gltA,glyA,pgm,tkt,uncA,porA,fn_gyrA	100	100	1	EUROPE
B054	801-36-127	0.075854	801	64	70	68	97	122	106	16	36	127	0.999986	B113-130819-01.fasta	B054___64___70___68___97___122___106___16___127___36	720	473.857	9		2851339	4	5	B054	aspA,glnA,gltA,glyA,pgm,tkt,uncA,porA,fn_gyrA	100	100	2	EUROPE
B054	3536-104-391	0.018203	3536	64	22	20	100	134	160	16	104	391	0.997467	B054-180619-01.fasta	B054___64___22___20___100___134___160___16___391___104	352	407.655	9		1506057	2	7	B054	aspA,glnA,gltA,glyA,pgm,tkt,uncA,porA,fn_gyrA	100	99.5533	3	EUROPE
B063	45-7-44	0.381428	45	4	7	10	4	1	7	1	7	44	0.999784	B072-020719-02.fasta	B063___4___7___10___4___1___7___1___44___7	36	491.308	9		4543931	0	9	21-B063	aspA,glnA,gltA,glyA,pgm,tkt,uncA,porA,fn_gyrA	100	100	1	EUROPE
B063	8202-1-73	0.250081	8202	4	22	40	4	42	51	1	1	73	0.999741	47721.fasta	B063___4___22___40___4___42___51___1___73___1	21	486.904	8	gltA	2649941	3	5	21-B063	aspA,glnA,glyA,pgm,tkt,uncA,porA,fn_gyrA	100	99.6075	2	EUROPE
B063	177-31-236	0.103537	177	17	2	8	5	8	2	4	31	236	0.997478	B103-300719-02.fasta	B063___17___2___8___5___8___2___4___236___31	226	435.391	9		981599	0	9	21-B063	aspA,glnA,gltA,glyA,pgm,tkt,uncA,porA,fn_gyrA	100	96.39	3	EUROPE
B063	22-1-70	0.050952	22	1	3	6	4	3	3	3	1	70	0.997824	14651.fasta	B063___1___3___6___4___3___3___3___70___1	16	326.29	9		897586	2	7	21-B063	aspA,glnA,gltA,glyA,pgm,tkt,uncA,porA,fn_gyrA	100	94.8633	4	EUROPE
B067	1080-74-130	0.754062	1080	10	2	107	137	120	76	1	74	130	0.999957	B300-140421-01.fasta	B067___10___2___107___137___120___76___1___130___74	731	491.499	9		5382798	0	9	21-B067	aspA,glnA,gltA,glyA,pgm,tkt,uncA,porA,fn_gyrA	100	100	1	EUROPE
B067	383-1-73	0.183004	383	4	7	12	4	42	51	1	1	73	0.999438	B067-020719-01.fasta	B067___4___7___12___4___42___51___1___73___1	21	470.969	9		1632758	1	8	21-B067	aspA,glnA,gltA,glyA,pgm,tkt,uncA,porA,fn_gyrA	100	99.6511	2	EUROPE
B068	383-1-73	0.708031	383	4	7	12	4	42	51	1	1	73	0.999353	B067-020719-01.fasta	B068___4___7___12___4___42___51___1___73___1	21	489.246	9		4780879	0	9	21-B068	aspA,glnA,gltA,glyA,pgm,tkt,uncA,porA,fn_gyrA	100	100	1	EUROPE
B068	418-7-44	0.066314	418	4	7	2	4	1	7	1	7	44	0.999468	6025.fasta	B068___4___7___2___4___1___7___1___44___7	36	451.819	8	gltA	2335546	5	3	21-B068	aspA,glnA,glyA,pgm,tkt,uncA,porA,fn_gyrA	100	95.365	3	EUROPE
B071	45-7-44	0.99791	45	4	7	10	4	1	7	1	7	44	0.999827	B072-020719-02.fasta	B071___4___7___10___4___1___7___1___44___7	36	492.27	9		3624385	0	9	21-B071	aspA,glnA,gltA,glyA,pgm,tkt,uncA,porA,fn_gyrA	100	100	1	EUROPE
B076	383-1-73	0.822818	383	4	7	12	4	42	51	1	1	73	0.997379	B067-020719-01.fasta	B076___4___7___12___4___42___51___1___73___1	21	489.292	9		4999472	0	9	21-B076	aspA,glnA,gltA,glyA,pgm,tkt,uncA,porA,fn_gyrA	100	100	1	EUROPE
B077	383-1-73	0.813906	383	4	7	12	4	42	51	1	1	73	0.997322	B067-020719-01.fasta	B077___4___7___12___4___42___51___1___73___1	21	489.358	9		5658226	0	9	21-B077	aspA,glnA,gltA,glyA,pgm,tkt,uncA,porA,fn_gyrA	100	100	1	EUROPE
B078	383-1-73	0.80011	383	4	7	12	4	42	51	1	1	73	0.99849	B067-020719-01.fasta	B078___4___7___12___4___42___51___1___73___1	21	489.22	9		3360253	0	9	21-B078	aspA,glnA,gltA,glyA,pgm,tkt,uncA,porA,fn_gyrA	100	100	1	EUROPE
B080	383-1-73	0.803633	383	4	7	12	4	42	51	1	1	73	0.997409	B067-020719-01.fasta	B080___4___7___12___4___42___51___1___73___1	21	489.236	9		3207222	0	9	21-B080	aspA,glnA,gltA,glyA,pgm,tkt,uncA,porA,fn_gyrA	100	100	1	EUROPE
B082	383-1-73	0.824787	383	4	7	12	4	42	51	1	1	73	0.997666	B067-020719-01.fasta	B082___4___7___12___4___42___51___1___73___1	21	489.381	9		1798330	0	9	21-B082	aspA,glnA,gltA,glyA,pgm,tkt,uncA,porA,fn_gyrA	100	100	1	EUROPE
B083	383-1-73	0.809859	383	4	7	12	4	42	51	1	1	73	0.997323	B067-020719-01.fasta	B083___4___7___12___4___42___51___1___73___1	21	489.379	9		4291952	0	9	21-B083	aspA,glnA,gltA,glyA,pgm,tkt,uncA,porA,fn_gyrA	100	100	1	EUROPE
B086	383-1-73	0.823478	383	4	7	12	4	42	51	1	1	73	0.997558	B067-020719-01.fasta	B086___4___7___12___4___42___51___1___73___1	21	489.285	9		1914340	0	9	21-B086	aspA,glnA,gltA,glyA,pgm,tkt,uncA,porA,fn_gyrA	100	100	1	EUROPE
B096	951-31-2358	1	951	18	100	82	24	138	116	63	31	2358	0.999986	B096-300719-02.fasta	B096___18___100___82___24___138___116___63___2358___31	718	496.241	9		2110629	0	9	21-B096	aspA,glnA,gltA,glyA,pgm,tkt,uncA,porA,fn_gyrA	100	100	1	EUROPE
B100	383-1-73	0.825064	383	4	7	12	4	42	51	1	1	73	0.997546	B067-020719-01.fasta	B100___4___7___12___4___42___51___1___73___1	21	489.42	9		569431	0	9	B100	aspA,glnA,gltA,glyA,pgm,tkt,uncA,porA,fn_gyrA	100	100	1	EUROPE
B103	383-1-73	0.782585	383	4	7	12	4	42	51	1	1	73	0.999109	B067-020719-01.fasta	B103___4___7___12___4___42___51___1___73___1	21	489.268	9		3072627	0	9	21-B103	aspA,glnA,gltA,glyA,pgm,tkt,uncA,porA,fn_gyrA	100	100	1	EUROPE
B103	11384-31-236	0.037389	11384	17	2	670	5	8	2	4	31	236	0.998448	B063-020719-01.fasta	B103___17___2___670___5___8___2___4___236___31	226	407.096	8	glnA	80410	0	8	21-B103	aspA,gltA,glyA,pgm,tkt,uncA,porA,fn_gyrA	100	95.0312	3	EUROPE
B112	7882-36-2357	1	7882	64	583	22	111	122	303	16	36	2357	0.999971	B112-130819-01.fasta	B112___64___583___22___111___122___303___16___2357___36	719	495.14	9		3159542	0	9	21-B112	aspA,glnA,gltA,glyA,pgm,tkt,uncA,porA,fn_gyrA	100	100	1	EUROPE
B114	10810-101-2355	0.895926	10810	94	117	90	125	1094	147	100	101	2355	1	B114-130819-01.fasta	B114___94___117___90___125___1094___147___100___2355___101	721	495.795	9		2488218	0	9	21-B114	aspA,glnA,gltA,glyA,pgm,tkt,uncA,porA,fn_gyrA	100	100	1	EUROPE
B114	1277-105-2359	0.104074	1277	96	135	99	136	183	140	113	105	2359	0.999986	B114-130819-03.fasta	B114___96___135___99___136___183___140___113___2359___105	722	430.919	9		127038	0	9	21-B114	aspA,glnA,gltA,glyA,pgm,tkt,uncA,porA,fn_gyrA	100	95.7978	2	EUROPE
B119	11004-106-1772	1	11004	15	33	72	875	753	103	16	106	1772	0.999986	B119-270819-01.fasta	B119___15___33___72___875___753___103___16___1772___106	723	496.154	9		4394439	0	9	21-B119	aspA,glnA,gltA,glyA,pgm,tkt,uncA,porA,fn_gyrA	100	100	1	EUROPE
B121	6591-11-1634	1	6591	64	105	20	77	94	103	16	11	1634	0.999971	B121-270819-02.fasta	B121___64___105___20___77___94___103___16___1634___11	724	495.302	9		2208442	0	9	21-B121	aspA,glnA,gltA,glyA,pgm,tkt,uncA,porA,fn_gyrA	100	100	1	EUROPE
B122	19-8-327	0.633001	19	2	1	5	3	2	1	5	8	327	0.997893	B108-130819-01.fasta	B122___2___1___5___3___2___1___5___327___8	94	492.107	9		298155	0	9	21-B122	aspA,glnA,gltA,glyA,pgm,tkt,uncA,porA,fn_gyrA	100	100	1	EUROPE
B123	19-8-327	0.667314	19	2	1	5	3	2	1	5	8	327	0.995337	B108-130819-01.fasta	B123___2___1___5___3___2___1___5___327___8	94	492.207	9		578911	0	9	B123	aspA,glnA,gltA,glyA,pgm,tkt,uncA,porA,fn_gyrA	100	100	1	EUROPE
B155	692-4-3123	0.31414	692	37	52	57	26	127	29	23	4	3123	0.994563	78931.fasta	B155___37___52___57___26___127___29___23___3123___4	692	474.126	8	porA	3021807	0	8	21-B155	aspA,glnA,gltA,glyA,pgm,tkt,uncA,fn_gyrA	100	100	1	EUROPE
B158	5846-40-858	0.751463	5846	76	105	72	104	124	96	31	40	858	0.995543	B158-221019-01.fasta	B158___76___105___72___104___124___96___31___858___40	307	496.324	9		1737437	0	9	21-B158	aspA,glnA,gltA,glyA,pgm,tkt,uncA,porA,fn_gyrA	100	100	1	EUROPE
B167	1044-27-25	0.734733	1044	2	10	2	4	19	3	6	27	25	0.998938	B167-230720-01.fasta	B167___2___10___2___4___19___3___6___25___27	45	492.041	9		346243	0	9	21-B167	aspA,glnA,gltA,glyA,pgm,tkt,uncA,porA,fn_gyrA	100	100	1	EUROPE
B189	11-7-217	0.471928	11	48	7	10	4	1	7	1	7	217	0.991858	B183-300720-01.fasta	B189___48___7___10___4___1___7___1___217___7	256	488.214	9		10731339	0	9	B189	aspA,glnA,gltA,glyA,pgm,tkt,uncA,porA,fn_gyrA	100	100	1	EUROPE
B190	1277-105-2359	0.473431	1277	96	135	99	136	183	140	113	105	2359	0.999611	B114-130819-03.fasta	B190___96___135___99___136___183___140___113___2359___105	722	493.055	9		2142462	0	9	21-B190	aspA,glnA,gltA,glyA,pgm,tkt,uncA,porA,fn_gyrA	100	100	1	EUROPE
B190	11377-101-970	0.371424	11377	98	122	98	891	180	150	113	101	970	0.997133	B333-250521-01.fasta	B190___98___122___98___891___180___150___113___970___101	737	451.235	4	gltA,glyA,pgm,tkt,porA	752195	1	3	21-B190	aspA,glnA,uncA,fn_gyrA	100	97.2225	2	EUROPE
B190	11-7-217	0.054235	11	48	7	10	4	1	7	1	7	217	0.995563	B183-300720-01.fasta	B190___48___7___10___4___1___7___1___217___7	256	454.891	9		363793	0	9	21-B190	aspA,glnA,gltA,glyA,pgm,tkt,uncA,porA,fn_gyrA	100	97.8089	3	EUROPE
B193	5207-51-2356	1	5207	37	187	4	28	19	24	23	51	2356	0.999986	B193-200820-02.fasta	B193___37___187___4___28___19___24___23___2356___51	725	487.171	9		5037909	0	9	B193	aspA,glnA,gltA,glyA,pgm,tkt,uncA,porA,fn_gyrA	100	100	1	EUROPE
B194	8614-36-6	1	8614	2	1	4	28	58	672	58	36	6	1	B189-130820-01.fasta	B194___2___1___4___28___58___672___58___6___36	233	492.184	9		4634237	0	9	21-B194	aspA,glnA,gltA,glyA,pgm,tkt,uncA,porA,fn_gyrA	100	100	1	EUROPE
B198	8614-36-6	1	8614	2	1	4	28	58	672	58	36	6	1	B189-130820-01.fasta	B198___2___1___4___28___58___672___58___6___36	233	492.2	9		2522676	0	9	21-B198	aspA,glnA,gltA,glyA,pgm,tkt,uncA,porA,fn_gyrA	100	100	1	EUROPE
B203	11385-80-203	0.818471	11385	4	43	9	5	8	46	21	80	203	0.998848	B203-270820-01.fasta	B203___4___43___9___5___8___46___21___203___80	164	496.177	9		4154178	0	9	21-B203	aspA,glnA,gltA,glyA,pgm,tkt,uncA,porA,fn_gyrA	100	100	1	EUROPE
B203	677-19-276	0.023741	677	10	81	50	99	120	76	52	19	276	0.999885	B046-180619-01.fasta	B203___10___81___50___99___120___76___52___276___19	62	343.227	9		64309	0	9	21-B203	aspA,glnA,gltA,glyA,pgm,tkt,uncA,porA,fn_gyrA	100	92.12	4	EUROPE
B203	11381-109-2368	0.010582	11381	577	2	397	91	884	748	51	109	2368	0.992671	B203-270820-02.fasta	B203___577___2___397___91___884___748___51___2368___109	726	361.25	9		61487	1	8	21-B203	aspA,glnA,gltA,glyA,pgm,tkt,uncA,porA,fn_gyrA	100	98.0922	7	EUROPE
B221	1294-13-152	0.99604	1294	2	59	96	48	131	24	57	13	152	0.999986	B221-240920-01.fasta	B221___2___59___96___48___131___24___57___152___13	727	492.158	9		2224645	0	9	21-B221	aspA,glnA,gltA,glyA,pgm,tkt,uncA,porA,fn_gyrA	100	100	1	EUROPE
B250	11376-108-2370	0.807134	11376	578	143	116	151	198	189	33	108	2370	0.999986	B250-060321-01.fasta	B250___578___143___116___151___198___189___33___2370___108	728	494.735	9		88718	0	9	B250	aspA,glnA,gltA,glyA,pgm,tkt,uncA,porA,fn_gyrA	100	100	1	EUROPE
B251	11376-108-2370	0.630928	11376	578	143	116	151	198	189	33	108	2370	0.9993	B250-060321-01.fasta	B251___578___143___116___151___198___189___33___2370___108	728	489.998	9		34282	0	9	B251	aspA,glnA,gltA,glyA,pgm,tkt,uncA,porA,fn_gyrA	100	100	1	EUROPE
B266	6313-107-2369	0.941746	6313	323	439	384	483	611	512	371	107	2369	0.999888	B302-140421-01.fasta	B266___323___439___384___483___611___512___371___2369___107	732	495.924	9		213147	0	9	B266	aspA,glnA,gltA,glyA,pgm,tkt,uncA,porA,fn_gyrA	100	100	1	EUROPE
B284	11413-110-2371	0.983177	11413	95	795	671	892	1137	872	717	110	2371	1	B284-140421-02.fasta	B284___95___795___671___892___1137___872___717___2371___110	729	491.709	9		4365791	0	9	B284	aspA,glnA,gltA,glyA,pgm,tkt,uncA,porA,fn_gyrA	100	100	1	EUROPE
B285	1316-74-463	1	1316	95	2	94	127	181	144	110	74	463	0.999986	B285-140421-02.fasta	B285___95___2___94___127___181___144___110___463___74	730	492.219	9		6216924	0	9	B285	aspA,glnA,gltA,glyA,pgm,tkt,uncA,porA,fn_gyrA	100	100	1	EUROPE
B288	6313-107-2369	0.999327	6313	323	439	384	483	611	512	371	107	2369	0.999842	B302-140421-01.fasta	B288___323___439___384___483___611___512___371___2369___107	732	496.135	9		3597499	0	9	B288	aspA,glnA,gltA,glyA,pgm,tkt,uncA,porA,fn_gyrA	100	100	1	EUROPE
B299	6313-107-2369	1	6313	323	439	384	483	611	512	371	107	2369	0.999842	B302-140421-01.fasta	B299___323___439___384___483___611___512___371___2369___107	732	496.24	9		5459398	0	9	B299	aspA,glnA,gltA,glyA,pgm,tkt,uncA,porA,fn_gyrA	100	100	1	EUROPE
B300	1080-74-130	1	1080	10	2	107	137	120	76	1	74	130	0.999971	B300-140421-01.fasta	B300___10___2___107___137___120___76___1___130___74	731	491.961	9		4805983	0	9	B300	aspA,glnA,gltA,glyA,pgm,tkt,uncA,porA,fn_gyrA	100	100	1	EUROPE
B302	6313-107-2369	1	6313	323	439	384	483	611	512	371	107	2369	0.999942	B302-140421-01.fasta	B302___323___439___384___483___611___512___371___2369___107	732	496.271	9		3787100	0	9	B302	aspA,glnA,gltA,glyA,pgm,tkt,uncA,porA,fn_gyrA	100	100	1	EUROPE
B303	11376-108-2370	0.823403	11376	578	143	116	151	198	189	33	108	2370	0.999952	B250-060321-01.fasta	B303___578___143___116___151___198___189___33___2370___108	728	498.736	8	glnA	26947	0	8	B303	aspA,gltA,glyA,pgm,tkt,uncA,porA,fn_gyrA	100	100	1	EUROPE
B308	11376-108-2370	1	11376	578	143	116	151	198	189	33	108	2370	1	B250-060321-01.fasta	B308___578___143___116___151___198___189___33___2370___108	728	496.133	9		1324437	0	9	B308	aspA,glnA,gltA,glyA,pgm,tkt,uncA,porA,fn_gyrA	100	100	1	EUROPE
B318	45-7-49	0.907399	45	4	7	10	4	1	7	1	7	49	0.998689	B037-110619-01.fasta	B318___4___7___10___4___1___7___1___49___7	58	492.362	9		3942328	0	9	B318	aspA,glnA,gltA,glyA,pgm,tkt,uncA,porA,fn_gyrA	100	100	1	EUROPE
B320	4570-37-1795	1	4570	64	22	20	100	242	204	16	37	1795	0.999986	B320-050521-02.fasta	B320___64___22___20___100___242___204___16___1795___37	733	494.002	9		2271464	0	9	B320	aspA,glnA,gltA,glyA,pgm,tkt,uncA,porA,fn_gyrA	100	100	1	EUROPE
B321	11383-11-1598	0.906572	11383	64	33	78	18	1136	86	16	11	1598	0.999972	B321-050521-01.fasta	B321___64___33___78___18___1136___86___16___1598___11	734	495.783	9		124503	0	9	B321	aspA,glnA,gltA,glyA,pgm,tkt,uncA,porA,fn_gyrA	100	100	1	EUROPE
B325	563-31-909	0.392866	563	17	5	8	5	8	2	4	31	909	0.995996	B325-250521-01.fasta	B325___17___5___8___5___8___2___4___909___31	211	491.87	9		2409690	0	9	B325	aspA,glnA,gltA,glyA,pgm,tkt,uncA,porA,fn_gyrA	100	100	1	EUROPE
B326	11383-11-1598	0.411214	11383	64	33	78	18	1136	86	16	11	1598	0.999986	B321-050521-01.fasta	B326___64___33___78___18___1136___86___16___1598___11	734	494.367	9		1443315	0	9	B326	aspA,glnA,gltA,glyA,pgm,tkt,uncA,porA,fn_gyrA	100	100	1	EUROPE
B326	4570-37-1795	0.355691	4570	64	22	20	100	242	204	16	37	1795	0.999986	B320-050521-02.fasta	B326___64___22___20___100___242___204___16___1795___37	733	489.591	9		1073006	2	7	B326	aspA,glnA,gltA,glyA,pgm,tkt,uncA,porA,fn_gyrA	100	100	2	EUROPE
B326	448-31-860	0.13621	448	61	70	22	18	2	74	47	31	860	0.999986	B029-110619-02.fasta	B326___61___70___22___18___2___74___47___860___31	351	452.828	9		317344	1	8	B326	aspA,glnA,gltA,glyA,pgm,tkt,uncA,porA,fn_gyrA	100	98.3278	3	EUROPE
B327	11382-31-1468	1	11382	80	70	164	98	123	229	16	31	1468	0.999986	B327-250521-01.fasta	B327___80___70___164___98___123___229___16___1468___31	735	496.491	9		3235964	0	9	B327	aspA,glnA,gltA,glyA,pgm,tkt,uncA,porA,fn_gyrA	100	100	1	EUROPE
B328	6386-36-406	0.953292	6386	64	95	20	100	514	301	60	36	406	0.999971	B328-250521-02.fasta	B328___64___95___20___100___514___301___60___406___36	736	489.735	9		603959	0	9	B328	aspA,glnA,gltA,glyA,pgm,tkt,uncA,porA,fn_gyrA	100	100	1	EUROPE
B329	677-19-276	0.95159	677	10	81	50	99	120	76	52	19	276	0.999942	B046-180619-01.fasta	B329___10___81___50___99___120___76___52___276___19	62	492.175	9		8307703	0	9	B329	aspA,glnA,gltA,glyA,pgm,tkt,uncA,porA,fn_gyrA	100	100	1	EUROPE
B329	1021-80-1683	0.018259	1021	17	2	9	5	8	46	21	80	1683	0.992326	ERR904615_innuendo.fasta	B329___17___2___9___5___8___46___21___1683___80	743	360.9	5	pgm,tkt,uncA,porA	96540	1	4	B329	aspA,glnA,gltA,glyA,fn_gyrA	100	97.276	2	EUROPE
B330	677-19-276	0.9991	677	10	81	50	99	120	76	52	19	276	0.999784	B046-180619-01.fasta	B330___10___81___50___99___120___76___52___276___19	62	492.276	9		8877424	0	9	B330	aspA,glnA,gltA,glyA,pgm,tkt,uncA,porA,fn_gyrA	100	100	1	EUROPE
B331	677-19-276	0.774934	677	10	81	50	99	120	76	52	19	276	0.999957	B046-180619-01.fasta	B331___10___81___50___99___120___76___52___276___19	62	491.782	9		4855265	0	9	B331	aspA,glnA,gltA,glyA,pgm,tkt,uncA,porA,fn_gyrA	100	100	1	EUROPE
B331	45-7-49	0.154478	45	4	7	10	4	1	7	1	7	49	0.998517	B037-110619-01.fasta	B331___4___7___10___4___1___7___1___49___7	58	477.171	9		740002	0	9	B331	aspA,glnA,gltA,glyA,pgm,tkt,uncA,porA,fn_gyrA	100	99.1922	2	EUROPE
B333	11377-101-970	0.999549	11377	98	122	98	891	180	150	113	101	970	0.999986	B333-250521-01.fasta	B333___98___122___98___891___180___150___113___970___101	737	496.174	9		2363119	0	9	B333	aspA,glnA,gltA,glyA,pgm,tkt,uncA,porA,fn_gyrA	100	100	1	EUROPE
B335	11584-11-2372	0.415015	11584	64	22	20	189	134	94	16	11	2372	0.999986	B335-070621-01.fasta	B335___64___22___20___189___134___94___16___2372___11	738	488.867	9		899827	0	9	B335	aspA,glnA,gltA,glyA,pgm,tkt,uncA,porA,fn_gyrA	100	100	1	EUROPE
B335	6592-11-2846	0.139106	6592	64	467	71	100	134	101	16	11	2846	0.999151	59179.fasta	B335___64___467___71___100___134___101___16___2846___11	611	472.704	7	tkt,porA	592650	4	3	B335	aspA,glnA,gltA,glyA,pgm,uncA,fn_gyrA	100	100	2	EUROPE
B335	11383-11-1598	0.115393	11383	64	33	78	18	1136	86	16	11	1598	0.999957	B321-050521-01.fasta	B335___64___33___78___18___1136___86___16___1598___11	734	482.831	9		501980	3	6	B335	aspA,glnA,gltA,glyA,pgm,tkt,uncA,porA,fn_gyrA	100	97.0122	3	EUROPE
B335	11379-11-2367	0.062059	11379	64	226	203	189	652	54	16	11	2367	0.999698	B338-070621-02.fasta	B335___64___226___203___189___652___54___16___2367___11	740	469.766	9		533310	4	5	B335	aspA,glnA,gltA,glyA,pgm,tkt,uncA,porA,fn_gyrA	100	98.4378	4	EUROPE
B335	10813-11-2351	0.053484	10813	64	22	148	100	94	187	16	11	2351	0.999827	B050-180619-01.fasta	B335___64___22___148___100___94___187___16___2351___11	715	458.981	9		588077	5	4	B335	aspA,glnA,gltA,glyA,pgm,tkt,uncA,porA,fn_gyrA	100	89.7767	5	EUROPE
B335	4570-37-1795	0.042397	4570	64	22	20	100	242	204	16	37	1795	0.999741	B320-050521-02.fasta	B335___64___22___20___100___242___204___16___1795___37	733	469.811	8	fn_gyrA	542595	5	3	B335	aspA,glnA,gltA,glyA,pgm,tkt,uncA,porA	100	93.7075	6	EUROPE
B335	10820-11-1224	0.016753	10820	64	89	319	100	134	103	16	11	1224	0.998777	B039-110619-03.fasta	B335___64___89___319___100___134___103___16___1224___11	239	447.492	7	gltA,porA	564422	5	2	B335	aspA,glnA,glyA,pgm,tkt,uncA,fn_gyrA	100	90.6071	8	EUROPE
B336	11379-11-2367	0.45699	11379	64	226	203	189	652	54	16	11	2367	0.999526	B338-070621-02.fasta	B336___64___226___203___189___652___54___16___2367___11	740	491.343	9		1943365	0	9	B336	aspA,glnA,gltA,glyA,pgm,tkt,uncA,porA,fn_gyrA	100	100	1	EUROPE
B336	1481-31-1836	0.306362	1481	35	5	9	5	8	2	2	31	1836	1	B336-070621-02.fasta	B336___35___5___9___5___8___2___2___1836___31	739	485.304	9		859779	0	9	B336	aspA,glnA,gltA,glyA,pgm,tkt,uncA,porA,fn_gyrA	100	100	2	EUROPE
B336	6451-11-348	0.073375	6451	277	105	20	143	134	54	16	11	348	0.999742	50477.fasta	B336___277___105___20___143___134___54___16___348___11	320	481.925	8	gltA	798093	3	5	B336	aspA,glnA,glyA,pgm,tkt,uncA,porA,fn_gyrA	100	97.8512	3	EUROPE
B337	1044-27-25	0.585712	1044	2	10	2	4	19	3	6	27	25	0.999799	B167-230720-01.fasta	B337___2___10___2___4___19___3___6___25___27	45	491.033	9		1676056	0	9	B337	aspA,glnA,gltA,glyA,pgm,tkt,uncA,porA,fn_gyrA	100	100	1	EUROPE
B337	11383-11-1598	0.085308	11383	64	33	78	18	1136	86	16	11	1598	0.999986	B321-050521-01.fasta	B337___64___33___78___18___1136___86___16___1598___11	734	422.276	8	pgm	118670	0	8	B337	aspA,glnA,gltA,glyA,tkt,uncA,porA,fn_gyrA	100	92.9213	3	EUROPE
B337	8368-39-680	0.041294	8368	27	22	22	104	115	86	31	39	680	0.999799	50656.fasta	B337___27___22___22___104___115___86___31___680___39	321	396.998	9		68658	1	8	B337	aspA,glnA,gltA,glyA,pgm,tkt,uncA,porA,fn_gyrA	100	97.8644	4	EUROPE
B337	794-19-276	0.012208	794	10	81	50	87	120	76	52	19	276	0.995866	21323.fasta	B337___10___81___50___87___120___76___52___276___19	62	251.803	7	aspA,glyA	15370	0	7	B337	glnA,gltA,pgm,tkt,uncA,porA,fn_gyrA	100	85.56	5	EUROPE
B337	10035-36-1612	0.010582	10035	18	89	77	98	138	17	16	36	1612	0.993081	80565.fasta	B337___18___89___77___98___138___17___16___1612___36	709	405.518	4	glnA,glyA,tkt,porA,fn_gyrA	31547	1	3	B337	aspA,gltA,pgm,uncA	100	98.6675	6	EUROPE
B338	11379-11-2367	0.710597	11379	64	226	203	189	652	54	16	11	2367	0.999971	B338-070621-02.fasta	B338___64___226___203___189___652___54___16___2367___11	740	491.998	9		2992383	0	9	B338	aspA,glnA,gltA,glyA,pgm,tkt,uncA,porA,fn_gyrA	100	100	1	EUROPE
B338	11383-11-1598	0.209499	11383	64	33	78	18	1136	86	16	11	1598	0.999957	B321-050521-01.fasta	B338___64___33___78___18___1136___86___16___1598___11	734	489.99	9		1534667	3	6	B338	aspA,glnA,gltA,glyA,pgm,tkt,uncA,porA,fn_gyrA	100	100	2	EUROPE
B338	7820-11-1603	0.01584	7820	64	288	203	189	134	94	60	11	1603	0.997493	33958.fasta	B338___64___288___203___189___134___94___60___1603___11	489	450.544	6	tkt,uncA,porA	1367221	4	2	B338	aspA,glnA,gltA,glyA,pgm,fn_gyrA	100	100	3	EUROPE
B339	267-1-73	0.99321	267	4	7	40	4	42	51	1	1	73	0.999842	B339-070621-01.fasta	B339___4___7___40___4___42___51___1___73___1	21	489.226	9		3232186	0	9	B339	aspA,glnA,gltA,glyA,pgm,tkt,uncA,porA,fn_gyrA	100	100	1	EUROPE
B342	354-8-957	0.843148	354	8	10	2	2	11	12	6	8	957	0.999871	34524.fasta	B342___8___10___2___2___11___12___6___957___8	14	491.138	8	pgm	4077625	0	8	B342	aspA,glnA,gltA,glyA,tkt,uncA,porA,fn_gyrA	100	100	1	EUROPE
B342	19-1-7	0.121649	19	2	1	5	3	2	1	5	1	7	1	5895.fasta	B342___2___1___5___3___2___1___5___7___1	3	380.335	9		130591	0	9	B342	aspA,glnA,gltA,glyA,pgm,tkt,uncA,porA,fn_gyrA	100	91.5956	2	EUROPE
B345	383-1-73	0.559347	383	4	7	12	4	42	51	1	1	73	0.999094	B067-020719-01.fasta	B345___4___7___12___4___42___51___1___73___1	21	488.814	9		3153635	0	9	B345	aspA,glnA,gltA,glyA,pgm,tkt,uncA,porA,fn_gyrA	100	100	1	EUROPE
B345	563-31-909	0.112014	563	17	5	8	5	8	2	4	31	909	0.995757	B325-250521-01.fasta	B345___17___5___8___5___8___2___4___909___31	211	481.9	9		899277	0	9	B345	aspA,glnA,gltA,glyA,pgm,tkt,uncA,porA,fn_gyrA	100	100	2	EUROPE
B353	448-31-639	0.663196	448	61	70	22	18	2	74	47	31	639	0.992634	B353-210621-01.fasta	B353___61___70___22___18___2___74___47___639___31	351	496.486	9		1314283	0	9	B353	aspA,glnA,gltA,glyA,pgm,tkt,uncA,porA,fn_gyrA	100	100	1	EUROPE
B354	2162-7-634	0.832684	2162	35	43	8	51	8	2	21	7	634	0.998212	B354-210621-01.fasta	B354___35___43___8___51___8___2___21___634___7	216	492.184	9		1106140	0	9	B354	aspA,glnA,gltA,glyA,pgm,tkt,uncA,porA,fn_gyrA	100	100	1	EUROPE
B354	677-19-276	0.056211	677	10	81	50	99	120	76	52	19	276	0.999743	B046-180619-01.fasta	B354___10___81___50___99___120___76___52___276___19	62	406.264	9		24510	0	9	B354	aspA,glnA,gltA,glyA,pgm,tkt,uncA,porA,fn_gyrA	100	86.5667	2	EUROPE
B355	267-1-73	0.896776	267	4	7	40	4	42	51	1	1	73	0.999611	B339-070621-01.fasta	B355___4___7___40___4___42___51___1___73___1	21	489.28	9		4929073	0	9	B355	aspA,glnA,gltA,glyA,pgm,tkt,uncA,porA,fn_gyrA	100	100	1	EUROPE
B355	2162-31-634	0.029017	2162	35	43	8	51	8	2	21	31	634	0.998343	62524.fasta	B355___35___43___8___51___8___2___21___634___31	216	384.095	9		110069	0	9	B355	aspA,glnA,gltA,glyA,pgm,tkt,uncA,porA,fn_gyrA	100	97.8589	3	EUROPE
B357	11378-7-1621	0.798885	11378	35	5	8	51	8	2	21	7	1621	0.99783	B357-210621-01.fasta	B357___35___5___8___51___8___2___21___1621___7	216	491.806	9		233548	0	9	B357	aspA,glnA,gltA,glyA,pgm,tkt,uncA,porA,fn_gyrA	100	100	1	EUROPE
B358	45-7-44	0.647432	45	4	7	10	4	1	7	1	7	44	0.999971	B072-020719-02.fasta	B358___4___7___10___4___1___7___1___44___7	36	491.99	9		4250671	0	9	B358	aspA,glnA,gltA,glyA,pgm,tkt,uncA,porA,fn_gyrA	100	100	1	EUROPE
B358	6234-1-73	0.258084	6234	4	326	40	4	42	51	1	1	73	0.99987	22296.fasta	B358___4___326___40___4___42___51___1___73___1	21	479.659	8	glnA	1964271	3	5	B358	aspA,gltA,glyA,pgm,tkt,uncA,porA,fn_gyrA	100	98.845	2	EUROPE
B361	230-1-217	0.539187	230	4	7	41	4	42	7	1	1	217	0.999928	B361-210621-01.fasta	B361___4___7___41___4___42___7___1___217___1	21	492.275	9		4704782	0	9	B361	aspA,glnA,gltA,glyA,pgm,tkt,uncA,porA,fn_gyrA	100	100	1	EUROPE
B362	267-1-73	0.799407	267	4	7	40	4	42	51	1	1	73	0.999928	B339-070621-01.fasta	B362___4___7___40___4___42___51___1___73___1	21	489.138	9		2911212	0	9	B362	aspA,glnA,gltA,glyA,pgm,tkt,uncA,porA,fn_gyrA	100	100	1	EUROPE
B362	677-19-276	0.099071	677	10	81	50	99	120	76	52	19	276	0.999928	B046-180619-01.fasta	B362___10___81___50___99___120___76___52___276___19	62	461.054	9		200254	0	9	B362	aspA,glnA,gltA,glyA,pgm,tkt,uncA,porA,fn_gyrA	100	99.89	2	EUROPE
B364	11380-11-200	0.991815	11380	18	33	72	98	116	871	6	11	200	0.999971	B364-210621-01.fasta	B364___18___33___72___98___116___871___6___200___11	741	493.74	9		778619	0	9	B364	aspA,glnA,gltA,glyA,pgm,tkt,uncA,porA,fn_gyrA	100	100	1	EUROPE
W021	704-13-886	0.93011	704	2	29	4	27	10	25	57	13	886	0.999972	W021-240919-01.fasta	W021___2___29___4___27___10___25___57___886___13	234	489.188	9		102585	0	9	21-W021	aspA,glnA,gltA,glyA,pgm,tkt,uncA,porA,fn_gyrA	100	100	1	EUROPE
W022	683-80-468	0.503319	683	35	43	9	5	121	46	21	80	468	0.998199	42540.fasta	W022___35___43___9___5___121___46___21___468___80	164	489.149	9		2627421	0	9	W022	aspA,glnA,gltA,glyA,pgm,tkt,uncA,porA,fn_gyrA	100	100	1	EUROPE
W026	692-4-3123	0.239241	692	37	52	57	26	127	29	23	4	3123	0.997402	78931.fasta	W026___37___52___57___26___127___29___23___3123___4	692	465.914	8	porA	299523	0	8	W026	aspA,glnA,gltA,glyA,pgm,tkt,uncA,fn_gyrA	100	100	1	EUROPE
W026	693-13-819	0.095749	693	2	29	4	48	13	24	57	13	819	0.999814	78944.fasta	W026___2___29___4___48___13___24___57___819___13	349	341.233	8	glyA	64594	0	8	W026	aspA,glnA,gltA,pgm,tkt,uncA,porA,fn_gyrA	100	83.3838	4	EUROPE
W052	8235-4-6	0.215624	8235	37	52	57	26	107	25	23	4	6	0.999828	47860.fasta	W052___37___52___57___26___107___25___23___6___4	105	494.901	7	glnA,gltA	752222	0	7	W052	aspA,glyA,pgm,tkt,uncA,porA,fn_gyrA	100	100	1	EUROPE
W052	1397-13-152	0.122379	1397	2	4	84	105	236	25	57	13	152	0.992934	6436.fasta	W052___2___4___84___105___236___25___57___152___13	220	451.051	4	glnA,glyA,pgm,porA,fn_gyrA	969276	1	3	W052	aspA,gltA,tkt,uncA	100	100	2	EUROPE
W052	2875-13-886	0.122343	2875	2	29	4	48	10	25	57	13	886	0.991369	51516.fasta	W052___2___29___4___48___10___25___57___886___13	234	475.532	5	gltA,pgm,porA,fn_gyrA	1175942	3	2	W052	aspA,glnA,glyA,tkt,uncA	100	100	3	EUROPE
W052	4187-4-188	0.102521	4187	2	59	4	48	126	29	23	4	188	0.993796	77684.fasta	W052___2___59___4___48___126___29___23___188___4	237	448.598	7	gltA,pgm	1098299	5	2	W052	aspA,glnA,glyA,tkt,uncA,porA,fn_gyrA	100	96.7057	4	EUROPE
W053	3904-7-2027	0.093399	3904	1	7	10	349	261	7	1	7	2027	0.999655	112078.fasta	W053___1___7___10___349___261___7___1___2027___7	246	350.66	8	aspA	23510	0	8	W053	glnA,gltA,glyA,pgm,tkt,uncA,porA,fn_gyrA	100	92.9013	1	EUROPE
W053	177-80-1836	0.043073	177	17	2	8	5	8	2	4	80	1836	0.998951	79263.fasta	W053___17___2___8___5___8___2___4___1836___80	698	424.928	7	porA,fn_gyrA	50441	1	6	W053	aspA,glnA,gltA,glyA,pgm,tkt,uncA	100	100	7	EUROPE
W053	2538-31-3144	0.026437	2538	35	2	8	51	361	2	21	31	3144	0.998879	79265.fasta	W053___35___2___8___51___361___2___21___3144___31	350	316.225	6	aspA,glyA,porA	29614	4	2	W053	glnA,gltA,pgm,tkt,uncA,fn_gyrA	99.9533	91.585	14	EUROPE
W054	563-31-2648	0.066781	563	17	5	8	5	8	2	4	31	2648	0.998933	42534.fasta	W054___17___5___8___5___8___2___4___2648___31	211	412.277	8	uncA	37584	0	8	W054	aspA,glnA,gltA,glyA,pgm,tkt,porA,fn_gyrA	99.9688	92.81	2	EUROPE
W078	45-80-217	0.101773	45	4	7	10	4	1	7	1	80	217	0.997766	57334.fasta	W078___4___7___10___4___1___7___1___217___80	40	435.504	9		79612	0	9	W078	aspA,glnA,gltA,glyA,pgm,tkt,uncA,porA,fn_gyrA	100	100	1	EUROPE
W079	801-36-127	0.254012	801	64	70	68	97	122	106	16	36	127	0.999971	B113-130819-01.fasta	W079___64___70___68___97___122___106___16___127___36	720	462.476	9		250667	0	9	W079	aspA,glnA,gltA,glyA,pgm,tkt,uncA,porA,fn_gyrA	100	100	1	EUROPE
W079	19-8-582	0.049151	19	2	1	5	3	2	1	5	8	582	1	109829.fasta	W079___2___1___5___3___2___1___5___582___8	3	393.406	8	porA	103065	1	7	W079	aspA,glnA,gltA,glyA,pgm,tkt,uncA,fn_gyrA	100	98.6375	7	EUROPE
W081	11384-31-236	0.106305	11384	17	2	670	5	8	2	4	31	236	0.997425	B063-020719-01.fasta	W081___17___2___670___5___8___2___4___236___31	226	460.528	7	gltA,porA	248147	0	7	W081	aspA,glnA,glyA,pgm,tkt,uncA,fn_gyrA	100	100	1	EUROPE
W081	1481-31-1836	0.020618	1481	35	5	9	5	8	2	2	31	1836	0.994664	B336-070621-02.fasta	W081___35___5___9___5___8___2___2___1836___31	739	439.525	6	aspA,glnA,porA	181125	4	2	W081	gltA,glyA,pgm,tkt,uncA,fn_gyrA	100	92.7067	14	EUROPE
W082	45-7-49	0.084161	45	4	7	10	4	1	7	1	7	49	0.994046	B037-110619-01.fasta	W082___4___7___10___4___1___7___1___49___7	58	367.727	9		53546	0	9	W082	aspA,glnA,gltA,glyA,pgm,tkt,uncA,porA,fn_gyrA	100	100	2	EUROPE
W083	6591-11-1634	0.029774	6591	64	105	20	77	94	103	16	11	1634	0.991184	B121-270819-02.fasta	W083___64___105___20___77___94___103___16___1634___11	724	265.934	7	glnA,gltA	15404	1	6	W083	aspA,glyA,pgm,tkt,uncA,porA,fn_gyrA	100	90.9486	9	EUROPE
W083	1231-31-270	0.029282	1231	27	2	22	104	43	86	31	31	270	0.991501	42085.fasta	W083___27___2___22___104___43___86___31___270___31	536	300.682	7	aspA,uncA	21781	1	6	W083	glnA,gltA,glyA,pgm,tkt,porA,fn_gyrA	100	88.2143	10	EUROPE
W083	177-80-1836	0.024487	177	17	2	8	5	8	2	4	80	1836	0.992754	79263.fasta	W083___17___2___8___5___8___2___4___1836___80	698	283.356	7	porA,fn_gyrA	25084	1	6	W083	aspA,glnA,gltA,glyA,pgm,tkt,uncA	99.9671	99.5014	17	EUROPE
W084	1231-31-270	0.213993	1231	27	2	22	104	43	86	31	31	270	0.997895	42085.fasta	W084___27___2___22___104___43___86___31___270___31	536	484.422	7	aspA,fn_gyrA	237312	0	7	W084	glnA,gltA,glyA,pgm,tkt,uncA,porA	100	100	1	EUROPE
W084	2333-9-131	0.0192	2333	7	4	1	2	11	1	5	9	131	0.993986	30736.fasta	W084___7___4___1___2___11___1___5___131___9	187	272.765	2	aspA,glnA,gltA,glyA,pgm,porA,fn_gyrA	5326	0	2	W084	tkt,uncA	100	93.135	16	EUROPE
W087	267-1-73	0.668439	267	4	7	40	4	42	51	1	1	73	0.999928	B339-070621-01.fasta	W087___4___7___40___4___42___51___1___73___1	21	488.201	9		1387262	0	9	W087	aspA,glnA,gltA,glyA,pgm,tkt,uncA,porA,fn_gyrA	100	100	1	EUROPE
W087	4570-37-1795	0.092687	4570	64	22	20	100	242	204	16	37	1795	0.999942	B320-050521-02.fasta	W087___64___22___20___100___242___204___16___1795___37	733	468.469	9		199976	1	8	W087	aspA,glnA,gltA,glyA,pgm,tkt,uncA,porA,fn_gyrA	100	98.23	2	EUROPE
W087	10102-11-2366	0.02826	10102	64	22	203	100	134	160	60	11	2366	0.999467	W087-210621-01.fasta	W087___64___22___203___100___134___160___60___2366___11	299	391.492	9		97378	3	6	W087	aspA,glnA,gltA,glyA,pgm,tkt,uncA,porA,fn_gyrA	100	90.4711	3	EUROPE
B015	45-7-467	0.964241	45	4	7	10	4	1	7	1	7	467	0.999405	107511.fasta	B015___4___7___10___4___1___7___1___467___7	193	490.637	9		11621274	0	9	B015	aspA,glnA,gltA,glyA,pgm,tkt,uncA,porA,fn_gyrA	100	100	1	NO_INHOUSE
B021	48-3-7	0.532037	48	2	4	1	2	7	1	5	3	7	0.999534	6112.fasta	B021___2___4___1___2___7___1___5___7___3	2	490.924	9		1989308	0	9	21-B021	aspA,glnA,gltA,glyA,pgm,tkt,uncA,porA,fn_gyrA	100	100	1	NO_INHOUSE
B023	448-31-2034	0.907665	448	61	70	22	18	2	74	47	31	2034	0.997241	61220.fasta	B023___61___70___22___18___2___74___47___2034___31	852	427.105	8	porA	2502448	0	8	21-B023	aspA,glnA,gltA,glyA,pgm,tkt,uncA,fn_gyrA	100	95.7913	1	NO_INHOUSE
B025	45-7-49	0.895449	45	4	7	10	4	1	7	1	7	49	0.999368	57462.fasta	B025___4___7___10___4___1___7___1___49___7	101	493.452	9		719006	0	9	B25	aspA,glnA,gltA,glyA,pgm,tkt,uncA,porA,fn_gyrA	100	100	1	NO_INHOUSE
B026	448-31-2034	0.898355	448	61	70	22	18	2	74	47	31	2034	0.997327	61220.fasta	B026___61___70___22___18___2___74___47___2034___31	852	471.836	7	porA,fn_gyrA	2308732	0	7	21-B026	aspA,glnA,gltA,glyA,pgm,tkt,uncA	100	100	1	NO_INHOUSE
B027	677-19-276	0.842249	677	10	81	50	99	120	76	52	19	276	0.999958	59177.fasta	B027___10___81___50___99___120___76___52___276___19	103	491.975	9		4842611	0	9	21-B027	aspA,glnA,gltA,glyA,pgm,tkt,uncA,porA,fn_gyrA	100	100	1	NO_INHOUSE
B027	951-31-2358	0.151705	951	18	100	82	24	138	116	63	31	2358	0.999915	48448.fasta	B027___18___100___82___24___138___116___63___2358___31	788	484.21	8	aspA	642920	0	8	21-B027	glnA,gltA,glyA,pgm,tkt,uncA,porA,fn_gyrA	100	100	2	NO_INHOUSE
B028	951-31-2358	0.719608	951	18	100	82	24	138	116	63	31	2358	1	48448.fasta	B028___18___100___82___24___138___116___63___2358___31	788	494.346	9		6521825	0	9	B028	aspA,glnA,gltA,glyA,pgm,tkt,uncA,porA,fn_gyrA	100	100	1	NO_INHOUSE
B028	2491-11-1157	0.176496	2491	64	22	212	100	134	233	16	11	1157	0.995924	22260.fasta	B028___64___22___212___100___134___233___16___1157___11	685	459.022	7	aspA,porA	952771	0	7	B028	glnA,gltA,glyA,pgm,tkt,uncA,fn_gyrA	100	98.3829	2	NO_INHOUSE
B029	448-31-451	0.603074	448	61	70	22	18	2	74	47	31	451	0.994915	46554.fasta	B029___61___70___22___18___2___74___47___451___31	781	474.749	8	porA	3272945	0	8	21-B029	aspA,glnA,gltA,glyA,pgm,tkt,uncA,fn_gyrA	100	100	1	NO_INHOUSE
B035	7831-380-4439	0.410093	7831	64	22	85	98	652	270	60	380	4439	0.999831	33960.fasta	B035___64___22___85___98___652___270___60___4439___380	733	490.447	9		947400	0	9	21-B035	aspA,glnA,gltA,glyA,pgm,tkt,uncA,porA,fn_gyrA	100	100	1	NO_INHOUSE
B035	6427-11-1157	0.124838	6427	64	95	20	100	514	101	60	11	1157	0.999958	78916.fasta	B035___64___95___20___100___514___101___60___1157___11	909	472.602	9		550647	2	7	21-B035	aspA,glnA,gltA,glyA,pgm,tkt,uncA,porA,fn_gyrA	100	97.0667	2	NO_INHOUSE
B035	7813-11-2532	0.066163	7813	64	89	20	98	134	593	16	11	2532	0.997503	33945.fasta	B035___64___89___20___98___134___593___16___2532___11	729	470.972	6	glnA,tkt,porA	713975	4	2	21-B035	aspA,gltA,glyA,pgm,uncA,fn_gyrA	100	100	3	NO_INHOUSE
B035	11002-99-2347	0.019503	11002	258	174	207	193	336	314	131	99	2347	0.995176	108833.fasta	B035___258___174___207___193___336___314___131___2347___99	418	286.75	5	glnA,tkt,porA,fn_gyrA	14057	0	5	21-B035	aspA,gltA,glyA,pgm,uncA	100	90.232	11	NO_INHOUSE
B035	7825-298-4437	0.012389	7825	258	174	474	193	753	595	131	298	4437	0.995937	33954.fasta	B035___258___174___474___193___753___595___131___4437___298	731	422.481	5	glnA,gltA,pgm,tkt	21056	3	2	21-B035	aspA,glyA,uncA,porA,fn_gyrA	100	99.07	15	NO_INHOUSE
B036	1540-40-1353	0.196516	1540	76	33	22	104	43	109	31	40	1353	0.998347	50086.fasta	B036___76___33___22___104___43___109___31___1353___40	796	469.498	8	porA	1665836	0	8	B036	aspA,glnA,gltA,glyA,pgm,tkt,uncA,fn_gyrA	100	100	1	NO_INHOUSE
B036	7836-99-2347	0.056603	7836	258	174	207	193	336	314	229	99	2347	0.999576	33965.fasta	B036___258___174___207___193___336___314___229___2347___99	418	455.086	9		295978	0	9	B036	aspA,glnA,gltA,glyA,pgm,tkt,uncA,porA,fn_gyrA	100	99.5089	4	NO_INHOUSE
B036	9407-384-406	0.051216	9407	64	22	77	97	122	301	16	384	406	0.996991	77328.fasta	B036___64___22___77___97___122___301___16___406___384	271	290.331	6	pgm,porA,fn_gyrA	1111265	1	5	B036	aspA,glnA,gltA,glyA,tkt,uncA	99.95	86.4883	5	NO_INHOUSE
B036	2753-11-579	0.043714	2753	64	22	85	98	134	54	16	11	579	0.997754	43659.fasta	B036___64___22___85___98___134___54___16___579___11	776	464.541	8	glyA	1688441	3	5	B036	aspA,glnA,gltA,pgm,tkt,uncA,porA,fn_gyrA	100	100	6	NO_INHOUSE
B036	4835-11-1224	0.027743	4835	64	89	319	100	94	103	16	11	1224	0.997373	10778.fasta	B036___64___89___319___100___94___103___16___1224___11	416	488.766	5	glnA,gltA,tkt,porA	1448258	3	2	B036	aspA,glyA,pgm,uncA,fn_gyrA	100	100	10	NO_INHOUSE
B037	6427-11-1157	0.221621	6427	64	95	20	100	514	101	60	11	1157	0.999279	78916.fasta	B037___64___95___20___100___514___101___60___1157___11	909	472.456	9		640141	0	9	B037	aspA,glnA,gltA,glyA,pgm,tkt,uncA,porA,fn_gyrA	100	99.8067	1	NO_INHOUSE
B037	45-7-180	0.06814	45	4	7	10	4	1	7	1	7	180	0.998939	107526.fasta	B037___4___7___10___4___1___7___1___180___7	87	443.105	8	porA	310164	0	8	B037	aspA,glnA,gltA,glyA,pgm,tkt,uncA,fn_gyrA	100	97.6813	2	NO_INHOUSE
B037	7805-11-2367	0.050617	7805	64	22	85	98	134	101	16	11	2367	0.997624	33933.fasta	B037___64___22___85___98___134___101___16___2367___11	725	490.899	8	gltA	1025884	3	5	B037	aspA,glnA,glyA,pgm,tkt,uncA,porA,fn_gyrA	100	98.8388	3	NO_INHOUSE
B037	6390-11-3122	0.041182	6390	64	133	20	100	134	160	16	11	3122	0.996606	78910.fasta	B037___64___133___20___100___134___160___16___3122___11	907	426.07	8	porA	1000871	6	2	B037	aspA,glnA,gltA,glyA,pgm,tkt,uncA,fn_gyrA	100	95.3875	5	NO_INHOUSE
B037	8816-11-4462	0.036986	8816	64	105	85	98	652	54	60	11	4462	0.996649	107332.fasta	B037___64___105___85___98___652___54___60___4462___11	570	464.794	6	glnA,gltA,porA	901756	4	2	B037	aspA,glyA,pgm,tkt,uncA,fn_gyrA	100	100	7	NO_INHOUSE
B037	7851-152-2535	0.030123	7851	64	22	71	100	134	187	60	152	2535	0.99563	34080.fasta	B037___64___22___71___100___134___187___60___2535___152	743	392.703	7	tkt,porA	372972	5	2	B037	aspA,glnA,gltA,glyA,pgm,uncA,fn_gyrA	99.9657	96.4157	14	NO_INHOUSE
B038	3534-60-1544	0.18257	3534	64	81	111	143	134	153	16	60	1544	0.997543	16124.fasta	B038___64___81___111___143___134___153___16___1544___60	328	455.067	7	porA,fn_gyrA	827032	0	7	21-B038	aspA,glnA,gltA,glyA,pgm,tkt,uncA	100	97.9757	1	NO_INHOUSE
B038	8343-145-1705	0.165938	8343	64	33	22	100	122	17	16	145	1705	0.992883	32917.fasta	B038___64___33___22___100___122___17___16___1705___145	721	450.06	5	gltA,pgm,porA,fn_gyrA	1164537	2	3	21-B038	aspA,glnA,glyA,tkt,uncA	100	100	2	NO_INHOUSE
B038	6460-11-1705	0.031244	6460	64	33	22	98	94	17	16	11	1705	0.992247	78887.fasta	B038___64___33___22___98___94___17___16___1705___11	901	477.378	6	gltA,glyA,porA	1485976	4	2	21-B038	aspA,glnA,pgm,tkt,uncA,fn_gyrA	100	100	9	NO_INHOUSE
B038	8754-11-348	0.025788	8754	277	22	20	143	123	54	16	11	348	0.993179	59338.fasta	B038___277___22___20___143___123___54___16___348___11	480	456.375	5	aspA,pgm,tkt,porA	726702	3	2	21-B038	glnA,gltA,glyA,uncA,fn_gyrA	100	97.712	10	NO_INHOUSE
B039	4835-11-1224	0.772399	4835	64	89	319	100	94	103	16	11	1224	0.999448	10778.fasta	B039___64___89___319___100___94___103___16___1224___11	416	448.672	9		4645015	0	9	21-B039	aspA,glnA,gltA,glyA,pgm,tkt,uncA,porA,fn_gyrA	100	96.3411	1	NO_INHOUSE
B039	2491-11-1157	0.030302	2491	64	22	212	100	134	233	16	11	1157	0.996007	22260.fasta	B039___64___22___212___100___134___233___16___1157___11	685	439.709	7	tkt,porA	2844560	4	3	21-B039	aspA,glnA,gltA,glyA,pgm,uncA,fn_gyrA	100	98.07	2	NO_INHOUSE
B039	7805-11-2367	0.023439	7805	64	22	85	98	134	101	16	11	2367	0.994903	33933.fasta	B039___64___22___85___98___134___101___16___2367___11	725	363.572	7	gltA,porA	2258104	5	2	21-B039	aspA,glnA,glyA,pgm,tkt,uncA,fn_gyrA	100	89.8786	3	NO_INHOUSE
B039	11002-99-2347	0.017365	11002	258	174	207	193	336	314	131	99	2347	0.993714	108833.fasta	B039___258___174___207___193___336___314___131___2347___99	418	478.615	5	gltA,pgm,tkt,fn_gyrA	127372	0	5	21-B039	aspA,glnA,glyA,uncA,porA	100	99.462	4	NO_INHOUSE
B039	7851-152-2535	0.013034	7851	64	22	71	100	134	187	60	152	2535	0.995455	34080.fasta	B039___64___22___71___100___134___187___60___2535___152	743	535.903	7	tkt,porA	1761844	4	3	21-B039	aspA,glnA,gltA,glyA,pgm,uncA,fn_gyrA	99.9514	93.53	6	NO_INHOUSE
B045	464-3-2178	0.606812	464	24	2	2	2	10	3	1	3	2178	0.995888	108318.fasta	B045___24___2___2___2___10___3___1___2178___3	68	462.407	9		3467946	0	9	B045	aspA,glnA,gltA,glyA,pgm,tkt,uncA,porA,fn_gyrA	99.9722	95.8633	1	NO_INHOUSE
B047	19-8-327	0.524822	19	2	1	5	3	2	1	5	8	327	0.995501	28983.fasta	B047___2___1___5___3___2___1___5___327___8	138	490.611	9		6990574	0	9	B047	aspA,glnA,gltA,glyA,pgm,tkt,uncA,porA,fn_gyrA	100	100	1	NO_INHOUSE
B050	1080-74-130	0.148031	1080	10	2	107	137	120	76	1	74	130	0.997497	42536.fasta	B050___10___2___107___137___120___76___1___130___74	308	473.991	9		894039	0	9	B050	aspA,glnA,gltA,glyA,pgm,tkt,uncA,porA,fn_gyrA	100	100	1	NO_INHOUSE
B050	7837-384-4466	0.084263	7837	64	22	212	97	122	301	16	384	4466	0.992788	33966.fasta	B050___64___22___212___97___122___301___16___4466___384	271	360.513	4	gltA,glyA,pgm,tkt,porA	1992067	0	4	B050	aspA,glnA,uncA,fn_gyrA	99.9125	89.365	2	NO_INHOUSE
B050	6590-11-2372	0.082533	6590	64	95	77	98	134	94	16	11	2372	0.992025	78898.fasta	B050___64___95___77___98___134___94___16___2372___11	902	400.791	5	gltA,glyA,pgm,porA	1991767	2	3	B050	aspA,glnA,tkt,uncA,fn_gyrA	100	85.056	3	NO_INHOUSE
B050	7851-152-2535	0.066575	7851	64	22	71	100	134	187	60	152	2535	0.991898	34080.fasta	B050___64___22___71___100___134___187___60___2535___152	743	477.448	4	gltA,pgm,uncA,porA,fn_gyrA	2575057	2	2	B050	aspA,glnA,glyA,tkt	100	100	4	NO_INHOUSE
B050	7893-11-498	0.027317	7893	64	22	68	100	134	593	518	11	498	0.991304	34078.fasta	B050___64___22___68___100___134___593___518___498___11	742	324.99	7	pgm,porA	2650459	4	3	B050	aspA,glnA,gltA,glyA,tkt,uncA,fn_gyrA	99.9614	88.6	11	NO_INHOUSE
B050	7825-298-4437	0.021502	7825	258	174	474	193	753	595	131	298	4437	0.991176	33954.fasta	B050___258___174___474___193___753___595___131___4437___298	731	309.539	5	gltA,pgm,tkt,porA	108518	0	5	B050	aspA,glnA,glyA,uncA,fn_gyrA	100	90.406	16	NO_INHOUSE
B051	1309-60-406	0.445597	1309	18	81	111	143	134	153	16	60	406	0.997965	48453.fasta	B051___18___81___111___143___134___153___16___406___60	328	482.93	6	gltA,porA,fn_gyrA	565334	0	6	21-B051	aspA,glnA,glyA,pgm,tkt,uncA	100	100	1	NO_INHOUSE
B051	2401-11-1096	0.258038	2401	64	105	20	287	94	103	16	11	1096	0.999703	16380.fasta	B051___64___105___20___287___94___103___16___1096___11	676	464.049	8	porA	399563	2	6	21-B051	aspA,glnA,gltA,glyA,pgm,tkt,uncA,fn_gyrA	100	97.5362	2	NO_INHOUSE
B051	6591-11-1634	0.038097	6591	64	105	20	77	94	103	16	11	1634	0.996524	69254.fasta	B051___64___105___20___77___94___103___16___1634___11	873	490.219	9		466481	7	2	21-B051	aspA,glnA,gltA,glyA,pgm,tkt,uncA,porA,fn_gyrA	100	99.3356	3	NO_INHOUSE
B052	7805-11-2367	0.087615	7805	64	22	85	98	134	101	16	11	2367	0.998262	33933.fasta	B052___64___22___85___98___134___101___16___2367___11	725	463.086	8	gltA	1900600	0	8	21-B052	aspA,glnA,glyA,pgm,tkt,uncA,porA,fn_gyrA	100	96.3512	1	NO_INHOUSE
B052	6427-11-1157	0.086861	6427	64	95	20	100	514	101	60	11	1157	0.999491	78916.fasta	B052___64___95___20___100___514___101___60___1157___11	909	454.316	9		1038261	3	6	21-B052	aspA,glnA,gltA,glyA,pgm,tkt,uncA,porA,fn_gyrA	100	97.3967	2	NO_INHOUSE
B052	2753-11-579	0.082453	2753	64	22	85	98	134	54	16	11	579	0.997286	43659.fasta	B052___64___22___85___98___134___54___16___579___11	776	461.163	8	gltA	1913972	6	2	21-B052	aspA,glnA,glyA,pgm,tkt,uncA,porA,fn_gyrA	100	96.3512	3	NO_INHOUSE
B052	7811-11-2366	0.073162	7811	64	133	203	142	134	160	60	11	2366	0.996396	33939.fasta	B052___64___133___203___142___134___160___60___2366___11	727	401.063	6	glnA,glyA,porA	1375832	4	2	21-B052	aspA,gltA,pgm,tkt,uncA,fn_gyrA	100	94.6617	4	NO_INHOUSE
B052	2401-11-1096	0.032721	2401	64	105	20	287	94	103	16	11	1096	0.995421	16380.fasta	B052___64___105___20___287___94___103___16___1096___11	676	432.968	6	glyA,tkt,porA	1160137	4	2	21-B052	aspA,glnA,gltA,pgm,uncA,fn_gyrA	100	95.3183	10	NO_INHOUSE
B052	7837-384-4466	0.020258	7837	64	22	212	97	122	301	16	384	4466	0.995463	33966.fasta	B052___64___22___212___97___122___301___16___4466___384	271	361.964	5	glyA,pgm,porA,fn_gyrA	1022316	3	2	21-B052	aspA,glnA,gltA,tkt,uncA	100	97.472	17	NO_INHOUSE
B054	7882-36-2357	0.891888	7882	64	583	22	111	122	303	16	36	2357	1	34069.fasta	B054___64___583___22___111___122___303___16___2357___36	738	493.643	9		5892726	0	9	B054	aspA,glnA,gltA,glyA,pgm,tkt,uncA,porA,fn_gyrA	100	100	1	NO_INHOUSE
B054	801-36-127	0.074611	801	64	70	68	97	122	106	16	36	127	0.999703	6083.fasta	B054___64___70___68___97___122___106___16___127___36	849	473.857	9		2851339	4	5	B054	aspA,glnA,gltA,glyA,pgm,tkt,uncA,porA,fn_gyrA	100	100	2	NO_INHOUSE
B063	583-1-44	0.28756	583	4	7	10	4	42	51	1	1	44	0.999745	IN_Cj_FI_143_innuendo.fasta	B063___4___7___10___4___42___51___1___44___1	52	488.284	9		3654386	0	9	21-B063	aspA,glnA,gltA,glyA,pgm,tkt,uncA,porA,fn_gyrA	100	100	1	NO_INHOUSE
B063	4529-7-44	0.168113	4529	4	7	10	4	1	7	300	7	44	0.999406	61375.fasta	B063___4___7___10___4___1___7___300___44___7	28	532.441	9		3859892	6	3	21-B063	aspA,glnA,gltA,glyA,pgm,tkt,uncA,porA,fn_gyrA	99.9556	94.4789	2	NO_INHOUSE
B063	177-31-236	0.128246	177	17	2	8	5	8	2	4	31	236	0.997496	61999.fasta	B063___17___2___8___5___8___2___4___236___31	116	435.391	9		981599	0	9	21-B063	aspA,glnA,gltA,glyA,pgm,tkt,uncA,porA,fn_gyrA	100	96.39	3	NO_INHOUSE
B063	22-1-70	0.052687	22	1	3	6	4	3	3	3	1	70	0.999151	14651.fasta	B063___1___3___6___4___3___3___3___70___1	22	326.29	9		897586	2	7	21-B063	aspA,glnA,gltA,glyA,pgm,tkt,uncA,porA,fn_gyrA	100	94.8633	5	NO_INHOUSE
B067	1080-74-130	0.606473	1080	10	2	107	137	120	76	1	74	130	0.997069	42536.fasta	B067___10___2___107___137___120___76___1___130___74	308	491.499	9		5382798	0	9	21-B067	aspA,glnA,gltA,glyA,pgm,tkt,uncA,porA,fn_gyrA	100	100	1	NO_INHOUSE
B067	383-1-73	0.174719	383	4	7	12	4	42	51	1	1	73	0.99966	30778.fasta	B067___4___7___12___4___42___51___1___73___1	52	470.969	9		1632758	1	8	21-B067	aspA,glnA,gltA,glyA,pgm,tkt,uncA,porA,fn_gyrA	100	99.6511	2	NO_INHOUSE
B068	383-1-73	0.746601	383	4	7	12	4	42	51	1	1	73	0.999703	30778.fasta	B068___4___7___12___4___42___51___1___73___1	52	489.246	9		4780879	0	9	21-B068	aspA,glnA,gltA,glyA,pgm,tkt,uncA,porA,fn_gyrA	100	100	1	NO_INHOUSE
B068	11224-7-49	0.032083	11224	4	7	667	4	1	7	1	7	49	0.99754	85135.fasta	B068___4___7___667___4___1___7___1___49___7	101	426.795	7	gltA,porA	2278418	5	2	21-B068	aspA,glnA,glyA,pgm,tkt,uncA,fn_gyrA	100	94.7029	4	NO_INHOUSE
B071	45-7-44	0.473936	45	4	7	10	4	1	7	1	7	44	0.996389	42542.fasta	B071___4___7___10___4___1___7___1___44___7	28	492.27	9		3624385	0	9	21-B071	aspA,glnA,gltA,glyA,pgm,tkt,uncA,porA,fn_gyrA	100	100	1	NO_INHOUSE
B076	383-1-73	0.872746	383	4	7	12	4	42	51	1	1	73	0.999576	30778.fasta	B076___4___7___12___4___42___51___1___73___1	52	489.292	9		4999472	0	9	21-B076	aspA,glnA,gltA,glyA,pgm,tkt,uncA,porA,fn_gyrA	100	100	1	NO_INHOUSE
B077	383-1-73	0.873023	383	4	7	12	4	42	51	1	1	73	0.999533	30778.fasta	B077___4___7___12___4___42___51___1___73___1	52	489.358	9		5658226	0	9	21-B077	aspA,glnA,gltA,glyA,pgm,tkt,uncA,porA,fn_gyrA	100	100	1	NO_INHOUSE
B078	383-1-73	0.81878	383	4	7	12	4	42	51	1	1	73	0.999576	30778.fasta	B078___4___7___12___4___42___51___1___73___1	52	489.22	9		3360253	0	9	21-B078	aspA,glnA,gltA,glyA,pgm,tkt,uncA,porA,fn_gyrA	100	100	1	NO_INHOUSE
B080	383-1-73	0.850511	383	4	7	12	4	42	51	1	1	73	0.999533	30778.fasta	B080___4___7___12___4___42___51___1___73___1	52	489.236	9		3207222	0	9	21-B080	aspA,glnA,gltA,glyA,pgm,tkt,uncA,porA,fn_gyrA	100	100	1	NO_INHOUSE
B082	383-1-73	0.868056	383	4	7	12	4	42	51	1	1	73	0.999533	30778.fasta	B082___4___7___12___4___42___51___1___73___1	52	489.381	9		1798330	0	9	21-B082	aspA,glnA,gltA,glyA,pgm,tkt,uncA,porA,fn_gyrA	100	100	1	NO_INHOUSE
B083	383-1-73	0.871329	383	4	7	12	4	42	51	1	1	73	0.999533	30778.fasta	B083___4___7___12___4___42___51___1___73___1	52	489.379	9		4291952	0	9	21-B083	aspA,glnA,gltA,glyA,pgm,tkt,uncA,porA,fn_gyrA	100	100	1	NO_INHOUSE
B086	383-1-73	0.865102	383	4	7	12	4	42	51	1	1	73	0.999576	30778.fasta	B086___4___7___12___4___42___51___1___73___1	52	489.285	9		1914340	0	9	21-B086	aspA,glnA,gltA,glyA,pgm,tkt,uncA,porA,fn_gyrA	100	100	1	NO_INHOUSE
B096	951-31-2358	1	951	18	100	82	24	138	116	63	31	2358	0.999915	48448.fasta	B096___18___100___82___24___138___116___63___2358___31	788	496.241	9		2110629	0	9	21-B096	aspA,glnA,gltA,glyA,pgm,tkt,uncA,porA,fn_gyrA	100	100	1	NO_INHOUSE
B100	383-1-73	0.906916	383	4	7	12	4	42	51	1	1	73	0.999622	30778.fasta	B100___4___7___12___4___42___51___1___73___1	52	489.42	9		569431	0	9	B100	aspA,glnA,gltA,glyA,pgm,tkt,uncA,porA,fn_gyrA	100	100	1	NO_INHOUSE
B103	383-1-73	0.859738	383	4	7	12	4	42	51	1	1	73	0.999745	30778.fasta	B103___4___7___12___4___42___51___1___73___1	52	489.268	9		3072627	0	9	21-B103	aspA,glnA,gltA,glyA,pgm,tkt,uncA,porA,fn_gyrA	100	100	1	NO_INHOUSE
B103	11384-31-236	0.040368	11384	17	2	670	5	8	2	4	31	236	0.99669	111041.fasta	B103___17___2___670___5___8___2___4___236___31	116	407.096	8	glnA	80410	0	8	21-B103	aspA,gltA,glyA,pgm,tkt,uncA,porA,fn_gyrA	100	95.0312	3	NO_INHOUSE
B112	7882-36-2357	1	7882	64	583	22	111	122	303	16	36	2357	1	34069.fasta	B112___64___583___22___111___122___303___16___2357___36	738	495.14	9		3159542	0	9	21-B112	aspA,glnA,gltA,glyA,pgm,tkt,uncA,porA,fn_gyrA	100	100	1	NO_INHOUSE
B121	6591-11-1634	1	6591	64	105	20	77	94	103	16	11	1634	1	69254.fasta	B121___64___105___20___77___94___103___16___1634___11	873	495.302	9		2208442	0	9	21-B121	aspA,glnA,gltA,glyA,pgm,tkt,uncA,porA,fn_gyrA	100	100	1	NO_INHOUSE
B122	19-8-327	0.525709	19	2	1	5	3	2	1	5	8	327	0.997947	28983.fasta	B122___2___1___5___3___2___1___5___327___8	138	492.107	9		298155	0	9	21-B122	aspA,glnA,gltA,glyA,pgm,tkt,uncA,porA,fn_gyrA	100	100	1	NO_INHOUSE
B123	19-8-327	0.559601	19	2	1	5	3	2	1	5	8	327	0.995757	28983.fasta	B123___2___1___5___3___2___1___5___327___8	138	492.207	9		578911	0	9	B123	aspA,glnA,gltA,glyA,pgm,tkt,uncA,porA,fn_gyrA	100	100	1	NO_INHOUSE
B155	699-4-3232	0.266912	699	37	52	57	26	129	29	23	4	3232	0.996356	81867.fasta	B155___37___52___57___26___129___29___23___3232___4	293	470.89	7	pgm,porA	2652263	0	7	21-B155	aspA,glnA,gltA,glyA,tkt,uncA,fn_gyrA	100	100	1	NO_INHOUSE
B158	5479-40-858	0.642609	5479	76	105	284	104	43	269	31	40	858	0.994759	107149.fasta	B158___76___105___284___104___43___269___31___858___40	398	518.433	6	gltA,pgm,tkt	1178546	0	6	21-B158	aspA,glnA,glyA,uncA,porA,fn_gyrA	100	100	1	NO_INHOUSE
B167	1044-27-25	0.939944	1044	2	10	2	4	19	3	6	27	25	0.999456	6361.fasta	B167___2___10___2___4___19___3___6___25___27	49	492.041	9		346243	0	9	21-B167	aspA,glnA,gltA,glyA,pgm,tkt,uncA,porA,fn_gyrA	100	100	1	NO_INHOUSE
B189	11-7-217	0.534383	11	48	7	10	4	1	7	1	7	217	0.992864	107474.fasta	B189___48___7___10___4___1___7___1___217___7	318	488.214	9		10731339	0	9	B189	aspA,glnA,gltA,glyA,pgm,tkt,uncA,porA,fn_gyrA	100	100	1	NO_INHOUSE
B190	45-7-231	0.071459	45	4	7	10	4	1	7	1	7	231	0.995758	16111.fasta	B190___4___7___10___4___1___7___1___231___7	78	437.125	7	aspA,porA	261314	0	7	21-B190	glnA,gltA,glyA,pgm,tkt,uncA,fn_gyrA	100	97.1829	3	NO_INHOUSE
B190	3727-7-217	0.060172	3727	48	7	10	4	183	7	1	7	217	0.996861	107611.fasta	B190___48___7___10___4___183___7___1___217___7	318	455.311	9		404979	6	3	21-B190	aspA,glnA,gltA,glyA,pgm,tkt,uncA,porA,fn_gyrA	100	97.8089	4	NO_INHOUSE
B194	8614-36-6	0.997147	8614	2	1	4	28	58	672	58	36	6	0.999873	80888.fasta	B194___2___1___4___28___58___672___58___6___36	178	492.184	9		4634237	0	9	21-B194	aspA,glnA,gltA,glyA,pgm,tkt,uncA,porA,fn_gyrA	100	100	1	NO_INHOUSE
B198	8614-36-6	0.997538	8614	2	1	4	28	58	672	58	36	6	0.999915	80888.fasta	B198___2___1___4___28___58___672___58___6___36	178	492.2	9		2522676	0	9	21-B198	aspA,glnA,gltA,glyA,pgm,tkt,uncA,porA,fn_gyrA	100	100	1	NO_INHOUSE
B203	11385-80-203	0.738868	11385	4	43	9	5	8	46	21	80	203	0.998772	111042.fasta	B203___4___43___9___5___8___46___21___203___80	208	496.177	9		4154178	0	9	21-B203	aspA,glnA,gltA,glyA,pgm,tkt,uncA,porA,fn_gyrA	100	100	1	NO_INHOUSE
B203	677-19-276	0.01485	677	10	81	50	99	120	76	52	19	276	0.999788	59177.fasta	B203___10___81___50___99___120___76___52___276___19	103	343.227	9		64309	0	9	21-B203	aspA,glnA,gltA,glyA,pgm,tkt,uncA,porA,fn_gyrA	100	92.12	5	NO_INHOUSE
B221	1294-13-152	0.790849	1294	2	59	96	48	131	24	57	13	152	0.998558	107539.fasta	B221___2___59___96___48___131___24___57___152___13	260	492.158	9		2224645	0	9	21-B221	aspA,glnA,gltA,glyA,pgm,tkt,uncA,porA,fn_gyrA	100	100	1	NO_INHOUSE
B300	1080-74-130	0.804606	1080	10	2	107	137	120	76	1	74	130	0.993806	42536.fasta	B300___10___2___107___137___120___76___1___130___74	308	491.961	9		4805983	0	9	B300	aspA,glnA,gltA,glyA,pgm,tkt,uncA,porA,fn_gyrA	100	100	1	NO_INHOUSE
B318	45-7-180	0.416722	45	4	7	10	4	1	7	1	7	180	0.996902	107526.fasta	B318___4___7___10___4___1___7___1___180___7	87	474.91	8	porA	3342502	0	8	B318	aspA,glnA,gltA,glyA,pgm,tkt,uncA,fn_gyrA	100	100	1	NO_INHOUSE
B320	1539-11-4468	0.731748	1539	64	22	22	100	242	204	16	11	4468	0.994611	78909.fasta	B320___64___22___22___100___242___204___16___4468___11	359	417.467	7	gltA,porA	1449378	0	7	B320	aspA,glnA,glyA,pgm,tkt,uncA,fn_gyrA	99.9486	93.5771	1	NO_INHOUSE
B321	11383-11-1598	0.904683	11383	64	33	78	18	1136	86	16	11	1598	0.999795	111040.fasta	B321___64___33___78___18___1136___86___16___1598___11	642	495.783	9		124503	0	9	B321	aspA,glnA,gltA,glyA,pgm,tkt,uncA,porA,fn_gyrA	100	100	1	NO_INHOUSE
B325	563-31-2648	0.459294	563	17	5	8	5	8	2	4	31	2648	0.996091	42534.fasta	B325___17___5___8___5___8___2___4___2648___31	116	474.376	8	porA	2023478	0	8	B325	aspA,glnA,gltA,glyA,pgm,tkt,uncA,fn_gyrA	100	100	1	NO_INHOUSE
B325	177-7-909	0.152945	177	17	2	8	5	8	2	4	7	909	0.995198	107173.fasta	B325___17___2___8___5___8___2___4___909___7	399	430.57	9		1889364	7	2	B325	aspA,glnA,gltA,glyA,pgm,tkt,uncA,porA,fn_gyrA	100	93.6633	2	NO_INHOUSE
B326	11383-11-1598	0.420843	11383	64	33	78	18	1136	86	16	11	1598	0.999789	111040.fasta	B326___64___33___78___18___1136___86___16___1598___11	642	494.367	9		1443315	0	9	B326	aspA,glnA,gltA,glyA,pgm,tkt,uncA,porA,fn_gyrA	100	100	1	NO_INHOUSE
B326	1539-11-4468	0.266283	1539	64	22	22	100	242	204	16	11	4468	0.997758	78909.fasta	B326___64___22___22___100___242___204___16___4468___11	359	464.414	8	porA	1021068	3	5	B326	aspA,glnA,gltA,glyA,pgm,tkt,uncA,fn_gyrA	100	99.1287	2	NO_INHOUSE
B326	448-31-451	0.083635	448	61	70	22	18	2	74	47	31	451	0.996828	46554.fasta	B326___61___70___22___18___2___74___47___451___31	781	431.183	8	porA	273155	2	6	B326	aspA,glnA,gltA,glyA,pgm,tkt,uncA,fn_gyrA	100	98.1188	3	NO_INHOUSE
B327	11382-31-1468	0.9968	11382	80	70	164	98	123	229	16	31	1468	0.999788	111039.fasta	B327___80___70___164___98___123___229___16___1468___31	641	496.491	9		3235964	0	9	B327	aspA,glnA,gltA,glyA,pgm,tkt,uncA,porA,fn_gyrA	100	100	1	NO_INHOUSE
B328	6427-11-1157	0.268921	6427	64	95	20	100	514	101	60	11	1157	0.991763	78916.fasta	B328___64___95___20___100___514___101___60___1157___11	909	471.742	6	tkt,porA,fn_gyrA	396007	0	6	B328	aspA,glnA,gltA,glyA,pgm,uncA	100	100	1	NO_INHOUSE
B328	7837-384-406	0.218933	7837	64	22	212	97	122	301	16	384	406	0.990961	34077.fasta	B328___64___22___212___97___122___301___16___406___384	271	420.339	4	gltA,glyA,pgm,uncA,fn_gyrA	222996	1	3	B328	aspA,glnA,tkt,porA	100	89.7275	2	NO_INHOUSE
B329	677-19-276	0.949539	677	10	81	50	99	120	76	52	19	276	0.999958	59177.fasta	B329___10___81___50___99___120___76___52___276___19	103	492.175	9		8307703	0	9	B329	aspA,glnA,gltA,glyA,pgm,tkt,uncA,porA,fn_gyrA	100	100	1	NO_INHOUSE
B330	677-19-276	1	677	10	81	50	99	120	76	52	19	276	0.999915	59177.fasta	B330___10___81___50___99___120___76___52___276___19	103	492.276	9		8877424	0	9	B330	aspA,glnA,gltA,glyA,pgm,tkt,uncA,porA,fn_gyrA	100	100	1	NO_INHOUSE
B331	677-19-276	0.768185	677	10	81	50	99	120	76	52	19	276	0.999915	59177.fasta	B331___10___81___50___99___120___76___52___276___19	103	491.782	9		4855265	0	9	B331	aspA,glnA,gltA,glyA,pgm,tkt,uncA,porA,fn_gyrA	100	100	1	NO_INHOUSE
B331	230-1-217	0.079073	230	4	7	41	4	42	7	1	1	217	0.998089	48452.fasta	B331___4___7___41___4___42___7___1___217___1	52	489.733	6	gltA,pgm,fn_gyrA	457452	0	6	B331	aspA,glnA,glyA,tkt,uncA,porA	100	100	2	NO_INHOUSE
B331	45-30-3204	0.051486	45	4	7	10	4	1	7	1	30	3204	0.997707	42785.fasta	B331___4___7___10___4___1___7___1___3204___30	87	486.298	8	porA	585665	6	2	B331	aspA,glnA,gltA,glyA,pgm,tkt,uncA,fn_gyrA	99.9562	94.6325	3	NO_INHOUSE
B335	6592-11-2846	0.160983	6592	64	467	71	100	134	101	16	11	2846	0.999831	59179.fasta	B335___64___467___71___100___134___101___16___2846___11	842	472.704	7	tkt,porA	592650	0	7	B335	aspA,glnA,gltA,glyA,pgm,uncA,fn_gyrA	100	100	1	NO_INHOUSE
B335	11383-11-1598	0.096506	11383	64	33	78	18	1136	86	16	11	1598	1	111040.fasta	B335___64___33___78___18___1136___86___16___1598___11	642	482.831	9		501980	3	6	B335	aspA,glnA,gltA,glyA,pgm,tkt,uncA,porA,fn_gyrA	100	97.0122	2	NO_INHOUSE
B335	7805-11-2367	0.064081	7805	64	22	85	98	134	101	16	11	2367	0.998434	33933.fasta	B335___64___22___85___98___134___101___16___2367___11	725	509.588	6	gltA,glyA,tkt	641422	4	2	B335	aspA,glnA,pgm,uncA,porA,fn_gyrA	100	100	3	NO_INHOUSE
B335	8510-11-1795	0.056927	8510	64	22	22	100	134	160	16	11	1795	0.999153	48446.fasta	B335___64___22___22___100___134___160___16___1795___11	359	501.61	8	gltA	685240	6	2	B335	aspA,glnA,glyA,pgm,tkt,uncA,porA,fn_gyrA	100	100	4	NO_INHOUSE
B335	7813-11-2532	0.05558	7813	64	89	20	98	134	593	16	11	2532	0.997968	33945.fasta	B335___64___89___20___98___134___593___16___2532___11	729	436.585	6	glyA,tkt,porA	583980	4	2	B335	aspA,glnA,gltA,pgm,uncA,fn_gyrA	100	93.3267	5	NO_INHOUSE
B335	7837-384-4466	0.013603	7837	64	22	212	97	122	301	16	384	4466	0.996995	33966.fasta	B335___64___22___212___97___122___301___16___4466___384	271	416.384	6	glyA,porA,fn_gyrA	429747	4	2	B335	aspA,glnA,gltA,pgm,tkt,uncA	100	88.5317	22	NO_INHOUSE
B336	144-31-204	0.113187	144	17	2	8	5	8	2	21	31	204	0.996822	107176.fasta	B336___17___2___8___5___8___2___21___204___31	400	408.028	5	aspA,glnA,gltA,porA	348812	0	5	B336	glyA,pgm,tkt,uncA,fn_gyrA	100	97.792	1	NO_INHOUSE
B336	2753-11-579	0.106139	2753	64	22	85	98	134	54	16	11	579	0.997585	43659.fasta	B336___64___22___85___98___134___54___16___579___11	776	465.821	6	gltA,glyA,porA	947901	0	6	B336	aspA,glnA,pgm,tkt,uncA,fn_gyrA	100	100	2	NO_INHOUSE
B336	6451-11-348	0.103711	6451	277	105	20	143	134	54	16	11	348	0.999873	50477.fasta	B336___277___105___20___143___134___54___16___348___11	480	481.925	8	gltA	798093	4	4	B336	aspA,glnA,glyA,pgm,tkt,uncA,porA,fn_gyrA	100	97.8512	3	NO_INHOUSE
B336	11378-7-1621	0.050032	11378	35	5	8	51	8	2	21	7	1621	0.995381	111035.fasta	B336___35___5___8___51___8___2___21___1621___7	365	402.209	5	gltA,glyA,porA,fn_gyrA	378114	3	2	B336	aspA,glnA,pgm,tkt,uncA	100	97.792	6	NO_INHOUSE
B336	8808-11-348	0.033973	8808	76	22	212	614	134	54	560	11	348	0.996144	107381.fasta	B336___76___22___212___614___134___54___560___348___11	572	410.071	7	glyA,uncA	549891	5	2	B336	aspA,glnA,gltA,pgm,tkt,porA,fn_gyrA	100	95.5071	9	NO_INHOUSE
B336	7872-11-4468	0.022953	7872	64	22	22	100	134	103	16	11	4468	0.996356	42069.fasta	B336___64___22___22___100___134___103___16___4468___11	359	382.824	7	glyA,porA	750632	5	2	B336	aspA,glnA,gltA,pgm,tkt,uncA,fn_gyrA	100	95.7714	13	NO_INHOUSE
B336	7889-385-4467	0.010653	7889	258	174	497	193	574	615	131	385	4467	0.99394	34071.fasta	B336___258___174___497___193___574___615___131___4467___385	739	339.182	4	gltA,pgm,tkt,porA,fn_gyrA	19099	0	4	B336	aspA,glnA,glyA,uncA	100	99.655	27	NO_INHOUSE
B337	1044-27-25	0.732703	1044	2	10	2	4	19	3	6	27	25	0.999873	6361.fasta	B337___2___10___2___4___19___3___6___25___27	49	491.033	9		1676056	0	9	B337	aspA,glnA,gltA,glyA,pgm,tkt,uncA,porA,fn_gyrA	100	100	1	NO_INHOUSE
B337	11383-11-1598	0.083052	11383	64	33	78	18	1136	86	16	11	1598	1	111040.fasta	B337___64___33___78___18___1136___86___16___1598___11	642	422.276	8	pgm	118670	0	8	B337	aspA,glnA,gltA,glyA,tkt,uncA,porA,fn_gyrA	100	92.9213	2	NO_INHOUSE
B337	8368-39-680	0.038279	8368	27	22	22	104	115	86	31	39	680	0.999958	50656.fasta	B337___27___22___22___104___115___86___31___680___39	481	396.998	9		68658	1	8	B337	aspA,glnA,gltA,glyA,pgm,tkt,uncA,porA,fn_gyrA	100	97.8644	3	NO_INHOUSE
B338	11383-11-1598	0.212916	11383	64	33	78	18	1136	86	16	11	1598	0.999831	111040.fasta	B338___64___33___78___18___1136___86___16___1598___11	642	489.99	9		1534667	0	9	B338	aspA,glnA,gltA,glyA,pgm,tkt,uncA,porA,fn_gyrA	100	100	1	NO_INHOUSE
B338	2753-11-579	0.107817	2753	64	22	85	98	134	54	16	11	579	0.998432	43659.fasta	B338___64___22___85___98___134___54___16___579___11	776	417.711	9		1458192	3	6	B338	aspA,glnA,gltA,glyA,pgm,tkt,uncA,porA,fn_gyrA	100	93.45	2	NO_INHOUSE
B338	7839-11-4440	0.078925	7839	64	89	85	189	134	101	16	11	4440	0.998221	34068.fasta	B338___64___89___85___189___134___101___16___4440___11	737	380.353	7	tkt,porA	1451952	5	2	B338	aspA,glnA,gltA,glyA,pgm,uncA,fn_gyrA	100	96.4057	4	NO_INHOUSE
B339	267-1-73	0.973796	267	4	7	40	4	42	51	1	1	73	0.99983	79262.fasta	B339___4___7___40___4___42___51___1___73___1	52	489.226	9		3232186	0	9	B339	aspA,glnA,gltA,glyA,pgm,tkt,uncA,porA,fn_gyrA	100	100	1	NO_INHOUSE
B342	354-8-957	0.858769	354	8	10	2	2	11	12	6	8	957	1	34524.fasta	B342___8___10___2___2___11___12___6___957___8	30	491.138	8	pgm	4077625	0	8	B342	aspA,glnA,gltA,glyA,tkt,uncA,porA,fn_gyrA	100	100	1	NO_INHOUSE
B342	19-8-7	0.123115	19	2	1	5	3	2	1	5	8	7	1	5889.fasta	B342___2___1___5___3___2___1___5___7___8	34	416.427	9		644213	1	8	B342	aspA,glnA,gltA,glyA,pgm,tkt,uncA,porA,fn_gyrA	100	97.1067	2	NO_INHOUSE
B345	383-1-73	0.544261	383	4	7	12	4	42	51	1	1	73	0.999619	30778.fasta	B345___4___7___12___4___42___51___1___73___1	52	488.814	9		3153635	0	9	B345	aspA,glnA,gltA,glyA,pgm,tkt,uncA,porA,fn_gyrA	100	100	1	NO_INHOUSE
B345	563-31-2648	0.138199	563	17	5	8	5	8	2	4	31	2648	0.99572	42534.fasta	B345___17___5___8___5___8___2___4___2648___31	116	463.271	8	porA	718014	0	8	B345	aspA,glnA,gltA,glyA,pgm,tkt,uncA,fn_gyrA	100	100	2	NO_INHOUSE
B345	177-7-909	0.050975	177	17	2	8	5	8	2	4	7	909	0.994533	107173.fasta	B345___17___2___8___5___8___2___4___909___7	399	434.382	8	glnA	768706	6	2	B345	aspA,gltA,glyA,pgm,tkt,uncA,porA,fn_gyrA	100	97.6562	4	NO_INHOUSE
B353	448-31-451	0.567468	448	61	70	22	18	2	74	47	31	451	0.992078	46554.fasta	B353___61___70___22___18___2___74___47___451___31	781	474.686	8	porA	1103776	0	8	B353	aspA,glnA,gltA,glyA,pgm,tkt,uncA,fn_gyrA	100	100	1	NO_INHOUSE
B354	2162-31-634	0.9029	2162	35	43	8	51	8	2	21	31	634	0.99903	62524.fasta	B354___35___43___8___51___8___2___21___634___31	365	450.26	9		995509	0	9	B354	aspA,glnA,gltA,glyA,pgm,tkt,uncA,porA,fn_gyrA	100	95.6989	1	NO_INHOUSE
B354	677-19-276	0.05649	677	10	81	50	99	120	76	52	19	276	0.999536	59177.fasta	B354___10___81___50___99___120___76___52___276___19	103	406.264	9		24510	0	9	B354	aspA,glnA,gltA,glyA,pgm,tkt,uncA,porA,fn_gyrA	100	86.5667	2	NO_INHOUSE
B355	267-1-73	0.92416	267	4	7	40	4	42	51	1	1	73	0.999703	79262.fasta	B355___4___7___40___4___42___51___1___73___1	52	489.28	9		4929073	0	9	B355	aspA,glnA,gltA,glyA,pgm,tkt,uncA,porA,fn_gyrA	100	100	1	NO_INHOUSE
B355	2162-31-634	0.035241	2162	35	43	8	51	8	2	21	31	634	0.999193	62524.fasta	B355___35___43___8___51___8___2___21___634___31	365	384.095	9		110069	0	9	B355	aspA,glnA,gltA,glyA,pgm,tkt,uncA,porA,fn_gyrA	100	97.8589	2	NO_INHOUSE
B357	11378-7-1621	0.859262	11378	35	5	8	51	8	2	21	7	1621	0.998828	111035.fasta	B357___35___5___8___51___8___2___21___1621___7	365	491.806	9		233548	0	9	B357	aspA,glnA,gltA,glyA,pgm,tkt,uncA,porA,fn_gyrA	100	100	1	NO_INHOUSE
B358	45-7-44	0.325696	45	4	7	10	4	1	7	1	7	44	0.999618	42542.fasta	B358___4___7___10___4___1___7___1___44___7	28	491.99	9		4250671	0	9	B358	aspA,glnA,gltA,glyA,pgm,tkt,uncA,porA,fn_gyrA	100	100	1	NO_INHOUSE
B358	267-288-73	0.160344	267	4	7	40	4	42	51	1	288	73	0.999873	107933.fasta	B358___4___7___40___4___42___51___1___73___288	52	480.084	8	fn_gyrA	2366560	5	3	B358	aspA,glnA,gltA,glyA,pgm,tkt,uncA,porA	100	98.845	2	NO_INHOUSE
B361	230-1-217	0.69439	230	4	7	41	4	42	7	1	1	217	0.999958	48452.fasta	B361___4___7___41___4___42___7___1___217___1	52	492.275	9		4704782	0	9	B361	aspA,glnA,gltA,glyA,pgm,tkt,uncA,porA,fn_gyrA	100	100	1	NO_INHOUSE
B362	267-1-73	0.823138	267	4	7	40	4	42	51	1	1	73	0.999915	79262.fasta	B362___4___7___40___4___42___51___1___73___1	52	489.138	9		2911212	0	9	B362	aspA,glnA,gltA,glyA,pgm,tkt,uncA,porA,fn_gyrA	100	100	1	NO_INHOUSE
B362	677-19-276	0.100886	677	10	81	50	99	120	76	52	19	276	0.999958	59177.fasta	B362___10___81___50___99___120___76___52___276___19	103	461.054	9		200254	0	9	B362	aspA,glnA,gltA,glyA,pgm,tkt,uncA,porA,fn_gyrA	100	99.89	2	NO_INHOUSE
B364	11380-11-200	0.992454	11380	18	33	72	98	116	871	6	11	200	1	111037.fasta	B364___18___33___72___98___116___871___6___200___11	639	493.74	9		778619	0	9	B364	aspA,glnA,gltA,glyA,pgm,tkt,uncA,porA,fn_gyrA	100	100	1	NO_INHOUSE
W021	704-13-886	0.772429	704	2	29	4	27	10	25	57	13	886	0.998676	78951.fasta	W021___2___29___4___27___10___25___57___886___13	226	489.188	9		102585	0	9	21-W021	aspA,glnA,gltA,glyA,pgm,tkt,uncA,porA,fn_gyrA	100	100	1	NO_INHOUSE
W022	683-80-468	0.436166	683	35	43	9	5	121	46	21	80	468	0.998388	42540.fasta	W022___35___43___9___5___121___46___21___468___80	208	489.149	9		2627421	0	9	W022	aspA,glnA,gltA,glyA,pgm,tkt,uncA,porA,fn_gyrA	100	100	1	NO_INHOUSE
W022	11044-10-11	0.025682	11044	4	7	10	5	2	7	1	10	11	0.990118	94139.fasta	W022___4___7___10___5___2___7___1___11___10	997	161.294	5	gltA,pgm,porA,fn_gyrA	282618	2	3	W022	aspA,glnA,glyA,tkt,uncA	99.944	87.018	6	NO_INHOUSE
W026	699-4-3232	0.180736	699	37	52	57	26	129	29	23	4	3232	0.998644	81867.fasta	W026___37___52___57___26___129___29___23___3232___4	293	462.65	7	pgm,porA	268300	0	7	W026	aspA,glnA,gltA,glyA,tkt,uncA,fn_gyrA	100	100	1	NO_INHOUSE
W026	5874-13-180	0.125004	5874	37	52	4	131	127	29	23	13	180	0.998474	80498.fasta	W026___37___52___4___131___127___29___23___180___13	367	419.861	7	glyA,porA	190915	5	2	W026	aspA,glnA,gltA,pgm,tkt,uncA,fn_gyrA	100	97.1929	2	NO_INHOUSE
W026	693-13-819	0.045313	693	2	29	4	48	13	24	57	13	819	0.999364	78944.fasta	W026___2___29___4___48___13___24___57___819___13	190	341.233	8	glyA	64594	2	6	W026	aspA,glnA,gltA,pgm,tkt,uncA,porA,fn_gyrA	100	83.3838	5	NO_INHOUSE
W052	996-4-188	0.683546	996	2	29	84	48	131	25	57	4	188	0.99966	107502.fasta	W052___2___29___84___48___131___25___57___188___4	411	486.29	9		2135215	0	9	W052	aspA,glnA,gltA,glyA,pgm,tkt,uncA,porA,fn_gyrA	100	100	1	NO_INHOUSE
W052	699-4-6	0.242358	699	37	52	57	26	129	29	23	4	6	0.999958	111595.fasta	W052___37___52___57___26___129___29___23___6___4	108	493.887	7	glnA,gltA	575151	2	5	W052	aspA,glyA,pgm,tkt,uncA,porA,fn_gyrA	100	99.57	2	NO_INHOUSE
W053	177-31-4123	0.112551	177	17	2	8	5	8	2	4	31	4123	0.999584	100884.fasta	W053___17___2___8___5___8___2___4___4123___31	116	426.081	8	porA	60475	0	8	W053	aspA,glnA,gltA,glyA,pgm,tkt,uncA,fn_gyrA	100	100	1	NO_INHOUSE
W053	3904-7-2027	0.07664	3904	1	7	10	349	261	7	1	7	2027	0.999751	112078.fasta	W053___1___7___10___349___261___7___1___2027___7	431	350.66	8	aspA	23510	0	8	W053	glnA,gltA,glyA,pgm,tkt,uncA,porA,fn_gyrA	100	92.9013	4	NO_INHOUSE
W054	563-31-2648	0.113165	563	17	5	8	5	8	2	4	31	2648	0.999118	42534.fasta	W054___17___5___8___5___8___2___4___2648___31	116	412.277	8	uncA	37584	0	8	W054	aspA,glnA,gltA,glyA,pgm,tkt,porA,fn_gyrA	99.9688	92.81	1	NO_INHOUSE
W078	45-80-217	0.08903	45	4	7	10	4	1	7	1	80	217	0.998866	57334.fasta	W078___4___7___10___4___1___7___1___217___80	28	435.504	9		79612	0	9	W078	aspA,glnA,gltA,glyA,pgm,tkt,uncA,porA,fn_gyrA	100	100	2	NO_INHOUSE
W079	801-36-127	0.256197	801	64	70	68	97	122	106	16	36	127	0.999873	6083.fasta	W079___64___70___68___97___122___106___16___127___36	849	462.476	9		250667	0	9	W079	aspA,glnA,gltA,glyA,pgm,tkt,uncA,porA,fn_gyrA	100	100	1	NO_INHOUSE
W079	607-9-940	0.095339	607	8	2	5	53	11	3	1	9	940	0.991182	31157.fasta	W079___8___2___5___53___11___3___1___940___9	716	525.918	2	glnA,glyA,pgm,tkt,uncA,porA,fn_gyrA	8563	0	2	W079	aspA,gltA	100	80.19	3	NO_INHOUSE
W079	19-8-582	0.030414	19	2	1	5	3	2	1	5	8	582	1	109829.fasta	W079___2___1___5___3___2___1___5___582___8	34	393.406	8	porA	103065	2	6	W079	aspA,glnA,gltA,glyA,pgm,tkt,uncA,fn_gyrA	100	98.6375	9	NO_INHOUSE
W081	177-31-4123	0.196197	177	17	2	8	5	8	2	4	31	4123	0.997722	100884.fasta	W081___17___2___8___5___8___2___4___4123___31	116	460.528	7	gltA,porA	248147	0	7	W081	aspA,glnA,glyA,pgm,tkt,uncA,fn_gyrA	100	100	1	NO_INHOUSE
W081	5128-31-728	0.040035	5128	35	2	9	432	8	46	21	31	728	0.995992	92360.fasta	W081___35___2___9___432___8___46___21___728___31	475	480.365	5	aspA,glyA,tkt,uncA	187034	3	2	W081	glnA,gltA,pgm,porA,fn_gyrA	100	100	8	NO_INHOUSE
W082	45-7-180	0.059927	45	4	7	10	4	1	7	1	7	180	0.994945	107526.fasta	W082___4___7___10___4___1___7___1___180___7	87	338.356	8	porA	44795	5	3	W082	aspA,glnA,gltA,glyA,pgm,tkt,uncA,fn_gyrA	100	100	7	NO_INHOUSE
W083	11044-10-11	0.035334	11044	4	7	10	5	2	7	1	10	11	0.990742	94139.fasta	W083___4___7___10___5___2___7___1___11___10	997	227.438	4	gltA,pgm,tkt,porA,fn_gyrA	13672	0	4	W083	aspA,glnA,glyA,uncA	100	88.155	9	NO_INHOUSE
W083	144-31-204	0.029898	144	17	2	8	5	8	2	21	31	204	0.99278	107176.fasta	W083___17___2___8___5___8___2___21___204___31	400	300.206	7	uncA,porA	28294	2	5	W083	aspA,glnA,gltA,glyA,pgm,tkt,fn_gyrA	99.9671	99.5014	10	NO_INHOUSE
W083	1231-31-270	0.024189	1231	27	2	22	104	43	86	31	31	270	0.994564	42085.fasta	W083___27___2___22___104___43___86___31___270___31	474	300.682	7	aspA,uncA	21781	3	4	W083	glnA,gltA,glyA,pgm,tkt,porA,fn_gyrA	100	88.2143	14	NO_INHOUSE
W083	6591-11-1634	0.015982	6591	64	105	20	77	94	103	16	11	1634	0.992355	69254.fasta	W083___64___105___20___77___94___103___16___1634___11	873	265.934	7	glnA,gltA	15404	4	3	W083	aspA,glyA,pgm,tkt,uncA,porA,fn_gyrA	100	90.9486	20	NO_INHOUSE
W084	1231-31-270	0.221966	1231	27	2	22	104	43	86	31	31	270	0.999109	42085.fasta	W084___27___2___22___104___43___86___31___270___31	474	484.422	7	aspA,fn_gyrA	237312	0	7	W084	glnA,gltA,glyA,pgm,tkt,uncA,porA	100	100	1	NO_INHOUSE
W084	607-9-940	0.063882	607	8	2	5	53	11	3	1	9	940	0.99423	31157.fasta	W084___8___2___5___53___11___3___1___940___9	716	288.476	3	aspA,glyA,pgm,tkt,porA,fn_gyrA	37947	1	2	W084	glnA,gltA,uncA	100	99.9167	3	NO_INHOUSE
W084	11044-10-11	0.035222	11044	4	7	10	5	2	7	1	10	11	0.996436	94139.fasta	W084___4___7___10___5___2___7___1___11___10	997	269.92	5	glnA,glyA,porA,fn_gyrA	13504	1	4	W084	aspA,gltA,pgm,tkt,uncA	100	96.16	10	NO_INHOUSE
W084	4069-40-363	0.021712	4069	18	2	22	104	1	86	31	40	363	0.996394	108911.fasta	W084___18___2___22___104___1___86___31___363___40	420	391.465	7	aspA,porA	199224	5	2	W084	glnA,gltA,glyA,pgm,tkt,uncA,fn_gyrA	100	94.2629	15	NO_INHOUSE
W084	299-3-4574	0.010278	299	1	4	5	2	2	1	5	3	4574	0.992915	110948.fasta	W084___1___4___5___2___2___1___5___4574___3	636	244.182	4	aspA,glnA,glyA,porA,fn_gyrA	8695	2	2	W084	gltA,pgm,tkt,uncA	100	94.095	23	NO_INHOUSE
W087	267-1-73	0.635341	267	4	7	40	4	42	51	1	1	73	1	79262.fasta	W087___4___7___40___4___42___51___1___73___1	52	488.201	9		1387262	0	9	W087	aspA,glnA,gltA,glyA,pgm,tkt,uncA,porA,fn_gyrA	100	100	1	NO_INHOUSE
W087	8510-11-1795	0.08649	8510	64	22	22	100	134	160	16	11	1795	0.999364	48446.fasta	W087___64___22___22___100___134___160___16___1795___11	359	453.419	8	gltA	148719	1	7	W087	aspA,glnA,glyA,pgm,tkt,uncA,porA,fn_gyrA	100	92.6637	2	NO_INHOUSE
W087	7811-11-2366	0.023654	7811	64	133	203	142	134	160	60	11	2366	0.999322	33939.fasta	W087___64___133___203___142___134___160___60___2366___11	727	367.564	7	glnA,glyA	53405	4	3	W087	aspA,gltA,pgm,tkt,uncA,porA,fn_gyrA	100	87.7486	4	NO_INHOUSE
W087	10035-36-1612	0.017513	10035	18	89	77	98	138	17	16	36	1612	0.997202	80565.fasta	W087___18___89___77___98___138___17___16___1612___36	923	268.129	5	aspA,gltA,tkt,porA	28675	1	4	W087	glnA,glyA,pgm,uncA,fn_gyrA	100	86.786	6	NO_INHOUSE
W087	6591-11-1634	0.015922	6591	64	105	20	77	94	103	16	11	1634	0.997795	69254.fasta	W087___64___105___20___77___94___103___16___1634___11	873	429.327	5	glnA,glyA,tkt,porA	80114	3	2	W087	aspA,gltA,pgm,uncA,fn_gyrA	100	100	7	NO_INHOUSE
B015	45-7-467	0.930744	45	4	7	10	4	1	7	1	7	467	0.99916	B015-230519-01.fasta	B015___4___7___10___4___1___7___1___467___7	222	490.637	9		11621274	0	9	B015	aspA,glnA,gltA,glyA,pgm,tkt,uncA,porA,fn_gyrA	100	100	1	WITH_INHOUSE
B021	48-3-7	0.537906	48	2	4	1	2	7	1	5	3	7	0.999539	B021-070519-01.fasta	B021___2___4___1___2___7___1___5___7___3	3	490.924	9		1989308	0	9	21-B021	aspA,glnA,gltA,glyA,pgm,tkt,uncA,porA,fn_gyrA	100	100	1	WITH_INHOUSE
B023	448-102-2353	0.9435	448	61	70	22	18	2	74	47	102	2353	0.997484	B023-070519-01.fasta	B023___61___70___22___18___2___74___47___2353___102	486	496.054	9		3317275	0	9	21-B023	aspA,glnA,gltA,glyA,pgm,tkt,uncA,porA,fn_gyrA	100	100	1	WITH_INHOUSE
B025	11224-7-49	0.945895	11224	4	7	667	4	1	7	1	7	49	0.999666	85135.fasta	B025___4___7___667___4___1___7___1___49___7	111	504.898	8	gltA	647314	0	8	B25	aspA,glnA,glyA,pgm,tkt,uncA,porA,fn_gyrA	100	100	1	WITH_INHOUSE
B026	448-102-2353	0.933633	448	61	70	22	18	2	74	47	102	2353	0.997571	B023-070519-01.fasta	B026___61___70___22___18___2___74___47___2353___102	486	496.064	9		3082855	0	9	21-B026	aspA,glnA,gltA,glyA,pgm,tkt,uncA,porA,fn_gyrA	100	100	1	WITH_INHOUSE
B027	677-19-276	0.839247	677	10	81	50	99	120	76	52	19	276	0.999958	B046-180619-01.fasta	B027___10___81___50___99___120___76___52___276___19	101	491.975	9		4842611	0	9	21-B027	aspA,glnA,gltA,glyA,pgm,tkt,uncA,porA,fn_gyrA	100	100	1	WITH_INHOUSE
B027	951-31-2358	0.151586	951	18	100	82	24	138	116	63	31	2358	0.999958	B096-300719-02.fasta	B027___18___100___82___24___138___116___63___2358___31	975	484.21	8	aspA	642920	0	8	21-B027	glnA,gltA,glyA,pgm,tkt,uncA,porA,fn_gyrA	100	100	2	WITH_INHOUSE
B028	951-31-2358	0.720224	951	18	100	82	24	138	116	63	31	2358	1	B096-300719-02.fasta	B028___18___100___82___24___138___116___63___2358___31	975	494.346	9		6521825	0	9	B028	aspA,glnA,gltA,glyA,pgm,tkt,uncA,porA,fn_gyrA	100	100	1	WITH_INHOUSE
B028	2491-11-1634	0.169131	2491	64	22	212	100	134	233	16	11	1634	0.996176	B028-230519-01.fasta	B028___64___22___212___100___134___233___16___1634___11	439	483.84	8	aspA	1299225	0	8	B028	glnA,gltA,glyA,pgm,tkt,uncA,porA,fn_gyrA	100	98.585	2	WITH_INHOUSE
B029	448-31-860	0.986271	448	61	70	22	18	2	74	47	31	860	0.999916	B029-110619-02.fasta	B029___61___70___22___18___2___74___47___860___31	379	491.909	9		3824715	0	9	21-B029	aspA,glnA,gltA,glyA,pgm,tkt,uncA,porA,fn_gyrA	100	100	1	WITH_INHOUSE
B035	7831-380-4439	0.414136	7831	64	22	85	98	652	270	60	380	4439	0.999833	33960.fasta	B035___64___22___85___98___652___270___60___4439___380	708	490.447	9		947400	0	9	21-B035	aspA,glnA,gltA,glyA,pgm,tkt,uncA,porA,fn_gyrA	100	100	1	WITH_INHOUSE
B035	6427-11-1157	0.117024	6427	64	95	20	100	514	101	60	11	1157	0.999958	78916.fasta	B035___64___95___20___100___514___101___60___1157___11	867	472.602	9		550647	2	7	21-B035	aspA,glnA,gltA,glyA,pgm,tkt,uncA,porA,fn_gyrA	100	97.0667	2	WITH_INHOUSE
B035	7813-11-2532	0.060304	7813	64	89	20	98	134	593	16	11	2532	0.99762	33945.fasta	B035___64___89___20___98___134___593___16___2532___11	704	470.972	6	glnA,tkt,porA	713975	4	2	21-B035	aspA,gltA,glyA,pgm,uncA,fn_gyrA	100	100	3	WITH_INHOUSE
B035	11002-99-2347	0.016459	11002	258	174	207	193	336	314	131	99	2347	0.995448	B040F-110619-01.fasta	B035___258___174___207___193___336___314___131___2347___99	515	286.75	5	glnA,tkt,porA,fn_gyrA	14057	0	5	21-B035	aspA,gltA,glyA,pgm,uncA	100	90.232	12	WITH_INHOUSE
B035	7825-298-4437	0.011827	7825	258	174	474	193	753	595	131	298	4437	0.996033	33954.fasta	B035___258___174___474___193___753___595___131___4437___298	706	422.481	5	glnA,gltA,pgm,tkt	21056	3	2	21-B035	aspA,glyA,uncA,porA,fn_gyrA	100	99.07	17	WITH_INHOUSE
B036	10813-11-2351	0.359466	10813	64	22	148	100	94	187	16	11	2351	1	B050-180619-01.fasta	B036___64___22___148___100___94___187___16___2351___11	972	488.792	9		2454784	0	9	B036	aspA,glnA,gltA,glyA,pgm,tkt,uncA,porA,fn_gyrA	100	100	1	WITH_INHOUSE
B036	1540-40-860	0.222153	1540	76	33	22	104	43	109	31	40	860	0.998492	B036-110619-01.fasta	B036___76___33___22___104___43___109___31___860___40	473	486.922	9		1948995	0	9	B036	aspA,glnA,gltA,glyA,pgm,tkt,uncA,porA,fn_gyrA	100	100	2	WITH_INHOUSE
B036	7836-99-2347	0.069232	7836	258	174	207	193	336	314	229	99	2347	0.999581	B113-130819-02.fasta	B036___258___174___207___193___336___314___229___2347___99	515	455.086	9		295978	0	9	B036	aspA,glnA,gltA,glyA,pgm,tkt,uncA,porA,fn_gyrA	100	99.5089	3	WITH_INHOUSE
B036	11379-11-2367	0.054684	11379	64	226	203	189	652	54	16	11	2367	0.998869	B338-070621-02.fasta	B036___64___226___203___189___652___54___16___2367___11	992	398.311	7	pgm,porA	1223429	3	4	B036	aspA,glnA,gltA,glyA,tkt,uncA,fn_gyrA	100	93.83	6	WITH_INHOUSE
B036	2753-11-579	0.010719	2753	64	22	85	98	134	54	16	11	579	0.997863	43659.fasta	B036___64___22___85___98___134___54___16___579___11	749	464.541	8	glyA	1688441	6	2	B036	aspA,glnA,gltA,pgm,tkt,uncA,porA,fn_gyrA	100	100	10	WITH_INHOUSE
B037	6427-11-1157	0.211653	6427	64	95	20	100	514	101	60	11	1157	0.99933	78916.fasta	B037___64___95___20___100___514___101___60___1157___11	867	472.456	9		640141	0	9	B037	aspA,glnA,gltA,glyA,pgm,tkt,uncA,porA,fn_gyrA	100	99.8067	1	WITH_INHOUSE
B037	45-7-49	0.065498	45	4	7	10	4	1	7	1	7	49	0.998953	B037-110619-01.fasta	B037___4___7___10___4___1___7___1___49___7	63	463.595	9		393257	0	9	B037	aspA,glnA,gltA,glyA,pgm,tkt,uncA,porA,fn_gyrA	100	97.9389	2	WITH_INHOUSE
B037	8335-11-2526	0.046248	8335	64	22	100	100	817	94	16	11	2526	0.996482	32760.fasta	B037___64___22___100___100___817___94___16___2526___11	696	454.358	6	gltA,pgm,porA	768540	3	3	B037	aspA,glnA,glyA,tkt,uncA,fn_gyrA	100	98.7417	3	WITH_INHOUSE
B037	7831-380-4439	0.036948	7831	64	22	85	98	652	270	60	380	4439	0.995603	33960.fasta	B037___64___22___85___98___652___270___60___4439___380	708	442.29	6	gltA,porA,fn_gyrA	605488	3	3	B037	aspA,glnA,glyA,pgm,tkt,uncA	100	93.84	5	WITH_INHOUSE
B037	7805-11-2367	0.036757	7805	64	22	85	98	134	101	16	11	2367	0.997739	33933.fasta	B037___64___22___85___98___134___101___16___2367___11	701	490.899	8	gltA	1025884	6	2	B037	aspA,glnA,glyA,pgm,tkt,uncA,porA,fn_gyrA	100	98.8388	6	WITH_INHOUSE
B037	6390-11-3122	0.03601	6390	64	133	20	100	134	160	16	11	3122	0.996901	78910.fasta	B037___64___133___20___100___134___160___16___3122___11	865	426.07	8	porA	1000871	6	2	B037	aspA,glnA,gltA,glyA,pgm,tkt,uncA,fn_gyrA	100	95.3875	7	WITH_INHOUSE
B037	7851-152-2535	0.023306	7851	64	22	71	100	134	187	60	152	2535	0.995938	34080.fasta	B037___64___22___71___100___134___187___60___2535___152	717	392.703	7	tkt,porA	372972	5	2	B037	aspA,glnA,gltA,glyA,pgm,uncA,fn_gyrA	99.9657	96.4157	17	WITH_INHOUSE
B037	11379-11-2367	0.015568	11379	64	226	203	189	652	54	16	11	2367	0.999832	B338-070621-02.fasta	B037___64___226___203___189___652___54___16___2367___11	992	448.793	9		994498	7	2	B037	aspA,glnA,gltA,glyA,pgm,tkt,uncA,porA,fn_gyrA	100	100	22	WITH_INHOUSE
B038	10811-36-1279	0.751254	10811	64	33	20	181	94	17	16	36	1279	0.999916	B038-110619-02.fasta	B038___64___33___20___181___94___17___16___1279___36	969	491.626	9		2689473	0	9	21-B038	aspA,glnA,gltA,glyA,pgm,tkt,uncA,porA,fn_gyrA	100	100	1	WITH_INHOUSE
B038	10815-11-479	0.175225	10815	18	81	68	143	134	153	16	11	479	0.999539	B051-180619-02.fasta	B038___18___81___68___143___134___153___16___479___11	973	477.192	8	aspA	650662	1	7	21-B038	glnA,gltA,glyA,pgm,tkt,uncA,porA,fn_gyrA	100	98.2288	2	WITH_INHOUSE
B038	3536-104-391	0.019858	3536	64	22	20	100	134	160	16	104	391	0.999623	B054-180619-01.fasta	B038___64___22___20___100___134___160___16___391___104	514	405.379	9		1018605	4	5	21-B038	aspA,glnA,gltA,glyA,pgm,tkt,uncA,porA,fn_gyrA	100	97.2644	4	WITH_INHOUSE
B039	10820-11-1224	0.76926	10820	64	89	319	100	134	103	16	11	1224	0.999496	B039-110619-03.fasta	B039___64___89___319___100___134___103___16___1224___11	320	491.657	9		5175304	0	9	21-B039	aspA,glnA,gltA,glyA,pgm,tkt,uncA,porA,fn_gyrA	100	100	1	WITH_INHOUSE
B039	2491-11-1157	0.029092	2491	64	22	212	100	134	233	16	11	1157	0.996178	22260.fasta	B039___64___22___212___100___134___233___16___1157___11	439	439.709	7	tkt,porA	2844560	5	2	21-B039	aspA,glnA,gltA,glyA,pgm,uncA,fn_gyrA	100	98.07	2	WITH_INHOUSE
B039	7805-11-2367	0.021878	7805	64	22	85	98	134	101	16	11	2367	0.99517	33933.fasta	B039___64___22___85___98___134___101___16___2367___11	701	363.572	7	gltA,porA	2258104	5	2	21-B039	aspA,glnA,glyA,pgm,tkt,uncA,fn_gyrA	100	89.8786	3	WITH_INHOUSE
B039	11002-99-2347	0.014901	11002	258	174	207	193	336	314	131	99	2347	0.994078	B040F-110619-01.fasta	B039___258___174___207___193___336___314___131___2347___99	515	478.615	5	gltA,pgm,tkt,fn_gyrA	127372	0	5	21-B039	aspA,glnA,glyA,uncA,porA	100	99.462	5	WITH_INHOUSE
B039	11119-11-4549	0.010916	11119	64	22	203	351	514	229	16	11	4549	0.99517	110223.fasta	B039___64___22___203___351___514___229___16___4549___11	598	348.386	6	glyA,pgm,porA	1727734	4	2	21-B039	aspA,glnA,gltA,tkt,uncA,fn_gyrA	100	91.115	8	WITH_INHOUSE
B045	464-3-2348	0.597601	464	24	2	2	2	10	3	1	3	2348	0.99589	B045-180619-01.fasta	B045___24___2___2___2___10___3___1___2348___3	57	491.126	9		4019471	0	9	B045	aspA,glnA,gltA,glyA,pgm,tkt,uncA,porA,fn_gyrA	100	100	1	WITH_INHOUSE
B047	19-8-327	0.507207	19	2	1	5	3	2	1	5	8	327	0.995597	B108-130819-01.fasta	B047___2___1___5___3___2___1___5___327___8	138	490.611	9		6990574	0	9	B047	aspA,glnA,gltA,glyA,pgm,tkt,uncA,porA,fn_gyrA	100	100	1	WITH_INHOUSE
B050	10813-11-2351	0.774109	10813	64	22	148	100	94	187	16	11	2351	1	B050-180619-01.fasta	B050___64___22___148___100___94___187___16___2351___11	972	490.223	9		5832857	0	9	B050	aspA,glnA,gltA,glyA,pgm,tkt,uncA,porA,fn_gyrA	100	100	1	WITH_INHOUSE
B050	1080-74-130	0.138138	1080	10	2	107	137	120	76	1	74	130	0.997563	B300-140421-01.fasta	B050___10___2___107___137___120___76___1___130___74	303	473.991	9		894039	0	9	B050	aspA,glnA,gltA,glyA,pgm,tkt,uncA,porA,fn_gyrA	100	100	2	WITH_INHOUSE
B050	7836-99-2347	0.039874	7836	258	174	207	193	336	314	229	99	2347	0.995336	B113-130819-02.fasta	B050___258___174___207___193___336___314___229___2347___99	515	445.257	9		319416	0	9	B050	aspA,glnA,gltA,glyA,pgm,tkt,uncA,porA,fn_gyrA	100	100	3	WITH_INHOUSE
B051	10815-11-479	0.471458	10815	18	81	68	143	134	153	16	11	479	1	B051-180619-02.fasta	B051___18___81___68___143___134___153___16___479___11	973	490.726	9		771349	0	9	21-B051	aspA,glnA,gltA,glyA,pgm,tkt,uncA,porA,fn_gyrA	100	100	1	WITH_INHOUSE
B051	6591-11-1634	0.292628	6591	64	105	20	77	94	103	16	11	1634	0.999749	B121-270819-02.fasta	B051___64___105___20___77___94___103___16___1634___11	435	490.219	9		466481	2	7	21-B051	aspA,glnA,gltA,glyA,pgm,tkt,uncA,porA,fn_gyrA	100	99.3356	2	WITH_INHOUSE
B052	11379-11-2367	0.423486	11379	64	226	203	189	652	54	16	11	2367	0.999874	B338-070621-02.fasta	B052___64___226___203___189___652___54___16___2367___11	992	490.234	9		2200803	0	9	21-B052	aspA,glnA,gltA,glyA,pgm,tkt,uncA,porA,fn_gyrA	100	100	1	WITH_INHOUSE
B052	7815-11-2352	0.303746	7815	64	105	203	100	134	94	16	11	2352	0.999916	B052-180619-01.fasta	B052___64___105___203___100___134___94___16___2352___11	974	492.663	9		2208875	4	5	21-B052	aspA,glnA,gltA,glyA,pgm,tkt,uncA,porA,fn_gyrA	100	99.6044	2	WITH_INHOUSE
B052	6427-11-1157	0.073508	6427	64	95	20	100	514	101	60	11	1157	0.999496	78916.fasta	B052___64___95___20___100___514___101___60___1157___11	867	454.316	9		1038261	3	6	21-B052	aspA,glnA,gltA,glyA,pgm,tkt,uncA,porA,fn_gyrA	100	97.3967	3	WITH_INHOUSE
B052	7805-11-2367	0.016303	7805	64	22	85	98	134	101	16	11	2367	0.998322	33933.fasta	B052___64___22___85___98___134___101___16___2367___11	701	463.086	8	gltA	1900600	6	2	21-B052	aspA,glnA,glyA,pgm,tkt,uncA,porA,fn_gyrA	100	96.3512	4	WITH_INHOUSE
B052	10818-104-391	0.010227	10818	64	22	20	100	134	301	16	104	391	0.999538	B038-110619-01.fasta	B052___64___22___20___100___134___301___16___391___104	514	424.243	9		1490281	6	3	21-B052	aspA,glnA,gltA,glyA,pgm,tkt,uncA,porA,fn_gyrA	100	98.2789	12	WITH_INHOUSE
B054	7882-36-2357	0.891668	7882	64	583	22	111	122	303	16	36	2357	1	B112-130819-01.fasta	B054___64___583___22___111___122___303___16___2357___36	976	493.643	9		5892726	0	9	B054	aspA,glnA,gltA,glyA,pgm,tkt,uncA,porA,fn_gyrA	100	100	1	WITH_INHOUSE
B054	801-36-127	0.076217	801	64	70	68	97	122	106	16	36	127	1	B113-130819-01.fasta	B054___64___70___68___97___122___106___16___127___36	977	473.857	9		2851339	4	5	B054	aspA,glnA,gltA,glyA,pgm,tkt,uncA,porA,fn_gyrA	100	100	2	WITH_INHOUSE
B054	3536-104-391	0.02212	3536	64	22	20	100	134	160	16	104	391	0.999371	B054-180619-01.fasta	B054___64___22___20___100___134___160___16___391___104	514	407.655	9		1506057	2	7	B054	aspA,glnA,gltA,glyA,pgm,tkt,uncA,porA,fn_gyrA	100	99.5533	3	WITH_INHOUSE
B063	583-1-44	0.296705	583	4	7	10	4	42	51	1	1	44	0.999874	IN_Cj_FI_143_innuendo.fasta	B063___4___7___10___4___42___51___1___44___1	44	488.284	9		3654386	0	9	21-B063	aspA,glnA,gltA,glyA,pgm,tkt,uncA,porA,fn_gyrA	100	100	1	WITH_INHOUSE
B063	4529-7-44	0.17443	4529	4	7	10	4	1	7	300	7	44	0.999413	61375.fasta	B063___4___7___10___4___1___7___300___44___7	28	532.441	9		3859892	6	3	21-B063	aspA,glnA,gltA,glyA,pgm,tkt,uncA,porA,fn_gyrA	99.9556	94.4789	2	WITH_INHOUSE
B063	177-31-236	0.123842	177	17	2	8	5	8	2	4	31	236	0.997526	B103-300719-02.fasta	B063___17___2___8___5___8___2___4___236___31	117	435.391	9		981599	0	9	21-B063	aspA,glnA,gltA,glyA,pgm,tkt,uncA,porA,fn_gyrA	100	96.39	3	WITH_INHOUSE
B063	22-1-70	0.055333	22	1	3	6	4	3	3	3	1	70	0.999203	14651.fasta	B063___1___3___6___4___3___3___3___70___1	23	326.29	9		897586	2	7	21-B063	aspA,glnA,gltA,glyA,pgm,tkt,uncA,porA,fn_gyrA	100	94.8633	6	WITH_INHOUSE
B067	1080-74-130	0.607032	1080	10	2	107	137	120	76	1	74	130	0.99727	B300-140421-01.fasta	B067___10___2___107___137___120___76___1___130___74	303	491.499	9		5382798	0	9	21-B067	aspA,glnA,gltA,glyA,pgm,tkt,uncA,porA,fn_gyrA	100	100	1	WITH_INHOUSE
B067	383-1-73	0.221487	383	4	7	12	4	42	51	1	1	73	0.999958	B067-020719-01.fasta	B067___4___7___12___4___42___51___1___73___1	44	470.969	9		1632758	1	8	21-B067	aspA,glnA,gltA,glyA,pgm,tkt,uncA,porA,fn_gyrA	100	99.6511	2	WITH_INHOUSE
B067	9592-80-3341	0.013204	9592	17	2	9	5	8	2	21	80	3341	0.990215	84804.fasta	B067___17___2___9___5___8___2___21___3341___80	912	550.463	7	gltA,uncA	586633	2	5	21-B067	aspA,glnA,glyA,pgm,tkt,porA,fn_gyrA	99.93	83.2329	4	WITH_INHOUSE
B068	383-1-73	0.869312	383	4	7	12	4	42	51	1	1	73	0.999874	B067-020719-01.fasta	B068___4___7___12___4___42___51___1___73___1	44	489.246	9		4780879	0	9	21-B068	aspA,glnA,gltA,glyA,pgm,tkt,uncA,porA,fn_gyrA	100	100	1	WITH_INHOUSE
B068	4529-7-44	0.048335	4529	4	7	10	4	1	7	300	7	44	0.998951	61375.fasta	B068___4___7___10___4___1___7___300___44___7	28	390.037	9		1778150	6	3	21-B068	aspA,glnA,gltA,glyA,pgm,tkt,uncA,porA,fn_gyrA	99.9611	91.1767	2	WITH_INHOUSE
B071	45-7-44	0.499074	45	4	7	10	4	1	7	1	7	44	0.996561	B072-020719-02.fasta	B071___4___7___10___4___1___7___1___44___7	28	492.27	9		3624385	0	9	21-B071	aspA,glnA,gltA,glyA,pgm,tkt,uncA,porA,fn_gyrA	100	100	1	WITH_INHOUSE
B076	383-1-73	0.947839	383	4	7	12	4	42	51	1	1	73	0.999622	B067-020719-01.fasta	B076___4___7___12___4___42___51___1___73___1	44	489.292	9		4999472	0	9	21-B076	aspA,glnA,gltA,glyA,pgm,tkt,uncA,porA,fn_gyrA	100	100	1	WITH_INHOUSE
B077	383-1-73	0.95167	383	4	7	12	4	42	51	1	1	73	0.999664	B067-020719-01.fasta	B077___4___7___12___4___42___51___1___73___1	44	489.358	9		5658226	0	9	21-B077	aspA,glnA,gltA,glyA,pgm,tkt,uncA,porA,fn_gyrA	100	100	1	WITH_INHOUSE
B078	383-1-73	0.939791	383	4	7	12	4	42	51	1	1	73	0.999832	B067-020719-01.fasta	B078___4___7___12___4___42___51___1___73___1	44	489.22	9		3360253	0	9	21-B078	aspA,glnA,gltA,glyA,pgm,tkt,uncA,porA,fn_gyrA	100	100	1	WITH_INHOUSE
B080	383-1-73	0.946823	383	4	7	12	4	42	51	1	1	73	0.999707	B067-020719-01.fasta	B080___4___7___12___4___42___51___1___73___1	44	489.236	9		3207222	0	9	21-B080	aspA,glnA,gltA,glyA,pgm,tkt,uncA,porA,fn_gyrA	100	100	1	WITH_INHOUSE
B082	383-1-73	0.948695	383	4	7	12	4	42	51	1	1	73	0.999622	B067-020719-01.fasta	B082___4___7___12___4___42___51___1___73___1	44	489.381	9		1798330	0	9	21-B082	aspA,glnA,gltA,glyA,pgm,tkt,uncA,porA,fn_gyrA	100	100	1	WITH_INHOUSE
B083	383-1-73	0.96285	383	4	7	12	4	42	51	1	1	73	0.999664	B067-020719-01.fasta	B083___4___7___12___4___42___51___1___73___1	44	489.379	9		4291952	0	9	21-B083	aspA,glnA,gltA,glyA,pgm,tkt,uncA,porA,fn_gyrA	100	100	1	WITH_INHOUSE
B086	383-1-73	0.962719	383	4	7	12	4	42	51	1	1	73	0.99979	B067-020719-01.fasta	B086___4___7___12___4___42___51___1___73___1	44	489.285	9		1914340	0	9	21-B086	aspA,glnA,gltA,glyA,pgm,tkt,uncA,porA,fn_gyrA	100	100	1	WITH_INHOUSE
B096	951-31-2358	1	951	18	100	82	24	138	116	63	31	2358	1	B096-300719-02.fasta	B096___18___100___82___24___138___116___63___2358___31	975	496.241	9		2110629	0	9	21-B096	aspA,glnA,gltA,glyA,pgm,tkt,uncA,porA,fn_gyrA	100	100	1	WITH_INHOUSE
B100	383-1-73	0.960604	383	4	7	12	4	42	51	1	1	73	0.999669	B067-020719-01.fasta	B100___4___7___12___4___42___51___1___73___1	44	489.42	9		569431	0	9	B100	aspA,glnA,gltA,glyA,pgm,tkt,uncA,porA,fn_gyrA	100	100	1	WITH_INHOUSE
B103	383-1-73	0.928694	383	4	7	12	4	42	51	1	1	73	0.999916	B067-020719-01.fasta	B103___4___7___12___4___42___51___1___73___1	44	489.268	9		3072627	0	9	21-B103	aspA,glnA,gltA,glyA,pgm,tkt,uncA,porA,fn_gyrA	100	100	1	WITH_INHOUSE
B103	177-31-4123	0.016609	177	17	2	8	5	8	2	4	31	4123	0.995346	100884.fasta	B103___17___2___8___5___8___2___4___4123___31	225	355.286	7	glnA,porA	46074	0	7	21-B103	aspA,gltA,glyA,pgm,tkt,uncA,fn_gyrA	100	96.0629	2	WITH_INHOUSE
B103	11384-31-236	0.01575	11384	17	2	670	5	8	2	4	31	236	0.996772	B063-020719-01.fasta	B103___17___2___670___5___8___2___4___236___31	117	407.096	8	glnA	80410	6	2	21-B103	aspA,gltA,glyA,pgm,tkt,uncA,porA,fn_gyrA	100	95.0312	3	WITH_INHOUSE
B112	7882-36-2357	1	7882	64	583	22	111	122	303	16	36	2357	1	B112-130819-01.fasta	B112___64___583___22___111___122___303___16___2357___36	976	495.14	9		3159542	0	9	21-B112	aspA,glnA,gltA,glyA,pgm,tkt,uncA,porA,fn_gyrA	100	100	1	WITH_INHOUSE
B114	10810-101-2355	0.897517	10810	94	117	90	125	1094	147	100	101	2355	1	B114-130819-01.fasta	B114___94___117___90___125___1094___147___100___2355___101	978	495.795	9		2488218	0	9	21-B114	aspA,glnA,gltA,glyA,pgm,tkt,uncA,porA,fn_gyrA	100	100	1	WITH_INHOUSE
B114	1277-105-2359	0.102483	1277	96	135	99	136	183	140	113	105	2359	0.999958	B114-130819-03.fasta	B114___96___135___99___136___183___140___113___2359___105	979	430.919	9		127038	0	9	21-B114	aspA,glnA,gltA,glyA,pgm,tkt,uncA,porA,fn_gyrA	100	95.7978	2	WITH_INHOUSE
B119	11004-106-1772	1	11004	15	33	72	875	753	103	16	106	1772	1	B119-270819-01.fasta	B119___15___33___72___875___753___103___16___1772___106	980	496.154	9		4394439	0	9	21-B119	aspA,glnA,gltA,glyA,pgm,tkt,uncA,porA,fn_gyrA	100	100	1	WITH_INHOUSE
B121	6591-11-1634	0.599598	6591	64	105	20	77	94	103	16	11	1634	0.991036	B121-270819-02.fasta	B121___64___105___20___77___94___103___16___1634___11	435	495.302	9		2208442	0	9	21-B121	aspA,glnA,gltA,glyA,pgm,tkt,uncA,porA,fn_gyrA	100	100	1	WITH_INHOUSE
B122	19-8-327	0.509976	19	2	1	5	3	2	1	5	8	327	0.997975	B108-130819-01.fasta	B122___2___1___5___3___2___1___5___327___8	138	492.107	9		298155	0	9	21-B122	aspA,glnA,gltA,glyA,pgm,tkt,uncA,porA,fn_gyrA	100	100	1	WITH_INHOUSE
B123	19-8-327	0.530977	19	2	1	5	3	2	1	5	8	327	0.995798	B108-130819-01.fasta	B123___2___1___5___3___2___1___5___327___8	138	492.207	9		578911	0	9	B123	aspA,glnA,gltA,glyA,pgm,tkt,uncA,porA,fn_gyrA	100	100	1	WITH_INHOUSE
B155	692-4-819	0.319668	692	37	52	57	26	127	29	23	4	819	0.997185	107681.fasta	B155___37___52___57___26___127___29___23___819___4	180	491.651	9		3537642	0	9	21-B155	aspA,glnA,gltA,glyA,pgm,tkt,uncA,porA,fn_gyrA	100	100	1	WITH_INHOUSE
B155	692-28-884	0.114877	692	37	52	57	26	127	29	23	28	884	0.993825	90014.fasta	B155___37___52___57___26___127___29___23___884___28	221	417.234	9		2665028	7	2	21-B155	aspA,glnA,gltA,glyA,pgm,tkt,uncA,porA,fn_gyrA	100	93.2567	4	WITH_INHOUSE
B158	5846-40-858	0.690312	5846	76	105	72	104	124	96	31	40	858	0.99566	B158-221019-01.fasta	B158___76___105___72___104___124___96___31___858___40	350	496.324	9		1737437	0	9	21-B158	aspA,glnA,gltA,glyA,pgm,tkt,uncA,porA,fn_gyrA	100	100	1	WITH_INHOUSE
B167	1044-27-25	0.9416	1044	2	10	2	4	19	3	6	27	25	0.999461	B167-230720-01.fasta	B167___2___10___2___4___19___3___6___25___27	47	492.041	9		346243	0	9	21-B167	aspA,glnA,gltA,glyA,pgm,tkt,uncA,porA,fn_gyrA	100	100	1	WITH_INHOUSE
B189	11-7-217	0.611868	11	48	7	10	4	1	7	1	7	217	0.993828	B183-300720-01.fasta	B189___48___7___10___4___1___7___1___217___7	319	488.214	9		10731339	0	9	B189	aspA,glnA,gltA,glyA,pgm,tkt,uncA,porA,fn_gyrA	100	100	1	WITH_INHOUSE
B190	1277-105-2359	0.469573	1277	96	135	99	136	183	140	113	105	2359	0.99958	B114-130819-03.fasta	B190___96___135___99___136___183___140___113___2359___105	979	493.055	9		2142462	0	9	21-B190	aspA,glnA,gltA,glyA,pgm,tkt,uncA,porA,fn_gyrA	100	100	1	WITH_INHOUSE
B190	11377-101-970	0.371994	11377	98	122	98	891	180	150	113	101	970	0.997313	B333-250521-01.fasta	B190___98___122___98___891___180___150___113___970___101	989	451.235	4	gltA,glyA,pgm,tkt,porA	752195	1	3	21-B190	aspA,glnA,uncA,fn_gyrA	100	97.2225	2	WITH_INHOUSE
B190	11-7-217	0.069731	11	48	7	10	4	1	7	1	7	217	0.997523	B183-300720-01.fasta	B190___48___7___10___4___1___7___1___217___7	319	454.891	9		363793	0	9	21-B190	aspA,glnA,gltA,glyA,pgm,tkt,uncA,porA,fn_gyrA	100	97.8089	3	WITH_INHOUSE
B193	5207-51-2356	0.995431	5207	37	187	4	28	19	24	23	51	2356	1	B193-200820-02.fasta	B193___37___187___4___28___19___24___23___2356___51	981	487.171	9		5037909	0	9	B193	aspA,glnA,gltA,glyA,pgm,tkt,uncA,porA,fn_gyrA	100	100	1	WITH_INHOUSE
B194	8614-36-6	0.996962	8614	2	1	4	28	58	672	58	36	6	0.999874	B189-130820-01.fasta	B194___2___1___4___28___58___672___58___6___36	181	492.184	9		4634237	0	9	21-B194	aspA,glnA,gltA,glyA,pgm,tkt,uncA,porA,fn_gyrA	100	100	1	WITH_INHOUSE
B198	8614-36-6	0.997374	8614	2	1	4	28	58	672	58	36	6	0.999916	B189-130820-01.fasta	B198___2___1___4___28___58___672___58___6___36	181	492.2	9		2522676	0	9	21-B198	aspA,glnA,gltA,glyA,pgm,tkt,uncA,porA,fn_gyrA	100	100	1	WITH_INHOUSE
B203	11385-80-203	0.787747	11385	4	43	9	5	8	46	21	80	203	0.99891	B203-270820-01.fasta	B203___4___43___9___5___8___46___21___203___80	174	496.177	9		4154178	0	9	21-B203	aspA,glnA,gltA,glyA,pgm,tkt,uncA,porA,fn_gyrA	100	100	1	WITH_INHOUSE
B203	677-19-276	0.014812	677	10	81	50	99	120	76	52	19	276	0.99979	B046-180619-01.fasta	B203___10___81___50___99___120___76___52___276___19	101	343.227	9		64309	0	9	21-B203	aspA,glnA,gltA,glyA,pgm,tkt,uncA,porA,fn_gyrA	100	92.12	6	WITH_INHOUSE
B221	2349-13-180	0.24445	2349	2	59	4	48	131	24	57	13	180	0.992858	48443.fasta	B221___2___59___4___48___131___24___57___180___13	759	485.175	7	gltA,porA	1656025	0	7	21-B221	aspA,glnA,glyA,pgm,tkt,uncA,fn_gyrA	100	100	1	WITH_INHOUSE
B221	1294-13-152	0.203417	1294	2	59	96	48	131	24	57	13	152	0.993866	B221-240920-01.fasta	B221___2___59___96___48___131___24___57___152___13	189	492.158	9		2224645	7	2	21-B221	aspA,glnA,gltA,glyA,pgm,tkt,uncA,porA,fn_gyrA	100	100	2	WITH_INHOUSE
B250	11376-108-2370	0.842733	11376	578	143	116	151	198	189	33	108	2370	1	B250-060321-01.fasta	B250___578___143___116___151___198___189___33___2370___108	983	494.735	9		88718	0	9	B250	aspA,glnA,gltA,glyA,pgm,tkt,uncA,porA,fn_gyrA	100	100	1	WITH_INHOUSE
B251	11376-108-2370	0.694998	11376	578	143	116	151	198	189	33	108	2370	0.998897	B250-060321-01.fasta	B251___578___143___116___151___198___189___33___2370___108	983	489.998	9		34282	0	9	B251	aspA,glnA,gltA,glyA,pgm,tkt,uncA,porA,fn_gyrA	100	100	1	WITH_INHOUSE
B266	6313-107-2369	0.937711	6313	323	439	384	483	611	512	371	107	2369	0.99979	B302-140421-01.fasta	B266___323___439___384___483___611___512___371___2369___107	986	495.924	9		213147	0	9	B266	aspA,glnA,gltA,glyA,pgm,tkt,uncA,porA,fn_gyrA	100	100	1	WITH_INHOUSE
B284	11413-110-2371	0.989095	11413	95	795	671	892	1137	872	717	110	2371	1	B284-140421-02.fasta	B284___95___795___671___892___1137___872___717___2371___110	984	491.709	9		4365791	0	9	B284	aspA,glnA,gltA,glyA,pgm,tkt,uncA,porA,fn_gyrA	100	100	1	WITH_INHOUSE
B285	1316-74-463	1	1316	95	2	94	127	181	144	110	74	463	1	B285-140421-02.fasta	B285___95___2___94___127___181___144___110___463___74	985	492.219	9		6216924	0	9	B285	aspA,glnA,gltA,glyA,pgm,tkt,uncA,porA,fn_gyrA	100	100	1	WITH_INHOUSE
B288	6313-107-2369	0.999091	6313	323	439	384	483	611	512	371	107	2369	0.99979	B302-140421-01.fasta	B288___323___439___384___483___611___512___371___2369___107	986	496.135	9		3597499	0	9	B288	aspA,glnA,gltA,glyA,pgm,tkt,uncA,porA,fn_gyrA	100	100	1	WITH_INHOUSE
B299	6313-107-2369	0.999967	6313	323	439	384	483	611	512	371	107	2369	0.999832	B302-140421-01.fasta	B299___323___439___384___483___611___512___371___2369___107	986	496.24	9		5459398	0	9	B299	aspA,glnA,gltA,glyA,pgm,tkt,uncA,porA,fn_gyrA	100	100	1	WITH_INHOUSE
B300	1080-74-130	0.807581	1080	10	2	107	137	120	76	1	74	130	0.994248	B300-140421-01.fasta	B300___10___2___107___137___120___76___1___130___74	303	491.961	9		4805983	0	9	B300	aspA,glnA,gltA,glyA,pgm,tkt,uncA,porA,fn_gyrA	100	100	1	WITH_INHOUSE
B302	6313-107-2369	1	6313	323	439	384	483	611	512	371	107	2369	0.999958	B302-140421-01.fasta	B302___323___439___384___483___611___512___371___2369___107	986	496.271	9		3787100	0	9	B302	aspA,glnA,gltA,glyA,pgm,tkt,uncA,porA,fn_gyrA	100	100	1	WITH_INHOUSE
B303	11376-108-2370	0.820055	11376	578	143	116	151	198	189	33	108	2370	1	B250-060321-01.fasta	B303___578___143___116___151___198___189___33___2370___108	983	498.736	8	glnA	26947	0	8	B303	aspA,gltA,glyA,pgm,tkt,uncA,porA,fn_gyrA	100	100	1	WITH_INHOUSE
B308	11376-108-2370	0.999869	11376	578	143	116	151	198	189	33	108	2370	1	B250-060321-01.fasta	B308___578___143___116___151___198___189___33___2370___108	983	496.133	9		1324437	0	9	B308	aspA,glnA,gltA,glyA,pgm,tkt,uncA,porA,fn_gyrA	100	100	1	WITH_INHOUSE
B318	45-7-49	0.391931	45	4	7	10	4	1	7	1	7	49	0.997106	B037-110619-01.fasta	B318___4___7___10___4___1___7___1___49___7	63	492.362	9		3942328	0	9	B318	aspA,glnA,gltA,glyA,pgm,tkt,uncA,porA,fn_gyrA	100	100	1	WITH_INHOUSE
B320	4570-37-1795	0.738214	4570	64	22	20	100	242	204	16	37	1795	0.995053	B320-050521-02.fasta	B320___64___22___20___100___242___204___16___1795___37	285	494.002	9		2271464	0	9	B320	aspA,glnA,gltA,glyA,pgm,tkt,uncA,porA,fn_gyrA	100	100	1	WITH_INHOUSE
B321	11383-11-1598	0.910212	11383	64	33	78	18	1136	86	16	11	1598	0.999919	B321-050521-01.fasta	B321___64___33___78___18___1136___86___16___1598___11	987	495.783	9		124503	0	9	B321	aspA,glnA,gltA,glyA,pgm,tkt,uncA,porA,fn_gyrA	100	100	1	WITH_INHOUSE
B325	563-31-909	0.426228	563	17	5	8	5	8	2	4	31	909	0.996267	B325-250521-01.fasta	B325___17___5___8___5___8___2___4___909___31	117	491.87	9		2409690	0	9	B325	aspA,glnA,gltA,glyA,pgm,tkt,uncA,porA,fn_gyrA	100	100	1	WITH_INHOUSE
B326	11383-11-1598	0.419355	11383	64	33	78	18	1136	86	16	11	1598	0.999916	B321-050521-01.fasta	B326___64___33___78___18___1136___86___16___1598___11	987	494.367	9		1443315	0	9	B326	aspA,glnA,gltA,glyA,pgm,tkt,uncA,porA,fn_gyrA	100	100	1	WITH_INHOUSE
B326	4570-37-1795	0.272435	4570	64	22	20	100	242	204	16	37	1795	0.997857	B320-050521-02.fasta	B326___64___22___20___100___242___204___16___1795___37	285	489.591	9		1073006	2	7	B326	aspA,glnA,gltA,glyA,pgm,tkt,uncA,porA,fn_gyrA	100	100	2	WITH_INHOUSE
B326	448-31-860	0.134743	448	61	70	22	18	2	74	47	31	860	0.999916	B029-110619-02.fasta	B326___61___70___22___18___2___74___47___860___31	379	452.828	9		317344	2	7	B326	aspA,glnA,gltA,glyA,pgm,tkt,uncA,porA,fn_gyrA	100	98.3278	3	WITH_INHOUSE
B327	11382-31-1468	0.747866	11382	80	70	164	98	123	229	16	31	1468	0.992107	B327-250521-01.fasta	B327___80___70___164___98___123___229___16___1468___31	205	496.491	9		3235964	0	9	B327	aspA,glnA,gltA,glyA,pgm,tkt,uncA,porA,fn_gyrA	100	100	1	WITH_INHOUSE
B328	6386-36-406	0.962445	6386	64	95	20	100	514	301	60	36	406	0.999916	B328-250521-02.fasta	B328___64___95___20___100___514___301___60___406___36	988	489.735	9		603959	0	9	B328	aspA,glnA,gltA,glyA,pgm,tkt,uncA,porA,fn_gyrA	100	100	1	WITH_INHOUSE
B329	677-19-276	0.948581	677	10	81	50	99	120	76	52	19	276	0.999958	B046-180619-01.fasta	B329___10___81___50___99___120___76___52___276___19	101	492.175	9		8307703	0	9	B329	aspA,glnA,gltA,glyA,pgm,tkt,uncA,porA,fn_gyrA	100	100	1	WITH_INHOUSE
B329	682-80-361	0.012974	682	26	2	9	51	8	46	21	80	361	0.993699	42532.fasta	B329___26___2___9___51___8___46___21___361___80	467	345.579	3	aspA,glyA,pgm,tkt,uncA,porA	61348	1	2	B329	glnA,gltA,fn_gyrA	100	95.46	2	WITH_INHOUSE
B330	677-19-276	0.99961	677	10	81	50	99	120	76	52	19	276	0.999916	B046-180619-01.fasta	B330___10___81___50___99___120___76___52___276___19	101	492.276	9		8877424	0	9	B330	aspA,glnA,gltA,glyA,pgm,tkt,uncA,porA,fn_gyrA	100	100	1	WITH_INHOUSE
B331	677-19-276	0.768275	677	10	81	50	99	120	76	52	19	276	0.999916	B046-180619-01.fasta	B331___10___81___50___99___120___76___52___276___19	101	491.782	9		4855265	0	9	B331	aspA,glnA,gltA,glyA,pgm,tkt,uncA,porA,fn_gyrA	100	100	1	WITH_INHOUSE
B331	230-47-217	0.087819	230	4	7	41	4	42	7	1	47	217	0.998657	56924.fasta	B331___4___7___41___4___42___7___1___217___47	44	489.733	6	gltA,pgm,fn_gyrA	457452	0	6	B331	aspA,glnA,glyA,tkt,uncA,porA	100	100	2	WITH_INHOUSE
B331	45-7-49	0.039203	45	4	7	10	4	1	7	1	7	49	0.997859	B037-110619-01.fasta	B331___4___7___10___4___1___7___1___49___7	63	477.171	9		740002	6	3	B331	aspA,glnA,gltA,glyA,pgm,tkt,uncA,porA,fn_gyrA	100	99.1922	3	WITH_INHOUSE
B333	11377-101-970	1	11377	98	122	98	891	180	150	113	101	970	1	B333-250521-01.fasta	B333___98___122___98___891___180___150___113___970___101	989	496.174	9		2363119	0	9	B333	aspA,glnA,gltA,glyA,pgm,tkt,uncA,porA,fn_gyrA	100	100	1	WITH_INHOUSE
B335	11584-11-2372	0.418129	11584	64	22	20	189	134	94	16	11	2372	1	B335-070621-01.fasta	B335___64___22___20___189___134___94___16___2372___11	990	488.867	9		899827	0	9	B335	aspA,glnA,gltA,glyA,pgm,tkt,uncA,porA,fn_gyrA	100	100	1	WITH_INHOUSE
B335	6592-11-2846	0.147219	6592	64	467	71	100	134	101	16	11	2846	0.999833	59179.fasta	B335___64___467___71___100___134___101___16___2846___11	809	472.704	7	tkt,porA	592650	4	3	B335	aspA,glnA,gltA,glyA,pgm,uncA,fn_gyrA	100	100	2	WITH_INHOUSE
B335	11383-11-1598	0.115187	11383	64	33	78	18	1136	86	16	11	1598	1	B321-050521-01.fasta	B335___64___33___78___18___1136___86___16___1598___11	987	482.831	9		501980	3	6	B335	aspA,glnA,gltA,glyA,pgm,tkt,uncA,porA,fn_gyrA	100	97.0122	3	WITH_INHOUSE
B335	11379-11-2367	0.053311	11379	64	226	203	189	652	54	16	11	2367	0.999749	B338-070621-02.fasta	B335___64___226___203___189___652___54___16___2367___11	992	469.766	9		533310	4	5	B335	aspA,glnA,gltA,glyA,pgm,tkt,uncA,porA,fn_gyrA	100	98.4378	4	WITH_INHOUSE
B335	10813-11-2351	0.052584	10813	64	22	148	100	94	187	16	11	2351	0.999916	B050-180619-01.fasta	B335___64___22___148___100___94___187___16___2351___11	972	458.981	9		588077	5	4	B335	aspA,glnA,gltA,glyA,pgm,tkt,uncA,porA,fn_gyrA	100	89.7767	5	WITH_INHOUSE
B335	4570-37-1795	0.031113	4570	64	22	20	100	242	204	16	37	1795	0.999163	B320-050521-02.fasta	B335___64___22___20___100___242___204___16___1795___37	285	469.811	8	fn_gyrA	542595	5	3	B335	aspA,glnA,gltA,glyA,pgm,tkt,uncA,porA	100	93.7075	6	WITH_INHOUSE
B335	2491-11-1157	0.010009	2491	64	22	212	100	134	233	16	11	1157	0.998787	22260.fasta	B335___64___22___212___100___134___233___16___1157___11	439	486.319	8	tkt	675788	6	2	B335	aspA,glnA,gltA,glyA,pgm,uncA,porA,fn_gyrA	100	98.5563	11	WITH_INHOUSE
B336	11379-11-2367	0.464153	11379	64	226	203	189	652	54	16	11	2367	0.999665	B338-070621-02.fasta	B336___64___226___203___189___652___54___16___2367___11	992	491.343	9		1943365	0	9	B336	aspA,glnA,gltA,glyA,pgm,tkt,uncA,porA,fn_gyrA	100	100	1	WITH_INHOUSE
B336	1481-31-1836	0.290403	1481	35	5	9	5	8	2	2	31	1836	1	B336-070621-02.fasta	B336___35___5___9___5___8___2___2___1836___31	991	485.304	9		859779	0	9	B336	aspA,glnA,gltA,glyA,pgm,tkt,uncA,porA,fn_gyrA	100	100	2	WITH_INHOUSE
B336	6451-11-348	0.071266	6451	277	105	20	143	134	54	16	11	348	0.999874	50477.fasta	B336___277___105___20___143___134___54___16___348___11	474	481.925	8	gltA	798093	3	5	B336	aspA,glnA,glyA,pgm,tkt,uncA,porA,fn_gyrA	100	97.8512	3	WITH_INHOUSE
B336	7872-11-4468	0.0151	7872	64	22	22	100	134	103	16	11	4468	0.996402	42069.fasta	B336___64___22___22___100___134___103___16___4468___11	285	382.824	7	glyA,porA	750632	5	2	B336	aspA,glnA,gltA,pgm,tkt,uncA,fn_gyrA	100	95.7714	6	WITH_INHOUSE
B336	10817-103-2354	0.0118	10817	258	174	154	193	336	421	131	103	2354	0.994268	B038-110619-03.fasta	B336___258___174___154___193___336___421___131___2354___103	970	288.907	6	pgm,tkt,porA	23519	0	6	B336	aspA,glnA,gltA,glyA,uncA,fn_gyrA	100	89.0133	7	WITH_INHOUSE
B336	8808-11-348	0.011565	8808	76	22	212	614	134	54	560	11	348	0.996402	107381.fasta	B336___76___22___212___614___134___54___560___348___11	562	410.071	7	glyA,uncA	549891	5	2	B336	aspA,glnA,gltA,pgm,tkt,porA,fn_gyrA	100	95.5071	8	WITH_INHOUSE
B337	1044-27-25	0.731823	1044	2	10	2	4	19	3	6	27	25	0.999958	B167-230720-01.fasta	B337___2___10___2___4___19___3___6___25___27	47	491.033	9		1676056	0	9	B337	aspA,glnA,gltA,glyA,pgm,tkt,uncA,porA,fn_gyrA	100	100	1	WITH_INHOUSE
B337	11383-11-1598	0.080634	11383	64	33	78	18	1136	86	16	11	1598	1	B321-050521-01.fasta	B337___64___33___78___18___1136___86___16___1598___11	987	422.276	8	pgm	118670	0	8	B337	aspA,glnA,gltA,glyA,tkt,uncA,porA,fn_gyrA	100	92.9213	2	WITH_INHOUSE
B337	8368-39-680	0.040636	8368	27	22	22	104	115	86	31	39	680	0.999958	50656.fasta	B337___27___22___22___104___115___86___31___680___39	475	396.998	9		68658	1	8	B337	aspA,glnA,gltA,glyA,pgm,tkt,uncA,porA,fn_gyrA	100	97.8644	3	WITH_INHOUSE
B338	11379-11-2367	0.710568	11379	64	226	203	189	652	54	16	11	2367	0.999958	B338-070621-02.fasta	B338___64___226___203___189___652___54___16___2367___11	992	491.998	9		2992383	0	9	B338	aspA,glnA,gltA,glyA,pgm,tkt,uncA,porA,fn_gyrA	100	100	1	WITH_INHOUSE
B338	11383-11-1598	0.206055	11383	64	33	78	18	1136	86	16	11	1598	0.999958	B321-050521-01.fasta	B338___64___33___78___18___1136___86___16___1598___11	987	489.99	9		1534667	3	6	B338	aspA,glnA,gltA,glyA,pgm,tkt,uncA,porA,fn_gyrA	100	100	2	WITH_INHOUSE
B338	7820-11-1603	0.021749	7820	64	288	203	189	134	94	60	11	1603	0.999161	33958.fasta	B338___64___288___203___189___134___94___60___1603___11	707	450.544	6	tkt,uncA,porA	1367221	4	2	B338	aspA,glnA,gltA,glyA,pgm,fn_gyrA	100	100	3	WITH_INHOUSE
B338	8769-11-2372	0.014489	8769	216	22	85	142	134	101	16	11	2372	0.998364	34690.fasta	B338___216___22___85___142___134___101___16___2372___11	719	412.621	5	aspA,glyA,tkt,porA	797714	3	2	B338	glnA,gltA,pgm,uncA,fn_gyrA	100	100	4	WITH_INHOUSE
B339	267-1-73	0.939091	267	4	7	40	4	42	51	1	1	73	0.999412	B339-070621-01.fasta	B339___4___7___40___4___42___51___1___73___1	44	489.226	9		3232186	0	9	B339	aspA,glnA,gltA,glyA,pgm,tkt,uncA,porA,fn_gyrA	100	100	1	WITH_INHOUSE
B342	354-8-957	0.858237	354	8	10	2	2	11	12	6	8	957	1	34524.fasta	B342___8___10___2___2___11___12___6___957___8	33	491.138	8	pgm	4077625	0	8	B342	aspA,glnA,gltA,glyA,tkt,uncA,porA,fn_gyrA	100	100	1	WITH_INHOUSE
B342	19-1-7	0.119001	19	2	1	5	3	2	1	5	1	7	1	5895.fasta	B342___2___1___5___3___2___1___5___7___1	19	380.335	9		130591	0	9	B342	aspA,glnA,gltA,glyA,pgm,tkt,uncA,porA,fn_gyrA	100	91.5956	2	WITH_INHOUSE
B345	383-1-73	0.66805	383	4	7	12	4	42	51	1	1	73	0.999874	B067-020719-01.fasta	B345___4___7___12___4___42___51___1___73___1	44	488.814	9		3153635	0	9	B345	aspA,glnA,gltA,glyA,pgm,tkt,uncA,porA,fn_gyrA	100	100	1	WITH_INHOUSE
B345	563-31-909	0.116372	563	17	5	8	5	8	2	4	31	909	0.995844	B325-250521-01.fasta	B345___17___5___8___5___8___2___4___909___31	117	481.9	9		899277	0	9	B345	aspA,glnA,gltA,glyA,pgm,tkt,uncA,porA,fn_gyrA	100	100	2	WITH_INHOUSE
B353	448-31-639	0.757184	448	61	70	22	18	2	74	47	31	639	0.995765	B353-210621-01.fasta	B353___61___70___22___18___2___74___47___639___31	379	496.486	9		1314283	0	9	B353	aspA,glnA,gltA,glyA,pgm,tkt,uncA,porA,fn_gyrA	100	100	1	WITH_INHOUSE
B354	2162-7-634	0.896638	2162	35	43	8	51	8	2	21	7	634	0.999042	B354-210621-01.fasta	B354___35___43___8___51___8___2___21___634___7	292	492.184	9		1106140	0	9	B354	aspA,glnA,gltA,glyA,pgm,tkt,uncA,porA,fn_gyrA	100	100	1	WITH_INHOUSE
B354	677-19-276	0.05796	677	10	81	50	99	120	76	52	19	276	0.999542	B046-180619-01.fasta	B354___10___81___50___99___120___76___52___276___19	101	406.264	9		24510	0	9	B354	aspA,glnA,gltA,glyA,pgm,tkt,uncA,porA,fn_gyrA	100	86.5667	2	WITH_INHOUSE
B355	267-1-73	0.90124	267	4	7	40	4	42	51	1	1	73	0.999706	B339-070621-01.fasta	B355___4___7___40___4___42___51___1___73___1	44	489.28	9		4929073	0	9	B355	aspA,glnA,gltA,glyA,pgm,tkt,uncA,porA,fn_gyrA	100	100	1	WITH_INHOUSE
B355	2162-31-634	0.025196	2162	35	43	8	51	8	2	21	31	634	0.999202	62524.fasta	B355___35___43___8___51___8___2___21___634___31	292	384.095	9		110069	0	9	B355	aspA,glnA,gltA,glyA,pgm,tkt,uncA,porA,fn_gyrA	100	97.8589	3	WITH_INHOUSE
B357	11378-7-1621	0.842772	11378	35	5	8	51	8	2	21	7	1621	0.998727	B357-210621-01.fasta	B357___35___5___8___51___8___2___21___1621___7	292	491.806	9		233548	0	9	B357	aspA,glnA,gltA,glyA,pgm,tkt,uncA,porA,fn_gyrA	100	100	1	WITH_INHOUSE
B358	45-7-44	0.349133	45	4	7	10	4	1	7	1	7	44	0.999622	B072-020719-02.fasta	B358___4___7___10___4___1___7___1___44___7	28	491.99	9		4250671	0	9	B358	aspA,glnA,gltA,glyA,pgm,tkt,uncA,porA,fn_gyrA	100	100	1	WITH_INHOUSE
B358	267-288-73	0.174575	267	4	7	40	4	42	51	1	288	73	0.999874	107933.fasta	B358___4___7___40___4___42___51___1___73___288	44	480.084	8	fn_gyrA	2366560	5	3	B358	aspA,glnA,gltA,glyA,pgm,tkt,uncA,porA	100	98.845	2	WITH_INHOUSE
B361	230-1-217	0.842766	230	4	7	41	4	42	7	1	1	217	0.999958	B361-210621-01.fasta	B361___4___7___41___4___42___7___1___217___1	44	492.275	9		4704782	0	9	B361	aspA,glnA,gltA,glyA,pgm,tkt,uncA,porA,fn_gyrA	100	100	1	WITH_INHOUSE
B362	267-1-73	0.825812	267	4	7	40	4	42	51	1	1	73	0.999958	B339-070621-01.fasta	B362___4___7___40___4___42___51___1___73___1	44	489.138	9		2911212	0	9	B362	aspA,glnA,gltA,glyA,pgm,tkt,uncA,porA,fn_gyrA	100	100	1	WITH_INHOUSE
B362	677-19-276	0.100946	677	10	81	50	99	120	76	52	19	276	0.999958	B046-180619-01.fasta	B362___10___81___50___99___120___76___52___276___19	101	461.054	9		200254	0	9	B362	aspA,glnA,gltA,glyA,pgm,tkt,uncA,porA,fn_gyrA	100	99.89	2	WITH_INHOUSE
B364	11380-11-200	0.989677	11380	18	33	72	98	116	871	6	11	200	1	B364-210621-01.fasta	B364___18___33___72___98___116___871___6___200___11	993	493.74	9		778619	0	9	B364	aspA,glnA,gltA,glyA,pgm,tkt,uncA,porA,fn_gyrA	100	100	1	WITH_INHOUSE
W021	704-13-886	0.785842	704	2	29	4	27	10	25	57	13	886	0.998731	W021-240919-01.fasta	W021___2___29___4___27___10___25___57___886___13	227	489.188	9		102585	0	9	21-W021	aspA,glnA,gltA,glyA,pgm,tkt,uncA,porA,fn_gyrA	100	100	1	WITH_INHOUSE
W022	683-80-468	0.503776	683	35	43	9	5	121	46	21	80	468	0.998572	42540.fasta	W022___35___43___9___5___121___46___21___468___80	174	489.149	9		2627421	0	9	W022	aspA,glnA,gltA,glyA,pgm,tkt,uncA,porA,fn_gyrA	100	100	1	WITH_INHOUSE
W022	11044-10-11	0.029887	11044	4	7	10	5	2	7	1	10	11	0.990679	94139.fasta	W022___4___7___10___5___2___7___1___11___10	949	161.294	5	gltA,pgm,porA,fn_gyrA	282618	2	3	W022	aspA,glnA,glyA,tkt,uncA	99.944	87.018	7	WITH_INHOUSE
W026	692-4-819	0.172049	692	37	52	57	26	127	29	23	4	819	0.998744	107681.fasta	W026___37___52___57___26___127___29___23___819___4	180	483.491	9		352310	0	9	W026	aspA,glnA,gltA,glyA,pgm,tkt,uncA,porA,fn_gyrA	100	100	1	WITH_INHOUSE
W026	693-13-819	0.051663	693	2	29	4	48	13	24	57	13	819	0.999372	78944.fasta	W026___2___29___4___48___13___24___57___819___13	116	341.233	8	glyA	64594	3	5	W026	aspA,glnA,gltA,pgm,tkt,uncA,porA,fn_gyrA	100	83.3838	5	WITH_INHOUSE
W052	996-4-188	0.682895	996	2	29	84	48	131	25	57	4	188	0.999665	107502.fasta	W052___2___29___84___48___131___25___57___188___4	408	486.29	9		2135215	0	9	W052	aspA,glnA,gltA,glyA,pgm,tkt,uncA,porA,fn_gyrA	100	100	1	WITH_INHOUSE
W052	699-13-6	0.244746	699	37	52	57	26	129	29	23	13	6	0.999958	87100.fasta	W052___37___52___57___26___129___29___23___6___13	136	494.443	6	glnA,gltA,fn_gyrA	283598	1	5	W052	aspA,glyA,pgm,tkt,uncA,porA	100	99.4983	2	WITH_INHOUSE
W053	3904-7-2027	0.074039	3904	1	7	10	349	261	7	1	7	2027	0.999754	112078.fasta	W053___1___7___10___349___261___7___1___2027___7	424	350.66	8	aspA	23510	0	8	W053	glnA,gltA,glyA,pgm,tkt,uncA,porA,fn_gyrA	100	92.9013	3	WITH_INHOUSE
W053	177-31-4477	0.067755	177	17	2	8	5	8	2	4	31	4477	0.99959	107481.fasta	W053___17___2___8___5___8___2___4___4477___31	117	426.081	8	porA	60475	1	7	W053	aspA,glnA,gltA,glyA,pgm,tkt,uncA,fn_gyrA	100	100	5	WITH_INHOUSE
W054	177-31-4123	0.09586	177	17	2	8	5	8	2	4	31	4123	0.998918	100884.fasta	W054___17___2___8___5___8___2___4___4123___31	225	414.285	7	uncA,porA	41435	1	6	W054	aspA,glnA,gltA,glyA,pgm,tkt,fn_gyrA	100	100	2	WITH_INHOUSE
W054	563-31-2648	0.043057	563	17	5	8	5	8	2	4	31	2648	0.999126	42534.fasta	W054___17___5___8___5___8___2___4___2648___31	117	412.277	8	uncA	37584	6	2	W054	aspA,glnA,gltA,glyA,pgm,tkt,porA,fn_gyrA	99.9688	92.81	6	WITH_INHOUSE
W054	11044-10-11	0.039752	11044	4	7	10	5	2	7	1	10	11	0.990347	94139.fasta	W054___4___7___10___5___2___7___1___11___10	949	286.802	4	glnA,pgm,tkt,porA,fn_gyrA	12703	1	3	W054	aspA,gltA,glyA,uncA	99.945	98.1875	9	WITH_INHOUSE
W078	45-80-217	0.0914	45	4	7	10	4	1	7	1	80	217	0.998877	57334.fasta	W078___4___7___10___4___1___7___1___217___80	28	435.504	9		79612	0	9	W078	aspA,glnA,gltA,glyA,pgm,tkt,uncA,porA,fn_gyrA	100	100	2	WITH_INHOUSE
W079	801-36-127	0.251267	801	64	70	68	97	122	106	16	36	127	0.999917	B113-130819-01.fasta	W079___64___70___68___97___122___106___16___127___36	977	462.476	9		250667	0	9	W079	aspA,glnA,gltA,glyA,pgm,tkt,uncA,porA,fn_gyrA	100	100	1	WITH_INHOUSE
W079	19-1-2756	0.120274	19	2	1	5	3	2	1	5	1	2756	0.99879	51015.fasta	W079___2___1___5___3___2___1___5___2756___1	780	399.706	7	porA,fn_gyrA	92171	0	7	W079	aspA,glnA,gltA,glyA,pgm,tkt,uncA	100	98.4429	2	WITH_INHOUSE
W081	563-31-2648	0.116959	563	17	5	8	5	8	2	4	31	2648	0.997701	42534.fasta	W081___17___5___8___5___8___2___4___2648___31	117	461.818	6	glnA,gltA,porA	220552	0	6	W081	aspA,glyA,pgm,tkt,uncA,fn_gyrA	100	100	2	WITH_INHOUSE
W081	5128-31-728	0.054456	5128	35	2	9	432	8	46	21	31	728	0.996281	92360.fasta	W081___35___2___9___432___8___46___21___728___31	467	480.365	5	aspA,glyA,tkt,uncA	187034	3	2	W081	glnA,gltA,pgm,porA,fn_gyrA	100	100	7	WITH_INHOUSE
W082	45-7-49	0.062382	45	4	7	10	4	1	7	1	7	49	0.995053	B037-110619-01.fasta	W082___4___7___10___4___1___7___1___49___7	63	367.727	9		53546	5	4	W082	aspA,glnA,gltA,glyA,pgm,tkt,uncA,porA,fn_gyrA	100	100	7	WITH_INHOUSE
W083	11044-10-11	0.037057	11044	4	7	10	5	2	7	1	10	11	0.991436	94139.fasta	W083___4___7___10___5___2___7___1___11___10	949	227.438	4	gltA,pgm,tkt,porA,fn_gyrA	13672	0	4	W083	aspA,glnA,glyA,uncA	100	88.155	7	WITH_INHOUSE
W083	8845-11-1634	0.033266	8845	64	22	164	98	123	101	60	11	1634	0.991189	57583.fasta	W083___64___22___164___98___123___101___60___1634___11	482	299.567	3	glnA,gltA,glyA,pgm,tkt,uncA	7115	1	2	W083	aspA,porA,fn_gyrA	100	78.88	9	WITH_INHOUSE
W083	1231-31-270	0.032914	1231	27	2	22	104	43	86	31	31	270	0.994771	42085.fasta	W083___27___2___22___104___43___86___31___270___31	466	300.682	7	aspA,uncA	21781	2	5	W083	glnA,gltA,glyA,pgm,tkt,porA,fn_gyrA	100	88.2143	10	WITH_INHOUSE
W083	144-31-204	0.017631	144	17	2	8	5	8	2	21	31	204	0.993	107176.fasta	W083___17___2___8___5___8___2___21___204___31	398	300.206	7	uncA,porA	28294	3	4	W083	aspA,glnA,gltA,glyA,pgm,tkt,fn_gyrA	99.9671	99.5014	18	WITH_INHOUSE
W084	1231-31-270	0.228619	1231	27	2	22	104	43	86	31	31	270	0.999166	42085.fasta	W084___27___2___22___104___43___86___31___270___31	466	484.422	7	aspA,fn_gyrA	237312	0	7	W084	glnA,gltA,glyA,pgm,tkt,uncA,porA	100	100	1	WITH_INHOUSE
W084	607-9-940	0.061993	607	8	2	5	53	11	3	1	9	940	0.99433	31157.fasta	W084___8___2___5___53___11___3___1___940___9	693	288.476	3	aspA,glyA,pgm,tkt,porA,fn_gyrA	37947	1	2	W084	glnA,gltA,uncA	100	99.9167	3	WITH_INHOUSE
W084	11044-10-11	0.029716	11044	4	7	10	5	2	7	1	10	11	0.996748	94139.fasta	W084___4___7___10___5___2___7___1___11___10	949	269.92	5	glnA,glyA,porA,fn_gyrA	13504	2	3	W084	aspA,gltA,pgm,tkt,uncA	100	96.16	10	WITH_INHOUSE
W084	19-1-2756	0.021367	19	2	1	5	3	2	1	5	1	2756	0.998291	51015.fasta	W084___2___1___5___3___2___1___5___2756___1	780	261.061	6	glyA,porA,fn_gyrA	15633	2	4	W084	aspA,glnA,gltA,pgm,tkt,uncA	100	94.4567	14	WITH_INHOUSE
W084	4069-40-363	0.020685	4069	18	2	22	104	1	86	31	40	363	0.996498	108911.fasta	W084___18___2___22___104___1___86___31___363___40	413	391.465	7	aspA,porA	199224	5	2	W084	glnA,gltA,glyA,pgm,tkt,uncA,fn_gyrA	100	94.2629	15	WITH_INHOUSE
W087	267-1-73	0.690076	267	4	7	40	4	42	51	1	1	73	0.999958	B339-070621-01.fasta	W087___4___7___40___4___42___51___1___73___1	44	488.201	9		1387262	0	9	W087	aspA,glnA,gltA,glyA,pgm,tkt,uncA,porA,fn_gyrA	100	100	1	WITH_INHOUSE
W087	4570-37-1795	0.07919	4570	64	22	20	100	242	204	16	37	1795	0.999372	B320-050521-02.fasta	W087___64___22___20___100___242___204___16___1795___37	285	468.469	9		199976	1	8	W087	aspA,glnA,gltA,glyA,pgm,tkt,uncA,porA,fn_gyrA	100	98.23	2	WITH_INHOUSE
W087	10102-11-2366	0.028762	10102	64	22	203	100	134	160	60	11	2366	0.99933	W087-210621-01.fasta	W087___64___22___203___100___134___160___60___2366___11	457	391.492	9		97378	6	3	W087	aspA,glnA,gltA,glyA,pgm,tkt,uncA,porA,fn_gyrA	100	90.4711	3	WITH_INHOUSE
W087	10035-36-1612	0.011752	10035	18	89	77	98	138	17	16	36	1612	0.997445	80565.fasta	W087___18___89___77___98___138___17___16___1612___36	881	268.129	5	aspA,gltA,tkt,porA	28675	1	4	W087	glnA,glyA,pgm,uncA,fn_gyrA	100	86.786	7	WITH_INHOUSE
