# Supplementary material for: Metagenomic Strain-Typing Combined with Isolate Sequencing Provides Increased Resolution of the Genetic Diversity of Campylobacter jejuni Carriage in Wild Birds
Source: Microorganisms. 2023 Jan 3;11(1):121. doi: 10.3390/microorganisms11010121 (PMC9860660; doi:10.3390/microorganisms11010121)
Supplement: Supplementary file 1 [file microorganisms-11-00121-s001.zip › Supplementary_Data_S5.xlsx]

## Sheet: Merged dataset - isolates and a
Strain ID	sampleID	Identification	ST	CC	aspA	glnA	gltA	glyA	pgm	tkt	uncA	Complex Type	fn_gyrA	porA	genome	date	profile_from	Cluster_member	abundance	SNP_clusterID	n_matches	unmatched_alleles_truthcomp	seqID	max_ident	hits_summed_score	n_hits_score	unmatched_alleles	matched_alleles	mean_query_ident	mean_template_ident	qvalue_depth_score	abundance_rank	alleles_seen_before	corscore	match_type	Sampling date	Sampling location	Sampling type	Origin	Group	Subgroup	ST_gyrA_porA	mlst9_profile	mlst7_profile
B015-230519-01	B015	C. jejuni	45	ST-45 complex	4	7	10	4	1	7	1	2052	7	467	B015-230519-01.fasta	2019-05-23	isolate	NA	NA	NA	NA	NA	NA	NA	NA	NA	NA	NA	NA	NA	NA	NA	NA	NA	NA	2019-05-23T00:00:00Z	Dudelange	Bird	Cygnus	Waterfowl	Oie	45-7-467	4___7___10___4___1___7___1___7___467	4___7___10___4___1___7___1
B021-070519-01	B021	C. jejuni	48	ST-48 complex	2	4	1	2	7	1	5	153	3	7	B021-070519-01.fasta	2019-05-07	isolate	NA	NA	NA	NA	NA	NA	NA	NA	NA	NA	NA	NA	NA	NA	NA	NA	NA	NA	2019-05-07T00:00:00Z	Dudelange	Bird	Corvus corone	Sedentary Bird	Corvidés	48-3-7	2___4___1___2___7___1___5___3___7	2___4___1___2___7___1___5
B023-070519-01	B023	C. jejuni	448	?	61	70	22	18	2	74	47	2154	102	2353	B023-070519-01.fasta	2019-05-07	isolate	NA	NA	NA	NA	NA	NA	NA	NA	NA	NA	NA	NA	NA	NA	NA	NA	NA	NA	2019-05-07T00:00:00Z	Dudelange	Bird	Corvus corone	Sedentary Bird	Corvidés	448-102-2353	61___70___22___18___2___74___47___102___2353	61___70___22___18___2___74___47
B025-070519-02	B025	C. jejuni	677	ST-677 complex	10	81	50	99	120	76	52	942	19	276	B025-070519-02.fasta	2019-05-07	isolate	NA	NA	NA	NA	NA	NA	NA	NA	NA	NA	NA	NA	NA	NA	NA	NA	NA	NA	2019-05-07T00:00:00Z	Dudelange	Bird	Corvus corone	Sedentary Bird	Corvidés	677-19-276	10___81___50___99___120___76___52___19___276	10___81___50___99___120___76___52
B026-230519-01	B026	C. jejuni	448	?	61	70	22	18	2	74	47	2154	102	2353	B026-230519-01.fasta	2019-05-23	isolate	NA	NA	NA	NA	NA	NA	NA	NA	NA	NA	NA	NA	NA	NA	NA	NA	NA	NA	2019-05-23T00:00:00Z	Dudelange	Bird	Pica pica	Sedentary Bird	Corvidés	448-102-2353	61___70___22___18___2___74___47___102___2353	61___70___22___18___2___74___47
B027-070519-01	B027	C. jejuni	45	ST-45 complex	4	7	10	4	1	7	1	2155	7	49	B027-070519-01.fasta	2019-05-07	isolate	NA	NA	NA	NA	NA	NA	NA	NA	NA	NA	NA	NA	NA	NA	NA	NA	NA	NA	2019-05-07T00:00:00Z	Dudelange	Bird	Pica pica	Sedentary Bird	Corvidés	45-7-49	4___7___10___4___1___7___1___7___49	4___7___10___4___1___7___1
B028-230519-01	B028	C. jejuni	2491	?	64	22	212	100	134	233	16	2156	11	1634	B028-230519-01.fasta	2019-05-23	isolate	NA	NA	NA	NA	NA	NA	NA	NA	NA	NA	NA	NA	NA	NA	NA	NA	NA	NA	2019-05-23T00:00:00Z	Dudelange	Bird	Corvus corone	Sedentary Bird	Corvidés	2491-11-1634	64___22___212___100___134___233___16___11___1634	64___22___212___100___134___233___16
NA	B028	NA	951	NA	18	100	82	24	138	116	63	NA	31	2358	NA	NA	prediction	B096-300719-02	0.719521	718	NA	NA	B028	0.999971	6521825	9	NA	aspA,glnA,gltA,glyA,pgm,tkt,uncA,porA,fn_gyrA	100	100	494.346	1	0	9	additional strain	2019-05-23T00:00:00Z	Dudelange	Bird	Corvus corone	Sedentary Bird	Corvidés	951-31-2358	18___100___82___24___138___116___63___31___2358	18___100___82___24___138___116___63
B029-110619-02	B029	C. jejuni	448	?	61	70	22	18	2	74	47	2624	31	860	B029-110619-02.fasta	2019-06-11	isolate	NA	NA	NA	NA	NA	NA	NA	NA	NA	NA	NA	NA	NA	NA	NA	NA	NA	NA	2019-06-11T00:00:00Z	Dudelange	Bird	Pica pica	Sedentary Bird	Corvidés	448-31-860	61___70___22___18___2___74___47___31___860	61___70___22___18___2___74___47
NA	B029	NA	10815	NA	18	81	68	143	134	153	16	NA	11	479	NA	NA	prediction	B051-180619-02	0.010677	716	NA	NA	21-B029	0.994196	15790	6	aspA,glnA,uncA	gltA,glyA,pgm,tkt,porA,fn_gyrA	100	86.725	273.411	2	0	6	additional strain	2019-06-11T00:00:00Z	Dudelange	Bird	Pica pica	Sedentary Bird	Corvidés	10815-11-479	18___81___68___143___134___153___16___11___479	18___81___68___143___134___153___16
NA	B035	NA	7831	NA	64	22	85	98	652	270	60	NA	380	4439	NA	NA	prediction	33960	0.434147	490	NA	NA	21-B035	0.999727	947400	9	NA	aspA,glnA,gltA,glyA,pgm,tkt,uncA,porA,fn_gyrA	100	100	490.447	1	0	9	additional strain	2019-06-11T00:00:00Z	Dudelange	Bird	Corvus monedula	Sedentary Bird	Corvidés	7831-380-4439	64___22___85___98___652___270___60___380___4439	64___22___85___98___652___270___60
NA	B035	NA	6427	NA	64	95	20	100	514	101	60	NA	11	1157	NA	NA	prediction	78916	0.115583	691	NA	NA	21-B035	0.999885	550647	9	NA	aspA,glnA,gltA,glyA,pgm,tkt,uncA,porA,fn_gyrA	100	97.0667	472.602	2	2	7	additional strain	2019-06-11T00:00:00Z	Dudelange	Bird	Corvus monedula	Sedentary Bird	Corvidés	6427-11-1157	64___95___20___100___514___101___60___11___1157	64___95___20___100___514___101___60
NA	B035	NA	7825	NA	258	174	474	193	753	595	131	NA	298	4437	NA	NA	prediction	33954	0.017011	488	NA	NA	21-B035	0.994774	21056	5	glnA,gltA,pgm,tkt	aspA,glyA,uncA,porA,fn_gyrA	100	99.07	422.481	13	0	5	additional strain	2019-06-11T00:00:00Z	Dudelange	Bird	Corvus monedula	Sedentary Bird	Corvidés	7825-298-4437	258___174___474___193___753___595___131___298___4437	258___174___474___193___753___595___131
B036-110619-01	B036	C. jejuni	1540	ST-1275 complex	76	33	22	104	43	109	31	2157	40	860	B036-110619-01.fasta	2019-06-11	isolate	NA	NA	NA	NA	NA	NA	NA	NA	NA	NA	NA	NA	NA	NA	NA	NA	NA	NA	2019-06-11T00:00:00Z	Dudelange	Bird	Corvus monedula	Sedentary Bird	Corvidés	1540-40-860	76___33___22___104___43___109___31___40___860	76___33___22___104___43___109___31
B036-110619-03	B036	C. jejuni	10813	?	64	22	148	100	94	187	16	2157	11	2351	B036-110619-03.fasta	2019-06-11	isolate	NA	NA	NA	NA	NA	NA	NA	NA	NA	NA	NA	NA	NA	NA	NA	NA	NA	NA	2019-06-11T00:00:00Z	Dudelange	Bird	Corvus monedula	Sedentary Bird	Corvidés	10813-11-2351	64___22___148___100___94___187___16___11___2351	64___22___148___100___94___187___16
NA	B036	NA	11379	NA	64	226	203	189	652	54	16	NA	11	2367	NA	NA	prediction	B338-070621-02	0.067379	740	NA	NA	B036	0.998374	1223429	7	pgm,porA	aspA,glnA,gltA,glyA,tkt,uncA,fn_gyrA	100	93.83	398.311	4	3	4	additional strain	2019-06-11T00:00:00Z	Dudelange	Bird	Corvus monedula	Sedentary Bird	Corvidés	11379-11-2367	64___226___203___189___652___54___16___11___2367	64___226___203___189___652___54___16
NA	B036	NA	7836	NA	258	174	207	193	336	314	229	NA	99	2347	NA	NA	prediction	B113-130819-02	0.060783	353	NA	NA	B036	0.999338	295978	9	NA	aspA,glnA,gltA,glyA,pgm,tkt,uncA,porA,fn_gyrA	100	99.5089	455.086	5	0	9	additional strain	2019-06-11T00:00:00Z	Dudelange	Bird	Corvus monedula	Sedentary Bird	Corvidés	7836-99-2347	258___174___207___193___336___314___229___99___2347	258___174___207___193___336___314___229
B037-110619-01	B037	C. jejuni	45	ST-45 complex	4	7	10	4	1	7	1	2158	7	49	B037-110619-01.fasta	2019-06-11	isolate	NA	NA	NA	NA	NA	NA	NA	NA	NA	NA	NA	NA	NA	NA	NA	NA	NA	NA	2019-06-11T00:00:00Z	Dudelange	Bird	Corvus monedula	Sedentary Bird	Corvidés	45-7-49	4___7___10___4___1___7___1___7___49	4___7___10___4___1___7___1
NA	B037	NA	6427	NA	64	95	20	100	514	101	60	NA	11	1157	NA	NA	prediction	78916	0.168466	691	NA	NA	B037	0.998675	640141	9	NA	aspA,glnA,gltA,glyA,pgm,tkt,uncA,porA,fn_gyrA	100	99.8067	472.456	1	0	9	additional strain	2019-06-11T00:00:00Z	Dudelange	Bird	Corvus monedula	Sedentary Bird	Corvidés	6427-11-1157	64___95___20___100___514___101___60___11___1157	64___95___20___100___514___101___60
NA	B037	NA	11379	NA	64	226	203	189	652	54	16	NA	11	2367	NA	NA	prediction	B338-070621-02	0.053956	740	NA	NA	B037	0.999611	994498	9	NA	aspA,glnA,gltA,glyA,pgm,tkt,uncA,porA,fn_gyrA	100	100	448.793	3	2	7	additional strain	2019-06-11T00:00:00Z	Dudelange	Bird	Corvus monedula	Sedentary Bird	Corvidés	11379-11-2367	64___226___203___189___652___54___16___11___2367	64___226___203___189___652___54___16
B038-110619-01	B038	C. jejuni	10818	?	64	22	20	100	134	301	16	2159	104	391	B038-110619-01.fasta	2019-06-11	isolate	NA	NA	NA	NA	NA	NA	NA	NA	NA	NA	NA	NA	NA	NA	NA	NA	NA	NA	2019-06-11T00:00:00Z	Dudelange	Bird	Corvus monedula	Sedentary Bird	Corvidés	10818-104-391	64___22___20___100___134___301___16___104___391	64___22___20___100___134___301___16
B038-110619-02	B038	C. jejuni	10811	?	64	33	20	181	94	17	16	2160	36	1279	B038-110619-02.fasta	2019-06-11	isolate	NA	NA	NA	NA	NA	NA	NA	NA	NA	NA	NA	NA	NA	NA	NA	NA	NA	NA	2019-06-11T00:00:00Z	Dudelange	Bird	Corvus monedula	Sedentary Bird	Corvidés	10811-36-1279	64___33___20___181___94___17___16___36___1279	64___33___20___181___94___17___16
B038-110619-03	B038	C. jejuni	10817	?	258	174	154	193	336	421	131	2161	103	2354	B038-110619-03.fasta	2019-06-11	isolate	NA	NA	NA	NA	NA	NA	NA	NA	NA	NA	NA	NA	NA	NA	NA	NA	NA	NA	2019-06-11T00:00:00Z	Dudelange	Bird	Corvus monedula	Sedentary Bird	Corvidés	10817-103-2354	258___174___154___193___336___421___131___103___2354	258___174___154___193___336___421___131
NA	B038	NA	10815	NA	18	81	68	143	134	153	16	NA	11	479	NA	NA	prediction	B051-180619-02	0.197144	716	NA	NA	21-B038	0.999813	650662	8	aspA	glnA,gltA,glyA,pgm,tkt,uncA,porA,fn_gyrA	100	98.2288	477.192	2	1	7	additional strain	2019-06-11T00:00:00Z	Dudelange	Bird	Corvus monedula	Sedentary Bird	Corvidés	10815-11-479	18___81___68___143___134___153___16___11___479	18___81___68___143___134___153___16
B039-110619-03	B039	C. jejuni	10820	?	64	89	319	100	134	103	16	2162	11	1224	B039-110619-03.fasta	2019-06-11	isolate	NA	NA	NA	NA	NA	NA	NA	NA	NA	NA	NA	NA	NA	NA	NA	NA	NA	NA	2019-06-11T00:00:00Z	Dudelange	Bird	Corvus monedula	Sedentary Bird	Corvidés	10820-11-1224	64___89___319___100___134___103___16___11___1224	64___89___319___100___134___103___16
NA	B039	NA	10817	NA	258	174	154	193	336	421	131	NA	103	2354	NA	NA	prediction	B038-110619-03	0.01593	713	NA	NA	21-B039	0.993146	90335	4	gltA,pgm,tkt,porA,fn_gyrA	aspA,glnA,glyA,uncA	100	100	434.253	10	0	4	additional strain	2019-06-11T00:00:00Z	Dudelange	Bird	Corvus monedula	Sedentary Bird	Corvidés	10817-103-2354	258___174___154___193___336___421___131___103___2354	258___174___154___193___336___421___131
B045-180619-01	B045	C. jejuni	464	ST-464 complex	24	2	2	2	10	3	1	596	3	2348	B045-180619-01.fasta	2019-06-18	isolate	NA	NA	NA	NA	NA	NA	NA	NA	NA	NA	NA	NA	NA	NA	NA	NA	NA	NA	2019-06-18T00:00:00Z	Dudelange	Bird	Corvus monedula	Sedentary Bird	Corvidés	464-3-2348	24___2___2___2___10___3___1___3___2348	24___2___2___2___10___3___1
B047-180619-01	B047	C. jejuni	19	ST-21 complex	2	1	5	3	2	1	5	2165	8	327	B047-180619-01.fasta	2019-06-18	isolate	NA	NA	NA	NA	NA	NA	NA	NA	NA	NA	NA	NA	NA	NA	NA	NA	NA	NA	2019-06-18T00:00:00Z	Dudelange	Bird	Falco	Sedentary Bird	Rapace	19-8-327	2___1___5___3___2___1___5___8___327	2___1___5___3___2___1___5
B050-180619-01	B050	C. jejuni	10813	?	64	22	148	100	94	187	16	2166	11	2351	B050-180619-01.fasta	2019-06-18	isolate	NA	NA	NA	NA	NA	NA	NA	NA	NA	NA	NA	NA	NA	NA	NA	NA	NA	NA	2019-06-18T00:00:00Z	Dudelange	Bird	Corvus monedula	Sedentary Bird	Corvidés	10813-11-2351	64___22___148___100___94___187___16___11___2351	64___22___148___100___94___187___16
B050-180619-02	B050	C. jejuni	1080	?	10	2	107	137	120	76	1	2301	74	130	B050-180619-02.fasta	2019-06-18	isolate	NA	NA	NA	NA	NA	NA	NA	NA	NA	NA	NA	NA	NA	NA	NA	NA	NA	NA	2019-06-18T00:00:00Z	Dudelange	Bird	Corvus monedula	Sedentary Bird	Corvidés	1080-74-130	10___2___107___137___120___76___1___74___130	10___2___107___137___120___76___1
NA	B050	NA	7836	NA	258	174	207	193	336	314	229	NA	99	2347	NA	NA	prediction	B113-130819-02	0.039711	353	NA	NA	B050	0.996138	319416	9	NA	aspA,glnA,gltA,glyA,pgm,tkt,uncA,porA,fn_gyrA	100	100	445.257	3	0	9	additional strain	2019-06-18T00:00:00Z	Dudelange	Bird	Corvus monedula	Sedentary Bird	Corvidés	7836-99-2347	258___174___207___193___336___314___229___99___2347	258___174___207___193___336___314___229
B051-180619-02	B051	C. jejuni	10815	?	18	81	68	143	134	153	16	2167	11	479	B051-180619-02.fasta	2019-06-18	isolate	NA	NA	NA	NA	NA	NA	NA	NA	NA	NA	NA	NA	NA	NA	NA	NA	NA	NA	2019-06-18T00:00:00Z	Dudelange	Bird	Corvus corone	Sedentary Bird	Corvidés	10815-11-479	18___81___68___143___134___153___16___11___479	18___81___68___143___134___153___16
NA	B051	NA	2401	NA	64	105	20	287	94	103	16	NA	11	1096	NA	NA	prediction	16380	0.2633	402	NA	NA	21-B051	0.999239	399563	8	porA	aspA,glnA,gltA,glyA,pgm,tkt,uncA,fn_gyrA	100	97.5362	464.049	2	2	6	additional strain	2019-06-18T00:00:00Z	Dudelange	Bird	Corvus corone	Sedentary Bird	Corvidés	2401-11-1096	64___105___20___287___94___103___16___11___1096	64___105___20___287___94___103___16
B052-180619-01	B052	C. jejuni	7815	?	64	105	203	100	134	94	16	2168	11	2352	B052-180619-01.fasta	2019-06-18	isolate	NA	NA	NA	NA	NA	NA	NA	NA	NA	NA	NA	NA	NA	NA	NA	NA	NA	NA	2019-06-18T00:00:00Z	Dudelange	Bird	Corvus monedula	Sedentary Bird	Corvidés	7815-11-2352	64___105___203___100___134___94___16___11___2352	64___105___203___100___134___94___16
NA	B052	NA	11379	NA	64	226	203	189	652	54	16	NA	11	2367	NA	NA	prediction	B338-070621-02	0.413292	740	NA	NA	21-B052	0.999611	2200803	9	NA	aspA,glnA,gltA,glyA,pgm,tkt,uncA,porA,fn_gyrA	100	100	490.234	1	0	9	additional strain	2019-06-18T00:00:00Z	Dudelange	Bird	Corvus monedula	Sedentary Bird	Corvidés	11379-11-2367	64___226___203___189___652___54___16___11___2367	64___226___203___189___652___54___16
NA	B052	NA	6427	NA	64	95	20	100	514	101	60	NA	11	1157	NA	NA	prediction	78916	0.064827	691	NA	NA	21-B052	0.998834	1038261	9	NA	aspA,glnA,gltA,glyA,pgm,tkt,uncA,porA,fn_gyrA	100	97.3967	454.316	3	3	6	additional strain	2019-06-18T00:00:00Z	Dudelange	Bird	Corvus monedula	Sedentary Bird	Corvidés	6427-11-1157	64___95___20___100___514___101___60___11___1157	64___95___20___100___514___101___60
B054-180619-01	B054	C. jejuni	3536	?	64	22	20	100	134	160	16	2169	104	391	B054-180619-01.fasta	2019-06-18	isolate	NA	NA	NA	NA	NA	NA	NA	NA	NA	NA	NA	NA	NA	NA	NA	NA	NA	NA	2019-06-18T00:00:00Z	Dudelange	Bird	Corvus corone	Sedentary Bird	Corvidés	3536-104-391	64___22___20___100___134___160___16___104___391	64___22___20___100___134___160___16
B054-180619-02	B054	C. jejuni	801	?	64	70	68	97	122	106	16	2598	36	127	B054-180619-02.fasta	2019-06-18	isolate	NA	NA	NA	NA	NA	NA	NA	NA	NA	NA	NA	NA	NA	NA	NA	NA	NA	NA	2019-06-18T00:00:00Z	Dudelange	Bird	Corvus corone	Sedentary Bird	Corvidés	801-36-127	64___70___68___97___122___106___16___36___127	64___70___68___97___122___106___16
NA	B054	NA	7882	NA	64	583	22	111	122	303	16	NA	36	2357	NA	NA	prediction	B112-130819-01	0.893644	719	NA	NA	B054	0.999957	5892726	9	NA	aspA,glnA,gltA,glyA,pgm,tkt,uncA,porA,fn_gyrA	100	100	493.643	1	0	9	additional strain	2019-06-18T00:00:00Z	Dudelange	Bird	Corvus corone	Sedentary Bird	Corvidés	7882-36-2357	64___583___22___111___122___303___16___36___2357	64___583___22___111___122___303___16
B063-020719-01	B063	C. jejuni	11384	ST-177 complex	17	2	670	5	8	2	4	2170	31	236	B063-020719-01.fasta	2019-07-02	isolate	NA	NA	NA	NA	NA	NA	NA	NA	NA	NA	NA	NA	NA	NA	NA	NA	NA	NA	2019-07-02T00:00:00Z	Dudelange	Bird	Apus apus	Migratory Bird	Passereau	11384-31-236	17___2___670___5___8___2___4___31___236	17___2___670___5___8___2___4
B063-020719-02	B063	C. jejuni	22	ST-22 complex	1	3	6	4	3	3	3	277	8	70	B063-020719-02.fasta	2019-07-02	isolate	NA	NA	NA	NA	NA	NA	NA	NA	NA	NA	NA	NA	NA	NA	NA	NA	NA	NA	2019-07-02T00:00:00Z	Dudelange	Bird	Apus apus	Migratory Bird	Passereau	22-8-70	1___3___6___4___3___3___3___8___70	1___3___6___4___3___3___3
NA	B063	NA	45	NA	4	7	10	4	1	7	1	NA	7	44	NA	NA	prediction	B072-020719-02	0.381428	36	NA	NA	21-B063	0.999784	4543931	9	NA	aspA,glnA,gltA,glyA,pgm,tkt,uncA,porA,fn_gyrA	100	100	491.308	1	0	9	additional strain	2019-07-02T00:00:00Z	Dudelange	Bird	Apus apus	Migratory Bird	Passereau	45-7-44	4___7___10___4___1___7___1___7___44	4___7___10___4___1___7___1
NA	B063	NA	8202	NA	4	22	40	4	42	51	1	NA	1	73	NA	NA	prediction	47721	0.250081	21	NA	NA	21-B063	0.999741	2649941	8	gltA	aspA,glnA,glyA,pgm,tkt,uncA,porA,fn_gyrA	100	99.6075	486.904	2	3	5	additional strain	2019-07-02T00:00:00Z	Dudelange	Bird	Apus apus	Migratory Bird	Passereau	8202-1-73	4___22___40___4___42___51___1___1___73	4___22___40___4___42___51___1
B067-020719-01	B067	C. jejuni	383	ST-283 complex	4	7	12	4	42	51	1	251	1	73	B067-020719-01.fasta	2019-07-02	isolate	NA	NA	NA	NA	NA	NA	NA	NA	NA	NA	NA	NA	NA	NA	NA	NA	NA	NA	2019-07-02T00:00:00Z	Dudelange	Bird	Pica pica	Sedentary Bird	Corvidés	383-1-73	4___7___12___4___42___51___1___1___73	4___7___12___4___42___51___1
NA	B067	NA	1080	NA	10	2	107	137	120	76	1	NA	74	130	NA	NA	prediction	B300-140421-01	0.754062	731	NA	NA	21-B067	0.999957	5382798	9	NA	aspA,glnA,gltA,glyA,pgm,tkt,uncA,porA,fn_gyrA	100	100	491.499	1	0	9	additional strain	2019-07-02T00:00:00Z	Dudelange	Bird	Pica pica	Sedentary Bird	Corvidés	1080-74-130	10___2___107___137___120___76___1___74___130	10___2___107___137___120___76___1
B068-020719-02	B068	C. jejuni	383	ST-283 complex	4	7	12	4	42	51	1	251	1	73	B068-020719-02.fasta	2019-07-02	isolate	NA	NA	NA	NA	NA	NA	NA	NA	NA	NA	NA	NA	NA	NA	NA	NA	NA	NA	2019-07-02T00:00:00Z	Dudelange	Bird	Pica pica	Sedentary Bird	Corvidés	383-1-73	4___7___12___4___42___51___1___1___73	4___7___12___4___42___51___1
B071-020719-01	B071	C. jejuni	45	ST-45 complex	4	7	10	4	1	7	1	2171	7	44	B071-020719-01.fasta	2019-07-02	isolate	NA	NA	NA	NA	NA	NA	NA	NA	NA	NA	NA	NA	NA	NA	NA	NA	NA	NA	2019-07-02T00:00:00Z	Dudelange	Bird	Corvus corone	Sedentary Bird	Corvidés	45-7-44	4___7___10___4___1___7___1___7___44	4___7___10___4___1___7___1
NA	B076	NA	383	NA	4	7	12	4	42	51	1	NA	1	73	NA	NA	prediction	B067-020719-01	0.822818	21	NA	NA	21-B076	0.997379	4999472	9	NA	aspA,glnA,gltA,glyA,pgm,tkt,uncA,porA,fn_gyrA	100	100	489.292	1	0	9	additional strain	2019-07-15T00:00:00Z	Dudelange	Bird	Falco	Sedentary Bird	Rapace	383-1-73	4___7___12___4___42___51___1___1___73	4___7___12___4___42___51___1
NA	B077	NA	383	NA	4	7	12	4	42	51	1	NA	1	73	NA	NA	prediction	B067-020719-01	0.813906	21	NA	NA	21-B077	0.997322	5658226	9	NA	aspA,glnA,gltA,glyA,pgm,tkt,uncA,porA,fn_gyrA	100	100	489.358	1	0	9	additional strain	2019-07-15T00:00:00Z	Dudelange	Bird	Turdus	Migratory Bird	Passereau	383-1-73	4___7___12___4___42___51___1___1___73	4___7___12___4___42___51___1
NA	B078	NA	383	NA	4	7	12	4	42	51	1	NA	1	73	NA	NA	prediction	B067-020719-01	0.80011	21	NA	NA	21-B078	0.99849	3360253	9	NA	aspA,glnA,gltA,glyA,pgm,tkt,uncA,porA,fn_gyrA	100	100	489.22	1	0	9	additional strain	2019-07-15T00:00:00Z	Dudelange	Bird	Pica pica	Sedentary Bird	Corvidés	383-1-73	4___7___12___4___42___51___1___1___73	4___7___12___4___42___51___1
NA	B080	NA	383	NA	4	7	12	4	42	51	1	NA	1	73	NA	NA	prediction	B067-020719-01	0.803633	21	NA	NA	21-B080	0.997409	3207222	9	NA	aspA,glnA,gltA,glyA,pgm,tkt,uncA,porA,fn_gyrA	100	100	489.236	1	0	9	additional strain	2019-07-15T00:00:00Z	Dudelange	Bird	Corvus monedula	Sedentary Bird	Corvidés	383-1-73	4___7___12___4___42___51___1___1___73	4___7___12___4___42___51___1
NA	B082	NA	383	NA	4	7	12	4	42	51	1	NA	1	73	NA	NA	prediction	B067-020719-01	0.824787	21	NA	NA	21-B082	0.997666	1798330	9	NA	aspA,glnA,gltA,glyA,pgm,tkt,uncA,porA,fn_gyrA	100	100	489.381	1	0	9	additional strain	2019-07-15T00:00:00Z	Dudelange	Bird	Falco	Sedentary Bird	Rapace	383-1-73	4___7___12___4___42___51___1___1___73	4___7___12___4___42___51___1
B083-160719-02	B083	C. jejuni	383	ST-283 complex	4	7	12	4	42	51	1	251	1	73	B083-160719-02.fasta	2019-07-15	isolate	NA	NA	NA	NA	NA	NA	NA	NA	NA	NA	NA	NA	NA	NA	NA	NA	NA	NA	2019-07-15T00:00:00Z	Dudelange	Bird	Falco	Sedentary Bird	Rapace	383-1-73	4___7___12___4___42___51___1___1___73	4___7___12___4___42___51___1
B086-160719-01	B086	C. jejuni	383	ST-283 complex	4	7	12	4	42	51	1	251	1	73	B086-160719-01.fasta	2019-07-15	isolate	NA	NA	NA	NA	NA	NA	NA	NA	NA	NA	NA	NA	NA	NA	NA	NA	NA	NA	2019-07-15T00:00:00Z	Dudelange	Bird	Columba	Sedentary Bird	Pigeon	383-1-73	4___7___12___4___42___51___1___1___73	4___7___12___4___42___51___1
B096-300719-02	B096	C. jejuni	951	?	18	100	82	24	138	116	63	2277	31	2358	B096-300719-02.fasta	2019-07-30	isolate	NA	NA	NA	NA	NA	NA	NA	NA	NA	NA	NA	NA	NA	NA	NA	NA	NA	NA	2019-07-30T00:00:00Z	Dudelange	Bird	Corvus corone	Sedentary Bird	Corvidés	951-31-2358	18___100___82___24___138___116___63___31___2358	18___100___82___24___138___116___63
B100-300719-01	B100	C. jejuni	383	ST-283 complex	4	7	12	4	42	51	1	251	1	73	B100-300719-01.fasta	2019-07-30	isolate	NA	NA	NA	NA	NA	NA	NA	NA	NA	NA	NA	NA	NA	NA	NA	NA	NA	NA	2019-07-30T00:00:00Z	Dudelange	Bird	Apus apus	Migratory Bird	Passereau	383-1-73	4___7___12___4___42___51___1___1___73	4___7___12___4___42___51___1
B100-300719-02	B100	C. jejuni	475	ST-48 complex	2	4	1	4	19	62	5	827	5	67	B100-300719-02.fasta	2019-07-30	isolate	NA	NA	NA	NA	NA	NA	NA	NA	NA	NA	NA	NA	NA	NA	NA	NA	NA	NA	2019-07-30T00:00:00Z	Dudelange	Bird	Apus apus	Migratory Bird	Passereau	475-5-67	2___4___1___4___19___62___5___5___67	2___4___1___4___19___62___5
B103-300719-02	B103	C. jejuni	177	ST-177 complex	17	2	8	5	8	2	4	2172	31	236	B103-300719-02.fasta	2019-07-30	isolate	NA	NA	NA	NA	NA	NA	NA	NA	NA	NA	NA	NA	NA	NA	NA	NA	NA	NA	2019-07-30T00:00:00Z	Dudelange	Bird	Turdus	Migratory Bird	Passereau	177-31-236	17___2___8___5___8___2___4___31___236	17___2___8___5___8___2___4
NA	B103	NA	383	NA	4	7	12	4	42	51	1	NA	1	73	NA	NA	prediction	B067-020719-01	0.782585	21	NA	NA	21-B103	0.999109	3072627	9	NA	aspA,glnA,gltA,glyA,pgm,tkt,uncA,porA,fn_gyrA	100	100	489.268	1	0	9	additional strain	2019-07-30T00:00:00Z	Dudelange	Bird	Turdus	Migratory Bird	Passereau	383-1-73	4___7___12___4___42___51___1___1___73	4___7___12___4___42___51___1
B112-130819-01	B112	C. jejuni	7882	?	64	583	22	111	122	303	16	2599	36	2357	B112-130819-01.fasta	2019-08-13	isolate	NA	NA	NA	NA	NA	NA	NA	NA	NA	NA	NA	NA	NA	NA	NA	NA	NA	NA	2019-08-13T00:00:00Z	Dudelange	Bird	Corvus corone	Sedentary Bird	Corvidés	7882-36-2357	64___583___22___111___122___303___16___36___2357	64___583___22___111___122___303___16
B114-130819-01	B114	C. jejuni	10810	?	94	117	90	125	1094	147	100	2173	101	2355	B114-130819-01.fasta	2019-08-13	isolate	NA	NA	NA	NA	NA	NA	NA	NA	NA	NA	NA	NA	NA	NA	NA	NA	NA	NA	2019-08-13T00:00:00Z	Dudelange	Bird	Turdus	Migratory Bird	Passereau	10810-101-2355	94___117___90___125___1094___147___100___101___2355	94___117___90___125___1094___147___100
B114-130819-03	B114	C. jejuni	1277	?	96	135	99	136	183	140	113	2600	105	2359	B114-130819-03.fasta	2019-08-13	isolate	NA	NA	NA	NA	NA	NA	NA	NA	NA	NA	NA	NA	NA	NA	NA	NA	NA	NA	2019-08-13T00:00:00Z	Dudelange	Bird	Turdus	Migratory Bird	Passereau	1277-105-2359	96___135___99___136___183___140___113___105___2359	96___135___99___136___183___140___113
B119-270819-01	B119	C. jejuni	11004	?	15	33	72	875	753	103	16	2601	106	1772	B119-270819-01.fasta	2019-08-27	isolate	NA	NA	NA	NA	NA	NA	NA	NA	NA	NA	NA	NA	NA	NA	NA	NA	NA	NA	2019-08-27T00:00:00Z	Dudelange	Bird	Pica pica	Sedentary Bird	Corvidés	11004-106-1772	15___33___72___875___753___103___16___106___1772	15___33___72___875___753___103___16
B121-270819-02	B121	C. jejuni	6591	?	64	105	20	77	94	103	16	2602	11	1634	B121-270819-02.fasta	2019-08-27	isolate	NA	NA	NA	NA	NA	NA	NA	NA	NA	NA	NA	NA	NA	NA	NA	NA	NA	NA	2019-08-27T00:00:00Z	Dudelange	Bird	Corvus corone	Sedentary Bird	Corvidés	6591-11-1634	64___105___20___77___94___103___16___11___1634	64___105___20___77___94___103___16
B122-270819-02	B122	C. jejuni	19	ST-21 complex	2	1	5	3	2	1	5	2165	8	327	B122-270819-02.fasta	2019-08-27	isolate	NA	NA	NA	NA	NA	NA	NA	NA	NA	NA	NA	NA	NA	NA	NA	NA	NA	NA	2019-08-27T00:00:00Z	Dudelange	Bird	Buteo buteo	Sedentary Bird	Rapace	19-8-327	2___1___5___3___2___1___5___8___327	2___1___5___3___2___1___5
B123-270819-01	B123	C. jejuni	19	ST-21 complex	2	1	5	3	2	1	5	2165	8	327	B123-270819-01.fasta	2019-08-27	isolate	NA	NA	NA	NA	NA	NA	NA	NA	NA	NA	NA	NA	NA	NA	NA	NA	NA	NA	2019-08-27T00:00:00Z	Dudelange	Bird	Falco	Sedentary Bird	Rapace	19-8-327	2___1___5___3___2___1___5___8___327	2___1___5___3___2___1___5
NA	B155	NA	692	NA	37	52	57	26	127	29	23	NA	4	3123	NA	NA	prediction	78931	0.31414	692	NA	NA	21-B155	0.994563	3021807	8	porA	aspA,glnA,gltA,glyA,pgm,tkt,uncA,fn_gyrA	100	100	474.126	1	0	8	additional strain	2019-10-09T00:00:00Z	Wasserbillig	Bird	Anas	Waterfowl	Oie	692-4-3123	37___52___57___26___127___29___23___4___3123	37___52___57___26___127___29___23
B158-221019-01	B158	C. jejuni	5846	?	76	105	72	104	124	96	31	2304	40	858	B158-221019-01.fasta	2019-10-22	isolate	NA	NA	NA	NA	NA	NA	NA	NA	NA	NA	NA	NA	NA	NA	NA	NA	NA	NA	2019-10-22T00:00:00Z	Dudelange	Bird	Corvus corone	Sedentary Bird	Corvidés	5846-40-858	76___105___72___104___124___96___31___40___858	76___105___72___104___124___96___31
B167-230720-01	B167	C. jejuni	1044	ST-658	2	10	2	4	19	3	6	84	27	25	B167-230720-01.fasta	2020-07-23	isolate	NA	NA	NA	NA	NA	NA	NA	NA	NA	NA	NA	NA	NA	NA	NA	NA	NA	NA	2020-07-23T00:00:00Z	Dudelange	Bird	Apus apus	Migratory Bird	Passereau	1044-27-25	2___10___2___4___19___3___6___27___25	2___10___2___4___19___3___6
B189-130820-01	B189	C. jejuni	8614	ST-1332	2	1	4	28	58	672	58	2612	36	6	B189-130820-01.fasta	2020-08-13	isolate	NA	NA	NA	NA	NA	NA	NA	NA	NA	NA	NA	NA	NA	NA	NA	NA	NA	NA	2020-08-13T00:00:00Z	Dudelange	Bird	Turdus	Migratory Bird	Passereau	8614-36-6	2___1___4___28___58___672___58___36___6	2___1___4___28___58___672___58
B190-130820-01	B190	C. jejuni	11	ST-45	48	7	10	4	1	7	1	414	7	217	B190-130820-01.fasta	2020-08-13	isolate	NA	NA	NA	NA	NA	NA	NA	NA	NA	NA	NA	NA	NA	NA	NA	NA	NA	NA	2020-08-13T00:00:00Z	Dudelange	Bird	Turdus	Migratory Bird	Passereau	11-7-217	48___7___10___4___1___7___1___7___217	48___7___10___4___1___7___1
NA	B190	NA	1277	NA	96	135	99	136	183	140	113	NA	105	2359	NA	NA	prediction	B114-130819-03	0.473431	722	NA	NA	21-B190	0.999611	2142462	9	NA	aspA,glnA,gltA,glyA,pgm,tkt,uncA,porA,fn_gyrA	100	100	493.055	1	0	9	additional strain	2020-08-13T00:00:00Z	Dudelange	Bird	Turdus	Migratory Bird	Passereau	1277-105-2359	96___135___99___136___183___140___113___105___2359	96___135___99___136___183___140___113
B193-200820-02	B193	C. jejuni	5207	NA	37	187	4	28	19	24	23	2614	51	2356	B193-200820-02.fasta	2020-08-20	isolate	NA	NA	NA	NA	NA	NA	NA	NA	NA	NA	NA	NA	NA	NA	NA	NA	NA	NA	2020-08-20T00:00:00Z	Wasserbillig	Bird	Anas	Waterfowl	Oie	5207-51-2356	37___187___4___28___19___24___23___51___2356	37___187___4___28___19___24___23
B194-200820-01	B194	C. jejuni	8614	ST-1332	2	1	4	28	58	672	58	2612	36	6	B194-200820-01.fasta	2020-08-20	isolate	NA	NA	NA	NA	NA	NA	NA	NA	NA	NA	NA	NA	NA	NA	NA	NA	NA	NA	2020-08-20T00:00:00Z	Wasserbillig	Bird	Alopochen aegyptiacus	Waterfowl	Oie	8614-36-6	2___1___4___28___58___672___58___36___6	2___1___4___28___58___672___58
B198-200820-01	B198	C. jejuni	11	ST-45	48	7	10	4	1	7	1	414	7	217	B198-200820-01.fasta	2020-08-20	isolate	NA	NA	NA	NA	NA	NA	NA	NA	NA	NA	NA	NA	NA	NA	NA	NA	NA	NA	2020-08-20T00:00:00Z	Wasserbillig	Bird	Alopochen aegyptiacus	Waterfowl	Oie	11-7-217	48___7___10___4___1___7___1___7___217	48___7___10___4___1___7___1
B203-270820-01	B203	C. jejuni	11385	?	4	43	9	5	8	46	21	3163	80	203	B203-270820-01.fasta	2020-08-27	isolate	NA	NA	NA	NA	NA	NA	NA	NA	NA	NA	NA	NA	NA	NA	NA	NA	NA	NA	2020-08-27T00:00:00Z	Dudelange	Bird	Corvus corone	Sedentary Bird	Corvidés	11385-80-203	4___43___9___5___8___46___21___80___203	4___43___9___5___8___46___21
B203-270820-02	B203	C. jejuni	11381	?	577	2	397	91	884	748	51	3164	109	2368	B203-270820-02.fasta	2020-08-27	isolate	NA	NA	NA	NA	NA	NA	NA	NA	NA	NA	NA	NA	NA	NA	NA	NA	NA	NA	2020-08-27T00:00:00Z	Dudelange	Bird	Corvus corone	Sedentary Bird	Corvidés	11381-109-2368	577___2___397___91___884___748___51___109___2368	577___2___397___91___884___748___51
B203-270820-04	B203	C. jejuni	677	ST-677 complex	10	81	50	99	120	76	52	36	19	276	B203-270820-04.fasta	2020-08-27	isolate	NA	NA	NA	NA	NA	NA	NA	NA	NA	NA	NA	NA	NA	NA	NA	NA	NA	NA	2020-08-27T00:00:00Z	Dudelange	Bird	Corvus corone	Sedentary Bird	Corvidés	677-19-276	10___81___50___99___120___76___52___19___276	10___81___50___99___120___76___52
B221-240920-01	B221	C. jejuni	1294	?	2	59	96	48	131	24	57	2460	13	152	B221-240920-01.fasta	2020-09-24	isolate	NA	NA	NA	NA	NA	NA	NA	NA	NA	NA	NA	NA	NA	NA	NA	NA	NA	NA	2020-09-24T00:00:00Z	Wasserbillig	Bird	Alopochen aegyptiacus	Waterfowl	Oie	1294-13-152	2___59___96___48___131___24___57___13___152	2___59___96___48___131___24___57
B250-060321-01	B250	C. jejuni	11376	?	578	143	116	151	198	189	33	3165	108	2370	B250-060321-01.fasta	2021-03-06	isolate	NA	NA	NA	NA	NA	NA	NA	NA	NA	NA	NA	NA	NA	NA	NA	NA	NA	NA	2021-03-06T00:00:00Z	Uerbersyren	Bird	Emberiza citrinella	Sedentary Bird	Passereau	11376-108-2370	578___143___116___151___198___189___33___108___2370	578___143___116___151___198___189___33
B251-060321-01	B251	C. jejuni	11376	?	578	143	116	151	198	189	33	3165	108	2370	B251-060321-01.fasta	2021-03-06	isolate	NA	NA	NA	NA	NA	NA	NA	NA	NA	NA	NA	NA	NA	NA	NA	NA	NA	NA	2021-03-06T00:00:00Z	Uerbersyren	Bird	Emberiza citrinella	Sedentary Bird	Passereau	11376-108-2370	578___143___116___151___198___189___33___108___2370	578___143___116___151___198___189___33
B266-270321-01	B266	C. jejuni	6313	?	323	439	384	483	611	512	371	3166	107	2369	B266-270321-01.fasta	2021-03-27	isolate	NA	NA	NA	NA	NA	NA	NA	NA	NA	NA	NA	NA	NA	NA	NA	NA	NA	NA	2021-03-27T00:00:00Z	Uerbersyren	Bird	Sylvia atricapilla	Migratory Bird	Passereau	6313-107-2369	323___439___384___483___611___512___371___107___2369	323___439___384___483___611___512___371
B284-140421-02	B284	C. jejuni	11413	?	95	795	671	892	1137	872	717	3257	22	2371	B284-140421-02.fasta	2021-04-14	isolate	NA	NA	NA	NA	NA	NA	NA	NA	NA	NA	NA	NA	NA	NA	NA	NA	NA	NA	2021-04-14T00:00:00Z	Uerbersyren	Bird	Sylvia atricapilla	Migratory Bird	Passereau	11413-22-2371	95___795___671___892___1137___872___717___22___2371	95___795___671___892___1137___872___717
B285-140421-02	B285	C. jejuni	1316	?	95	2	94	127	181	144	110	3167	74	463	B285-140421-02.fasta	2021-04-14	isolate	NA	NA	NA	NA	NA	NA	NA	NA	NA	NA	NA	NA	NA	NA	NA	NA	NA	NA	2021-04-14T00:00:00Z	Uerbersyren	Bird	Sylvia atricapilla	Migratory Bird	Passereau	1316-74-463	95___2___94___127___181___144___110___74___463	95___2___94___127___181___144___110
B288-140421-02	B288	C. jejuni	6313	?	323	439	384	483	611	512	371	3168	107	2369	B288-140421-02.fasta	2021-04-14	isolate	NA	NA	NA	NA	NA	NA	NA	NA	NA	NA	NA	NA	NA	NA	NA	NA	NA	NA	2021-04-14T00:00:00Z	Uerbersyren	Bird	Sylvia atricapilla	Migratory Bird	Passereau	6313-107-2369	323___439___384___483___611___512___371___107___2369	323___439___384___483___611___512___371
B299-140421-01	B299	C. jejuni	6313	?	323	439	384	483	611	512	371	3168	107	2369	B299-140421-01.fasta	2021-04-14	isolate	NA	NA	NA	NA	NA	NA	NA	NA	NA	NA	NA	NA	NA	NA	NA	NA	NA	NA	2021-04-14T00:00:00Z	Uerbersyren	Bird	Sylvia atricapilla	Migratory Bird	Passereau	6313-107-2369	323___439___384___483___611___512___371___107___2369	323___439___384___483___611___512___371
B300-140421-01	B300	C. jejuni	1080	?	10	2	107	137	120	76	1	3169	74	130	B300-140421-01.fasta	2021-04-14	isolate	NA	NA	NA	NA	NA	NA	NA	NA	NA	NA	NA	NA	NA	NA	NA	NA	NA	NA	2021-04-14T00:00:00Z	Uerbersyren	Bird	Sylvia atricapilla	Migratory Bird	Passereau	1080-74-130	10___2___107___137___120___76___1___74___130	10___2___107___137___120___76___1
B302-140421-01	B302	C. jejuni	6313	?	323	439	384	483	611	512	371	3168	107	2369	B302-140421-01.fasta	2021-04-14	isolate	NA	NA	NA	NA	NA	NA	NA	NA	NA	NA	NA	NA	NA	NA	NA	NA	NA	NA	2021-04-14T00:00:00Z	Uerbersyren	Bird	Sylvia atricapilla	Migratory Bird	Passereau	6313-107-2369	323___439___384___483___611___512___371___107___2369	323___439___384___483___611___512___371
B303-140421-01	B303	C. jejuni	11376	?	578	143	116	151	198	189	33	3165	108	2370	B303-140421-01.fasta	2021-04-14	isolate	NA	NA	NA	NA	NA	NA	NA	NA	NA	NA	NA	NA	NA	NA	NA	NA	NA	NA	2021-04-14T00:00:00Z	Uerbersyren	Bird	Emberiza citrinella	Sedentary Bird	Passereau	11376-108-2370	578___143___116___151___198___189___33___108___2370	578___143___116___151___198___189___33
B308-140421-01	B308	C. jejuni	11376	?	578	143	116	151	198	189	33	3165	108	2370	B308-140421-01.fasta	2021-04-14	isolate	NA	NA	NA	NA	NA	NA	NA	NA	NA	NA	NA	NA	NA	NA	NA	NA	NA	NA	2021-04-14T00:00:00Z	Uerbersyren	Bird	Emberiza citrinella	Sedentary Bird	Passereau	11376-108-2370	578___143___116___151___198___189___33___108___2370	578___143___116___151___198___189___33
B318-050521-01	B318	C. jejuni	45	ST-45 complex	4	7	10	4	1	7	1	2042	7	49	B318-050521-01.fasta	2021-05-05	isolate	NA	NA	NA	NA	NA	NA	NA	NA	NA	NA	NA	NA	NA	NA	NA	NA	NA	NA	2021-05-05T00:00:00Z	Dudelange	Bird	Asio otus	Sedentary Bird	Rapace	45-7-49	4___7___10___4___1___7___1___7___49	4___7___10___4___1___7___1
B320-050521-02	B320	C. jejuni	4570	?	64	22	20	100	242	204	16	3170	37	1795	B320-050521-02.fasta	2021-05-05	isolate	NA	NA	NA	NA	NA	NA	NA	NA	NA	NA	NA	NA	NA	NA	NA	NA	NA	NA	2021-05-05T00:00:00Z	Dudelange	Bird	Pica pica	Sedentary Bird	Corvidés	4570-37-1795	64___22___20___100___242___204___16___37___1795	64___22___20___100___242___204___16
B321-050521-01	B321	C. jejuni	11383	?	64	33	78	18	1136	86	16	3171	11	1598	B321-050521-01.fasta	2021-05-05	isolate	NA	NA	NA	NA	NA	NA	NA	NA	NA	NA	NA	NA	NA	NA	NA	NA	NA	NA	2021-05-05T00:00:00Z	Dudelange	Bird	Pica pica	Sedentary Bird	Corvidés	11383-11-1598	64___33___78___18___1136___86___16___11___1598	64___33___78___18___1136___86___16
B325-250521-01	B325	C. jejuni	563	ST-177 complex	17	5	8	5	8	2	4	3172	31	909	B325-250521-01.fasta	2021-05-25	isolate	NA	NA	NA	NA	NA	NA	NA	NA	NA	NA	NA	NA	NA	NA	NA	NA	NA	NA	2021-05-25T00:00:00Z	Dudelange	Bird	Corvus monedula	Sedentary Bird	Corvidés	563-31-909	17___5___8___5___8___2___4___31___909	17___5___8___5___8___2___4
B326-250521-01	B326	C. jejuni	4570	?	64	22	20	100	242	204	16	3170	37	1795	B326-250521-01.fasta	2021-05-25	isolate	NA	NA	NA	NA	NA	NA	NA	NA	NA	NA	NA	NA	NA	NA	NA	NA	NA	NA	2021-05-25T00:00:00Z	Dudelange	Bird	Corvus monedula	Sedentary Bird	Corvidés	4570-37-1795	64___22___20___100___242___204___16___37___1795	64___22___20___100___242___204___16
NA	B326	NA	11383	NA	64	33	78	18	1136	86	16	NA	11	1598	NA	NA	prediction	B321-050521-01	0.411214	734	NA	NA	B326	0.999986	1443315	9	NA	aspA,glnA,gltA,glyA,pgm,tkt,uncA,porA,fn_gyrA	100	100	494.367	1	0	9	additional strain	2021-05-25T00:00:00Z	Dudelange	Bird	Corvus monedula	Sedentary Bird	Corvidés	11383-11-1598	64___33___78___18___1136___86___16___11___1598	64___33___78___18___1136___86___16
NA	B326	NA	448	NA	61	70	22	18	2	74	47	NA	31	860	NA	NA	prediction	B029-110619-02	0.13621	351	NA	NA	B326	0.999986	317344	9	NA	aspA,glnA,gltA,glyA,pgm,tkt,uncA,porA,fn_gyrA	100	98.3278	452.828	3	1	8	additional strain	2021-05-25T00:00:00Z	Dudelange	Bird	Corvus monedula	Sedentary Bird	Corvidés	448-31-860	61___70___22___18___2___74___47___31___860	61___70___22___18___2___74___47
B327-250521-01	B327	C. jejuni	11382	?	80	70	164	98	123	229	16	3173	31	1468	B327-250521-01.fasta	2021-05-25	isolate	NA	NA	NA	NA	NA	NA	NA	NA	NA	NA	NA	NA	NA	NA	NA	NA	NA	NA	2021-05-25T00:00:00Z	Dudelange	Bird	Corvus corone	Sedentary Bird	Corvidés	11382-31-1468	80___70___164___98___123___229___16___31___1468	80___70___164___98___123___229___16
B328-250521-02	B328	C. jejuni	6386	?	64	95	20	100	514	301	60	3174	36	406	B328-250521-02.fasta	2021-05-25	isolate	NA	NA	NA	NA	NA	NA	NA	NA	NA	NA	NA	NA	NA	NA	NA	NA	NA	NA	2021-05-25T00:00:00Z	Dudelange	Bird	Corvus corone	Sedentary Bird	Corvidés	6386-36-406	64___95___20___100___514___301___60___36___406	64___95___20___100___514___301___60
B329-250521-01	B329	C. jejuni	677	ST-677 complex	10	81	50	99	120	76	52	36	19	276	B329-250521-01.fasta	2021-05-25	isolate	NA	NA	NA	NA	NA	NA	NA	NA	NA	NA	NA	NA	NA	NA	NA	NA	NA	NA	2021-05-25T00:00:00Z	Dudelange	Bird	Turdus	Migratory Bird	Passereau	677-19-276	10___81___50___99___120___76___52___19___276	10___81___50___99___120___76___52
NA	B329	NA	1021	NA	17	2	9	5	8	46	21	NA	80	1683	NA	NA	prediction	ERR904615_innuendo	0.018259	743	NA	NA	B329	0.992326	96540	5	pgm,tkt,uncA,porA	aspA,glnA,gltA,glyA,fn_gyrA	100	97.276	360.9	2	1	4	additional strain	2021-05-25T00:00:00Z	Dudelange	Bird	Turdus	Migratory Bird	Passereau	1021-80-1683	17___2___9___5___8___46___21___80___1683	17___2___9___5___8___46___21
B330-250521-01	B330	C. jejuni	677	ST-677 complex	10	81	50	99	120	76	52	2070	19	276	B330-250521-01.fasta	2021-05-25	isolate	NA	NA	NA	NA	NA	NA	NA	NA	NA	NA	NA	NA	NA	NA	NA	NA	NA	NA	2021-05-25T00:00:00Z	Dudelange	Bird	Sturnus	Sedentary Bird	Passereau	677-19-276	10___81___50___99___120___76___52___19___276	10___81___50___99___120___76___52
B331-250521-01	B331	C. jejuni	45	ST-45 complex	4	7	10	4	1	7	1	297	7	49	B331-250521-01.fasta	2021-05-25	isolate	NA	NA	NA	NA	NA	NA	NA	NA	NA	NA	NA	NA	NA	NA	NA	NA	NA	NA	2021-05-25T00:00:00Z	Dudelange	Bird	Parus major	Sedentary Bird	Passereau	45-7-49	4___7___10___4___1___7___1___7___49	4___7___10___4___1___7___1
NA	B331	NA	677	NA	10	81	50	99	120	76	52	NA	19	276	NA	NA	prediction	B046-180619-01	0.774934	62	NA	NA	B331	0.999957	4855265	9	NA	aspA,glnA,gltA,glyA,pgm,tkt,uncA,porA,fn_gyrA	100	100	491.782	1	0	9	additional strain	2021-05-25T00:00:00Z	Dudelange	Bird	Parus major	Sedentary Bird	Passereau	677-19-276	10___81___50___99___120___76___52___19___276	10___81___50___99___120___76___52
B333-250521-01	B333	C. jejuni	11377	?	98	122	98	891	180	150	113	3175	101	970	B333-250521-01.fasta	2021-05-25	isolate	NA	NA	NA	NA	NA	NA	NA	NA	NA	NA	NA	NA	NA	NA	NA	NA	NA	NA	2021-05-25T00:00:00Z	Dudelange	Bird	Turdus	Migratory Bird	Passereau	11377-101-970	98___122___98___891___180___150___113___101___970	98___122___98___891___180___150___113
B335-070621-01	B335	C. jejuni	11584	?	64	22	20	189	134	94	16	3258	11	2372	B335-070621-01.fasta	2021-06-07	isolate	NA	NA	NA	NA	NA	NA	NA	NA	NA	NA	NA	NA	NA	NA	NA	NA	NA	NA	2021-06-07T00:00:00Z	Dudelange	Bird	Corvus monedula	Sedentary Bird	Corvidés	11584-11-2372	64___22___20___189___134___94___16___11___2372	64___22___20___189___134___94___16
NA	B335	NA	11383	NA	64	33	78	18	1136	86	16	NA	11	1598	NA	NA	prediction	B321-050521-01	0.115393	734	NA	NA	B335	0.999957	501980	9	NA	aspA,glnA,gltA,glyA,pgm,tkt,uncA,porA,fn_gyrA	100	97.0122	482.831	3	3	6	additional strain	2021-06-07T00:00:00Z	Dudelange	Bird	Corvus monedula	Sedentary Bird	Corvidés	11383-11-1598	64___33___78___18___1136___86___16___11___1598	64___33___78___18___1136___86___16
NA	B335	NA	11379	NA	64	226	203	189	652	54	16	NA	11	2367	NA	NA	prediction	B338-070621-02	0.062059	740	NA	NA	B335	0.999698	533310	9	NA	aspA,glnA,gltA,glyA,pgm,tkt,uncA,porA,fn_gyrA	100	98.4378	469.766	4	4	5	additional strain	2021-06-07T00:00:00Z	Dudelange	Bird	Corvus monedula	Sedentary Bird	Corvidés	11379-11-2367	64___226___203___189___652___54___16___11___2367	64___226___203___189___652___54___16
NA	B335	NA	10813	NA	64	22	148	100	94	187	16	NA	11	2351	NA	NA	prediction	B050-180619-01	0.053484	715	NA	NA	B335	0.999827	588077	9	NA	aspA,glnA,gltA,glyA,pgm,tkt,uncA,porA,fn_gyrA	100	89.7767	458.981	5	5	4	additional strain	2021-06-07T00:00:00Z	Dudelange	Bird	Corvus monedula	Sedentary Bird	Corvidés	10813-11-2351	64___22___148___100___94___187___16___11___2351	64___22___148___100___94___187___16
B336-070621-01	B336	C. jejuni	11379	?	64	226	203	189	652	54	16	3176	11	2367	B336-070621-01.fasta	2021-06-07	isolate	NA	NA	NA	NA	NA	NA	NA	NA	NA	NA	NA	NA	NA	NA	NA	NA	NA	NA	2021-06-07T00:00:00Z	Dudelange	Bird	Corvus monedula	Sedentary Bird	Corvidés	11379-11-2367	64___226___203___189___652___54___16___11___2367	64___226___203___189___652___54___16
B336-070621-02	B336	C. jejuni	1481	?	35	5	9	5	8	2	2	3177	31	1836	B336-070621-02.fasta	2021-06-07	isolate	NA	NA	NA	NA	NA	NA	NA	NA	NA	NA	NA	NA	NA	NA	NA	NA	NA	NA	2021-06-07T00:00:00Z	Dudelange	Bird	Corvus monedula	Sedentary Bird	Corvidés	1481-31-1836	35___5___9___5___8___2___2___31___1836	35___5___9___5___8___2___2
NA	B336	NA	6451	NA	277	105	20	143	134	54	16	NA	11	348	NA	NA	prediction	50477	0.073375	320	NA	NA	B336	0.999742	798093	8	gltA	aspA,glnA,glyA,pgm,tkt,uncA,porA,fn_gyrA	100	97.8512	481.925	3	3	5	additional strain	2021-06-07T00:00:00Z	Dudelange	Bird	Corvus monedula	Sedentary Bird	Corvidés	6451-11-348	277___105___20___143___134___54___16___11___348	277___105___20___143___134___54___16
B337-070621-01	B337	C. jejuni	1044	ST-658 complex	2	10	2	4	19	3	6	84	27	25	B337-070621-01.fasta	2021-06-07	isolate	NA	NA	NA	NA	NA	NA	NA	NA	NA	NA	NA	NA	NA	NA	NA	NA	NA	NA	2021-06-07T00:00:00Z	Dudelange	Bird	Pica pica	Sedentary Bird	Corvidés	1044-27-25	2___10___2___4___19___3___6___27___25	2___10___2___4___19___3___6
NA	B337	NA	11383	NA	64	33	78	18	1136	86	16	NA	11	1598	NA	NA	prediction	B321-050521-01	0.085308	734	NA	NA	B337	0.999986	118670	8	pgm	aspA,glnA,gltA,glyA,tkt,uncA,porA,fn_gyrA	100	92.9213	422.276	3	0	8	additional strain	2021-06-07T00:00:00Z	Dudelange	Bird	Pica pica	Sedentary Bird	Corvidés	11383-11-1598	64___33___78___18___1136___86___16___11___1598	64___33___78___18___1136___86___16
NA	B337	NA	8368	NA	27	22	22	104	115	86	31	NA	39	680	NA	NA	prediction	50656	0.041294	321	NA	NA	B337	0.999799	68658	9	NA	aspA,glnA,gltA,glyA,pgm,tkt,uncA,porA,fn_gyrA	100	97.8644	396.998	4	1	8	additional strain	2021-06-07T00:00:00Z	Dudelange	Bird	Pica pica	Sedentary Bird	Corvidés	8368-39-680	27___22___22___104___115___86___31___39___680	27___22___22___104___115___86___31
NA	B337	NA	794	NA	10	81	50	87	120	76	52	NA	19	276	NA	NA	prediction	21323	0.012208	62	NA	NA	B337	0.995866	15370	7	aspA,glyA	glnA,gltA,pgm,tkt,uncA,porA,fn_gyrA	100	85.56	251.803	5	0	7	additional strain	2021-06-07T00:00:00Z	Dudelange	Bird	Pica pica	Sedentary Bird	Corvidés	794-19-276	10___81___50___87___120___76___52___19___276	10___81___50___87___120___76___52
B338-070621-02	B338	C. jejuni	11379	?	64	226	203	189	652	54	16	3178	11	2367	B338-070621-02.fasta	2021-06-07	isolate	NA	NA	NA	NA	NA	NA	NA	NA	NA	NA	NA	NA	NA	NA	NA	NA	NA	NA	2021-06-07T00:00:00Z	Dudelange	Bird	Corvus monedula	Sedentary Bird	Corvidés	11379-11-2367	64___226___203___189___652___54___16___11___2367	64___226___203___189___652___54___16
NA	B338	NA	11383	NA	64	33	78	18	1136	86	16	NA	11	1598	NA	NA	prediction	B321-050521-01	0.209499	734	NA	NA	B338	0.999957	1534667	9	NA	aspA,glnA,gltA,glyA,pgm,tkt,uncA,porA,fn_gyrA	100	100	489.99	2	3	6	additional strain	2021-06-07T00:00:00Z	Dudelange	Bird	Corvus monedula	Sedentary Bird	Corvidés	11383-11-1598	64___33___78___18___1136___86___16___11___1598	64___33___78___18___1136___86___16
B339-070621-01	B339	C. jejuni	267	ST-283 complex	4	7	40	4	42	51	1	1407	1	73	B339-070621-01.fasta	2021-06-07	isolate	NA	NA	NA	NA	NA	NA	NA	NA	NA	NA	NA	NA	NA	NA	NA	NA	NA	NA	2021-06-07T00:00:00Z	Dudelange	Bird	Corvus corone	Sedentary Bird	Corvidés	267-1-73	4___7___40___4___42___51___1___1___73	4___7___40___4___42___51___1
B342-070621-01	B342	C. jejuni	19	ST-21 complex	2	1	5	3	2	1	5	82	8	7	B342-070621-01.fasta	2021-06-07	isolate	NA	NA	NA	NA	NA	NA	NA	NA	NA	NA	NA	NA	NA	NA	NA	NA	NA	NA	2021-06-07T00:00:00Z	Dudelange	Bird	Dendrocopos major	Migratory Bird	Passereau	19-8-7	2___1___5___3___2___1___5___8___7	2___1___5___3___2___1___5
NA	B342	NA	354	NA	8	10	2	2	11	12	6	NA	8	957	NA	NA	prediction	34524	0.843148	14	NA	NA	B342	0.999871	4077625	8	pgm	aspA,glnA,gltA,glyA,tkt,uncA,porA,fn_gyrA	100	100	491.138	1	0	8	additional strain	2021-06-07T00:00:00Z	Dudelange	Bird	Dendrocopos major	Migratory Bird	Passereau	354-8-957	8___10___2___2___11___12___6___8___957	8___10___2___2___11___12___6
B345-080621-01	B345	C. jejuni	383	ST-283 complex	4	7	12	4	42	51	1	251	1	73	B345-080621-01.fasta	2021-06-07	isolate	NA	NA	NA	NA	NA	NA	NA	NA	NA	NA	NA	NA	NA	NA	NA	NA	NA	NA	2021-06-07T00:00:00Z	Uerbersyren	Bird	Prunella modularis	Sedentary Bird	Passereau	383-1-73	4___7___12___4___42___51___1___1___73	4___7___12___4___42___51___1
NA	B345	NA	563	NA	17	5	8	5	8	2	4	NA	31	909	NA	NA	prediction	B325-250521-01	0.112014	211	NA	NA	B345	0.995757	899277	9	NA	aspA,glnA,gltA,glyA,pgm,tkt,uncA,porA,fn_gyrA	100	100	481.9	2	0	9	additional strain	2021-06-07T00:00:00Z	Uerbersyren	Bird	Prunella modularis	Sedentary Bird	Passereau	563-31-909	17___5___8___5___8___2___4___31___909	17___5___8___5___8___2___4
B353-210621-01	B353	C. jejuni	448	?	61	70	22	18	2	74	47	2506	31	639	B353-210621-01.fasta	2021-06-21	isolate	NA	NA	NA	NA	NA	NA	NA	NA	NA	NA	NA	NA	NA	NA	NA	NA	NA	NA	2021-06-21T00:00:00Z	Dudelange	Bird	Corvus monedula	Sedentary Bird	Corvidés	448-31-639	61___70___22___18___2___74___47___31___639	61___70___22___18___2___74___47
B354-210621-01	B354	C. jejuni	2162	?	35	43	8	51	8	2	21	3179	7	634	B354-210621-01.fasta	2021-06-21	isolate	NA	NA	NA	NA	NA	NA	NA	NA	NA	NA	NA	NA	NA	NA	NA	NA	NA	NA	2021-06-21T00:00:00Z	Dudelange	Bird	Garrulus	Corvidés	Passereau	2162-7-634	35___43___8___51___8___2___21___7___634	35___43___8___51___8___2___21
NA	B354	NA	677	NA	10	81	50	99	120	76	52	NA	19	276	NA	NA	prediction	B046-180619-01	0.056211	62	NA	NA	B354	0.999743	24510	9	NA	aspA,glnA,gltA,glyA,pgm,tkt,uncA,porA,fn_gyrA	100	86.5667	406.264	2	0	9	additional strain	2021-06-21T00:00:00Z	Dudelange	Bird	Garrulus	Corvidés	Passereau	677-19-276	10___81___50___99___120___76___52___19___276	10___81___50___99___120___76___52
B355-210621-01	B355	C. jejuni	267	ST-283 complex	4	7	40	4	42	51	1	2744	1	73	B355-210621-01.fasta	2021-06-21	isolate	NA	NA	NA	NA	NA	NA	NA	NA	NA	NA	NA	NA	NA	NA	NA	NA	NA	NA	2021-06-21T00:00:00Z	Dudelange	Bird	Fringilla coelebs	Sedentary Bird	Passereau	267-1-73	4___7___40___4___42___51___1___1___73	4___7___40___4___42___51___1
NA	B355	NA	2162	NA	35	43	8	51	8	2	21	NA	31	634	NA	NA	prediction	62524	0.029017	216	NA	NA	B355	0.998343	110069	9	NA	aspA,glnA,gltA,glyA,pgm,tkt,uncA,porA,fn_gyrA	100	97.8589	384.095	3	0	9	additional strain	2021-06-21T00:00:00Z	Dudelange	Bird	Fringilla coelebs	Sedentary Bird	Passereau	2162-31-634	35___43___8___51___8___2___21___31___634	35___43___8___51___8___2___21
B357-210621-01	B357	C. jejuni	11378	?	35	5	8	51	8	2	21	3180	7	1621	B357-210621-01.fasta	2021-06-21	isolate	NA	NA	NA	NA	NA	NA	NA	NA	NA	NA	NA	NA	NA	NA	NA	NA	NA	NA	2021-06-21T00:00:00Z	Dudelange	Bird	Corvus monedula	Sedentary Bird	Corvidés	11378-7-1621	35___5___8___51___8___2___21___7___1621	35___5___8___51___8___2___21
B358-210621-01	B358	C. jejuni	11	ST-45 complex	48	7	10	4	1	7	1	3181	7	217	B358-210621-01.fasta	2021-06-21	isolate	NA	NA	NA	NA	NA	NA	NA	NA	NA	NA	NA	NA	NA	NA	NA	NA	NA	NA	2021-06-21T00:00:00Z	Dudelange	Bird	Turdus	Migratory Bird	Passereau	11-7-217	48___7___10___4___1___7___1___7___217	48___7___10___4___1___7___1
NA	B358	NA	6234	NA	4	326	40	4	42	51	1	NA	1	73	NA	NA	prediction	22296	0.258084	21	NA	NA	B358	0.99987	1964271	8	glnA	aspA,gltA,glyA,pgm,tkt,uncA,porA,fn_gyrA	100	98.845	479.659	2	3	5	additional strain	2021-06-21T00:00:00Z	Dudelange	Bird	Turdus	Migratory Bird	Passereau	6234-1-73	4___326___40___4___42___51___1___1___73	4___326___40___4___42___51___1
B361-210621-01	B361	C. jejuni	230	ST-45 complex	4	7	41	4	42	7	1	2282	1	217	B361-210621-01.fasta	2021-06-21	isolate	NA	NA	NA	NA	NA	NA	NA	NA	NA	NA	NA	NA	NA	NA	NA	NA	NA	NA	2021-06-21T00:00:00Z	Dudelange	Bird	Turdus	Migratory Bird	Passereau	230-1-217	4___7___41___4___42___7___1___1___217	4___7___41___4___42___7___1
B362-210621-01	B362	C. jejuni	267	ST-283 complex	4	7	40	4	42	51	1	2744	1	73	B362-210621-01.fasta	2021-06-21	isolate	NA	NA	NA	NA	NA	NA	NA	NA	NA	NA	NA	NA	NA	NA	NA	NA	NA	NA	2021-06-21T00:00:00Z	Dudelange	Bird	Turdus	Migratory Bird	Passereau	267-1-73	4___7___40___4___42___51___1___1___73	4___7___40___4___42___51___1
NA	B362	NA	677	NA	10	81	50	99	120	76	52	NA	19	276	NA	NA	prediction	B046-180619-01	0.099071	62	NA	NA	B362	0.999928	200254	9	NA	aspA,glnA,gltA,glyA,pgm,tkt,uncA,porA,fn_gyrA	100	99.89	461.054	2	0	9	additional strain	2021-06-21T00:00:00Z	Dudelange	Bird	Turdus	Migratory Bird	Passereau	677-19-276	10___81___50___99___120___76___52___19___276	10___81___50___99___120___76___52
B364-210621-01	B364	C. jejuni	11380	?	18	33	72	98	116	871	6	3182	11	200	B364-210621-01.fasta	2021-06-21	isolate	NA	NA	NA	NA	NA	NA	NA	NA	NA	NA	NA	NA	NA	NA	NA	NA	NA	NA	2021-06-21T00:00:00Z	Dudelange	Bird	Pica pica	Sedentary Bird	Corvidés	11380-11-200	18___33___72___98___116___871___6___11___200	18___33___72___98___116___871___6
W021-240919-01	W021	C. jejuni	704	?	2	29	4	27	10	25	57	2604	13	886	W021-240919-01.fasta	2019-09-12	isolate	NA	NA	NA	NA	NA	NA	NA	NA	NA	NA	NA	NA	NA	NA	NA	NA	NA	NA	2019-09-12T00:00:00Z	Moselle (Wasserbillig)	Surface water	Moselle	NA	NA	704-13-886	2___29___4___27___10___25___57___13___886	2___29___4___27___10___25___57
NA	W022	NA	683	NA	35	43	9	5	121	46	21	NA	80	468	NA	NA	prediction	42540	0.503319	164	NA	NA	W022	0.998199	2627421	9	NA	aspA,glnA,gltA,glyA,pgm,tkt,uncA,porA,fn_gyrA	100	100	489.149	1	0	9	additional strain	2019-12-02T00:00:00Z	Alzette Schifflange	Surface water	Alzette	NA	NA	683-80-468	35___43___9___5___121___46___21___80___468	35___43___9___5___121___46___21
W025-02122019-02	W025	C. jejuni	11466	?	18	33	649	325	116	104	6	2278	100	2349	W025-02122019-02.fasta	2019-12-02	isolate	NA	NA	NA	NA	NA	NA	NA	NA	NA	NA	NA	NA	NA	NA	NA	NA	NA	NA	2019-12-02T00:00:00Z	Alzette Hesperange Amont step	Surface water	Alzette	NA	NA	11466-100-2349	18___33___649___325___116___104___6___100___2349	18___33___649___325___116___104___6
NA	W026	NA	692	NA	37	52	57	26	127	29	23	NA	4	3123	NA	NA	prediction	78931	0.239241	692	NA	NA	W026	0.997402	299523	8	porA	aspA,glnA,gltA,glyA,pgm,tkt,uncA,fn_gyrA	100	100	465.914	1	0	8	additional strain	2019-12-02T00:00:00Z	Alzette Hesperange Aval step	Surface water	Alzette	NA	NA	692-4-3123	37___52___57___26___127___29___23___4___3123	37___52___57___26___127___29___23
NA	W026	NA	693	NA	2	29	4	48	13	24	57	NA	13	819	NA	NA	prediction	78944	0.095749	349	NA	NA	W026	0.999814	64594	8	glyA	aspA,glnA,gltA,pgm,tkt,uncA,porA,fn_gyrA	100	83.3838	341.233	4	0	8	additional strain	2019-12-02T00:00:00Z	Alzette Hesperange Aval step	Surface water	Alzette	NA	NA	693-13-819	2___29___4___48___13___24___57___13___819	2___29___4___48___13___24___57
W052-240920-02	W052	C. jejuni	991	ST-692 complex	37	52	57	26	107	29	23	2620	4	6	W052-240920-02.fasta	2020-09-24	isolate	NA	NA	NA	NA	NA	NA	NA	NA	NA	NA	NA	NA	NA	NA	NA	NA	NA	NA	2020-09-24T00:00:00Z	Sûre (Wasserbillig)	Surface water	Sûre	NA	NA	991-4-6	37___52___57___26___107___29___23___4___6	37___52___57___26___107___29___23
NA	W053	NA	3904	NA	1	7	10	349	261	7	1	NA	7	2027	NA	NA	prediction	112078	0.093399	246	NA	NA	W053	0.999655	23510	8	aspA	glnA,gltA,glyA,pgm,tkt,uncA,porA,fn_gyrA	100	92.9013	350.66	1	0	8	additional strain	2020-10-13T00:00:00Z	Alzette Schifflange	Surface water	Alzette	NA	NA	3904-7-2027	1___7___10___349___261___7___1___7___2027	1___7___10___349___261___7___1
NA	W053	NA	177	NA	17	2	8	5	8	2	4	NA	80	1836	NA	NA	prediction	79263	0.043073	698	NA	NA	W053	0.998951	50441	7	porA,fn_gyrA	aspA,glnA,gltA,glyA,pgm,tkt,uncA	100	100	424.928	7	1	6	additional strain	2020-10-13T00:00:00Z	Alzette Schifflange	Surface water	Alzette	NA	NA	177-80-1836	17___2___8___5___8___2___4___80___1836	17___2___8___5___8___2___4
NA	W054	NA	563	NA	17	5	8	5	8	2	4	NA	31	2648	NA	NA	prediction	42534	0.066781	211	NA	NA	W054	0.998933	37584	8	uncA	aspA,glnA,gltA,glyA,pgm,tkt,porA,fn_gyrA	99.9688	92.81	412.277	2	0	8	additional strain	2020-10-13T00:00:00Z	Alzette Huncherange	Surface water	Alzette	NA	NA	563-31-2648	17___5___8___5___8___2___4___31___2648	17___5___8___5___8___2___4
NA	W078	NA	45	NA	4	7	10	4	1	7	1	NA	80	217	NA	NA	prediction	57334	0.101773	40	NA	NA	W078	0.997766	79612	9	NA	aspA,glnA,gltA,glyA,pgm,tkt,uncA,porA,fn_gyrA	100	100	435.504	1	0	9	additional strain	2021-04-19T00:00:00Z	Alzette Huncherange	Surface water	Alzette	NA	NA	45-80-217	4___7___10___4___1___7___1___80___217	4___7___10___4___1___7___1
NA	W079	NA	801	NA	64	70	68	97	122	106	16	NA	36	127	NA	NA	prediction	B113-130819-01	0.254012	720	NA	NA	W079	0.999971	250667	9	NA	aspA,glnA,gltA,glyA,pgm,tkt,uncA,porA,fn_gyrA	100	100	462.476	1	0	9	additional strain	2021-04-19T00:00:00Z	Alzette Hesperange Amont step	Surface water	Alzette	NA	NA	801-36-127	64___70___68___97___122___106___16___36___127	64___70___68___97___122___106___16
NA	W079	NA	19	NA	2	1	5	3	2	1	5	NA	8	582	NA	NA	prediction	109829	0.049151	3	NA	NA	W079	1	103065	8	porA	aspA,glnA,gltA,glyA,pgm,tkt,uncA,fn_gyrA	100	98.6375	393.406	7	1	7	additional strain	2021-04-19T00:00:00Z	Alzette Hesperange Amont step	Surface water	Alzette	NA	NA	19-8-582	2___1___5___3___2___1___5___8___582	2___1___5___3___2___1___5
NA	W081	NA	11384	NA	17	2	670	5	8	2	4	NA	31	236	NA	NA	prediction	B063-020719-01	0.106305	226	NA	NA	W081	0.997425	248147	7	gltA,porA	aspA,glnA,glyA,pgm,tkt,uncA,fn_gyrA	100	100	460.528	1	0	7	additional strain	2021-05-25T00:00:00Z	Alzette Schifflange	Surface water	Alzette	NA	NA	11384-31-236	17___2___670___5___8___2___4___31___236	17___2___670___5___8___2___4
NA	W082	NA	45	NA	4	7	10	4	1	7	1	NA	7	49	NA	NA	prediction	B037-110619-01	0.084161	58	NA	NA	W082	0.994046	53546	9	NA	aspA,glnA,gltA,glyA,pgm,tkt,uncA,porA,fn_gyrA	100	100	367.727	2	0	9	additional strain	2021-05-25T00:00:00Z	Alzette Huncherange	Surface water	Alzette	NA	NA	45-7-49	4___7___10___4___1___7___1___7___49	4___7___10___4___1___7___1
NA	W083	NA	6591	NA	64	105	20	77	94	103	16	NA	11	1634	NA	NA	prediction	B121-270819-02	0.029774	724	NA	NA	W083	0.991184	15404	7	glnA,gltA	aspA,glyA,pgm,tkt,uncA,porA,fn_gyrA	100	90.9486	265.934	9	1	6	additional strain	2021-05-25T00:00:00Z	Alzette Hesperange Amont step	Surface water	Alzette	NA	NA	6591-11-1634	64___105___20___77___94___103___16___11___1634	64___105___20___77___94___103___16
NA	W083	NA	1231	NA	27	2	22	104	43	86	31	NA	31	270	NA	NA	prediction	42085	0.029282	536	NA	NA	W083	0.991501	21781	7	aspA,uncA	glnA,gltA,glyA,pgm,tkt,porA,fn_gyrA	100	88.2143	300.682	10	1	6	additional strain	2021-05-25T00:00:00Z	Alzette Hesperange Amont step	Surface water	Alzette	NA	NA	1231-31-270	27___2___22___104___43___86___31___31___270	27___2___22___104___43___86___31
NA	W083	NA	177	NA	17	2	8	5	8	2	4	NA	80	1836	NA	NA	prediction	79263	0.024487	698	NA	NA	W083	0.992754	25084	7	porA,fn_gyrA	aspA,glnA,gltA,glyA,pgm,tkt,uncA	99.9671	99.5014	283.356	17	1	6	additional strain	2021-05-25T00:00:00Z	Alzette Hesperange Amont step	Surface water	Alzette	NA	NA	177-80-1836	17___2___8___5___8___2___4___80___1836	17___2___8___5___8___2___4
NA	W084	NA	1231	NA	27	2	22	104	43	86	31	NA	31	270	NA	NA	prediction	42085	0.213993	536	NA	NA	W084	0.997895	237312	7	aspA,fn_gyrA	glnA,gltA,glyA,pgm,tkt,uncA,porA	100	100	484.422	1	0	7	additional strain	2021-05-25T00:00:00Z	Alzette Hesperange Aval step	Surface water	Alzette	NA	NA	1231-31-270	27___2___22___104___43___86___31___31___270	27___2___22___104___43___86___31
W087-210621-01	W087	C. jejuni	10102	?	64	22	203	100	134	160	60	3184	11	2366	W087-210621-01.fasta	2021-06-21	isolate	NA	NA	NA	NA	NA	NA	NA	NA	NA	NA	NA	NA	NA	NA	NA	NA	NA	NA	2021-06-21T00:00:00Z	Alzette Hesperange Amont step	Surface water	Alzette	NA	NA	10102-11-2366	64___22___203___100___134___160___60___11___2366	64___22___203___100___134___160___60
NA	W087	NA	267	NA	4	7	40	4	42	51	1	NA	1	73	NA	NA	prediction	B339-070621-01	0.668439	21	NA	NA	W087	0.999928	1387262	9	NA	aspA,glnA,gltA,glyA,pgm,tkt,uncA,porA,fn_gyrA	100	100	488.201	1	0	9	additional strain	2021-06-21T00:00:00Z	Alzette Hesperange Amont step	Surface water	Alzette	NA	NA	267-1-73	4___7___40___4___42___51___1___1___73	4___7___40___4___42___51___1
NA	W087	NA	4570	NA	64	22	20	100	242	204	16	NA	37	1795	NA	NA	prediction	B320-050521-02	0.092687	733	NA	NA	W087	0.999942	199976	9	NA	aspA,glnA,gltA,glyA,pgm,tkt,uncA,porA,fn_gyrA	100	98.23	468.469	2	1	8	additional strain	2021-06-21T00:00:00Z	Alzette Hesperange Amont step	Surface water	Alzette	NA	NA	4570-37-1795	64___22___20___100___242___204___16___37___1795	64___22___20___100___242___204___16

## Sheet: prevalent STs
ST	unique_mlst9profiles	n_strains	n_from_isolates	min_date	max_date
383	1	12	6	2019-07-02T00:00:00Z	2021-06-07T00:00:00Z
45	4	9	6	2019-05-07T00:00:00Z	2021-05-25T00:00:00Z
677	1	7	4	2019-05-07T00:00:00Z	2021-06-21T00:00:00Z
11379	1	6	2	2019-06-11T00:00:00Z	2021-06-07T00:00:00Z
11383	1	5	1	2021-05-05T00:00:00Z	2021-06-07T00:00:00Z
19	3	5	4	2019-06-18T00:00:00Z	2021-06-07T00:00:00Z
448	3	5	4	2019-05-07T00:00:00Z	2021-06-21T00:00:00Z
11376	1	4	4	2021-03-06T00:00:00Z	2021-04-14T00:00:00Z
267	1	4	3	2021-06-07T00:00:00Z	2021-06-21T00:00:00Z
6313	1	4	4	2021-03-27T00:00:00Z	2021-04-14T00:00:00Z
1080	1	3	2	2019-06-18T00:00:00Z	2021-04-14T00:00:00Z
10813	1	3	2	2019-06-11T00:00:00Z	2021-06-07T00:00:00Z
10815	1	3	1	2019-06-11T00:00:00Z	2019-06-18T00:00:00Z
11	1	3	3	2020-08-13T00:00:00Z	2021-06-21T00:00:00Z
177	2	3	1	2019-07-30T00:00:00Z	2021-05-25T00:00:00Z
4570	1	3	2	2021-05-05T00:00:00Z	2021-06-21T00:00:00Z
563	2	3	1	2020-10-13T00:00:00Z	2021-06-07T00:00:00Z
6427	1	3	0	2019-06-11T00:00:00Z	2019-06-18T00:00:00Z
1044	1	2	2	2020-07-23T00:00:00Z	2021-06-07T00:00:00Z
10817	1	2	1	2019-06-11T00:00:00Z	2019-06-11T00:00:00Z
11384	1	2	1	2019-07-02T00:00:00Z	2021-05-25T00:00:00Z
1231	1	2	0	2021-05-25T00:00:00Z	2021-05-25T00:00:00Z
1277	1	2	1	2019-08-13T00:00:00Z	2020-08-13T00:00:00Z
2162	2	2	1	2021-06-21T00:00:00Z	2021-06-21T00:00:00Z
6591	1	2	1	2019-08-27T00:00:00Z	2021-05-25T00:00:00Z
692	1	2	0	2019-10-09T00:00:00Z	2019-12-02T00:00:00Z
7836	1	2	0	2019-06-11T00:00:00Z	2019-06-18T00:00:00Z
7882	1	2	1	2019-06-18T00:00:00Z	2019-08-13T00:00:00Z
801	1	2	1	2019-06-18T00:00:00Z	2021-04-19T00:00:00Z
8614	1	2	2	2020-08-13T00:00:00Z	2020-08-20T00:00:00Z
951	1	2	1	2019-05-23T00:00:00Z	2019-07-30T00:00:00Z
10102	1	1	1	2021-06-21T00:00:00Z	2021-06-21T00:00:00Z
1021	1	1	0	2021-05-25T00:00:00Z	2021-05-25T00:00:00Z
10810	1	1	1	2019-08-13T00:00:00Z	2019-08-13T00:00:00Z
10811	1	1	1	2019-06-11T00:00:00Z	2019-06-11T00:00:00Z
10818	1	1	1	2019-06-11T00:00:00Z	2019-06-11T00:00:00Z
10820	1	1	1	2019-06-11T00:00:00Z	2019-06-11T00:00:00Z
11004	1	1	1	2019-08-27T00:00:00Z	2019-08-27T00:00:00Z
11377	1	1	1	2021-05-25T00:00:00Z	2021-05-25T00:00:00Z
11378	1	1	1	2021-06-21T00:00:00Z	2021-06-21T00:00:00Z
11380	1	1	1	2021-06-21T00:00:00Z	2021-06-21T00:00:00Z
11381	1	1	1	2020-08-27T00:00:00Z	2020-08-27T00:00:00Z
11382	1	1	1	2021-05-25T00:00:00Z	2021-05-25T00:00:00Z
11385	1	1	1	2020-08-27T00:00:00Z	2020-08-27T00:00:00Z
11413	1	1	1	2021-04-14T00:00:00Z	2021-04-14T00:00:00Z
11466	1	1	1	2019-12-02T00:00:00Z	2019-12-02T00:00:00Z
11584	1	1	1	2021-06-07T00:00:00Z	2021-06-07T00:00:00Z
1294	1	1	1	2020-09-24T00:00:00Z	2020-09-24T00:00:00Z
1316	1	1	1	2021-04-14T00:00:00Z	2021-04-14T00:00:00Z
1481	1	1	1	2021-06-07T00:00:00Z	2021-06-07T00:00:00Z
1540	1	1	1	2019-06-11T00:00:00Z	2019-06-11T00:00:00Z
22	1	1	1	2019-07-02T00:00:00Z	2019-07-02T00:00:00Z
230	1	1	1	2021-06-21T00:00:00Z	2021-06-21T00:00:00Z
2401	1	1	0	2019-06-18T00:00:00Z	2019-06-18T00:00:00Z
2491	1	1	1	2019-05-23T00:00:00Z	2019-05-23T00:00:00Z
3536	1	1	1	2019-06-18T00:00:00Z	2019-06-18T00:00:00Z
354	1	1	0	2021-06-07T00:00:00Z	2021-06-07T00:00:00Z
3904	1	1	0	2020-10-13T00:00:00Z	2020-10-13T00:00:00Z
464	1	1	1	2019-06-18T00:00:00Z	2019-06-18T00:00:00Z
475	1	1	1	2019-07-30T00:00:00Z	2019-07-30T00:00:00Z
48	1	1	1	2019-05-07T00:00:00Z	2019-05-07T00:00:00Z
5207	1	1	1	2020-08-20T00:00:00Z	2020-08-20T00:00:00Z
5846	1	1	1	2019-10-22T00:00:00Z	2019-10-22T00:00:00Z
6234	1	1	0	2021-06-21T00:00:00Z	2021-06-21T00:00:00Z
6386	1	1	1	2021-05-25T00:00:00Z	2021-05-25T00:00:00Z
6451	1	1	0	2021-06-07T00:00:00Z	2021-06-07T00:00:00Z
683	1	1	0	2019-12-02T00:00:00Z	2019-12-02T00:00:00Z
693	1	1	0	2019-12-02T00:00:00Z	2019-12-02T00:00:00Z
704	1	1	1	2019-09-12T00:00:00Z	2019-09-12T00:00:00Z
7815	1	1	1	2019-06-18T00:00:00Z	2019-06-18T00:00:00Z
7825	1	1	0	2019-06-11T00:00:00Z	2019-06-11T00:00:00Z
7831	1	1	0	2019-06-11T00:00:00Z	2019-06-11T00:00:00Z
794	1	1	0	2021-06-07T00:00:00Z	2021-06-07T00:00:00Z
8202	1	1	0	2019-07-02T00:00:00Z	2019-07-02T00:00:00Z
8368	1	1	0	2021-06-07T00:00:00Z	2021-06-07T00:00:00Z
991	1	1	1	2020-09-24T00:00:00Z	2020-09-24T00:00:00Z
